# Supplementary material for: Revealing the pathogenic changes of PAH based on multiomics characteristics
Source: Springer Nature journal article supplement (doi:10.1186/s12967-019-1981-5), 2019-07-22
Supplement: MOESM4 [file 16970506]

**Table S4.** The detailed information of the significant KEGG pathways. Three omics correlated information of genes in the selected key KEGG pathways. The fold change (FC), the direction (dir) and p value (p) of three omics information are shown. Meanwhile, the chromosomal localization (Chr), the strand of methylation (strand) and methylated positions (Gene\_Info) are also shown in methylation information.

**Table S4.** The detailed information of the significant KEGG pathways.

| KEGG pathway                        | Gene                                          | Gene name                                              | mRNA information   |      |      |            | protein information |      |          |          | Methylation information |     |     |          |           |         |
|-------------------------------------|-----------------------------------------------|--------------------------------------------------------|--------------------|------|------|------------|---------------------|------|----------|----------|-------------------------|-----|-----|----------|-----------|---------|
|                                     |                                               |                                                        | mRNA name          | FC   | dir  | p value    | protein             | FC   | dir      | p value  | FC                      | dir | chr | strand   | Gene_Info | p value |
| Complement and coagulation cascades | C5                                            | complement C5                                          | ENSRNOT00000092736 | 0.92 | down | 0.44       | A0A096P6L9          | 1.29 | up       | 6.09E-17 |                         |     |     |          |           |         |
|                                     | C5                                            | complement C5                                          | ENSRNOT00000025534 | 1.01 | up   | 0.34       | A0A096P6L9          | 1.29 | up       | 6.09E-17 |                         |     |     |          |           |         |
|                                     | Kng1                                          | kininogen 1                                            | ENSRNOT00000080562 | 1.02 | up   | 0.47       | A0A0G2KAY3          | 3.00 | up       | 1.12E-18 |                         |     |     |          |           |         |
|                                     | Kng1                                          | kininogen 1                                            | ENSRNOT00000080949 | 0.9  | down | 0.34       | A0A0G2KAY3          | 3.00 | up       | 1.12E-18 |                         |     |     |          |           |         |
|                                     | Kng1                                          | kininogen 1                                            | ENSRNOT00000084867 | 1.52 | up   | 0.11       | A0A0G2KAY3          | 3.00 | up       | 1.12E-18 |                         |     |     |          |           |         |
|                                     | C4bpb                                         | complement component 4 binding protein, beta           | ENSRNOT00000005505 | 0.97 | down | 0.86       | A0A5C5              | 1.90 | up       | 6.50E-16 |                         |     |     |          |           |         |
|                                     | C6                                            | complement component 6                                 | MSTRG.10628.1      | 2.8  | up   | 0          | F1M7F7              | 1.31 | up       | 3.07E-17 |                         |     |     |          |           |         |
|                                     | C6                                            | complement component 6                                 | MSTRG.10628.4      | 2.28 | up   | 0.06       | F1M7F7              | 1.31 | up       | 3.07E-17 |                         |     |     |          |           |         |
|                                     | C6                                            | complement component 6                                 | MSTRG.10628.2      | 1.04 | up   | 0.04       | F1M7F7              | 1.31 | up       | 3.07E-17 |                         |     |     |          |           |         |
|                                     | C6                                            | complement component 6                                 | MSTRG.10628.3      | 1.33 | up   | 0.08       | F1M7F7              | 1.31 | up       | 3.07E-17 |                         |     |     |          |           |         |
|                                     | C6                                            | complement component 6                                 | MSTRG.10628.6      | 2.15 | up   | 0          | F1M7F7              | 1.31 | up       | 3.07E-17 |                         |     |     |          |           |         |
|                                     | C1qb                                          | complement component 1, q subcomponent, B chain        | ENSRNOT00000017060 | 1.2  | up   | 0.7        | G3V7N9              | 1.25 | up       | 9.74E-13 |                         |     |     |          |           |         |
|                                     | C1qb                                          | complement component 1, q subcomponent, B chain        | MSTRG.16594.1      | 1.06 | up   | 0.85       | G3V7N9              | 1.25 | up       | 9.74E-13 |                         |     |     |          |           |         |
|                                     | F13a1                                         | coagulation factor XIII, A1 polypeptide                | ENSRNOT00000021568 | 1.91 | up   | 0.06       | G3V811              | 1.27 | up       | 1.99E-17 |                         |     |     |          |           |         |
|                                     | C3                                            | complement component 3                                 | ENSRNOT00000075494 | 1.68 | up   | 0.25       | M0RBJ7              | 1.26 | up       | 7.42E-19 |                         |     |     |          |           |         |
|                                     | C3                                            | complement component 3                                 | MSTRG.20503.3      | 1.41 | up   | 0.05       | M0RBJ7              | 1.26 | up       | 7.42E-19 |                         |     |     |          |           |         |
|                                     | C3                                            | complement component 3                                 | MSTRG.20503.1      | 1.22 | up   | 0.46       | M0RBJ7              | 1.26 | up       | 7.42E-19 |                         |     |     |          |           |         |
|                                     | C3                                            | complement component 3                                 | ENSRNOT00000073042 | 1.69 | up   | 0.24       | M0RBJ7              | 1.26 | up       | 7.42E-19 |                         |     |     |          |           |         |
|                                     | Thbd                                          | thrombomodulin                                         | ENSRNOT00000062000 | 0.57 | down | 0.75       | O35370              | 0.60 | down     | 5.77E-06 |                         |     |     |          |           |         |
|                                     | Fgg                                           | fibrinogen gamma chain                                 | ENSRNOT00000034521 | 1.27 | up   | 0.41       | P02680              | 1.57 | up       | 3.22E-17 |                         |     |     |          |           |         |
|                                     | A2m                                           | alpha-2-macroglobulin                                  | ENSRNOT00000019346 | 2.78 | up   | 0.26       | P06238              | 1.93 | up       | 1.94E-20 |                         |     |     |          |           |         |
|                                     | Fgb                                           | fibrinogen beta chain                                  | ENSRNOT00000009813 | 0.96 | down | 0.4        | P14480              | 1.49 | up       | 2.02E-21 |                         |     |     |          |           |         |
|                                     | Proc                                          | protein C                                              | ENSRNOT00000019596 | 0.94 | down | 0.4        | P31394              | 0.79 | down     | 7.53E-11 |                         |     |     |          |           |         |
|                                     | F3                                            | coagulation factor III (thromboplastin, tissue factor) | ENSRNOT00000015836 | 2.53 | up   | 0.48       | P42533              | 0.71 | down     | 4.47E-19 |                         |     |     |          |           |         |
|                                     | F3                                            | coagulation factor III (thromboplastin, tissue factor) | MSTRG.11600.1      | 0.23 | down | 0.45       | P42533              | 0.71 | down     | 4.47E-19 |                         |     |     |          |           |         |
|                                     | F3                                            | coagulation factor III (thromboplastin, tissue factor) | MSTRG.11600.3      | 0.67 | down | 0.46       | P42533              | 0.71 | down     | 4.47E-19 |                         |     |     |          |           |         |
|                                     | C5ar1                                         | complement component 5a receptor 1                     | MSTRG.545.1        | 1.72 | up   | 0.49       | P97520              | 1.47 | up       | 9.88E-13 |                         |     |     |          |           |         |
|                                     | C5ar1                                         | complement component 5a receptor 1                     | ENSRNOT00000073034 | 1.05 | up   | 0.6        | P97520              | 1.47 | up       | 9.88E-13 |                         |     |     |          |           |         |
|                                     | C9                                            | complement component 9                                 | ENSRNOT00000018545 | 0.97 | down | 0.59       | Q62930              | 1.44 | up       | 6.93E-18 |                         |     |     |          |           |         |
|                                     | F10                                           | coagulation factor X                                   | ENSRNOT00000026677 | 1.26 | up   | 0.42       | Q63207              | 1.32 | up       | 1.70E-14 |                         |     |     |          |           |         |
| C4bpa                               | complement component 4 binding protein, alpha | ENSRNOT00000005461                                     | 1.46               | up   | 0.07 | Q63514     | 1.64                | up   | 6.23E-17 |          |                         |     |     |          |           |         |
| Mgst2                               | microsomal glutathione S-transferase 2        | MSTRG.10921.1                                          | 0.97               | down | 0.2  | A0A0G2JU12 | 1.49                | up   | 4.54E-11 |          |                         |     |     |          |           |         |
| Mgst2                               | microsomal glutathione S-transferase 2        | MSTRG.10921.2                                          | 1.07               | up   | 0.88 | A0A0G2JU12 | 1.49                | up   | 4.54E-11 |          |                         |     |     |          |           |         |
| Mgst2                               | microsomal glutathione S-transferase 2        | ENSRNOT00000088846                                     | 1.09               | up   | 0.66 | A0A0G2JU12 | 1.49                | up   | 4.54E-11 |          |                         |     |     |          |           |         |
| Aox3                                | aldehyde oxidase 3                            | ENSRNOT00000081146                                     | 1.28               | up   | 0.44 | A0A0G2K1Z5 | 0.73                | down | 6.67E-16 |          |                         |     |     |          |           |         |
| Aox3                                | aldehyde oxidase 3                            | ENSRNOT00000093062                                     | 1                  | down | 0.47 | A0A0G2K1Z5 | 0.73                | down | 6.67E-16 |          |                         |     |     |          |           |         |
| Aox3                                | aldehyde oxidase 3                            | ENSRNOT00000092841                                     | 1.07               | up   | 0.17 | A0A0G2K1Z5 | 0.73                | down | 6.67E-16 |          |                         |     |     |          |           |         |
| Aox3                                | aldehyde oxidase 3                            | ENSRNOT00000092786                                     | 1.11               | up   | 0.7  | A0A0G2K1Z5 | 0.73                | down | 6.67E-16 |          |                         |     |     |          |           |         |
| Aox3                                | aldehyde oxidase 3                            | ENSRNOT00000093120                                     | 0.8                | down | 0.48 | A0A0G2K1Z5 | 0.73                | down | 6.67E-16 |          |                         |     |     |          |           |         |
| Aox1                                | aldehyde oxidase 1                            | MSTRG.20927.3                                          | 0.76               | down | 0.15 | F1LRQ1     | 0.73                | down | 3.54E-17 | 0.36     | hypo-methylated         | 9   | "+" | intron   | 1.54E-07  |         |
| Aox1                                | aldehyde oxidase 1                            | ENSRNOT00000092805                                     | 0.98               | down | 0.5  | F1LRQ1     | 0.73                | down | 3.54E-17 | 0.36     | hypo-methylated         | 9   | "+" | intron   | 1.54E-07  |         |
| Aox1                                | aldehyde oxidase 1                            | MSTRG.20927.1                                          | 0.71               | down | 0.43 | F1LRQ1     | 0.73                | down | 3.54E-17 | 0.36     | hypo-methylated         | 9   | "+" | intron   | 1.54E-07  |         |
| Aox1                                | aldehyde oxidase 1                            | MSTRG.20927.4                                          | 0.9                | down | 0.81 | F1LRQ1     | 0.73                | down | 3.54E-17 | 0.36     | hypo-methylated         | 9   | "+" | intron   | 1.54E-07  |         |
| Aox1                                | aldehyde oxidase 1                            | ENSRNOT00000068633                                     | 1.13               | up   | 0.8  | F1LRQ1     | 0.73                | down | 3.54E-17 | 0.36     | hypo-methylated         | 9   | "+" | intron   | 1.54E-07  |         |
| Aox1                                | aldehyde oxidase 1                            | MSTRG.20927.2                                          | 0.98               | down | 0.92 | F1LRQ1     | 0.73                | down | 3.54E-17 | 0.36     | hypo-methylated         | 9   | "+" | intron   | 1.54E-07  |         |
| Aox1                                | aldehyde oxidase 1                            | MSTRG.20927.5                                          | 0.66               | down | 0.37 | F1LRQ1     | 0.73                | down | 3.54E-17 | 0.36     | hypo-methylated         | 9   | "+" | intron   | 1.54E-07  |         |
| Aox1                                | aldehyde oxidase 1                            | ENSRNOT00000092872                                     | 1                  | down | 0.6  | F1LRQ1     | 0.73                | down | 3.54E-17 | 0.36     | hypo-methylated         | 9   | "+" | intron   | 1.54E-07  |         |
| Aox1                                | aldehyde oxidase 1                            | MSTRG.20927.7                                          | 1.37               | up   | 0.03 | F1LRQ1     | 0.73                | down | 3.54E-17 | 0.36     | hypo-methylated         | 9   | "+" | intron   | 1.54E-07  |         |
| Gsta3                               | glutathione S-transferase alpha 3             | ENSRNOT00000088416                                     | 0.76               | down | 0.31 | P04904     | 0.64                | down | 2.87E-15 | 2.74     | hyper-methylated        | 9   | "+" | exon     | 2.28E-04  |         |
| Gsta3                               | glutathione S-transferase alpha 3             | MSTRG.10921.1                                          | 1.01               | up   | 0.84 | P04904     | 0.64                | down | 2.87E-15 | 2.74     | hyper-methylated        | 9   | "+" | exon     | 2.28E-04  |         |
| Adh1                                | alcohol dehydrogenase 1 (class I)             | ENSRNOT00000083682                                     | 0.89               | down | 0.64 | P06757     | 0.78                | down | 2.84E-16 |          |                         |     |     |          |           |         |
| Adh1                                | alcohol dehydrogenase 1 (class I)             | MSTRG.11708.1                                          | 1                  | down | 0.97 | P06757     | 0.78                | down | 2.84E-16 |          |                         |     |     |          |           |         |
| Adh1                                | alcohol dehydrogenase 1 (class I)             | ENSRNOT00000085067                                     | 0.99               | down | 0.97 | P06757     | 0.78                | down | 2.84E-16 |          |                         |     |     |          |           |         |
| Gstm3                               | glutathione S-transferase mu 3                | ENSRNOT00000025800                                     | 1.01               | up   | 0.91 | P08009     | 0.59                | down | 2.02E-20 |          |                         |     |     |          |           |         |
| Aldh3a1                             | aldehyde dehydrogenase 3 family, member A1    | ENSRNOT00000003182                                     | 0.45               | down | 0.25 | P11883     | 0.72                | down | 6.70E-23 |          |                         |     |     |          |           |         |
| Gsta4                               | glutathione S-transferase alpha 4             | MSTRG.20020.1                                          | 0.78               | down | 0.48 | P14942     | 0.76                | down | 4.34E-13 |          |                         |     |     |          |           |         |
| Gsta4                               | glutathione S-transferase alpha 4             | ENSRNOT00000090146                                     | 0.88               | down | 0.55 | P14942     | 0.76                | down | 4.34E-13 |          |                         |     |     |          |           |         |
| Gsta4                               | glutathione S-transferase alpha 4             | ENSRNOT00000012348                                     | 1.17               | up   | 0.76 | P14942     | 0.76                | down | 4.34E-13 |          |                         |     |     |          |           |         |
| Gstt1                               | glutathione S-transferase theta 1             | ENSRNOT00000001669                                     | 0.92               | down | 0.8  | Q01579     | 0.80                | down | 1.36E-15 | 0.44     | hypo-methylated         | 20  | "+" | exon     | 5.43E-04  |         |
| Gstt1                               | glutathione S-transferase theta 1             | MSTRG.12200.2                                          | 0.67               | down | 0.23 | Q01579     | 0.80                | down | 1.36E-15 | 0.44     | hypo-methylated         | 20  | "+" | exon     | 5.43E-04  |         |
| Fmo5                                | flavin containing monooxygenase 5             | ENSRNOT00000024423                                     | 1.49               | up   | 0.37 | Q8K4C0     | 1.26                | up   | 1.37E-07 |          |                         |     |     |          |           |         |
| Mgst2                               | microsomal glutathione S-transferase 2        | MSTRG.10921.1                                          | 0.97               | down | 0.2  | A0A0G2JU12 | 1.49                | up   | 4.54E-11 |          |                         |     |     |          |           |         |
| Mgst2                               | microsomal glutathione S-transferase 2        | MSTRG.10921.2                                          | 1.07               | up   | 0.88 | A0A0G2JU12 | 1.49                | up   | 4.54E-11 |          |                         |     |     |          |           |         |
| Gsta3                               | glutathione S-transferase alpha 3             | ENSRNOT00000088416                                     | 0.76               | down | 0.31 | P04904     | 0.64                | down | 2.87E-15 | 2.74     | hyper-methylated        | 9   | "+" | exon     | 2.28E-04  |         |
| Gsta3                               | glutathione S-transferase alpha 3             | ENSRNOT00000077372                                     | 1.01               | up   | 0.84 | P04904     | 0.64                | down | 2.87E-15 | 2.74     | hyper-methylated        | 9   | "+" | exon     | 2.28E-04  |         |
| Adh1                                | alcohol dehydrogenase 1 (class I)             | ENSRNOT00000083682                                     | 0.89               | down | 0.64 | P06757     | 0.78                | down | 2.84E-16 |          |                         |     |     |          |           |         |
| Adh1                                | alcohol dehydrogenase 1 (class I)             | MSTRG.11708.1                                          | 1                  | down | 0.97 | P06757     | 0.78                | down | 2.84E-16 |          |                         |     |     |          |           |         |
| Adh1                                | alcohol dehydrogenase 1 (class I)             | ENSRNOT00000085067                                     | 0.99               | down | 0.97 | P06757     | 0.78                | down | 2.84E-16 |          |                         |     |     |          |           |         |
| Ephx1                               | epoxide hydrolase 1, microsomal (xenobiotic)  | ENSRNOT00000085279                                     | 0.89               | down | 0.77 | P07687     | 0.69                | down | 5.24E-14 | 0.19     | hypo-methylated         | 13  | "-" | promoter | 2.92E-07  |         |
| Ephx1                               | epoxide hydrolase 1, microsomal (xenobiotic)  | ENSRNOT0000004780                                      | 0.92               | down | 0.69 | P07687     | 0.69                | down | 5.24E-14 | 0.19     | hypo-methylated         | 13  | "-" | promoter | 2.92E-07  |         |
| Gstm3                               | glutathione S-transferase mu 3                | ENSRNOT00000025800                                     | 1.01               | up   | 0.91 | P08009     | 0.59                | down | 2.02E-20 |          |                         |     |     |          |           |         |
| Aldh3a1                             | aldehyde dehydrogenase 3 family, member A1    | ENSRNOT00000003182                                     | 0.45               | down | 0.25 | P11883     | 0.72                | down | 6.70E-23 |          |                         |     |     |          |           |         |
| Gsta4                               | glutathione S-transferase alpha 4             | MSTRG.20020.1                                          | 0.78               | down | 0.48 | P14942     | 0.76                | down | 4.34E-13 |          |                         |     |     |          |           |         |
| Gsta4                               | glutathione S-transferase alpha 4             | ENSRNOT00000090146                                     | 0.88               | down | 0.55 | P14942     | 0.76                | down | 4.34E-13 |          |                         |     |     |          |           |         |
| Gsta4                               | glutathione S-transferase alpha 4             | ENSRNOT00000012348                                     | 1.17               | up   | 0.76 | P14942     | 0.76                | down | 4.34E-13 |          |                         |     |     |          |           |         |
| Gstt1                               | glutathione S-transferase theta 1             | ENSRNOT00000001669                                     | 0.92               | down | 0.8  | Q01579     | 0.80                | down | 1.36E-15 | 0.44     | hypo-methylated         | 20  | "+" | exon     | 5.43E-04  |         |
| Gstt1                               | glutathione S-transferase theta 1             | MSTRG.12200.2                                          | 0.67               | down | 0.23 | Q01579     | 0.80                | down | 1.36E-15 | 0.44     | hypo-methylated         | 20  | "+" | exon     | 5.43E-04  |         |
| Col6a5                              | collagen, type VI, alpha 5                    | ENSRNOT00000038160                                     | 0.84               | down | 0.15 | A0A0G2JTX7 | 0.69                | down | 9.0      |          |                         |     |     |          |           |         |



|                       |        |                                               |                    |      |      |      |            |      |      |          |       |                  |    |     |        |  |          |
|-----------------------|--------|-----------------------------------------------|--------------------|------|------|------|------------|------|------|----------|-------|------------------|----|-----|--------|--|----------|
|                       | Fln    | filamin C, gamma                              | ENSRNOT00000027237 | 1.11 | up   | 0.35 | A0A0H2UHR7 | 0.75 | down | 1.10E-19 |       |                  |    |     |        |  |          |
|                       | Fln    | filamin C, gamma                              | ENSRNOT00000088149 | 0.84 | down | 0.49 | A0A0H2UHR7 | 0.75 | down | 1.10E-19 |       |                  |    |     |        |  |          |
|                       | Mapk10 | mitogen activated protein kinase 10           | ENSRNOT00000092542 | 1    | down | 0.4  | A0A0U1RRS7 | 0.56 | down | 6.75E-04 | 6.77  | hyper-methylated | 14 | "+" | intron |  | 5.13E-18 |
|                       | Mapk10 | mitogen activated protein kinase 10           | ENSRNOT00000065965 | 0.99 | down | 0.41 | A0A0U1RRS7 | 0.56 | down | 6.75E-04 | 6.77  | hyper-methylated | 14 | "+" | intron |  | 5.13E-18 |
|                       | Mapk10 | mitogen activated protein kinase 10           | ENSRNOT00000092395 | 0.99 | down | 0.45 | A0A0U1RRS7 | 0.56 | down | 6.75E-04 | 6.77  | hyper-methylated | 14 | "+" | intron |  | 5.13E-18 |
|                       | Cav1   | caveolin 1                                    | ENSRNOT00000078250 | 0.54 | down | 0.07 | B1WBN8     | 0.73 | down | 8.89E-14 |       |                  |    |     |        |  |          |
|                       | Cav1   | caveolin 1                                    | MSTRG.14338.1      | 0.99 | down | 0.53 | B1WBN8     | 0.73 | down | 8.89E-14 |       |                  |    |     |        |  |          |
|                       | Myl10  | myosin, light chain 10, regulatory            | ENSRNOT00000041654 | 1.05 | up   | 0.09 | D3ZC19     | 0.76 | down | 1.15E-16 |       |                  |    |     |        |  |          |
|                       | Col6a6 | collagen, type VI, alpha 6                    | ENSRNOT00000056414 | 0.54 | down | 0.06 | D3ZL10     | 0.72 | down | 2.01E-20 |       |                  |    |     |        |  |          |
|                       | Lamb1  | laminin, beta 1                               | ENSRNOT00000008321 | 2.02 | up   | 0.49 | D3ZQN7     | 1.31 | up   | 5.36E-17 | 3.86  | hyper-methylated | 6  | "+" | intron |  | 8.86E-05 |
|                       | Lamb1  | laminin, beta 1                               | MSTRG.17232.1      | 1.22 | up   | 0.71 | D3ZQN7     | 1.31 | up   | 5.36E-17 | 3.86  | hyper-methylated | 6  | "+" | intron |  | 8.86E-05 |
|                       | Lamb1  | laminin, beta 1                               | MSTRG.17232.2      | 3.85 | up   | 0.02 | D3ZQN7     | 1.31 | up   | 5.36E-17 | 3.86  | hyper-methylated | 6  | "+" | intron |  | 8.86E-05 |
| <b>Focal adhesion</b> | Thbs4  | thrombospondin 4                              | MSTRG.10411.3      | 1.07 | up   | 0.47 | FILMS5     | 1.25 | up   | 3.66E-10 | 0.15  | hypo-methylated  | 2  | "-" | intron |  | 3.98E-04 |
|                       | Thbs4  | thrombospondin 4                              | MSTRG.10411.2      | 0.99 | down | 0.45 | FILMS5     | 1.25 | up   | 3.66E-10 | 0.15  | hypo-methylated  | 2  | "-" | intron |  | 3.98E-04 |
|                       | Thbs4  | thrombospondin 4                              | ENSRNOT00000065224 | 2.16 | up   | 0.08 | FILMS5     | 1.25 | up   | 3.66E-10 | 0.15  | hypo-methylated  | 2  | "-" | intron |  | 3.98E-04 |
|                       | Thbs4  | thrombospondin 4                              | ENSRNOT00000083531 | 2.15 | up   | 0.1  | FILMS5     | 1.25 | up   | 3.66E-10 | 0.15  | hypo-methylated  | 2  | "-" | intron |  | 3.98E-04 |
|                       | Col2a1 | collagen, type II, alpha 1                    | ENSRNOT00000086062 | 0.98 | down | 0.33 | FILRM7     | 0.58 | down | 9.54E-17 |       |                  |    |     |        |  |          |
|                       | Fn1    | fibronectin 1                                 | MSTRG.21023.11     | 8.43 | up   | 0.01 | FILST1     | 1.27 | up   | 4.07E-20 | 0.11  | hypo-methylated  | 9  | "-" | intron |  | 2.24E-04 |
|                       | Fn1    | fibronectin 1                                 | MSTRG.21023.6      | 7.56 | up   | 0.49 | FILST1     | 1.27 | up   | 4.07E-20 | 0.11  | hypo-methylated  | 9  | "-" | intron |  | 2.24E-04 |
|                       | Fn1    | fibronectin 1                                 | MSTRG.21023.9      | 0.17 | down | 0.09 | FILST1     | 1.27 | up   | 4.07E-20 | 0.11  | hypo-methylated  | 9  | "-" | intron |  | 2.24E-04 |
|                       | Fn1    | fibronectin 1                                 | ENSRNOT00000019772 | 0.52 | down | 0.62 | FILST1     | 1.27 | up   | 4.07E-20 | 0.11  | hypo-methylated  | 9  | "-" | intron |  | 2.24E-04 |
|                       | Fn1    | fibronectin 1                                 | MSTRG.21023.8      | 9.19 | up   | 0.42 | FILST1     | 1.27 | up   | 4.07E-20 | 0.11  | hypo-methylated  | 9  | "-" | intron |  | 2.24E-04 |
|                       | Fn1    | fibronectin 1                                 | MSTRG.21023.4      | 1.68 | up   | 0.61 | FILST1     | 1.27 | up   | 4.07E-20 | 0.11  | hypo-methylated  | 9  | "-" | intron |  | 2.24E-04 |
|                       | Fn1    | fibronectin 1                                 | ENSRNOT00000057585 | 1.31 | up   | 0.79 | FILST1     | 1.27 | up   | 4.07E-20 | 0.11  | hypo-methylated  | 9  | "-" | intron |  | 2.24E-04 |
|                       | Fn1    | fibronectin 1                                 | MSTRG.21023.2      | 1.2  | up   | 0.84 | FILST1     | 1.27 | up   | 4.07E-20 | 0.11  | hypo-methylated  | 9  | "-" | intron |  | 2.24E-04 |
|                       | Fn1    | fibronectin 1                                 | MSTRG.21023.3      | 1.42 | up   | 0.73 | FILST1     | 1.27 | up   | 4.07E-20 | 0.11  | hypo-methylated  | 9  | "-" | intron |  | 2.24E-04 |
|                       | Fn1    | fibronectin 1                                 | MSTRG.21023.5      | 8.58 | up   | 0.48 | FILST1     | 1.27 | up   | 4.07E-20 | 0.11  | hypo-methylated  | 9  | "-" | intron |  | 2.24E-04 |
|                       | Fn1    | fibronectin 1                                 | MSTRG.21023.10     | 9.31 | up   | 0.44 | FILST1     | 1.27 | up   | 4.07E-20 | 0.11  | hypo-methylated  | 9  | "-" | intron |  | 2.24E-04 |
|                       | Spp1   | secreted phosphoprotein 1                     | ENSRNOT00000075989 | 5.34 | up   | 0.17 | P08721     | 1.32 | up   | 5.17E-14 | 29.54 | hyper-methylated | 14 | "+" | exon   |  | 1.81E-44 |
|                       | Spp1   | secreted phosphoprotein 1                     | MSTRG.6515.2       | 4.8  | up   | 0.11 | P08721     | 1.32 | up   | 5.17E-14 | 29.54 | hyper-methylated | 14 | "+" | exon   |  | 1.81E-44 |
|                       | Spp1   | secreted phosphoprotein 1                     | ENSRNOT00000067875 | 7.36 | up   | 0.06 | P08721     | 1.32 | up   | 5.17E-14 | 29.54 | hyper-methylated | 14 | "+" | exon   |  | 1.81E-44 |
|                       | Ppp1cc | protein phosphatase 1 catalytic subunit gamma | ENSRNOT00000078761 | 1.05 | up   | 0.47 | P63088     | 0.69 | down | 9.22E-05 |       |                  |    |     |        |  |          |
|                       | Ppp1cc | protein phosphatase 1 catalytic subunit gamma | MSTRG.5563.2       | 1    | down | 0.99 | P63088     | 0.69 | down | 9.22E-05 |       |                  |    |     |        |  |          |
|                       | Ppp1cc | protein phosphatase 1 catalytic subunit gamma | ENSRNOT00000048851 | 1.05 | up   | 0.59 | P63088     | 0.69 | down | 9.22E-05 |       |                  |    |     |        |  |          |
|                       | Ppp1cc | protein phosphatase 1 catalytic subunit gamma | ENSRNOT00000083296 | 1.19 | up   | 0.26 | P63088     | 0.69 | down | 9.22E-05 |       |                  |    |     |        |  |          |
|                       | Vtn    | vitronectin                                   | ENSRNOT00000078897 | 1.01 | up   | 0.76 | Q3KR94     | 1.27 | up   | 2.27E-07 |       |                  |    |     |        |  |          |
|                       | Vtn    | vitronectin                                   | ENSRNOT00000039954 | 1.2  | up   | 0.41 | Q3KR94     | 1.27 | up   | 2.27E-07 |       |                  |    |     |        |  |          |
|                       | Col4a1 | collagen, type IV, alpha 1                    | MSTRG.8454.1       | 2.88 | up   | 0.52 | Q5FWY9     | 1.87 | up   | 1.30E-15 |       |                  |    |     |        |  |          |
|                       | Col4a1 | collagen, type IV, alpha 1                    | ENSRNOT00000057386 | 1.58 | up   | 0.25 | Q5FWY9     | 1.87 | up   | 1.30E-15 |       |                  |    |     |        |  |          |
