# Supplementary material for: Revealing the pathogenic changes of PAH based on multiomics characteristics
Source: J Transl Med. 2019 Jul 22;17:231. doi: 10.1186/s12967-019-1981-5 (PMC6647123; doi:10.1186/s12967-019-1981-5)
Supplement: Supplementary file 2 — Additional file 2: Table S2. Integrated analysis of three omics characteristics. [file 12967_2019_1981_MOESM2_ESM.pdf]

**Table S2. Integrated analysis of three omics characteristics.** Three omics correlated information, including methylation, mRNA and protein information. The fold change (FC), the significance of FC (sig-FC), the direction (dir), p value (*p*) and the significance of p value (sig-*p*) of three omics information are shown. Meanwhile, The chromosomal localization (Chr) and methylated positions (Info1-3) are also shown in methylation information. Info1-3 shows the concrete methylated locations.

**Table S2. Integrated analysis of three omics characteristics**

| Correlation                              | Methylation information |        |      |         |       |       |          |                 |       | mRNA information |        |      |      |       | protein information |        |      |         |       |
|------------------------------------------|-------------------------|--------|------|---------|-------|-------|----------|-----------------|-------|------------------|--------|------|------|-------|---------------------|--------|------|---------|-------|
| mRNA : Gene : Protein                    | FC                      | sig_FC | dir  | p       | sig_p | chr   | Info1    | Info2           | Info3 | FC               | sig_FC | dir  | p    | sig_p | FC                  | Sig_FC | dir  | p       | sig_p |
| ENSRNOT00000001916 : Serpin1 : F1LM16    | 2.28                    | yes    | up   | 2.6E-04 | yes   | chr12 | exon     | last exon       | NA    | 0.43             | yes    | down | 0.33 | no    | 1.00                | no     | down | 7.7E-01 | no    |
| ENSRNOT000000084660 : Ctnna3 : F1M4I1    | 0                       | yes    | down | 1.3E-06 | yes   | chr20 | promoter | Distal          | LCP   | 1.09             | no     | up   | 0.69 | no    | 0.92                | no     | down | 3.6E-04 | yes   |
| ENSRNOT00000076259 : Dopey2 : A0A0G2JXD9 | 3.39                    | yes    | up   | 1.3E-40 | yes   | chr11 | intron   | internal intron | NA    | 0.97             | no     | down | 0.80 | no    | 0.98                | no     | down | 3.1E-01 | no    |
| MSTRG.17118.5 : Atad2b : A0A096MKA5      | 3.51                    | yes    | up   | 9.0E-07 | yes   | chr6  | intron   | internal intron | NA    | 0.98             | no     | down | 0.28 | no    | 1.15                | no     | up   | 9.1E-06 | yes   |
| ENSRNOT00000039273 : Zc3h18 : Q6TQE1     | 0.03                    | yes    | down | 1.2E-11 | yes   | chr19 | promoter | Intermediate    | LCP   | 1.15             | no     | up   | 0.10 | no    | 1.02                | no     | up   | 2.3E-01 | no    |
| MSTRG.22038.4 : Fmr1 : Q80WE1            | inf                     | yes    | up   | 3.0E-04 | yes   | chrX  | intron   | internal intron | NA    | 1.35             | no     | up   | 0.40 | no    | 1.09                | no     | up   | 7.3E-06 | yes   |
| ENSRNOT000000048140 : Dhx8 : A0A0G2K283  | 0.28                    | yes    | down | 3.7E-05 | yes   | chr10 | intron   | internal intron | NA    | 0.99             | no     | down | 0.59 | no    | 0.94                | no     | down | 1.2E-01 | no    |
| ENSRNOT00000030065 : Tmem62 : D3ZIW4     | 0.44                    | yes    | down | 9.9E-05 | yes   | chr3  | exon     | last exon       | NA    | 2.42             | yes    | up   | 0.22 | no    | 1.03                | no     | up   | 1.0E-01 | no    |
| MSTRG.2596.6 : Gbfl : A0A0G2K3N1         | 0.28                    | yes    | down | 1.1E-05 | yes   | chr1  | intron   | internal intron | NA    | 1.00             | no     | down | 0.40 | no    | 1.05                | no     | up   | 6.1E-10 | yes   |
| MSTRG.21909.1 : Acs14 : O35547           | 0.19                    | yes    | down | 1.2E-04 | yes   | chrX  | intron   | internal intron | NA    | 1.08             | no     | up   | 0.77 | no    | 1.22                | yes    | up   | 2.0E-10 | yes   |
| MSTRG.3645.2 : Slnf13 : A0A096MKD0       | 2.27                    | yes    | up   | 1.5E-04 | yes   | chr10 | promoter | Intermediate    | LCP   | 1.29             | no     | up   | 0.60 | no    | 0.97                | no     | down | 2.7E-02 | yes   |
| MSTRG.21491.5 : Phf8 : D4AD31            | 0                       | yes    | down | 2.1E-07 | yes   | chrX  | exon     | first exon      | NA    | 1.53             | no     | up   | 0.44 | no    | 1.13                | no     | up   | 3.6E-02 | yes   |
| MSTRG.7561.2 : Phf11b : M0RB46           | 3.03                    | yes    | up   | 2.9E-04 | yes   | chr15 | promoter | Intermediate    | LCP   | 2.06             | yes    | up   | 0.22 | no    | 1.15                | no     | up   | 2.3E-06 | yes   |
| MSTRG.8345.6 : Fgfr1 : F1LM54            | 0.22                    | yes    | down | 3.0E-05 | yes   | chr16 | exon     | last exon       | NA    | 1.19             | no     | up   | 0.69 | no    | 1.05                | no     | up   | 1.3E-02 | yes   |
| ENSRNOT00000023418 : Lrba : A0A0G2JYI0   | 10.95                   | yes    | up   | 4.8E-12 | yes   | chr2  | intron   | internal intron | NA    | 1.00             | no     | down | 0.99 | no    | 0.94                | no     | down | 4.5E-07 | yes   |
| MSTRG.16232.1 : Hectd3 : F1LVZ9          | 3.28                    | yes    | up   | 3.1E-04 | yes   | chr5  | intron   | internal intron | NA    | 0.91             | no     | down | 0.89 | no    | 0.99                | no     | down | 6.3E-01 | no    |
| MSTRG.19735.1 : Atm : A0A0G2K3I0         | 0.65                    | yes    | down | 2.4E-04 | yes   | chr8  | intron   | internal intron | NA    | 1.01             | no     | up   | 0.48 | no    | 1.01                | no     | up   | 4.6E-01 | no    |
| ENSRNOT00000032248 : Tek : D3ZCD0        | inf                     | yes    | up   | 4.6E-07 | yes   | chr5  | intron   | internal intron | NA    | 0.69             | no     | down | 0.11 | no    | 0.98                | no     | down | 7.9E-02 | no    |
| MSTRG.10517.3 : Erbin : M0R9T2           | 3.86                    | yes    | up   | 2.1E-05 | yes   | chr2  | intron   | last intron     | NA    | 2.20             | yes    | up   | 0.02 | yes   | 0.94                | no     | down | 3.9E-05 | yes   |
| MSTRG.18046.3 : Pan2 : R9PXX6            | 2.14                    | yes    | up   | 4.2E-04 | yes   | chr7  | exon     | internal exon   | NA    | 1.17             | no     | up   | 0.56 | no    | 0.84                | no     | down | 1.2E-03 | yes   |
| ENSRNOT00000077020 : Synm : G3V9G5       | 1.68                    | yes    | up   | 3.0E-04 | yes   | chr1  | exon     | last exon       | NA    | 0.99             | no     | down | 0.50 | no    | 0.82                | yes    | down | 8.8E-13 | yes   |
| MSTRG.18723.2 : Deptor : F1M8Y4          | 2.15                    | yes    | up   | 9.9E-15 | yes   | chr7  | intron   | internal intron | NA    | 0.69             | no     | down | 0.58 | no    | 0.97                | no     | down | 2.0E-01 | no    |
| MSTRG.12668.4 : Nup188 : F1LRC6          | 0.22                    | yes    | down | 2.3E-05 | yes   | chr3  | exon     | internal exon   | NA    | 0.68             | no     | down | 0.25 | no    | 1.02                | no     | up   | 1.9E-01 | no    |
| MSTRG.8278.26 : Rbpms : F2Z3S5           | 0.02                    | yes    | down | 2.6E-05 | yes   | chr16 | promoter | Proximal        | ICP   | 1.12             | no     | up   | 0.41 | no    | 1.06                | no     | up   | 4.9E-05 | yes   |
| MSTRG.16640.7 : Arhgef101 : M0R7W2       | 2.87                    | yes    | up   | 9.9E-07 | yes   | chr5  | intron   | internal intron | NA    | 0.50             | yes    | down | 0.51 | no    | 1.13                | no     | up   | 8.4E-04 | yes   |
| ENSRNOT00000055875 : Anapc1 : F1M801     | 0.25                    | yes    | down | 6.5E-11 | yes   | chr3  | intron   | internal intron | NA    | 2.17             | yes    | up   | 0.36 | no    | 1.00                | no     | down | 5.4E-01 | no    |
| MSTRG.20743.1 : Dst : D3ZC56             | 0.35                    | yes    | down | 1.3E-05 | yes   | chr9  | intron   | internal intron | NA    | 1.01             | no     | up   | 0.91 | no    | 1.03                | no     | up   | 7.3E-04 | yes   |
| MSTRG.14342.2 : ST7 : A0A0G2KBB5         | 4.88                    | yes    | up   | 1.5E-16 | yes   | chr4  | promoter | Distal          | LCP   | 0.90             | no     | down | 0.52 | no    | 1.14                | no     | up   | 1.4E-03 | yes   |
| MSTRG.20927.3 : Aox1 : F1LRQ1            | 0.36                    | yes    | down | 1.5E-07 | yes   | chr9  | intron   | internal intron | NA    | 0.76             | no     | down | 0.15 | no    | 0.73                | yes    | down | 3.5E-17 | yes   |
| ENSRNOT000000093546 : Mycbp2 : D4A2D3    | 0.31                    | yes    | down | 9.2E-06 | yes   | chr15 | intron   | internal intron | NA    | 1.00             | no     | down | 0.48 | no    | 1.00                | no     | up   | 6.8E-01 | no    |
| MSTRG.21039.3 : Tns1 : F1LN42            | 0.09                    | yes    | down | 2.0E-04 | yes   | chr9  | intron   | last intron     | NA    | 2.78             | yes    | up   | 0.33 | no    | 0.86                | no     | down | 7.8E-19 | yes   |
| MSTRG.18368.1 : Nt5dc3 : D3ZAI6          | 1.55                    | yes    | up   | 4.2E-07 | yes   | chr7  | intron   | internal intron | NA    | 0.61             | no     | down | 0.49 | no    | 1.05                | no     | up   | 2.5E-05 | yes   |
| MSTRG.6191.4 : Ddr2 : B1WC09             | 0.49                    | yes    | down | 3.3E-05 | yes   | chr13 | exon     | internal exon   | NA    | 1.63             | no     | up   | 0.60 | no    | 0.95                | no     | down | 3.2E-01 | no    |
| ENSRNOT000000093263 : Atp6v1a : D4A133   | 0.36                    | yes    | down | 7.3E-06 | yes   | chr11 | intron   | internal intron | NA    | 1.06             | no     | up   | 0.48 | no    | 1.08                | no     | up   | 1.1E-08 | yes   |
| MSTRG.10847.3 : Gnb4 : O35353            | 2.44                    | yes    | up   | 1.4E-05 | yes   | chr2  | intron   | last intron     | NA    | 1.01             | no     | up   | 0.97 | no    | 0.91                | no     | down | 2.4E-06 | yes   |
| MSTRG.20352.15 : Ubp1 : D4A030           | 0.44                    | yes    | down | 2.3E-04 | yes   | chr8  | intron   | internal intron | NA    | 0.87             | no     | down | 0.40 | no    | 0.98                | no     | down | 1.9E-01 | no    |
| MSTRG.7964.1 : Bmpr1a : Q78EA7           | 0.29                    | yes    | down | 2.1E-04 | yes   | chr16 | intron   | internal intron | NA    | 1.12             | no     | up   | 0.67 | no    | 0.90                | no     | down | 9.8E-10 | yes   |
| ENSRNOT00000012829 : Tfe3 : D3ZAW6       | 0.07                    | yes    | down | 2.9E-11 | yes   | chrX  | exon     | last exon       | NA    | 0.93             | no     | down | 0.71 | no    | 1.04                | no     | up   | 1.6E-03 | yes   |
| ENSRNOT000000044158 : Casc4 : D3ZW58     | 0.14                    | yes    | down | 1.2E-10 | yes   | chr3  | intron   | first intron    | NA    | 0.59             | no     | down | 0.10 | no    | 1.03                | no     | up   | 1.3E-02 | yes   |
| MSTRG.6480.4 : Evi5 : D3ZJN9             | 4.04                    | yes    | up   | 4.0E-04 | yes   | chr14 | intron   | internal intron | NA    | 2.31             | yes    | up   | 0.12 | no    | 0.98                | no     | down | 2.5E-01 | no    |
| ENSRNOT00000028592 : Men1 : Q9WVR8       | 4.89                    | yes    | up   | 3.4E-06 | yes   | chr1  | exon     | last exon       | NA    | 0.62             | no     | down | 0.11 | no    | 1.06                | no     | up   | 2.0E-04 | yes   |
| ENSRNOT00000091264 : Snx17 : Q6AYS6      | 0.27                    | yes    | down | 1.2E-11 | yes   | chr6  | intron   | internal intron | NA    | 0.87             | no     | down | 0.26 | no    | 0.99                | no     | down | 1.5E-01 | no    |
| MSTRG.5025.2 : Pds5b : D3ZU56            | 0.26                    | yes    | down | 2.1E-04 | yes   | chr12 | promoter | Intermediate    | LCP   | 1.27             | no     | up   | 0.09 | no    | 0.96                | no     | down | 4.7E-06 | yes   |
| MSTRG.18206.5 : Cirbp : P60825           | 0.73                    | yes    | down | 1.3E-04 | yes   | chr7  | exon     | first exon      | NA    | 1.51             | no     | up   | 0.11 | no    | 0.85                | no     | down | 3.4E-16 | yes   |
| ENSRNOT00000060868 : Bmp2k : Q3SYQ0      | 11.81                   | yes    | up   | 5.6E-07 | yes   | chr14 | intron   | internal intron | NA    | 0.91             | no     | down | 0.28 | no    | 1.19                | no     | up   | 6.4E-09 | yes   |
| MSTRG.7470.17 : Acin1 : E9PST5           | 0.30                    | yes    | down | 1.1E-04 | yes   | chr15 | promoter | Distal          | LCP   | 0.69             | no     | down |      |       |                     |        |      |         |       |

|                                         |       |     |      |         |     |       |          |                 |     |      |     |      |      |     |      |     |      |         |     |
|-----------------------------------------|-------|-----|------|---------|-----|-------|----------|-----------------|-----|------|-----|------|------|-----|------|-----|------|---------|-----|
| MSTRG.11985.3 : Vars : Q04462           | 4.99  | yes | up   | 5.5E-05 | yes | chr20 | intron   | internal intron | NA  | 1.71 | no  | up   | 0.09 | no  | 1.01 | no  | up   | 2.1E-04 | yes |
| ENSRNOT00000083955 : Fkbp11 : G3V7V5    | inf   | yes | up   | 4.7E-06 | yes | chr7  | intron   | internal intron | NA  | 0.93 | no  | down | 0.83 | no  | 1.06 | no  | up   | 1.6E-07 | yes |
| MSTRG.1427.1 : Arhgef17 : A0A0G2JXT9    | 0.45  | yes | down | 6.0E-05 | yes | chr1  | exon     | last exon       | NA  | 1.32 | no  | up   | 0.41 | no  | 0.93 | no  | down | 3.1E-10 | yes |
| MSTRG.6733.1 : Limch1 : F1M392          | 1.09  | no  | up   | 3.3E-04 | yes | chr14 | intron   | last intron     | NA  | 0.81 | no  | down | 0.48 | no  | 0.85 | no  | down | 1.1E-13 | yes |
| MSTRG.4038.2 : Pled3 : D4A978           | inf   | yes | up   | 1.4E-05 | yes | chr10 | promoter | Distal          | LCP | 0.48 | yes | down | 0.40 | no  | 0.86 | no  | down | 2.9E-08 | yes |
| ENSRNOT00000092021 : Myo1g : A0A0G2K6E3 | 0.66  | yes | down | 3.2E-12 | yes | chr14 | intron   | internal intron | NA  | 1.50 | no  | up   | 0.28 | no  | 1.04 | no  | up   | 3.4E-02 | yes |
| ENSRNOT00000048418 : Ubtf : P25977      | 1.48  | yes | up   | 1.5E-06 | yes | chr10 | intron   | internal intron | NA  | 1.62 | no  | up   | 0.20 | no  | 0.96 | no  | down | 1.4E-06 | yes |
| MSTRG.13558.1 : Siglec1 : A0A0G2K320    | 0.24  | yes | down | 6.2E-06 | yes | chr3  | promoter | Proximal        | LCP | 1.85 | no  | up   | 0.01 | yes | 1.25 | yes | up   | 7.1E-13 | yes |
| MSTRG.5467.1 : Stx2 : Q7TS57            | 4.45  | yes | up   | 6.0E-04 | yes | chr12 | exon     | last exon       | NA  | 1.36 | no  | up   | 0.03 | yes | 0.91 | no  | down | 2.6E-04 | yes |
| MSTRG.18481.1 : Zdhhc17 : E9PTT0        | 5.08  | yes | up   | 4.0E-04 | yes | chr7  | intron   | internal intron | NA  | 0.48 | yes | down | 0.09 | no  | 0.94 | no  | down | 1.6E-01 | no  |
| MSTRG.7561.1 : Phf11b : M0RB46          | 3.03  | yes | up   | 2.9E-04 | yes | chr15 | promoter | Intermediate    | LCP | 0.99 | no  | down | 0.97 | no  | 1.15 | no  | up   | 2.3E-06 | yes |
| ENSRNOT00000093318 : Cln5 : A0A1W2Q672  | 0.33  | yes | down | 1.1E-04 | yes | chr15 | intron   | first intron    | NA  | 1.01 | no  | up   | 0.95 | no  | 1.04 | no  | up   | 3.7E-01 | no  |
| MSTRG.8717.2 : Mcur1 : D3ZEJ2           | 0.10  | yes | down | 2.2E-05 | yes | chr17 | promoter | Distal          | LCP | 1.42 | no  | up   | 0.14 | no  | 0.92 | no  | down | 1.0E-11 | yes |
| ENSRNOT00000030825 : Ncbp1 : Q56A27     | 0.31  | yes | down | 1.1E-07 | yes | chr5  | intron   | internal intron | NA  | 1.09 | no  | up   | 0.50 | no  | 1.00 | no  | up   | 9.4E-01 | no  |
| MSTRG.15089.5 : Csgalnact2 : D4A5Z0     | 2.74  | yes | up   | 6.9E-07 | yes | chr4  | intron   | internal intron | NA  | 1.01 | no  | up   | 0.94 | no  | 0.94 | no  | down | 1.2E-02 | yes |
| MSTRG.2579.2 : Sfxn3 : Q9JHY2           | 0.39  | yes | down | 7.8E-05 | yes | chr1  | intron   | internal intron | NA  | 0.37 | yes | down | 0.20 | no  | 0.98 | no  | down | 7.5E-03 | yes |
| ENSRNOT00000039836 : Psmc3 : Q5U2S7     | 0.29  | yes | down | 4.3E-04 | yes | chr10 | intron   | internal intron | NA  | 0.98 | no  | down | 0.33 | no  | 0.96 | no  | down | 1.8E-06 | yes |
| MSTRG.21273.1 : Fer : A0A140TAC4        | 3.31  | yes | up   | 2.7E-04 | yes | chr9  | promoter | Proximal        | LCP | 0.72 | no  | down | 0.04 | yes | 0.92 | no  | down | 7.3E-07 | yes |
| ENSRNOT00000076602 : Aco2 : Q9ER34      | 0     | yes | down | 2.0E-04 | yes | chr7  | promoter | Distal          | ICP | 1.07 | no  | up   | 0.35 | no  | 0.90 | no  | down | 5.3E-13 | yes |
| MSTRG.5482.13 : Ncor2 : A0A0G2JU91      | 2.16  | yes | up   | 1.6E-06 | yes | chr12 | intron   | internal intron | NA  | 1.05 | no  | up   | 0.93 | no  | 1.01 | no  | up   | 7.1E-01 | no  |
| MSTRG.8033.5 : Slc27a1 : Q6GMM8         | 0.26  | yes | down | 5.6E-15 | yes | chr16 | intron   | internal intron | NA  | 0.65 | no  | down | 0.03 | yes | 0.99 | no  | down | 2.5E-01 | no  |
| ENSRNOT00000093052 : Picalm : Q66WT9    | 8.74  | yes | up   | 2.1E-13 | yes | chr1  | intron   | internal intron | NA  | 1.05 | no  | up   | 0.84 | no  | 1.45 | yes | up   | 1.6E-10 | yes |
| ENSRNOT00000077125 : Sbf2 : B5DEJ9      | 4.77  | yes | up   | 8.9E-06 | yes | chr1  | intron   | internal intron | NA  | 1.01 | no  | up   | 0.23 | no  | 1.03 | no  | up   | 9.5E-02 | no  |
| MSTRG.21175.2 : Inpp5d : F1M981         | 0.08  | yes | down | 9.9E-05 | yes | chr9  | intron   | internal intron | NA  | 0.65 | no  | down | 0.05 | yes | 1.08 | no  | up   | 3.1E-05 | yes |
| MSTRG.9278.2 : Ercc3 : Q4G005           | 0.04  | yes | down | 1.2E-04 | yes | chr18 | promoter | Intermediate    | ICP | 1.45 | no  | up   | 0.32 | no  | 0.97 | no  | down | 5.7E-03 | yes |
| ENSRNOT00000082723 : Itp1 : A0A0A0MY31  | 3.16  | yes | up   | 1.1E-05 | yes | chr4  | promoter | internal intron | NA  | 0.87 | no  | down | 0.43 | no  | 0.87 | no  | down | 1.1E-14 | yes |
| ENSRNOT00000017211 : Tm9sf2 : Q66HG5    | 0.39  | yes | down | 9.3E-05 | yes | chr15 | intron   | last intron     | NA  | 0.74 | no  | down | 0.47 | no  | 1.03 | no  | up   | 6.1E-04 | yes |
| ENSRNOT00000028793 : Txnip : Q5M7W1     | 6.38  | yes | up   | 4.0E-07 | yes | chr2  | exon     | internal exon   | NA  | 0.57 | no  | down | 0.00 | yes | 0.85 | no  | down | 1.0E-06 | yes |
| MSTRG.7186.5 : Sptbn1 : A0A0G2K8W9      | 5.72  | yes | up   | 4.0E-04 | yes | chr14 | intron   | internal intron | NA  | 0.21 | yes | down | 0.40 | no  | 0.87 | no  | down | 1.1E-18 | yes |
| MSTRG.15715.2 : Dnajb5 : D3ZB76         | 0.05  | yes | down | 2.8E-05 | yes | chr5  | promoter | Distal          | ICP | 1.12 | no  | up   | 0.76 | no  | 1.02 | no  | up   | 2.3E-01 | no  |
| MSTRG.877.5 : Lsm14a : A0A0G2JUK2       | 0.31  | yes | down | 3.8E-04 | yes | chr1  | intron   | last intron     | NA  | 2.42 | yes | up   | 0.11 | no  | 1.02 | no  | up   | 2.8E-01 | no  |
| MSTRG.6818.2 : Rbpj : M0RK7Q3           | 0.34  | yes | down | 7.0E-05 | yes | chr14 | intron   | last intron     | NA  | 1.93 | no  | up   | 0.32 | no  | 1.08 | no  | up   | 1.1E-04 | yes |
| MSTRG.12910.1 : Golga1 : D4A6K4         | 0.04  | yes | down | 1.1E-04 | yes | chr3  | intron   | internal intron | NA  | 1.00 | no  | down | 0.99 | no  | 1.12 | no  | up   | 8.2E-05 | yes |
| ENSRNOT00000011330 : Decr1 : G3V734     | 0.34  | yes | down | 2.6E-06 | yes | chr5  | exon     | internal exon   | NA  | 0.90 | no  | down | 0.48 | no  | 0.84 | no  | down | 1.9E-13 | yes |
| MSTRG.1446.1 : Fofr2 : D4A4S5           | 0.21  | yes | down | 8.7E-05 | yes | chr1  | promoter | Distal          | LCP | 1.43 | no  | up   | 0.15 | no  | 1.42 | yes | up   | 6.4E-18 | yes |
| MSTRG.13734.2 : Bpifb1 : A0JPN3         | 1.80  | yes | up   | 3.8E-07 | yes | chr3  | intron   | internal intron | NA  | 0.42 | yes | down | 0.32 | no  | 0.76 | yes | down | 2.7E-18 | yes |
| MSTRG.10153.7 : Cmp1 : A0A0G2JYB9       | 0.58  | yes | down | 9.9E-05 | yes | chr19 | intron   | internal intron | NA  | 0.49 | yes | down | 0.26 | no  | 0.89 | no  | down | 2.1E-04 | yes |
| ENSRNOT00000081110 : Adam17 : G3V711    | 0.27  | yes | down | 3.8E-13 | yes | chr6  | intron   | internal intron | NA  | 1.20 | no  | up   | 0.07 | no  | 1.00 | no  | down | 9.2E-01 | yes |
| MSTRG.3866.1 : Srcin1 : Q9QXY2          | 3.06  | yes | up   | 2.8E-04 | yes | chr10 | intron   | last intron     | NA  | 1.31 | no  | up   | 0.12 | no  | 1.05 | no  | up   | 1.2E-02 | yes |
| MSTRG.1731.4 : Tbcd10b : D3ZSY8         | 1.59  | yes | up   | 2.7E-04 | yes | chr1  | intron   | internal intron | NA  | 1.33 | no  | up   | 0.65 | no  | 0.99 | no  | down | 3.1E-01 | no  |
| ENSRNOT00000092837 : Trim21 : D4ACF2    | 0.20  | yes | down | 5.7E-10 | yes | chr1  | promoter | Distal          | LCP | 1.27 | no  | up   | 0.11 | no  | 0.96 | no  | down | 1.3E-04 | yes |
| MSTRG.7350.12 : Ktn1 : D4A4Z9           | 2.49  | yes | up   | 1.2E-04 | yes | chr15 | intron   | internal intron | NA  | 1.02 | no  | up   | 0.71 | no  | 1.04 | no  | up   | 2.2E-11 | yes |
| MSTRG.9334.1 : Tmem173 : F1M391         | inf   | yes | up   | 7.6E-06 | yes | chr18 | intron   | last intron     | NA  | 0.95 | no  | down | 0.76 | no  | 1.18 | no  | up   | 2.5E-10 | yes |
| ENSRNOT00000061513 : Clasp1 : F1LNR1    | 0.36  | yes | down | 6.7E-07 | yes | chr13 | intron   | internal intron | NA  | 0.98 | no  | down | 0.14 | no  | 1.00 | no  | down | 7.0E-01 | no  |
| MSTRG.20352.17 : Ubp1 : D4A030          | 0.44  | yes | down | 2.3E-04 | yes | chr8  | intron   | internal intron | NA  | 1.38 | no  | up   | 0.07 | no  | 0.98 | no  | down | 1.9E-01 | no  |
| ENSRNOT00000076823 : Aco2 : Q9ER34      | 0     | yes | down | 2.0E-04 | yes | chr7  | promoter | Distal          | ICP | 0.98 | no  | down | 0.90 | no  | 0.90 | no  | down | 5.3E-13 | yes |
| ENSRNOT00000077044 : Asph : A0A096MKE0  | 2.56  | yes | up   | 9.8E-06 | yes | chr5  | intron   | internal intron | NA  | 1.16 | no  | up   | 0.10 | no  | 0.99 | no  | down | 1.3E-01 | no  |
| ENSRNOT00000058685 : Sin3a : A0A0G2K3H5 | 0.53  | yes | down | 4.1E-06 | yes | chr8  | intron   | last intron     | NA  | 0.98 | no  | down | 0.47 | no  | 0.96 | no  | down | 6.2E-05 | yes |
| MSTRG.8278.35 : Rbpms : F2Z3S5          | 0.02  | yes | down | 2.6E-05 | yes | chr16 | promoter | Proximal        | ICP | 1.14 | no  | up   | 0.14 | no  | 1.06 | no  | up   | 4.9E-05 | yes |
| MSTRG.10411.3 : Thbs4 : F1LMS5          | 0.15  | yes | down | 4.0E-04 | yes | chr2  | intron   | internal intron | NA  | 1.07 | no  | up   | 0.47 | no  | 1.25 | yes | up   | 3.7E-10 | yes |
| MSTRG.18670.3 : Ubr5 : H9KVE3           | 4.26  | yes | up   | 2.2E-04 | yes | chr7  | intron   | first intron    | NA  | 0.87 | no  | down | 0.46 | no  | 0.94 | no  | down | 3.0E-02 | yes |
| ENSRNOT00000003314 : Serpinb10 : G3V6B2 | 0.43  | yes | down | 3.2E-05 | yes | chr13 | promoter | Distal          | LCP | 0.84 | no  | down | 0.17 | no  | 1.30 | yes | up   | 1.6E-14 | yes |
| MSTRG.9650.1 : Hdhd2 : Q6QI86           | 0.20  | yes | down | 5.1E-06 | yes | chr18 | intron   | first intron    | NA  | 0.79 | no  | down | 0.55 | no  | 1.04 | no  | up   | 3.3E-03 | yes |
| MSTRG.18670.1 : Ubr5 : H9KVE3           | 4.26  | yes | up   | 2.2E-04 | yes | chr7  | intron   | first intron    | NA  | 2.54 | yes | up   | 0.25 | no  | 0.94 | no  | down | 3.0E-02 | yes |
| ENSRNOT00000020775 : Ces1f : M0R7R1     | 0.26  | yes | down | 2.8E-08 | yes | chr19 | intron   | internal intron | NA  | 1.00 | no  | down | 0.75 | no  | 0.86 | no  | down | 3.2E-11 | yes |
| MSTRG.1443.13 : Arap1 : F1LM60          | 2.71  | yes | up   | 3.3E-04 | yes | chr1  | intron   | first intron    | NA  | 1.06 | no  | up   | 0.85 | no  | 0.99 | no  | down | 2.5E-02 | yes |
| MSTRG.14960.3 : Eogt : Q5NDL0           | 6.71  | yes | up   | 1.7E-04 | yes | chr4  | intron   | internal intron | NA  | 1.53 | no  | up   | 0.32 | no  | 1.10 | no  | up   | 2.0E-05 | yes |
| MSTRG.3645.10 : Slfn13 : A0A096MKD0     | 2.27  | yes | up   | 1.5E-04 | yes | chr10 | promoter | Intermediate    | LCP | 1.50 | no  | up   | 0.49 | no  | 0.97 | no  | down | 2.7E-02 | yes |
| ENSRNOT00000081150 : Slc35a1 : D3ZZ48   | 0.47  | yes | down | 4.9E-04 | yes | chr5  | exon     | internal exon   | NA  | 1.05 | no  | up   | 0.67 | no  | 1.00 | no  | up   | 9.2E-01 | no  |
| MSTRG.5482.7 : Ncor2 : A0A0G2JU91       | 2.16  | yes | up   | 1.6E-06 | yes | chr12 | intron   | internal intron | NA  | 1.57 | no  | up   | 0.48 | no  | 1.01 | no  | up   | 7.1E-01 | no  |
| MSTRG.5398.1 : Eln : Q99372             | 3.55  | yes | up   | 3.0E-04 | yes | chr12 | intron   | internal intron | NA  | 0.52 | no  | down | 0.17 | no  | 0.82 | yes | down | 3.9E-08 | yes |
| ENSRNOT00000014552 : Thbs2 : D4A2G6     | 1.43  | yes | up   | 1.4E-19 | yes | chr1  | intron   | internal intron | NA  | 1.80 | no  | up   | 0.06 | no  | 1.17 | no  | up   | 2.2E-05 | yes |
| MSTRG.19895.7 : Haed3 : D4ABI7          | 0.11  | yes | down | 1.7E-06 | yes | chr8  | intron   | internal intron | NA  | 1.06 | no  | up   | 0.47 | no  | 1.02 | no  | up   | 6.2E-05 | yes |
| MSTRG.877.2 : Lsm14a : A0A0G2JUK2       | 0.31  | yes | down | 3.8E-04 | yes | chr1  | intron   | last intron     | NA  | 0.48 | yes | down | 0.22 | no  | 1.02 | no  | up   | 2.8E-01 | no  |
| MSTRG.5417.5 : Aut5 : F1M388            | 0.04  | yes | down | 4.8E-14 | yes | chr12 | intron   | internal intron | NA  | 1.17 | no  | up   | 0.51 | no  | 1.01 | no  | up   | 5.6E-01 | no  |
| ENSRNOT00000027685 : Stim1 : P84903     | 2.61  | yes | up   | 1.3E-04 | yes | chr1  | exon     | last exon       | NA  | 0.93 | no  | down | 0.66 | no  | 0.92 | no  | down | 3.4E-08 | yes |
| ENSRNOT00000061054 : Lims2 : A0A0G2KAE1 | 0.67  | yes | down | 6.6E-13 | yes | chr18 | intron   | internal intron | NA  | 0.58 | no  | down | 0.10 | no  | 0.82 | yes | down | 4.4E-10 | yes |
| MSTRG.6713.9 : Fryl : D3ZQY4            | 2.76  | yes | up   | 1.7E-04 | yes | chr14 | intron   | internal intron | NA  | 0.65 | no  | down | 0.18 | no  | 1.00 | no  | down | 4.6E-01 | no  |
| ENSRNOT00000003992 : Tsr1 : D3ZEM8      | 45.59 | yes | up   | 3.4E-04 | yes | chr10 | intron   | internal intron | NA  | 1.35 | no  | up   | 0.20 | no  | 1.00 | no  | down | 9.7E-01 | no  |
| ENSRNOT000000037115 : Golim4 : Q5BJK8   | 0.34  | yes | down | 3.2E-04 | yes | chr2  | intron   | internal intron | NA  | 0.88 | no  | down | 0.60 | no  | 1.06 | no  | up   | 1.6E-03 | yes |
| MSTRG.3781.1 : Luc7l3 : D3ZFB2          | 0.31  | yes | down | 4.3E-04 | yes | chr10 | intron   | internal intron | NA  | 1.0  |     |      |      |     |      |     |      |         |     |

|                                          |       |     |      |         |     |       |          |                 |     |      |     |      |      |     |      |     |      |         |     |
|------------------------------------------|-------|-----|------|---------|-----|-------|----------|-----------------|-----|------|-----|------|------|-----|------|-----|------|---------|-----|
| MSTRG.6635.5 : Rufy3 : A0A0G2K6A9        | 2.37  | yes | up   | 3.9E-04 | yes | chr14 | promoter | Distal          | LCP | 1.34 | no  | up   | 0.20 | no  | 1.11 | no  | up   | 1.3E-05 | yes |
| ENSRNOT00000078820 : Gas7 : M0R4R4       | 4.60  | yes | up   | 4.0E-11 | yes | chr10 | intron   | first intron    | NA  | 0.49 | yes | down | 0.22 | no  | 1.22 | yes | up   | 2.5E-15 | yes |
| ENSRNOT00000092029 : Hdac7 : A0A0G2K6B1  | 1.57  | yes | up   | 6.8E-05 | yes | chr7  | intron   | internal intron | NA  | 1.11 | no  | up   | 0.70 | no  | 0.99 | no  | down | 6.7E-01 | no  |
| ENSRNOT00000077878 : Mon2 : D3ZCG3       | 0.07  | yes | down | 1.5E-08 | yes | chr7  | intron   | internal intron | NA  | 1.01 | no  | up   | 0.47 | no  | 1.05 | no  | up   | 7.1E-07 | yes |
| MSTRG.659.3 : Cic : D4A853               | 4.32  | yes | up   | 3.8E-07 | yes | chr1  | exon     | internal exon   | NA  | 1.06 | no  | up   | 0.83 | no  | 1.06 | no  | up   | 4.3E-02 | yes |
| MSTRG.10411.2 : Thbs4 : F1LMS5           | 0.15  | yes | down | 4.0E-04 | yes | chr2  | intron   | internal intron | NA  | 0.99 | no  | down | 0.45 | no  | 1.25 | yes | up   | 3.7E-10 | yes |
| ENSRNOT00000064932 : Dnmt1 : D3ZS06      | 0.16  | yes | down | 6.3E-05 | yes | chr8  | intron   | internal intron | NA  | 1.11 | no  | up   | 0.45 | no  | 1.00 | no  | down | 4.1E-01 | no  |
| ENSRNOT00000049967 : Atr : D3Z822        | 0.06  | yes | down | 2.6E-04 | yes | chr8  | intron   | internal intron | NA  | 1.11 | no  | up   | 0.39 | no  | 1.05 | no  | up   | 1.7E-08 | yes |
| MSTRG.22064.7 : Arhgap4 : A0A0G2JVF0     | 0.34  | yes | down | 1.4E-05 | yes | chrX  | intron   | internal intron | NA  | 0.93 | no  | down | 0.88 | no  | 1.07 | no  | up   | 7.1E-04 | yes |
| ENSRNOT00000075989 : Spp1 : P08721       | 29.54 | yes | up   | 1.8E-44 | yes | chr14 | exon     | last exon       | NA  | 5.34 | yes | up   | 0.17 | no  | 1.32 | yes | up   | 5.2E-14 | yes |
| MSTRG.5025.6 : Pds5b : D3ZU56            | 0.26  | yes | down | 2.1E-04 | yes | chr12 | promoter | Intermediate    | LCP | 0.73 | no  | down | 0.31 | no  | 0.96 | no  | down | 4.7E-06 | yes |
| MSTRG.16606.3 : Alp1 : P08289            | 0.52  | yes | down | 2.4E-04 | yes | chr5  | promoter | Intermediate    | LCP | 5.15 | yes | up   | 0.02 | yes | 1.00 | no  | down | 6.2E-01 | no  |
| MSTRG.18043.4 : Stat2 : Q5XJ26           | 0.06  | yes | down | 1.0E-04 | yes | chr7  | promoter | Distal          | LCP | 0.78 | no  | down | 0.53 | no  | 1.14 | no  | up   | 1.9E-09 | yes |
| MSTRG.16523.1 : Arid1a : D4A3E3          | 0.22  | yes | down | 1.1E-04 | yes | chr5  | intron   | first intron    | NA  | 1.83 | no  | up   | 0.50 | no  | 1.00 | no  | down | 2.1E-01 | no  |
| ENSRNOT00000000142 : Dnajb5 : D3ZB76     | 0.05  | yes | down | 2.8E-05 | yes | chr5  | promoter | Distal          | ICP | 1.01 | no  | up   | 0.24 | no  | 1.02 | no  | up   | 2.3E-01 | no  |
| MSTRG.11091.3 : Gucyl3 : P19686          | 0.26  | yes | down | 3.9E-06 | yes | chr2  | intron   | internal intron | NA  | 0.63 | no  | down | 0.50 | no  | 0.85 | no  | down | 1.4E-12 | yes |
| MSTRG.8815.1 : Dcdc2 : D3ZR10            | 5.48  | yes | up   | 1.6E-11 | yes | chr17 | exon     | last exon       | NA  | 1.03 | no  | up   | 0.92 | no  | 0.87 | no  | down | 5.6E-02 | no  |
| MSTRG.16317.3 : Cap1 : Q08163            | 0.21  | yes | down | 1.6E-07 | yes | chr5  | intron   | internal intron | NA  | 2.19 | yes | up   | 0.01 | yes | 0.94 | no  | down | 1.0E-08 | yes |
| MSTRG.4725.3 : Kalrn : P97924            | 1.54  | yes | up   | 9.1E-07 | yes | chr11 | exon     | last exon       | NA  | 1.36 | no  | up   | 0.15 | no  | 1.04 | no  | up   | 1.6E-04 | yes |
| MSTRG.5467.3 : Stx2 : Q7TS57             | 4.45  | yes | up   | 6.0E-04 | yes | chr12 | exon     | last exon       | NA  | 1.00 | no  | down | 0.99 | no  | 0.91 | no  | down | 2.6E-04 | yes |
| ENSRNOT00000076676 : Parp4 : A0A096MK99  | 1.23  | yes | up   | 1.1E-06 | yes | chr15 | intron   | last intron     | NA  | 1.05 | no  | up   | 0.37 | no  | 0.94 | no  | down | 4.1E-06 | yes |
| MSTRG.5398.1 : Eln : A0A0G2JST5          | 3.55  | yes | up   | 3.0E-04 | yes | chr12 | intron   | internal intron | NA  | 0.52 | no  | down | 0.17 | no  | 0.91 | no  | down | 1.2E-01 | no  |
| MSTRG.18268.17 : Akap8 : Q63014          | 0.08  | yes | down | 2.7E-04 | yes | chr7  | intron   | internal intron | NA  | 0.93 | no  | down | 0.09 | no  | 0.99 | no  | down | 2.8E-01 | no  |
| MSTRG.6855.7 : Prom1 : Q9JI49            | 8.32  | yes | up   | 2.4E-09 | yes | chr14 | intron   | internal intron | NA  | 0.62 | no  | down | 0.11 | no  | 0.87 | no  | down | 1.5E-05 | yes |
| ENSRNOT00000091470 : Picalm : Q66SY1     | 8.74  | yes | up   | 2.1E-13 | yes | chr1  | intron   | internal intron | NA  | 1.31 | no  | up   | 0.64 | no  | 1.13 | no  | up   | 1.1E-06 | yes |
| MSTRG.1443.14 : Arap1 : F1LM60           | 2.71  | yes | up   | 3.3E-04 | yes | chr1  | intron   | first intron    | NA  | 0.59 | no  | down | 0.34 | no  | 0.99 | no  | down | 2.5E-02 | yes |
| MSTRG.3895.1 : Cdk12 : A0A0G2K5U7        | 5.94  | yes | up   | 1.1E-04 | yes | chr10 | exon     | first exon      | NA  | 1.30 | no  | up   | 0.27 | no  | 0.97 | no  | down | 5.5E-04 | yes |
| MSTRG.18268.10 : Akap8 : Q63014          | 0.08  | yes | down | 2.7E-04 | yes | chr7  | intron   | internal intron | NA  | 1.38 | no  | up   | 0.35 | no  | 0.99 | no  | down | 2.8E-01 | no  |
| MSTRG.15366.1 : Cmas : Q5M963            | 5.02  | yes | up   | 1.4E-04 | yes | chr4  | intron   | internal intron | NA  | 0.97 | no  | down | 0.31 | no  | 0.86 | no  | down | 3.1E-13 | yes |
| MSTRG.19945.1 : Tpm1 : Q923Z2            | 9.41  | yes | up   | 5.1E-14 | yes | chr8  | intron   | internal intron | NA  | 0.98 | no  | down | 0.92 | no  | 0.75 | yes | down | 6.0E-18 | yes |
| MSTRG.18812.1 : Trappe9 : B1H266         | 4.58  | yes | up   | 1.4E-09 | yes | chr7  | intron   | internal intron | NA  | 0.36 | yes | down | 0.14 | no  | 0.94 | no  | down | 3.8E-02 | yes |
| MSTRG.19220.12 : Kmt2d : A0A0G2JVD6      | 6.53  | yes | up   | 2.1E-09 | yes | chr7  | exon     | last exon       | NA  | 1.62 | no  | up   | 0.14 | no  | 1.03 | no  | up   | 3.5E-02 | yes |
| ENSRNOT00000089560 : Tle1 : A0A0G2K324   | 0.11  | yes | down | 4.0E-05 | yes | chr5  | exon     | last exon       | NA  | 0.85 | no  | down | 0.51 | no  | 0.95 | no  | down | 1.3E-05 | yes |
| MSTRG.15479.3 : Prex2 : A0A0G2KA11       | 5.57  | yes | up   | 1.6E-04 | yes | chr5  | intron   | internal intron | NA  | 0.64 | no  | down | 0.31 | no  | 1.02 | no  | up   | 2.3E-01 | no  |
| ENSRNOT00000090032 : Naa35 : Q6DKG0      | inf   | yes | up   | 1.7E-04 | yes | chr17 | promoter | Proximal        | LCP | 3.38 | yes | up   | 0.03 | yes | 1.04 | no  | up   | 3.3E-02 | yes |
| ENSRNOT00000051338 : Inpp5d : F1M981     | 0.08  | yes | down | 9.9E-05 | yes | chr9  | intron   | internal intron | NA  | 1.53 | no  | up   | 0.10 | no  | 1.08 | no  | up   | 3.1E-05 | yes |
| ENSRNOT00000068553 : Neb1 : F1LVX3       | 0     | yes | down | 3.8E-04 | yes | chr17 | intron   | first intron    | NA  | 1.16 | no  | up   | 0.10 | no  | 1.02 | no  | up   | 2.0E-01 | no  |
| ENSRNOT00000091357 : Cic : D4A853        | 4.32  | yes | up   | 3.8E-07 | yes | chr1  | exon     | internal exon   | NA  | 1.06 | no  | up   | 0.73 | no  | 1.06 | no  | up   | 4.3E-02 | yes |
| MSTRG.10830.4 : Phc3 : D3ZS50            | 0.36  | yes | down | 4.0E-04 | yes | chr2  | intron   | internal intron | NA  | 0.58 | no  | down | 0.61 | no  | 0.86 | no  | down | 4.2E-04 | yes |
| MSTRG.276.8 : Arid1b : F1LNP1            | 1.53  | yes | up   | 6.5E-08 | yes | chr1  | promoter | Proximal        | LCP | 1.18 | no  | up   | 0.83 | no  | 0.98 | no  | down | 1.8E-01 | no  |
| MSTRG.13195.10 : Arhgap1 : D4A6C5        | 3.73  | yes | up   | 1.8E-11 | yes | chr3  | intron   | internal intron | NA  | 0.71 | no  | down | 0.46 | no  | 1.04 | no  | up   | 1.7E-04 | yes |
| MSTRG.19657.1 : Ube4a : F1M9N5           | 4.51  | yes | up   | 1.3E-04 | yes | chr8  | intron   | internal intron | NA  | 0.69 | no  | down | 0.37 | no  | 0.97 | no  | down | 2.4E-03 | yes |
| MSTRG.11813.2 : Wls : Q6P689             | 0.38  | yes | down | 6.5E-05 | yes | chr2  | exon     | last exon       | NA  | 0.94 | no  | down | 0.88 | no  | 1.11 | no  | up   | 1.3E-07 | yes |
| ENSRNOT00000065542 : Kcnma1 : A0A0G2K104 | 4.06  | yes | up   | 2.6E-13 | yes | chr15 | intron   | internal intron | NA  | 0.93 | no  | down | 0.42 | no  | 0.89 | no  | down | 7.4E-06 | yes |
| ENSRNOT00000093656 : Phf8 : D4AD31       | 0     | yes | down | 2.1E-07 | yes | chrX  | exon     | first exon      | NA  | 1.05 | no  | up   | 0.47 | no  | 1.13 | no  | up   | 3.6E-02 | yes |
| MSTRG.12337.4 : Sgpl1 : Q8CHN6           | 0.20  | yes | down | 6.8E-07 | yes | chr20 | intron   | internal intron | NA  | 1.06 | no  | up   | 0.92 | no  | 1.12 | no  | up   | 5.6E-16 | yes |
| MSTRG.16317.7 : Cap1 : Q08163            | 0.21  | yes | down | 1.6E-07 | yes | chr5  | intron   | internal intron | NA  | 3.81 | yes | up   | 0.05 | yes | 0.94 | no  | down | 1.0E-08 | yes |
| ENSRNOT00000079709 : Mthc2 : A0A0G2K459  | 2.54  | yes | up   | 4.3E-04 | yes | chr3  | intron   | internal intron | NA  | 0.93 | no  | down | 0.70 | no  | 1.00 | no  | up   | 8.3E-01 | no  |
| ENSRNOT00000010689 : Plscr1 : A0A0G2K7Q1 | 0.33  | yes | down | 1.3E-05 | yes | chr8  | promoter | Distal          | LCP | 1.04 | no  | up   | 0.91 | no  | 1.08 | no  | up   | 5.2E-06 | yes |
| ENSRNOT000000008321 : Lamb1 : D3ZQN7     | 3.86  | yes | up   | 8.9E-05 | yes | chr6  | intron   | internal intron | NA  | 2.02 | yes | up   | 0.49 | no  | 1.31 | yes | up   | 5.4E-17 | yes |
| MSTRG.16007.4 : Dnmd4c : F1LTD7          | 0.31  | yes | down | 2.0E-04 | yes | chr5  | intron   | internal intron | NA  | 0.54 | no  | down | 0.54 | no  | 0.97 | no  | down | 9.0E-02 | no  |
| ENSRNOT00000023033 : Klf6 : G3V880       | 14.58 | yes | up   | 4.1E-04 | yes | chr17 | intron   | internal intron | NA  | 1.05 | no  | up   | 0.64 | no  | 0.81 | yes | down | 4.1E-06 | yes |
| MSTRG.16327.10 : Macf1 : A0A0G2K9T4      | 0.36  | yes | down | 1.3E-05 | yes | chr5  | exon     | last exon       | NA  | 2.21 | yes | up   | 0.09 | no  | 0.97 | no  | down | 9.0E-11 | yes |
| MSTRG.8511.1 : Dapk1 : F1LNN8            | 0.35  | yes | down | 1.5E-04 | yes | chr17 | intron   | internal intron | NA  | 0.93 | no  | down | 0.89 | no  | 0.96 | no  | down | 1.0E-01 | no  |
| MSTRG.12174.1 : Col18a1 : F1LR02         | 0.22  | yes | down | 4.1E-11 | yes | chr20 | exon     | internal exon   | NA  | 2.39 | yes | up   | 0.61 | no  | 1.03 | no  | up   | 3.6E-07 | yes |
| MSTRG.21202.6 : Lrrfp1 : Q66HF9          | 6.49  | yes | up   | 4.9E-10 | yes | chr9  | exon     | last exon       | NA  | 0.81 | no  | down | 0.14 | no  | 1.15 | no  | up   | 2.1E-11 | yes |
| MSTRG.21023.11 : Fn1 : F1LST1            | 0.11  | yes | down | 7.7E-11 | yes | chr9  | intron   | internal intron | NA  | 8.43 | yes | up   | 0.01 | yes | 1.27 | yes | up   | 4.1E-20 | yes |
| MSTRG.4716.1 : Adcy5 : Q3V9G1            | 0.16  | yes | down | 2.3E-10 | yes | chr11 | intron   | internal intron | NA  | 0.39 | yes | down | 0.45 | no  | 1.00 | no  | down | 7.6E-01 | no  |
| MSTRG.14948.7 : Magi1 : M0R8T1           | 0.38  | yes | down | 2.0E-04 | yes | chr4  | intron   | internal intron | NA  | 1.24 | no  | up   | 0.13 | no  | 0.99 | no  | down | 6.0E-01 | no  |
| MSTRG.2561.1 : Chuk : B5DF32             | 24.13 | yes | up   | 2.0E-05 | yes | chr1  | intron   | internal intron | NA  | 1.14 | no  | up   | 0.67 | no  | 0.90 | no  | down | 8.1E-05 | yes |
| MSTRG.10570.2 : Skiv2l2 : D4AE49         | 5.78  | yes | up   | 1.8E-10 | yes | chr2  | intron   | internal intron | NA  | 1.20 | no  | up   | 0.09 | no  | 0.99 | no  | down | 1.0E-01 | no  |
| MSTRG.256.2 : Syne1 : Q8VHJ9             | 0.04  | yes | down | 1.5E-19 | yes | chr1  | exon     | first exon      | NA  | 1.79 | no  | up   | 0.47 | no  | 0.89 | no  | down | 8.9E-14 | yes |
| MSTRG.6713.4 : Fryl : D3ZQY4             | 2.76  | yes | up   | 1.7E-04 | yes | chr14 | intron   | internal intron | NA  | 0.75 | no  | down | 0.49 | no  | 1.00 | no  | down | 4.6E-01 | no  |
| ENSRNOT00000016418 : Prkcb : A0A0G2K5Q0  | 3.82  | yes | up   | 4.6E-04 | yes | chr1  | intron   | internal intron | NA  | 1.01 | no  | up   | 0.47 | no  | 1.10 | no  | up   | 1.7E-07 | yes |
| ENSRNOT00000087874 : Filip1 : F1LM79     | 4.15  | yes | up   | 2.1E-10 | yes | chr8  | exon     | first exon      | NA  | 1.00 | no  | down | 0.45 | no  | 1.01 | no  | up   | 3.0E-01 | no  |
| MSTRG.19963.3 : Sltn : A0A0G2K904        | 0.34  | yes | down | 6.4E-06 | yes | chr8  | intron   | internal intron | NA  | 1.45 | no  | up   | 0.30 | no  | 0.94 | no  | down | 2.8E-02 | yes |
| ENSRNOT00000075279 : Mut : D3ZKG1        | 0.31  | yes | down | 1.0E-06 | yes | chr9  | exon     | last exon       | NA  | 1.22 | no  | up   | 0.30 | no  | 1.07 | no  | up   | 3.0E-06 | yes |
| MSTRG.4030.13 : Eftud2 : F1LM66          | 4.66  | yes | up   | 6.0E-04 | yes | chr10 | exon     | internal exon   | NA  | 0.91 | no  | down | 0.48 | no  | 1.02 | no  | up   | 4.9E-02 | yes |
| MSTRG.479.3 : Epn1 : O88339              | 2.09  | yes | up   | 1.9E-04 | yes | chr1  | intron   | internal intron | NA  | 1.16 | no  | up   | 0.22 | no  | 0.99 | no  | down | 3.7E-01 | no  |
| ENSRNOT00000012760 : Pdk4 : G3V778       | 0.20  | yes | down | 7.9E-09 | yes | chr4  | promoter | Proximal        | LCP | 0.28 | yes | down | 0.05 | yes | 0.63 | yes | down | 5.5E-19 | yes |
| MSTRG.21176.9 : Inpp5d : F1M981          | 0.08  | yes | down | 9.9E-05 | yes | chr9  | intron   | internal intron | NA  | 0.65 | no  | down | 0.06 | no  | 1.08 | no  | up   | 3.1E-05 | yes |
| ENSRNOT00000001695 : Col6a2 : F1LNH3     | 7.44  |     |      |         |     |       |          |                 |     |      |     |      |      |     |      |     |      |         |     |

|                                         |       |     |      |         |     |       |          |                 |     |      |     |      |      |     |      |     |      |         |     |
|-----------------------------------------|-------|-----|------|---------|-----|-------|----------|-----------------|-----|------|-----|------|------|-----|------|-----|------|---------|-----|
| MSTRG.16636.5 : Ubr4 : A0A0G2JU89       | 2.84  | yes | up   | 3.7E-05 | yes | chr5  | intron   | internal intron | NA  | 0.55 | no  | down | 0.50 | no  | 1.02 | no  | up   | 4.6E-05 | yes |
| ENSRNOT00000090299 : Dzip11 : Q5XIA0    | 0.67  | yes | down | 4.1E-05 | yes | chr8  | intron   | internal intron | NA  | 0.59 | no  | down | 0.31 | no  | 1.09 | no  | up   | 1.8E-03 | yes |
| MSTRG.5972.2 : Ptprc : P04157           | 2.98  | yes | up   | 6.9E-14 | yes | chr13 | intron   | internal intron | NA  | 1.11 | no  | up   | 0.80 | no  | 1.12 | no  | up   | 6.1E-15 | yes |
| ENSRNOT00000091541 : Fcgr2b : A3RLA8    | 0.44  | yes | down | 2.8E-04 | yes | chr13 | promoter | Distal          | LCP | 0.99 | no  | down | 0.88 | no  | 1.04 | no  | up   | 4.3E-03 | yes |
| MSTRG.18268.22 : Akap8 : Q63014         | 0.08  | yes | down | 2.7E-04 | yes | chr7  | intron   | internal intron | NA  | 1.36 | no  | up   | 0.52 | no  | 0.99 | no  | down | 2.8E-01 | yes |
| MSTRG.3895.5 : Cdk12 : A0A0G2K5U7       | 5.94  | yes | up   | 1.1E-04 | yes | chr10 | exon     | first exon      | NA  | 1.21 | no  | up   | 0.21 | no  | 0.97 | no  | down | 5.5E-04 | no  |
| MSTRG.15096.3 : Cacna1c : F1MA84        | 4.75  | yes | up   | 4.3E-04 | yes | chr4  | intron   | internal intron | NA  | 1.85 | no  | up   | 0.08 | no  | 0.97 | no  | down | 2.7E-02 | yes |
| ENSRNOT00000081533 : Myef2 : A0A0G2K402 | 2.63  | yes | up   | 2.7E-04 | yes | chr3  | promoter | Intermediate    | LCP | 1.18 | no  | up   | 0.41 | no  | 0.93 | no  | down | 4.5E-09 | yes |
| MSTRG.1675.3 : Arhgap17 : D4AAV2        | 0.83  | yes | down | 2.6E-07 | yes | chr1  | intron   | internal intron | NA  | 1.02 | no  | up   | 0.81 | no  | 1.01 | no  | up   | 3.1E-01 | no  |
| ENSRNOT00000088042 : Fbln1 : D3ZQ25     | 0.23  | yes | down | 7.2E-09 | yes | chr7  | intron   | internal intron | NA  | 0.60 | no  | down | 0.20 | no  | 1.06 | no  | up   | 1.7E-09 | yes |
| MSTRG.13130.1 : Calcr1 : Q63118         | 2.81  | yes | up   | 1.2E-04 | yes | chr3  | intron   | internal intron | NA  | 0.69 | no  | down | 0.43 | no  | 1.09 | no  | up   | 1.2E-04 | yes |
| ENSRNOT00000086542 : Ankrd17 : D4A0B4   | 3.39  | yes | up   | 8.9E-05 | yes | chr14 | intron   | internal intron | NA  | 1.64 | no  | up   | 0.58 | no  | 1.11 | no  | up   | 1.6E-06 | yes |
| MSTRG.15963.1 : Ptprd : M0RB22          | 3.73  | yes | up   | 1.3E-08 | yes | chr5  | exon     | internal exon   | NA  | 0.39 | yes | down | 0.11 | no  | 1.01 | no  | up   | 5.3E-01 | no  |
| MSTRG.18670.2 : Ubr5 : H9KVE3           | 4.26  | yes | up   | 2.2E-04 | yes | chr7  | intron   | first intron    | NA  | 0.25 | yes | down | 0.19 | no  | 0.94 | no  | down | 3.0E-02 | yes |
| ENSRNOT00000086641 : Clasp1 : F1LNR1    | 0.36  | yes | down | 6.7E-07 | yes | chr13 | intron   | internal intron | NA  | 1.00 | no  | down | 0.65 | no  | 1.00 | no  | down | 7.0E-01 | no  |
| MSTRG.12277.3 : Ctnna3 : F1M4I1         | 0     | yes | down | 1.3E-06 | yes | chr20 | promoter | Distal          | LCP | 0.95 | no  | down | 0.84 | no  | 0.92 | no  | down | 3.6E-04 | yes |
| MSTRG.1907.3 : Ptdss2 : B2GV22          | 0.17  | yes | down | 6.9E-07 | yes | chr1  | intron   | internal intron | NA  | 0.91 | no  | down | 0.68 | no  | 0.94 | no  | down | 7.1E-04 | yes |
| ENSRNOT00000030399 : Afg3l1 : B5DEY1    | 0.32  | yes | down | 4.6E-04 | yes | chr19 | exon     | internal exon   | NA  | 0.98 | no  | down | 0.86 | no  | 0.98 | no  | down | 3.4E-01 | no  |
| MSTRG.11091.2 : Gucyl1a3 : P19686       | 0.26  | yes | down | 3.9E-06 | yes | chr2  | intron   | internal intron | NA  | 1.81 | no  | up   | 0.37 | no  | 0.85 | no  | down | 1.4E-12 | yes |
| MSTRG.16821.2 : Prdm16 : M0RDL0         | 0.37  | yes | down | 2.7E-04 | yes | chr5  | exon     | internal exon   | NA  | 0.77 | no  | down | 0.45 | no  | 0.83 | yes | down | 1.1E-06 | yes |
| ENSRNOT00000050555 : Atm : A0A0G2K310   | 0.65  | yes | down | 2.4E-04 | yes | chr8  | intron   | internal intron | NA  | 1.00 | no  | down | 0.50 | no  | 1.01 | no  | up   | 4.6E-01 | no  |
| MSTRG.12059.1 : Srsf3 : A0A0U1RRV7      | 4.40  | yes | up   | 1.5E-08 | yes | chr20 | intron   | internal intron | NA  | 0.90 | no  | down | 0.30 | no  | 0.94 | no  | down | 5.5E-08 | yes |
| ENSRNOT00000089336 : Herc1 : A0A0G2JTT6 | 10.78 | yes | up   | 2.7E-04 | yes | chr8  | intron   | internal intron | NA  | 1.27 | no  | up   | 0.46 | no  | 1.04 | no  | up   | 5.4E-02 | no  |
| MSTRG.2161.3 : Men1 : Q9WVR8            | 4.89  | yes | up   | 3.4E-06 | yes | chr1  | exon     | last exon       | NA  | 0.94 | no  | down | 0.81 | no  | 1.06 | no  | up   | 2.0E-04 | yes |
| ENSRNOT00000009207 : Mrps16 : D4A7X1    | 1.05  | no  | up   | 1.6E-04 | yes | chr15 | exon     | internal exon   | NA  | 0.49 | yes | down | 0.49 | no  | 0.94 | no  | down | 1.4E-01 | no  |
| MSTRG.13952.2 : Stau1 : Q9ESY8          | 0.08  | yes | down | 6.3E-05 | yes | chr3  | intron   | internal intron | NA  | 0.99 | no  | down | 0.92 | no  | 1.05 | no  | up   | 2.2E-05 | yes |
| MSTRG.2161.4 : Map4k2 : D3ZXB1          | 4.89  | yes | up   | 3.4E-06 | yes | chr1  | intron   | internal intron | NA  | 1.84 | no  | up   | 0.38 | no  | 0.65 | yes | down | 2.4E-14 | yes |
| ENSRNOT00000083271 : Magi1 : M0R8T1     | 0.38  | yes | down | 2.0E-04 | yes | chr4  | intron   | internal intron | NA  | 1.00 | no  | down | 0.48 | no  | 0.99 | no  | down | 6.0E-01 | no  |
| ENSRNOT00000093046 : Trim21 : D4ACF2    | 0.20  | yes | down | 5.7E-10 | yes | chr1  | promoter | Distal          | LCP | 0.93 | no  | down | 0.58 | no  | 0.96 | no  | down | 1.3E-04 | yes |
| ENSRNOT00000017883 : Rbpms : F2Z3S5     | 0.02  | yes | down | 2.6E-05 | yes | chr16 | promoter | Proximal        | ICP | 1.57 | no  | up   | 0.06 | no  | 1.06 | no  | up   | 4.9E-05 | yes |
| ENSRNOT00000006492 : Ylpm1 : A0A0G2K678 | 0.14  | yes | down | 2.3E-07 | yes | chr6  | intron   | internal intron | NA  | 1.00 | no  | down | 0.55 | no  | 1.02 | no  | up   | 1.8E-03 | yes |
| MSTRG.11953.15 : RT1-CE7 : D3ZLE6       | inf   | yes | up   | 7.3E-07 | yes | chr20 | exon     | internal exon   | NA  | 1.38 | no  | up   | 0.34 | no  | 1.22 | yes | up   | 7.3E-16 | yes |
| ENSRNOT00000015172 : Mcc : F1LZS6       | 43.12 | yes | up   | 1.3E-14 | yes | chr1  | exon     | last exon       | NA  | 0.78 | no  | down | 0.34 | no  | 0.85 | no  | down | 3.7E-04 | yes |
| MSTRG.12945.2 : Fmnl2 : A0A0G2K132      | 0.84  | no  | down | 6.1E-07 | yes | chr3  | intron   | internal intron | NA  | 1.58 | no  | up   | 0.23 | no  | 1.00 | no  | down | 9.6E-01 | no  |
| MSTRG.5906.1 : Atp2b4 : Q64542          | 2.31  | yes | up   | 1.3E-05 | yes | chr13 | intron   | internal intron | NA  | 0.56 | no  | down | 0.20 | no  | 0.68 | yes | down | 2.6E-19 | yes |
| MSTRG.20817.2 : Map4k4 : A0A0G2K7W4     | 0.36  | yes | down | 7.1E-05 | yes | chr9  | intron   | internal intron | NA  | 1.15 | no  | up   | 0.14 | no  | 1.10 | no  | up   | 7.1E-06 | yes |
| MSTRG.12184.1 : Pent : D3ZMY8           | 0.14  | yes | down | 8.5E-07 | yes | chr20 | promoter | Distal          | ICP | 1.15 | no  | up   | 0.72 | no  | 0.84 | no  | down | 9.2E-06 | yes |
| ENSRNOT00000024609 : Uqcrfsl : P20788   | 0.51  | yes | down | 3.6E-04 | yes | chr17 | exon     | last exon       | NA  | 0.73 | no  | down | 0.23 | no  | 0.96 | no  | down | 2.1E-06 | yes |
| MSTRG.16557.7 : Srrml : B2RYB3          | 2.05  | yes | up   | 2.0E-04 | yes | chr5  | intron   | internal intron | NA  | 1.92 | no  | up   | 0.16 | no  | 1.10 | no  | up   | 2.8E-06 | yes |
| ENSRNOT00000017254 : Rhoc : B2RYP0      | 0.09  | yes | down | 2.2E-12 | yes | chr2  | intron   | first intron    | NA  | 0.93 | no  | down | 0.42 | no  | 0.96 | no  | down | 1.7E-03 | yes |
| MSTRG.19538.4 : Nfrikb : D4A421         | 0.58  | yes | down | 1.3E-05 | yes | chr8  | intron   | internal intron | NA  | 0.90 | no  | down | 0.81 | no  | 0.89 | no  | down | 2.5E-03 | yes |
| MSTRG.11265.27 : Ubap2l : E9PTR4        | 6.62  | yes | up   | 4.0E-04 | yes | chr2  | intron   | internal intron | NA  | 1.42 | no  | up   | 0.20 | no  | 1.13 | no  | up   | 3.8E-12 | yes |
| ENSRNOT00000027165 : Chpf : Q5XIQ8      | 1.40  | yes | up   | 4.1E-04 | yes | chr9  | intron   | internal intron | NA  | 1.79 | no  | up   | 0.06 | no  | 1.00 | no  | down | 8.4E-01 | no  |
| MSTRG.323.8 : LOC108348175 : A0A0G2JUS0 | 0.05  | yes | down | 4.0E-19 | yes | chr1  | promoter | Intermediate    | LCP | 1.35 | no  | up   | 0.67 | no  | 1.01 | no  | up   | 4.0E-01 | no  |
| ENSRNOT00000008041 : Ctnna1 : Q5U302    | 2.58  | yes | up   | 1.7E-05 | yes | chr18 | intron   | internal intron | NA  | 0.93 | no  | down | 0.53 | no  | 0.96 | no  | down | 3.1E-09 | yes |
| MSTRG.8278.21 : Rbpms : F2Z3S5          | 0.02  | yes | down | 2.6E-05 | yes | chr16 | promoter | Proximal        | ICP | 1.21 | no  | up   | 0.36 | no  | 1.06 | no  | up   | 4.9E-05 | yes |
| ENSRNOT00000060683 : Stk11 : A0A0H2UI02 | 0.18  | yes | down | 9.1E-05 | yes | chr7  | exon     | last exon       | NA  | 1.18 | no  | up   | 0.18 | no  | 0.88 | no  | down | 1.8E-03 | yes |
| ENSRNOT00000004140 : Plcd3 : D4A978     | inf   | yes | up   | 1.4E-05 | yes | chr10 | promoter | Distal          | LCP | 0.87 | no  | down | 0.53 | no  | 0.86 | no  | down | 2.9E-08 | yes |
| ENSRNOT00000088378 : Arhgap5 : Q6TUE6   | 4.16  | yes | up   | 3.9E-08 | yes | chr6  | exon     | first exon      | NA  | 1.03 | no  | up   | 0.77 | no  | 1.03 | no  | up   | 4.9E-02 | yes |
| MSTRG.15397.3 : Stk38l : A4GW50         | 0.61  | yes | down | 1.5E-06 | yes | chr4  | intron   | internal intron | NA  | 0.13 | yes | down | 0.15 | no  | 1.16 | no  | up   | 1.1E-11 | yes |
| MSTRG.3572.7 : RGD1307929 : F1LSX1      | 7.34  | yes | up   | 1.1E-12 | yes | chr10 | intron   | internal intron | NA  | 0.77 | no  | down | 0.42 | no  | 0.97 | no  | down | 1.8E-04 | yes |
| MSTRG.16523.5 : Arid1a : D4A3E3         | 0.22  | yes | down | 1.1E-04 | yes | chr5  | intron   | first intron    | NA  | 0.57 | no  | down | 0.22 | no  | 1.00 | no  | down | 2.1E-01 | no  |
| ENSRNOT00000029076 : Tpm3 : Q63610      | 0.37  | yes | down | 8.0E-05 | yes | chr2  | intron   | internal intron | NA  | 1.07 | no  | up   | 0.55 | no  | 1.11 | no  | up   | 3.2E-12 | yes |
| MSTRG.7186.1 : Sptbn1 : A0A0G2K8W9      | 5.72  | yes | up   | 4.0E-04 | yes | chr14 | intron   | internal intron | NA  | 3.11 | yes | up   | 0.44 | no  | 0.87 | no  | down | 1.1E-18 | yes |
| MSTRG.7804.5 : Mycbp2 : D4A2D3          | 0.31  | yes | down | 9.2E-06 | yes | chr15 | intron   | internal intron | NA  | 1.10 | no  | up   | 0.47 | no  | 1.00 | no  | up   | 6.8E-01 | no  |
| MSTRG.16606.5 : Alpl : P08289           | 0.52  | yes | down | 2.4E-04 | yes | chr5  | promoter | Intermediate    | LCP | 0.19 | yes | down | 0.03 | yes | 1.00 | no  | down | 6.2E-01 | no  |
| MSTRG.6919.2 : Cpz : A0A0G2JSJ7         | 3.01  | yes | up   | 1.1E-05 | yes | chr14 | intron   | internal intron | NA  | 0.56 | no  | down | 0.52 | no  | 1.08 | no  | up   | 5.1E-02 | no  |
| MSTRG.5410.3 : Gtf2i : Q5U2Y1           | 5.31  | yes | up   | 4.9E-06 | yes | chr12 | promoter | Distal          | LCP | 0.82 | no  | down | 0.61 | no  | 0.95 | no  | down | 1.5E-07 | yes |
| ENSRNOT00000021758 : Fer : A0A140TAC4   | 3.31  | yes | up   | 2.7E-04 | yes | chr9  | promoter | Proximal        | LCP | 1.17 | no  | up   | 0.50 | no  | 0.92 | no  | down | 7.3E-07 | yes |
| ENSRNOT00000006087 : Egfr : E7CXR8      | 0.25  | yes | down | 9.1E-09 | yes | chr14 | exon     | internal exon   | NA  | 1.33 | no  | up   | 0.08 | no  | 0.99 | no  | down | 2.7E-01 | no  |
| MSTRG.20742.1 : Dst : D3ZC56            | 0.35  | yes | down | 1.3E-05 | yes | chr9  | intron   | internal intron | NA  | 0.64 | no  | down | 0.18 | no  | 1.03 | no  | up   | 7.3E-04 | yes |
| ENSRNOT00000013375 : Eif2s1 : P68101    | 2.64  | yes | up   | 8.2E-05 | yes | chr6  | promoter | Distal          | ICP | 1.19 | no  | up   | 0.19 | no  | 0.99 | no  | down | 3.4E-01 | no  |
| MSTRG.12337.5 : Sgpl1 : Q8CHN6          | 0.20  | yes | down | 6.8E-07 | yes | chr20 | intron   | internal intron | NA  | 1.51 | no  | up   | 0.04 | yes | 1.12 | no  | up   | 5.6E-16 | yes |
| MSTRG.10830.5 : Phc3 : D3ZS50           | 0.36  | yes | down | 4.0E-04 | yes | chr2  | intron   | internal intron | NA  | 1.25 | no  | up   | 0.47 | no  | 0.86 | no  | down | 4.2E-04 | yes |
| MSTRG.2854.1 : Abca3 : A0A0G2K1Q8       | 0.49  | yes | down | 3.5E-07 | yes | chr10 | intron   | internal intron | NA  | 2.32 | yes | up   | 0.33 | no  | 1.05 | no  | up   | 1.5E-04 | yes |
| ENSRNOT00000010633 : Stau1 : Q9ESY8     | 0.08  | yes | down | 6.3E-05 | yes | chr3  | intron   | internal intron | NA  | 1.00 | no  | down | 0.94 | no  | 1.05 | no  | up   | 2.2E-05 | yes |
| MSTRG.4263.4 : Tnrc6c : D3ZRA6          | 0.39  | yes | down | 2.3E-06 | yes | chr10 | intron   | internal intron | NA  | 1.44 | no  | up   | 0.47 | no  | 1.07 | no  | up   | 1.9E-01 | no  |
| MSTRG.18268.6 : Akap8 : Q63014          | 0.08  | yes | down | 2.7E-04 | yes | chr7  | intron   | internal intron | NA  | 0.74 | no  | down | 0.33 | no  | 0.99 | no  | down | 2.8E-01 | no  |
| MSTRG.17007.1 : Fam98a : Q5FWT1         | 0.57  | yes | down | 6.5E-05 | yes | chr6  | exon     | last exon       | NA  | 0.77 | no  | down | 0.69 | no  | 0.98 | no  | down | 9.6E-02 | no  |
| MSTRG.5417.11 : Auts2 : F1M388          | 0.04  | yes | down | 4.8E-14 | yes | chr12 | intron   | internal intron | NA  | 0.73 | no  | down | 0.16 | no  | 1.01 | no  | up   | 5.6E-01 | no  |
| MSTRG.19188.5 : Rpap3 : Q68FQ7          | 0.29  | yes | down | 4.9E-05 | yes | chr7  | intron   |                 |     |      |     |      |      |     |      |     |      |         |     |

|                                          |       |     |      |         |     |       |          |                 |     |      |     |      |      |     |      |     |      |         |     |
|------------------------------------------|-------|-----|------|---------|-----|-------|----------|-----------------|-----|------|-----|------|------|-----|------|-----|------|---------|-----|
| MSTRG.20817.14 : Map4k4 : A0A0G2K7W4     | 0.36  | yes | down | 7.1E-05 | yes | chr9  | intron   | internal intron | NA  | 0.72 | no  | down | 0.50 | no  | 1.10 | no  | up   | 7.1E-06 | yes |
| ENSRNOT00000055992 : Kdm1a : A0A0G2K736  | 0.26  | yes | down | 3.7E-04 | yes | chr5  | intron   | internal intron | NA  | 1.09 | no  | up   | 0.05 | yes | 1.01 | no  | up   | 5.0E-01 | no  |
| MSTRG.16317.8 : Cap1 : Q08163            | 0.21  | yes | down | 1.6E-07 | yes | chr5  | intron   | internal intron | NA  | 0.53 | no  | down | 0.61 | no  | 0.94 | no  | down | 1.0E-08 | yes |
| MSTRG.18206.3 : Cirbp : P60825           | 0.73  | yes | down | 1.3E-04 | yes | chr7  | exon     | first exon      | NA  | 0.80 | no  | down | 0.38 | no  | 0.85 | no  | down | 3.4E-16 | yes |
| MSTRG.9868.3 : Cc2d1a : Q66HA5           | 0.21  | yes | down | 1.7E-05 | yes | chr19 | promoter | Distal          | LCP | 0.80 | no  | down | 0.38 | no  | 0.96 | no  | down | 4.1E-02 | yes |
| ENSRNOT0000004094 : Bst1 : FILSX3        | 13.53 | yes | up   | 3.3E-04 | yes | chr14 | exon     | last exon       | NA  | 1.14 | no  | up   | 0.61 | no  | 1.29 | yes | up   | 2.4E-16 | yes |
| ENSRNOT00000011155 : Vps39 : E9PT04      | inf   | yes | up   | 4.3E-04 | yes | chr3  | intron   | internal intron | NA  | 1.10 | no  | up   | 0.41 | no  | 1.08 | no  | up   | 2.7E-04 | yes |
| MSTRG.9278.1 : Ercc3 : Q4G005            | 0.04  | yes | down | 1.2E-04 | yes | chr18 | promoter | Intermediate    | ICP | 1.61 | no  | up   | 0.59 | no  | 0.97 | no  | down | 5.7E-03 | yes |
| MSTRG.15855.5 : RGD1306148 : F1M446      | 0.22  | yes | down | 4.0E-05 | yes | chr5  | intron   | internal intron | NA  | 1.00 | no  | down | 0.47 | no  | 1.01 | no  | up   | 7.4E-02 | no  |
| ENSRNOT00000080604 : C1qtnf7 : B2RYB7    | 3.60  | yes | up   | 9.8E-06 | yes | chr14 | exon     | last exon       | NA  | 0.75 | no  | down | 0.20 | no  | 0.87 | no  | down | 2.3E-09 | yes |
| MSTRG.14680.2 : Thns12 : Q5M7T9          | 3.56  | yes | up   | 3.5E-12 | yes | chr4  | intron   | internal intron | NA  | 0.98 | no  | down | 0.93 | no  | 0.97 | no  | down | 4.8E-01 | no  |
| ENSRNOT00000017110 : Mfsd5 : A0A0G2KAK9  | 0.14  | yes | down | 6.3E-05 | yes | chr7  | intron   | first intron    | NA  | 1.97 | no  | up   | 0.43 | no  | 1.12 | no  | up   | 3.3E-09 | yes |
| ENSRNOT00000092172 : Rufy3 : A0A0G2K6A9  | 2.37  | yes | up   | 3.9E-04 | yes | chr14 | promoter | Distal          | LCP | 1.25 | no  | up   | 0.46 | no  | 1.11 | no  | up   | 1.3E-05 | yes |
| ENSRNOT00000091488 : Ankmy2 : D3ZC34     | 2.16  | yes | up   | 2.9E-04 | yes | chr6  | promoter | Distal          | ICP | 1.11 | no  | up   | 0.56 | no  | 0.93 | no  | down | 2.5E-09 | yes |
| ENSRNOT00000028751 : Vps45 : O08700      | 3.11  | yes | up   | 8.5E-06 | yes | chr2  | intron   | internal intron | NA  | 1.04 | no  | up   | 0.60 | no  | 0.99 | no  | down | 3.7E-01 | no  |
| ENSRNOT00000011767 : Fggy : Q5FVC3       | 18.59 | yes | up   | 3.3E-04 | yes | chr5  | intron   | internal intron | NA  | 0.68 | no  | down | 0.26 | no  | 0.84 | no  | down | 2.3E-07 | yes |
| MSTRG.1201.4 : Ntrk3 : Q68G04            | 7.03  | yes | up   | 1.5E-06 | yes | chr1  | intron   | internal intron | NA  | 0.57 | no  | down | 0.09 | no  | 0.87 | no  | down | 1.8E-07 | yes |
| MSTRG.4443.2 : Ltn1 : F1M9Q3             | 0.38  | yes | down | 4.2E-04 | yes | chr11 | intron   | internal intron | NA  | 0.78 | no  | down | 0.35 | no  | 1.08 | no  | up   | 1.4E-11 | yes |
| ENSRNOT00000065216 : Mapk8 : A0A0G2KA63  | 0.22  | yes | down | 1.8E-04 | yes | chr16 | intron   | internal intron | NA  | 0.97 | no  | down | 0.87 | no  | 1.06 | no  | up   | 2.4E-05 | yes |
| MSTRG.19655.1 : Kmt2a : F1M0L3           | 0.53  | yes | down | 1.7E-05 | yes | chr8  | exon     | internal exon   | NA  | 0.50 | yes | down | 0.46 | no  | 0.99 | no  | down | 9.3E-01 | no  |
| ENSRNOT00000076030 : Parp4 : A0A096MK99  | 1.23  | yes | up   | 1.1E-06 | yes | chr15 | intron   | last intron     | NA  | 0.62 | no  | down | 0.14 | no  | 0.94 | no  | down | 4.1E-06 | yes |
| MSTRG.15915.1 : Prpf4 : D4A7J8           | 0.23  | yes | down | 2.8E-04 | yes | chr5  | exon     | last exon       | NA  | 1.26 | no  | up   | 0.19 | no  | 1.03 | no  | up   | 3.4E-04 | yes |
| MSTRG.7835.2 : Tm9sf2 : Q66HG5           | 0.39  | yes | down | 9.3E-05 | yes | chr15 | intron   | last intron     | NA  | 6.01 | yes | up   | 0.01 | yes | 1.03 | no  | up   | 6.1E-04 | yes |
| MSTRG.20875.1 : Nab1 : Q62722            | 3.78  | yes | up   | 5.6E-07 | yes | chr9  | exon     | internal exon   | NA  | 0.96 | no  | down | 0.90 | no  | 0.97 | no  | down | 6.0E-01 | no  |
| MSTRG.15479.2 : Prex2 : A0A0G2KA11       | 5.57  | yes | up   | 1.6E-04 | yes | chr5  | intron   | internal intron | NA  | 0.31 | yes | down | 0.01 | yes | 1.02 | no  | up   | 2.3E-01 | no  |
| ENSRNOT00000092331 : Tecpr1 : Q3ZBA0     | 0.43  | yes | down | 3.1E-04 | yes | chr12 | promoter | Intermediate    | LCP | 1.06 | no  | up   | 0.09 | no  | 1.17 | no  | up   | 7.7E-08 | yes |
| MSTRG.18880.4 : Plec : Q6S3A0            | 0.33  | yes | down | 4.2E-06 | yes | chr7  | exon     | last exon       | NA  | 1.31 | no  | up   | 0.08 | no  | 1.11 | no  | up   | 6.0E-08 | yes |
| MSTRG.14930.6 : Grip2 : A0A0H2UHH8       | 2.18  | yes | up   | 2.2E-05 | yes | chr4  | intron   | internal intron | NA  | 0.88 | no  | down | 0.67 | no  | 1.01 | no  | up   | 5.2E-01 | no  |
| MSTRG.10569.5 : Plpp1 : O08564           | 0.47  | yes | down | 8.3E-05 | yes | chr2  | intron   | internal intron | NA  | 0.53 | no  | down | 0.17 | no  | 1.04 | no  | up   | 2.9E-03 | yes |
| MSTRG.13356.1 : Vps18 : B5DFJ4           | 0.55  | yes | down | 3.0E-04 | yes | chr3  | exon     | internal exon   | NA  | 0.86 | no  | down | 0.52 | no  | 1.01 | no  | up   | 4.9E-01 | no  |
| ENSRNOT00000079862 : Dkc1 : P40615       | 0.28  | yes | down | 2.4E-05 | yes | chrX  | intron   | internal intron | NA  | 0.87 | no  | down | 0.56 | no  | 0.99 | no  | down | 3.6E-01 | no  |
| MSTRG.12240.5 : Biccl : A0A0G2K0Y0       | 5.19  | yes | up   | 5.0E-04 | yes | chr20 | intron   | internal intron | NA  | 0.72 | no  | down | 0.68 | no  | 1.52 | yes | up   | 1.2E-05 | yes |
| MSTRG.12137.4 : Pknox1 : Q5BJP1          | 0.26  | yes | down | 3.4E-07 | yes | chr20 | promoter | Proximal        | LCP | 0.77 | no  | down | 0.50 | no  | 0.89 | no  | down | 7.5E-04 | yes |
| ENSRNOT00000084134 : Runx1 : Q63046      | 0.62  | yes | down | 5.4E-05 | yes | chr11 | intron   | first intron    | NA  | 1.11 | no  | up   | 0.48 | no  | 1.47 | yes | up   | 3.2E-10 | yes |
| MSTRG.9433.5 : Rbm27 : F1M1R4            | 0.45  | yes | down | 2.5E-04 | yes | chr18 | intron   | internal intron | NA  | 1.24 | no  | up   | 0.39 | no  | 1.01 | no  | up   | 5.2E-01 | no  |
| MSTRG.13954.4 : Znfx1 : F1LMA9           | 20.79 | yes | up   | 3.0E-04 | yes | chr3  | intron   | internal intron | NA  | 1.58 | no  | up   | 0.10 | no  | 0.92 | no  | down | 1.0E-03 | yes |
| MSTRG.20284.6 : Qrich1 : F1M4M7          | 3.68  | yes | up   | 3.4E-07 | yes | chr8  | exon     | internal exon   | NA  | 0.67 | no  | down | 0.07 | no  | 1.03 | no  | up   | 2.0E-01 | no  |
| MSTRG.16517.3 : Slc9a1 : Q8R4H8          | 0.61  | yes | down | 7.2E-05 | yes | chr5  | intron   | internal intron | NA  | 1.23 | no  | up   | 0.24 | no  | 1.05 | no  | up   | 2.8E-01 | no  |
| ENSRNOT00000067928 : Ptpn18 : Q4KM54     | 0     | yes | down | 1.9E-04 | yes | chr9  | intron   | first intron    | NA  | 0.59 | no  | down | 0.11 | no  | 1.20 | no  | up   | 1.2E-08 | yes |
| ENSRNOT00000049857 : Snrbp : B0BN51      | 0.11  | yes | down | 3.8E-04 | yes | chr3  | intron   | last intron     | NA  | 1.00 | no  | down | 1.00 | no  | 0.98 | no  | down | 4.0E-02 | yes |
| MSTRG.18230.1 : Arhgap45 : D4AAI2        | 5.87  | yes | up   | 2.5E-04 | yes | chr7  | exon     | internal exon   | NA  | 1.19 | no  | up   | 0.29 | no  | 1.20 | no  | up   | 4.5E-05 | yes |
| ENSRNOT00000011654 : Nsf11c : O35987     | 16.74 | yes | up   | 1.8E-04 | yes | chr3  | intron   | first intron    | NA  | 1.01 | no  | up   | 0.94 | no  | 0.98 | no  | down | 1.6E-03 | yes |
| MSTRG.16771.1 : H6pd : D4A7D7            | 0.22  | yes | down | 2.6E-06 | yes | chr5  | intron   | last intron     | NA  | 1.40 | no  | up   | 0.65 | no  | 1.14 | no  | up   | 9.6E-15 | yes |
| MSTRG.4725.9 : Kalrn : P97924            | 1.54  | yes | up   | 9.1E-07 | yes | chr11 | exon     | last exon       | NA  | 1.14 | no  | up   | 0.09 | no  | 1.04 | no  | up   | 1.6E-04 | yes |
| MSTRG.2839.12 : Srrm2 : A0A0G2K2M9       | 1.72  | yes | up   | 9.0E-05 | yes | chr10 | exon     | internal exon   | NA  | 1.00 | no  | down | 0.50 | no  | 1.00 | no  | up   | 9.0E-01 | no  |
| MSTRG.10426.1 : Scamp1 : A0A0G2K1I6      | 11.34 | yes | up   | 2.9E-04 | yes | chr2  | intron   | first intron    | NA  | 1.61 | no  | up   | 0.09 | no  | 1.05 | no  | up   | 3.2E-06 | yes |
| MSTRG.11953.27 : RT1-CE7 : D3ZLE6        | inf   | yes | up   | 7.3E-07 | yes | chr20 | exon     | internal exon   | NA  | 0.65 | no  | down | 0.32 | no  | 1.22 | yes | up   | 7.3E-16 | yes |
| MSTRG.9728.4 : Cnot1 : G3V7M0            | 0.08  | yes | down | 2.6E-04 | yes | chr19 | intron   | internal intron | NA  | 0.75 | no  | down | 0.67 | no  | 1.01 | no  | up   | 1.2E-01 | no  |
| MSTRG.19329.3 : Atf7 : B0BMY0            | 0.38  | yes | down | 7.2E-06 | yes | chr7  | intron   | internal intron | NA  | 1.19 | no  | up   | 0.09 | no  | 1.00 | no  | down | 9.7E-01 | no  |
| MSTRG.21170.2 : Gigyf2 : A0A096MJI4      | 0.59  | yes | down | 1.9E-05 | yes | chr9  | intron   | internal intron | NA  | 0.96 | no  | down | 0.71 | no  | 1.31 | yes | up   | 2.3E-10 | yes |
| MSTRG.13838.2 : Cttnb11 : Q4V8K2         | 5.63  | yes | up   | 4.6E-05 | yes | chr3  | intron   | first intron    | NA  | 1.04 | no  | up   | 0.92 | no  | 1.01 | no  | up   | 3.8E-01 | no  |
| ENSRNOT00000083108 : Cmtr1 : Q5U2Z5      | 4.09  | yes | up   | 4.3E-15 | yes | chr20 | intron   | internal intron | NA  | 0.99 | no  | down | 0.88 | no  | 1.00 | no  | down | 9.7E-01 | no  |
| ENSRNOT00000091063 : At12 : F1LQ09       | 2.32  | yes | up   | 2.9E-04 | yes | chr6  | intron   | last intron     | NA  | 1.00 | no  | down | 0.97 | no  | 0.95 | no  | down | 8.9E-05 | yes |
| MSTRG.20998.3 : Pikfyve : D3ZYT8         | 0.33  | yes | down | 2.0E-04 | yes | chr9  | intron   | internal intron | NA  | 2.44 | yes | up   | 0.09 | no  | 1.22 | yes | up   | 6.5E-08 | yes |
| MSTRG.4508.4 : Dyrk1a : Q63470           | 0.26  | yes | down | 2.2E-05 | yes | chr11 | intron   | internal intron | NA  | 0.56 | no  | down | 0.60 | no  | 1.02 | no  | up   | 1.6E-01 | no  |
| MSTRG.10517.5 : Erbin : M0R9T2           | 3.86  | yes | up   | 2.1E-05 | yes | chr2  | intron   | last intron     | NA  | 0.64 | no  | down | 0.28 | no  | 0.94 | no  | down | 3.9E-05 | yes |
| MSTRG.6818.4 : Rbpj : M0R7Q3             | 0.34  | yes | down | 7.0E-05 | yes | chr14 | intron   | last intron     | NA  | 0.53 | no  | down | 0.32 | no  | 1.08 | no  | up   | 1.1E-04 | yes |
| ENSRNOT00000078645 : Calcr1 : Q63118     | 2.81  | yes | up   | 1.2E-04 | yes | chr3  | intron   | internal intron | NA  | 0.90 | no  | down | 0.75 | no  | 1.09 | no  | up   | 1.2E-04 | yes |
| ENSRNOT00000051000 : Tars12 : Q5XI17     | 0.35  | yes | down | 1.8E-06 | yes | chr1  | intron   | internal intron | NA  | 1.00 | no  | down | 0.87 | no  | 1.01 | no  | up   | 6.4E-01 | no  |
| ENSRNOT00000001669 : Gstt1 : Q01579      | 0.44  | yes | down | 5.4E-04 | yes | chr20 | exon     | last exon       | NA  | 0.92 | no  | down | 0.80 | no  | 0.80 | yes | down | 1.4E-15 | yes |
| MSTRG.5972.1 : Ptpre : P04157            | 2.98  | yes | up   | 6.9E-14 | yes | chr13 | intron   | internal intron | NA  | 1.23 | no  | up   | 0.83 | no  | 1.12 | no  | up   | 6.1E-15 | yes |
| MSTRG.19969.4 : Myzap : Q5EB94           | 0.16  | yes | down | 3.6E-06 | yes | chr8  | exon     | last exon       | NA  | 0.72 | no  | down | 0.16 | no  | 0.84 | no  | down | 4.4E-10 | yes |
| MSTRG.20742.4 : Dst : D3ZC56             | 0.35  | yes | down | 1.3E-05 | yes | chr9  | intron   | internal intron | NA  | 2.19 | yes | up   | 0.15 | no  | 1.03 | no  | up   | 7.3E-04 | yes |
| MSTRG.7804.7 : Mycbp2 : D4A2D3           | 0.31  | yes | down | 9.2E-06 | yes | chr15 | intron   | internal intron | NA  | 0.48 | yes | down | 0.23 | no  | 1.00 | no  | up   | 6.8E-01 | no  |
| MSTRG.17628.1 : Ahsa1 : B0BN63           | 0.11  | yes | down | 3.3E-06 | yes | chr6  | exon     | last exon       | NA  | 1.27 | no  | up   | 0.20 | no  | 1.00 | no  | up   | 4.2E-01 | no  |
| ENSRNOT00000091980 : Clasp2 : A0A0G2JZM8 | 0.25  | yes | down | 1.3E-05 | yes | chr8  | intron   | internal intron | NA  | 0.94 | no  | down | 0.50 | no  | 0.98 | no  | down | 1.8E-01 | no  |
| ENSRNOT00000091840 : Plec : F7F9U6       | 0.33  | yes | down | 4.2E-06 | yes | chr7  | exon     | last exon       | NA  | 1.01 | no  | up   | 0.04 | yes | 0.90 | no  | down | 2.5E-03 | yes |
| MSTRG.20218.4 : Rpl29 : P25886           | 3.86  | yes | up   | 3.0E-04 | yes | chr8  | intron   | first intron    | NA  | 5.06 | yes | up   | 0.20 | no  | 0.98 | no  | down | 6.0E-01 | no  |
| MSTRG.10007.3 : Ctfcl : Q9R1D1           | 2.29  | yes | up   | 1.4E-04 | yes | chr19 | intron   | internal intron | NA  | 0.77 | no  | down | 0.40 | no  | 0.94 | no  | down | 4.5E-07 | yes |
| ENSRNOT00000093182 : Eftud2 : F1LM66     | 4.66  | yes | up   | 6.0E-04 | yes | chr10 | exon     | internal exon   | NA  | 0.95 | no  | down | 0.61 | no  | 1.02 | no  | up   | 4.9E-02 | yes |
| MSTRG.8278.43 : Rbpms : F2Z3S5           | 0.02  | yes | down | 2.6E-05 | yes | chr16 | promoter | Proximal        | ICP |      |     |      |      |     |      |     |      |         |     |

|                                           |       |     |      |         |     |       |          |                 |     |      |    |      |      |     |      |     |      |         |     |
|-------------------------------------------|-------|-----|------|---------|-----|-------|----------|-----------------|-----|------|----|------|------|-----|------|-----|------|---------|-----|
| MSTRG.18268.12 : Akap8 : Q63014           | 0.08  | yes | down | 2.7E-04 | yes | chr7  | intron   | internal intron | NA  | 1.20 | no | up   | 0.33 | no  | 0.99 | no  | down | 2.8E-01 | no  |
| MSTRG.19777.5 : Sin3a : A0A0G2K3H5        | 0.53  | yes | down | 4.1E-06 | yes | chr8  | intron   | last intron     | NA  | 0.68 | no | down | 0.45 | no  | 0.96 | no  | down | 6.2E-05 | yes |
| MSTRG.1334.1 : Dlg2 : F1M907              | 2.35  | yes | up   | 1.4E-05 | yes | chr1  | intron   | internal intron | NA  | 1.75 | no | up   | 0.27 | no  | 0.92 | no  | down | 2.8E-06 | yes |
| MSTRG.14075.3 : Dnajc5 : A0A0G2JX56       | 0.30  | yes | down | 1.1E-06 | yes | chr3  | promoter | Intermediate    | HCP | 0.76 | no | down | 0.11 | no  | 0.89 | no  | down | 4.0E-08 | yes |
| MSTRG.1443.2 : Arap1 : F1LM60             | 2.71  | yes | up   | 3.3E-04 | yes | chr1  | intron   | first intron    | NA  | 1.37 | no | up   | 0.34 | no  | 0.99 | no  | down | 2.5E-02 | yes |
| ENSRNOT00000064965 : Gigyf2 : A0A096MKC0  | 0.59  | yes | down | 1.9E-05 | yes | chr9  | intron   | internal intron | NA  | 0.98 | no | down | 0.32 | no  | 1.01 | no  | up   | 7.0E-01 | no  |
| MSTRG.2768.1 : Usp7 : F1LM09              | inf   | yes | up   | 5.0E-04 | yes | chr10 | intron   | internal intron | NA  | 1.00 | no | down | 0.45 | no  | 1.00 | no  | down | 7.8E-01 | no  |
| MSTRG.4105.1 : Smurf2 : F1M3F2            | 3.77  | yes | up   | 9.3E-06 | yes | chr10 | intron   | internal intron | NA  | 1.43 | no | up   | 0.03 | yes | 1.03 | no  | up   | 6.3E-02 | no  |
| MSTRG.21600.1 : Acot9 : Q5U2X8            | 0.09  | yes | down | 5.0E-06 | yes | chrX  | promoter | Distal          | LCP | 1.21 | no | up   | 0.57 | no  | 0.99 | no  | down | 5.1E-02 | no  |
| ENSRNOT00000016948 : Bag2 : B0BN74        | 0.18  | yes | down | 4.5E-04 | yes | chr9  | promoter | Distal          | ICP | 0.91 | no | down | 0.61 | no  | 1.05 | no  | up   | 1.1E-05 | yes |
| MSTRG.4890.1 : Dvl3 : D4ADV8              | 0.50  | yes | down | 1.6E-05 | yes | chr11 | intron   | first intron    | NA  | 0.73 | no | down | 0.40 | no  | 0.98 | no  | down | 2.0E-01 | no  |
| MSTRG.2161.2 : Men1 : Q9WVR8              | 4.89  | yes | up   | 3.4E-06 | yes | chr1  | exon     | last exon       | NA  | 1.01 | no | up   | 0.97 | no  | 1.06 | no  | up   | 2.0E-04 | yes |
| MSTRG.19173.1 : Ano6 : A0A0G2K1M7         | 3.87  | yes | up   | 9.8E-09 | yes | chr7  | intron   | internal intron | NA  | 0.87 | no | down | 0.27 | no  | 0.91 | no  | down | 2.1E-09 | yes |
| ENSRNOT00000001829 : Taf6 : Q498R0        | 0.74  | yes | down | 2.2E-06 | yes | chr12 | intron   | internal intron | NA  | 1.20 | no | up   | 0.53 | no  | 0.91 | no  | down | 1.8E-03 | yes |
| ENSRNOT000000021816 : Ankfy1 : D4A1J6     | 0.33  | yes | down | 7.9E-05 | yes | chr10 | intron   | internal intron | NA  | 0.82 | no | down | 0.74 | no  | 0.97 | no  | down | 1.1E-04 | yes |
| MSTRG.8278.47 : Rbpms : F2Z3S5            | 0.02  | yes | down | 2.6E-05 | yes | chr16 | promoter | Proximal        | ICP | 1.11 | no | up   | 0.35 | no  | 1.06 | no  | up   | 4.9E-05 | yes |
| MSTRG.12922.3 : Zeb2 : A0A0G2K8T6         | 0.34  | yes | down | 8.0E-09 | yes | chr3  | intron   | internal intron | NA  | 1.49 | no | up   | 0.46 | no  | 1.01 | no  | up   | 2.4E-01 | no  |
| ENSRNOT000000055120 : Pik3c2a : D3ZTF6    | 0.07  | yes | down | 5.5E-05 | yes | chr1  | intron   | internal intron | NA  | 0.87 | no | down | 0.64 | no  | 1.06 | no  | up   | 1.3E-06 | yes |
| ENSRNOT000000049657 : Grip2 : A0A0H2UHH8  | 2.18  | yes | up   | 2.2E-05 | yes | chr4  | intron   | internal intron | NA  | 1.52 | no | up   | 0.48 | no  | 1.01 | no  | up   | 5.2E-01 | no  |
| ENSRNOT000000027512 : Pdcd11 : D3ZNI3     | 0.34  | yes | down | 5.3E-07 | yes | chr1  | exon     | internal exon   | NA  | 1.01 | no | up   | 0.93 | no  | 1.08 | no  | up   | 5.5E-06 | yes |
| ENSRNOT000000032843 : Pde3a : Q62865      | 0.30  | yes | down | 3.1E-07 | yes | chr4  | intron   | internal intron | NA  | 1.31 | no | up   | 0.32 | no  | 1.00 | no  | up   | 9.7E-01 | no  |
| ENSRNOT000000028328 : Bax : Q9JKL3        | 8.53  | yes | up   | 7.6E-07 | yes | chr1  | promoter | Distal          | LCP | 1.04 | no | up   | 0.85 | no  | 1.07 | no  | up   | 5.8E-08 | yes |
| MSTRG.123.5 : Epb41I2 : D3ZM69            | 0.25  | yes | down | 1.1E-12 | yes | chr1  | intron   | internal intron | NA  | 0.98 | no | down | 0.95 | no  | 0.91 | no  | down | 8.9E-11 | yes |
| MSTRG.2433.3 : Rnls : Q5U2W9              | 0.31  | yes | down | 2.4E-05 | yes | chr1  | promoter | Distal          | LCP | 1.43 | no | up   | 0.07 | no  | 1.02 | no  | up   | 3.0E-01 | no  |
| MSTRG.20817.10 : Map4k4 : A0A0G2K7W4      | 0.36  | yes | down | 7.1E-05 | yes | chr9  | intron   | internal intron | NA  | 1.13 | no | up   | 0.47 | no  | 1.10 | no  | up   | 7.1E-06 | yes |
| MSTRG.10163.3 : Cdh13 : Q8R490            | 2.07  | yes | up   | 3.3E-06 | yes | chr19 | promoter | Intermediate    | LCP | 1.08 | no | up   | 0.77 | no  | 0.83 | yes | down | 2.3E-16 | yes |
| ENSRNOT000000062054 : Cast : F1LPH1       | 0.36  | yes | down | 1.6E-06 | yes | chr2  | intron   | internal intron | NA  | 1.24 | no | up   | 0.08 | no  | 0.95 | no  | down | 2.4E-10 | yes |
| MSTRG.11263.4 : Atp8b2 : D4A509           | 0.14  | yes | down | 3.1E-04 | yes | chr2  | exon     | first exon      | NA  | 1.27 | no | up   | 0.47 | no  | 0.92 | no  | down | 5.0E-03 | yes |
| MSTRG.16640.9 : Arhgef101 : M0R7W2        | 2.87  | yes | up   | 9.9E-07 | yes | chr5  | intron   | internal intron | NA  | 0.59 | no | down | 0.45 | no  | 1.13 | no  | up   | 8.4E-04 | yes |
| ENSRNOT000000039186 : Mettl9 : G0Z7P9     | inf   | yes | up   | 1.6E-04 | yes | chr1  | intron   | first intron    | NA  | 1.19 | no | up   | 0.50 | no  | 0.99 | no  | down | 7.9E-01 | no  |
| MSTRG.21202.5 : Lrrfip1 : Q66HF9          | 6.49  | yes | up   | 4.9E-10 | yes | chr9  | exon     | last exon       | NA  | 0.93 | no | down | 0.42 | no  | 1.15 | no  | up   | 2.1E-11 | yes |
| ENSRNOT0000000032535 : Rasip1 : B5DF05    | 6.95  | yes | up   | 1.3E-05 | yes | chr1  | intron   | first intron    | NA  | 1.12 | no | up   | 0.74 | no  | 0.96 | no  | down | 1.3E-02 | yes |
| MSTRG.4890.3 : Dvl3 : D4ADV8              | 0.50  | yes | down | 1.6E-05 | yes | chr11 | intron   | first intron    | NA  | 1.83 | no | up   | 0.09 | no  | 0.98 | no  | down | 2.0E-01 | no  |
| ENSRNOT000000092464 : Tsr1 : D3ZEM8       | 45.59 | yes | up   | 3.4E-04 | yes | chr10 | intron   | internal intron | NA  | 1.18 | no | up   | 0.52 | no  | 1.00 | no  | down | 9.7E-01 | no  |
| ENSRNOT000000029885 : Ddx46 : Q62780      | 0.56  | yes | down | 3.4E-04 | yes | chr17 | intron   | internal intron | NA  | 1.35 | no | up   | 0.14 | no  | 0.98 | no  | down | 1.3E-01 | no  |
| MSTRG.5417.2 : Aut52 : F1M388             | 0.04  | yes | down | 4.8E-14 | yes | chr12 | intron   | internal intron | NA  | 1.18 | no | up   | 0.32 | no  | 1.01 | no  | up   | 5.6E-01 | no  |
| MSTRG.9749.1 : Ccdc102a : D3ZSR7          | 0.89  | no  | down | 6.8E-05 | yes | chr19 | intron   | internal intron | NA  | 0.84 | no | down | 0.01 | yes | 0.95 | no  | down | 3.2E-05 | yes |
| MSTRG.16606.8 : Alpl : P08289             | 0.52  | yes | down | 2.4E-04 | yes | chr5  | promoter | Intermediate    | LCP | 1.00 | no | down | 0.50 | no  | 1.00 | no  | down | 6.2E-01 | no  |
| MSTRG.11964.3 : Ddx39b : Q63413           | 0.02  | yes | down | 4.7E-11 | yes | chr20 | exon     | last exon       | NA  | 0.52 | no | down | 0.27 | no  | 1.01 | no  | up   | 2.0E-01 | no  |
| ENSRNOT000000026617 : Gnpat : Q9ES71      | inf   | yes | up   | 4.2E-12 | yes | chr19 | exon     | last exon       | NA  | 1.14 | no | up   | 0.11 | no  | 1.10 | no  | up   | 6.9E-05 | yes |
| ENSRNOT000000086892 : Dhx8 : A0A0G2K283   | 0.28  | yes | down | 3.7E-05 | yes | chr10 | intron   | internal intron | NA  | 1.01 | no | up   | 0.94 | no  | 0.94 | no  | down | 1.2E-01 | no  |
| ENSRNOT000000014470 : Med12l : A0A0G2JV69 | 6.48  | yes | up   | 1.3E-08 | yes | chr2  | promoter | Distal          | LCP | 1.00 | no | down | 0.83 | no  | 0.61 | yes | down | 2.2E-04 | yes |
| MSTRG.6732.3 : Limch1 : F1M392            | 1.09  | no  | up   | 3.3E-04 | yes | chr14 | intron   | last intron     | NA  | 1.56 | no | up   | 0.56 | no  | 0.85 | no  | down | 1.1E-13 | yes |
| ENSRNOT000000025925 : St13 : P50503       | 0.44  | yes | down | 2.0E-04 | yes | chr7  | intron   | internal intron | NA  | 1.01 | no | up   | 0.94 | no  | 0.92 | no  | down | 6.9E-08 | yes |
| MSTRG.21083.4 : Speg : Q63638             | 0.17  | yes | down | 2.6E-06 | yes | chr9  | intron   | internal intron | NA  | 1.12 | no | up   | 0.55 | no  | 0.88 | no  | down | 2.3E-07 | yes |
| MSTRG.4725.6 : Kalrn : P97924             | 1.54  | yes | up   | 9.1E-07 | yes | chr11 | exon     | last exon       | NA  | 0.97 | no | down | 0.85 | no  | 1.04 | no  | up   | 1.6E-04 | yes |
| MSTRG.6127.1 : Fmo2 : G3V6F6              | 2.66  | yes | up   | 2.1E-11 | yes | chr13 | intron   | internal intron | NA  | 1.17 | no | up   | 0.48 | no  | 1.21 | yes | up   | 2.2E-15 | yes |
| MSTRG.5482.21 : Ncor2 : A0A0G2JU91        | 2.16  | yes | up   | 1.6E-06 | yes | chr12 | intron   | internal intron | NA  | 0.87 | no | down | 0.66 | no  | 1.01 | no  | up   | 7.1E-01 | no  |
| MSTRG.13843.2 : RGD1563354 : F1M4P5       | 0.18  | yes | down | 5.6E-06 | yes | chr3  | promoter | Distal          | LCP | 0.70 | no | down | 0.11 | no  | 0.66 | yes | down | 1.6E-11 | yes |
| ENSRNOT000000041354 : Atp2b1 : P11505     | 4.09  | yes | up   | 4.6E-11 | yes | chr7  | exon     | last exon       | NA  | 1.18 | no | up   | 0.40 | no  | 1.04 | no  | up   | 4.5E-06 | yes |
| MSTRG.19895.2 : Hacd3 : D4ABI7            | 0.11  | yes | down | 1.7E-06 | yes | chr8  | intron   | internal intron | NA  | 1.00 | no | down | 0.05 | yes | 1.02 | no  | up   | 6.2E-05 | yes |
| ENSRNOT000000018622 : Rbp1 : P02696       | 0.28  | yes | down | 1.7E-12 | yes | chr8  | exon     | internal exon   | NA  | 1.06 | no | up   | 0.79 | no  | 1.03 | no  | up   | 1.2E-01 | no  |
| MSTRG.19220.3 : Kmt2d : A0A0G2JVD6        | 6.53  | yes | up   | 2.1E-09 | yes | chr7  | exon     | last exon       | NA  | 0.87 | no | down | 0.73 | no  | 1.03 | no  | up   | 3.5E-02 | yes |
| MSTRG.2010.5 : Ppp6r3 : D3ZBT9            | 3.21  | yes | up   | 8.1E-07 | yes | chr1  | intron   | internal intron | NA  | 0.76 | no | down | 0.41 | no  | 0.98 | no  | down | 7.0E-03 | yes |
| MSTRG.14680.3 : Thns12 : Q5M7T9           | 3.56  | yes | up   | 3.5E-12 | yes | chr4  | intron   | internal intron | NA  | 1.09 | no | up   | 0.70 | no  | 0.97 | no  | down | 4.8E-01 | no  |
| MSTRG.7082.2 : Grb10 : D3ZEA3             | 0.35  | yes | down | 3.4E-07 | yes | chr14 | intron   | internal intron | NA  | 1.24 | no | up   | 0.61 | no  | 1.09 | no  | up   | 4.5E-06 | yes |
| MSTRG.4871.1 : Ephb3 : D3ZH39             | 1.63  | yes | up   | 6.2E-06 | yes | chr11 | intron   | internal intron | NA  | 1.42 | no | up   | 0.21 | no  | 0.86 | no  | down | 1.2E-07 | yes |
| MSTRG.10569.1 : Plpp1 : D08564            | 0.47  | yes | down | 8.3E-05 | yes | chr2  | intron   | internal intron | NA  | 0.94 | no | down | 0.40 | no  | 1.04 | no  | up   | 2.9E-03 | yes |
| MSTRG.3447.6 : Atp2a3 : G3V9U7            | inf   | yes | up   | 2.1E-05 | yes | chr10 | intron   | internal intron | NA  | 1.22 | no | up   | 0.12 | no  | 0.77 | yes | down | 1.7E-16 | yes |
| ENSRNOT000000081021 : Plec : Q6S395       | 0.33  | yes | down | 4.2E-06 | yes | chr7  | exon     | last exon       | NA  | 0.97 | no | down | 0.44 | no  | 1.03 | no  | up   | 2.2E-01 | no  |
| MSTRG.10603.1 : Nnt : Q5BJZ3              | 3.00  | yes | up   | 1.8E-04 | yes | chr2  | intron   | internal intron | NA  | 0.90 | no | down | 0.70 | no  | 0.96 | no  | down | 1.2E-07 | yes |
| MSTRG.18523.1 : Slc35e3 : B2GUZ8          | 8.31  | yes | up   | 7.9E-07 | yes | chr7  | promoter | Intermediate    | LCP | 1.40 | no | up   | 0.62 | no  | 1.18 | no  | up   | 2.7E-09 | yes |
| ENSRNOT000000078562 : Man2b2 : A0A0G2K8F6 | 9.92  | yes | up   | 3.6E-07 | yes | chr14 | intron   | internal intron | NA  | 0.54 | no | down | 0.03 | yes | 1.08 | no  | up   | 4.2E-05 | yes |
| MSTRG.16327.7 : Macf1 : A0A0G2K9T4        | 0.36  | yes | down | 1.3E-05 | yes | chr5  | exon     | last exon       | NA  | 0.88 | no | down | 0.84 | no  | 0.97 | no  | down | 9.0E-11 | yes |
| MSTRG.4525.8 : Mx1 : Q499S4               | 3.65  | yes | up   | 1.1E-13 | yes | chr11 | intron   | internal intron | NA  | 1.09 | no | up   | 0.91 | no  | 1.36 | yes | up   | 1.2E-13 | yes |
| ENSRNOT000000016369 : Rab27b : Q99P74     | 0     | yes | down | 1.4E-04 | yes | chr18 | promoter | Distal          | LCP | 0.89 | no | down | 0.22 | no  | 1.04 | no  | up   | 7.7E-02 | no  |
| MSTRG.5417.8 : Aut52 : F1M388             | 0.04  | yes | down | 4.8E-14 | yes | chr12 | intron   | internal intron | NA  | 0.84 | no | down | 0.62 | no  | 1.01 | no  | up   | 5.6E-01 | no  |
| MSTRG.13910.1 : Pigt : D4A604             | 29.04 | yes | up   | 1.4E-06 | yes | chr3  | intron   | internal intron | NA  | 1.22 | no | up   | 0.11 | no  | 1.02 | no  | up   | 5.9E-02 | no  |
| MSTRG.9728.3 : Cnot1 : G3V7M0             | 0.08  | yes | down | 2.6E-04 | yes | chr19 | intron   | internal intron | NA  | 0.94 | no | down | 0.93 | no  | 1.01 | no  | up   | 1.2E-01 | no  |
| MSTRG.12922.4 : Zeb2 : A0A0G2K8T6         | 0.34  | yes | down | 8.0E-09 | yes | chr3  | intron   | internal intron | NA  | 0.73 | no | down | 0.71 | no  | 1.01 | no  | up   | 2.4E-01 | no  |
| ENSRNOT000000038612 : Aco2 : Q9ER34       | 0     | yes | down | 2.0E-04 | yes | chr7  | promoter | Distal          | ICP | 1.07 | no | up   | 0.49 | no  | 0.90 | no  | down | 5.3E-13 | yes |
| MSTRG                                     |       |     |      |         |     |       |          |                 |     |      |    |      |      |     |      |     |      |         |     |

|                                           |       |     |      |         |     |       |          |                 |     |      |     |      |      |     |      |     |      |         |     |
|-------------------------------------------|-------|-----|------|---------|-----|-------|----------|-----------------|-----|------|-----|------|------|-----|------|-----|------|---------|-----|
| ENSRNOT00000011223 : Nfkb : D4A421        | 0.58  | yes | down | 1.3E-05 | yes | chr8  | intron   | internal intron | NA  | 0.97 | no  | down | 0.50 | no  | 0.89 | no  | down | 2.5E-03 | yes |
| ENSRNOT00000091493 : Siglec1 : A0A0G2K320 | 0.24  | yes | down | 6.2E-06 | yes | chr3  | promoter | Proximal        | LCP | 1.42 | no  | up   | 0.03 | yes | 1.25 | yes | up   | 7.1E-13 | yes |
| MSTRG.9900.1 : Rnaseh2a : Q5U209          | 14.16 | yes | up   | 1.1E-05 | yes | chr19 | intron   | last intron     | NA  | 0.83 | no  | down | 0.62 | no  | 1.08 | no  | up   | 2.6E-05 | yes |
| MSTRG.7350.3 : Ktn1 : D4A4Z9              | 2.49  | yes | up   | 1.2E-04 | yes | chr15 | intron   | internal intron | NA  | 0.93 | no  | down | 0.40 | no  | 1.04 | no  | up   | 2.2E-11 | yes |
| MSTRG.15096.1 : Caena1c : F1MA84          | 4.75  | yes | up   | 4.3E-04 | yes | chr4  | intron   | internal intron | NA  | 0.53 | no  | down | 0.00 | yes | 0.97 | no  | down | 2.7E-02 | yes |
| MSTRG.4030.12 : Eftud2 : F1LM66           | 4.66  | yes | up   | 6.0E-04 | yes | chr10 | exon     | internal exon   | NA  | 0.63 | no  | down | 0.32 | no  | 1.02 | no  | up   | 4.9E-02 | yes |
| ENSRNOT00000059921 : Serpinb6 : Q68FX2    | 5.33  | yes | up   | 5.8E-08 | yes | chr17 | promoter | Distal          | LCP | 1.10 | no  | up   | 0.37 | no  | 0.95 | no  | down | 6.3E-06 | yes |
| ENSRNOT00000080305 : Wls : Q6P689         | 0.38  | yes | down | 6.5E-05 | yes | chr2  | exon     | last exon       | NA  | 0.97 | no  | down | 0.64 | no  | 1.11 | no  | up   | 1.3E-07 | yes |
| MSTRG.5482.4 : Ncor2 : A0A0G2JU91         | 2.16  | yes | up   | 1.6E-06 | yes | chr12 | intron   | internal intron | NA  | 0.68 | no  | down | 0.57 | no  | 1.01 | no  | up   | 7.1E-01 | no  |
| MSTRG.11265.2 : Ubap2l : E9PTR4           | 6.62  | yes | up   | 4.0E-04 | yes | chr2  | intron   | internal intron | NA  | 1.14 | no  | up   | 0.58 | no  | 1.13 | no  | up   | 3.8E-12 | yes |
| ENSRNOT00000082985 : Prkar2b : P12369     | 0.61  | yes | down | 1.6E-04 | yes | chr6  | intron   | internal intron | NA  | 1.09 | no  | up   | 0.09 | no  | 0.71 | yes | down | 2.8E-15 | yes |
| ENSRNOT00000044805 : Dnajb12 : Q5FVC4     | 32.15 | yes | up   | 1.5E-05 | yes | chr20 | exon     | internal exon   | NA  | 0.95 | no  | down | 0.76 | no  | 1.07 | no  | up   | 2.0E-04 | yes |
| MSTRG.20284.2 : Qrich1 : F1M4M7           | 3.68  | yes | up   | 3.4E-07 | yes | chr8  | exon     | internal exon   | NA  | 0.64 | no  | down | 0.45 | no  | 1.03 | no  | up   | 2.0E-01 | no  |
| ENSRNOT00000076146 : Becn1 : Q91XJ1       | 0.15  | yes | down | 1.2E-04 | yes | chr10 | exon     | first exon      | NA  | 0.85 | no  | down | 0.31 | no  | 0.97 | no  | down | 9.2E-02 | no  |
| ENSRNOT00000008788 : Tbc1d10a : Q587K3    | inf   | yes | up   | 1.7E-04 | yes | chr14 | intron   | first intron    | NA  | 0.96 | no  | down | 0.47 | no  | 0.99 | no  | down | 5.8E-01 | no  |
| ENSRNOT00000064705 : Dock9 : F1LSM8       | 0.10  | yes | down | 2.7E-05 | yes | chr15 | intron   | internal intron | NA  | 0.97 | no  | down | 0.91 | no  | 0.97 | no  | down | 2.3E-04 | yes |
| ENSRNOT00000091789 : Myo5a : A0A0G2K9S4   | 1.92  | yes | up   | 1.3E-04 | yes | chr8  | exon     | internal exon   | NA  | 1.20 | no  | up   | 0.62 | no  | 1.12 | no  | up   | 2.4E-10 | yes |
| ENSRNOT00000045628 : Tf : A0A0G2QC06      | 5.10  | yes | up   | 5.5E-06 | yes | chr8  | intron   | first intron    | NA  | 1.34 | no  | up   | 0.46 | no  | 1.08 | no  | up   | 1.0E-13 | yes |
| MSTRG.4443.1 : Ltn1 : F1M9Q3              | 0.38  | yes | down | 4.2E-04 | yes | chr11 | intron   | internal intron | NA  | 0.66 | no  | down | 0.48 | no  | 1.08 | no  | up   | 1.4E-11 | yes |
| ENSRNOT00000084268 : Picalm : Q66WT9      | 8.74  | yes | up   | 2.1E-13 | yes | chr1  | intron   | internal intron | NA  | 0.50 | yes | down | 0.04 | yes | 1.45 | yes | up   | 1.6E-10 | yes |
| MSTRG.11263.1 : Atp8b2 : D4A509           | 0.14  | yes | down | 3.1E-04 | yes | chr2  | exon     | first exon      | NA  | 1.59 | no  | up   | 0.62 | no  | 0.92 | no  | down | 5.0E-03 | yes |
| MSTRG.9846.3 : Pkn1 : Q63433              | 1.53  | yes | up   | 6.1E-04 | yes | chr19 | intron   | internal intron | NA  | 1.44 | no  | up   | 0.40 | no  | 1.01 | no  | up   | 5.4E-01 | no  |
| ENSRNOT00000089229 : Golim4 : Q5BJK8      | 0.34  | yes | down | 3.2E-04 | yes | chr2  | intron   | internal intron | NA  | 1.07 | no  | up   | 0.67 | no  | 1.06 | no  | up   | 1.6E-03 | yes |
| MSTRG.7229.4 : Usp54 : Q6IE24             | 0.36  | yes | down | 1.9E-04 | yes | chr15 | intron   | internal intron | NA  | 1.25 | no  | up   | 0.49 | no  | 0.83 | yes | down | 7.0E-09 | yes |
| ENSRNOT00000084274 : Prom1 : Q9JI49       | 8.32  | yes | up   | 2.4E-09 | yes | chr14 | intron   | internal intron | NA  | 0.76 | no  | down | 0.05 | yes | 0.87 | no  | down | 1.5E-05 | yes |
| MSTRG.1201.6 : Ntrk3 : Q6AG04             | 7.03  | yes | up   | 1.5E-06 | yes | chr1  | intron   | internal intron | NA  | 1.65 | no  | up   | 0.43 | no  | 0.87 | no  | down | 1.8E-07 | yes |
| ENSRNOT00000090060 : Cwc27 : A0A0G2JXR7   | 2.71  | yes | up   | 6.8E-05 | yes | chr2  | intron   | internal intron | NA  | 0.96 | no  | down | 0.29 | no  | 1.19 | no  | up   | 1.4E-06 | yes |
| ENSRNOT00000085735 : Ywhah : P68511       | 0.09  | yes | down | 3.0E-04 | yes | chr14 | intron   | last intron     | NA  | 0.98 | no  | down | 0.80 | no  | 1.00 | no  | down | 5.7E-01 | no  |
| ENSRNOT00000018464 : Tinagl1 : Q4V8N0     | 0.10  | yes | down | 7.3E-25 | yes | chr5  | promoter | Distal          | LCP | 0.57 | no  | down | 0.12 | no  | 0.89 | no  | down | 4.1E-08 | yes |
| ENSRNOT00000086660 : Cand2 : G3V7E8       | 0.39  | yes | down | 2.9E-04 | yes | chr4  | exon     | internal exon   | NA  | 1.01 | no  | up   | 0.87 | no  | 0.97 | no  | down | 1.3E-05 | yes |
| ENSRNOT00000045165 : Ntrk3 : Q68G04       | 7.03  | yes | up   | 1.5E-06 | yes | chr1  | intron   | internal intron | NA  | 1.22 | no  | up   | 0.06 | no  | 0.87 | no  | down | 1.8E-07 | yes |
| MSTRG.20089.1 : Morf4l1 : Q6AYU1          | 0.22  | yes | down | 4.4E-05 | yes | chr8  | intron   | internal intron | NA  | 4.45 | yes | up   | 0.04 | yes | 1.07 | no  | up   | 1.5E-07 | yes |
| ENSRNOT00000019304 : Arhgap17 : D4AAV2    | 0.83  | yes | down | 2.6E-07 | yes | chr1  | intron   | internal intron | NA  | 1.20 | no  | up   | 0.49 | no  | 1.01 | no  | up   | 3.1E-01 | no  |
| MSTRG.21682.2 : Yipf6 : A0A096MJG6        | inf   | yes | up   | 3.8E-06 | yes | chrX  | intron   | first intron    | NA  | 1.97 | no  | up   | 0.09 | no  | 1.03 | no  | up   | 1.9E-01 | no  |
| MSTRG.13130.4 : Calcl1 : Q63118           | 2.81  | yes | up   | 1.2E-04 | yes | chr3  | intron   | internal intron | NA  | 3.78 | yes | up   | 0.17 | no  | 1.09 | no  | up   | 1.2E-04 | yes |
| MSTRG.8278.34 : Rbpms : F2Z3S5            | 0.02  | yes | down | 2.6E-05 | yes | chr16 | promoter | Proximal        | ICP | 1.21 | no  | up   | 0.14 | no  | 1.06 | no  | up   | 4.9E-05 | yes |
| MSTRG.3713.1 : Cltc : F1M779              | 0.27  | yes | down | 1.4E-04 | yes | chr10 | intron   | internal intron | NA  | 0.55 | no  | down | 0.50 | no  | 1.04 | no  | up   | 1.3E-11 | yes |
| MSTRG.3280.2 : Arhgap44 : A0A0H2UHC0      | 7.94  | yes | up   | 4.2E-19 | yes | chr10 | intron   | internal intron | NA  | 0.63 | no  | down | 0.09 | no  | 1.04 | no  | up   | 6.6E-02 | no  |
| ENSRNOT00000092475 : Tsr1 : D3ZEM8        | 45.59 | yes | up   | 3.4E-04 | yes | chr10 | intron   | internal intron | NA  | 1.23 | no  | up   | 0.12 | no  | 1.00 | no  | down | 9.7E-01 | no  |
| MSTRG.13195.9 : Arhgap1 : D4A6C5          | 3.73  | yes | up   | 1.8E-11 | yes | chr3  | intron   | internal intron | NA  | 0.65 | no  | down | 0.47 | no  | 1.04 | no  | up   | 1.7E-04 | yes |
| ENSRNOT00000032780 : Eln : Q99372         | 3.55  | yes | up   | 3.0E-04 | yes | chr12 | intron   | internal intron | NA  | 0.89 | no  | down | 0.81 | no  | 0.82 | yes | down | 3.9E-08 | yes |
| MSTRG.16640.1 : Arhgef10l : M0R7W2        | 2.87  | yes | up   | 9.9E-07 | yes | chr5  | intron   | internal intron | NA  | 1.03 | no  | up   | 0.67 | no  | 1.13 | no  | up   | 8.4E-04 | yes |
| MSTRG.9728.6 : Cnot1 : G3V7M0             | 0.08  | yes | down | 2.6E-04 | yes | chr19 | intron   | internal intron | NA  | 1.17 | no  | up   | 0.68 | no  | 1.01 | no  | up   | 1.2E-01 | no  |
| MSTRG.1683.13 : Il4r : Q63257             | 9.80  | yes | up   | 2.9E-08 | yes | chr1  | intron   | internal intron | NA  | 1.00 | no  | down | 0.64 | no  | 1.11 | no  | up   | 2.1E-05 | yes |
| MSTRG.11797.1 : Cryz : Q6AYT0             | 3.72  | yes | up   | 1.8E-04 | yes | chr2  | intron   | first intron    | NA  | 0.86 | no  | down | 0.71 | no  | 0.91 | no  | down | 9.1E-09 | yes |
| ENSRNOT00000046181 : Rnaseh2a : Q5U209    | 14.16 | yes | up   | 1.1E-05 | yes | chr19 | intron   | last intron     | NA  | 1.10 | no  | up   | 0.70 | no  | 1.08 | no  | up   | 2.6E-05 | yes |
| MSTRG.17241.2 : Prkar2b : P12369          | 0.61  | yes | down | 1.6E-04 | yes | chr6  | intron   | internal intron | NA  | 1.81 | no  | up   | 0.02 | yes | 0.71 | yes | down | 2.8E-15 | yes |
| ENSRNOT00000090538 : Med12l : A0A0G2JV69  | 6.48  | yes | up   | 1.3E-08 | yes | chr2  | promoter | Distal          | LCP | 1.01 | no  | up   | 0.62 | no  | 0.61 | yes | down | 2.2E-04 | yes |
| MSTRG.9598.4 : Cep192 : D4A3X0            | 4.22  | yes | up   | 1.3E-12 | yes | chr18 | intron   | internal intron | NA  | 1.45 | no  | up   | 0.32 | no  | 0.95 | no  | down | 9.1E-04 | yes |
| MSTRG.9846.1 : Pkn1 : Q63433              | 1.53  | yes | up   | 6.1E-04 | yes | chr19 | intron   | internal intron | NA  | 1.23 | no  | up   | 0.40 | no  | 1.01 | no  | up   | 5.4E-01 | no  |
| MSTRG.20817.12 : Map4k4 : A0A0G2K7W4      | 0.36  | yes | down | 7.1E-05 | yes | chr9  | intron   | internal intron | NA  | 0.97 | no  | down | 0.93 | no  | 1.10 | no  | up   | 7.1E-06 | yes |
| MSTRG.7470.15 : Acin1 : E9PST5            | 0.30  | yes | down | 1.1E-04 | yes | chr15 | promoter | Distal          | LCP | 0.71 | no  | down | 0.33 | no  | 0.98 | no  | down | 5.1E-04 | yes |
| MSTRG.162.1 : Tpd52l1 : Q499Q2            | 2.69  | yes | up   | 6.5E-28 | yes | chr1  | promoter | Distal          | LCP | 0.38 | yes | down | 0.01 | yes | 0.97 | no  | down | 5.0E-01 | no  |
| MSTRG.479.4 : Epn1 : O88339               | 2.09  | yes | up   | 1.9E-04 | yes | chr1  | intron   | internal intron | NA  | 0.87 | no  | down | 0.69 | no  | 0.99 | no  | down | 3.7E-01 | no  |
| MSTRG.19956.1 : Myo1c : A0A0G2K9E8        | 3.15  | yes | up   | 9.4E-05 | yes | chr8  | intron   | first intron    | NA  | 1.29 | no  | up   | 0.13 | no  | 0.76 | yes | down | 2.6E-20 | yes |
| MSTRG.2881.4 : Pkd1 : Q9ERV0              | inf   | yes | up   | 6.6E-05 | yes | chr10 | intron   | internal intron | NA  | 0.76 | no  | down | 0.47 | no  | 1.19 | no  | up   | 9.8E-07 | yes |
| ENSRNOT00000066447 : Kif13a : D3ZM20      | 0     | yes | down | 7.8E-05 | yes | chr17 | intron   | internal intron | NA  | 1.13 | no  | up   | 0.66 | no  | 1.00 | no  | up   | 9.5E-01 | no  |
| MSTRG.8278.41 : Rbpms : F2Z3S5            | 0.02  | yes | down | 2.6E-05 | yes | chr16 | promoter | Proximal        | ICP | 0.38 | yes | down | 0.05 | yes | 1.06 | no  | up   | 4.9E-05 | yes |
| ENSRNOT00000085801 : Zeb2 : A0A0G2K8T6    | 0.34  | yes | down | 8.0E-09 | yes | chr3  | intron   | internal intron | NA  | 1.37 | no  | up   | 0.34 | no  | 1.01 | no  | up   | 2.4E-01 | no  |
| ENSRNOT00000054862 : Nap114 : Q5U2Z3      | 0.36  | yes | down | 7.2E-05 | yes | chr1  | intron   | internal intron | NA  | 0.96 | no  | down | 0.22 | no  | 0.98 | no  | down | 3.1E-02 | yes |
| ENSRNOT00000001564 : Ndufv3 : Q6PCU8      | 0     | yes | down | 1.9E-04 | yes | chr20 | intron   | first intron    | NA  | 1.04 | no  | up   | 0.75 | no  | 0.93 | no  | down | 3.2E-03 | yes |
| MSTRG.21008.1 : Myl1 : P02600             | 2.29  | yes | up   | 4.3E-05 | yes | chr9  | promoter | Distal          | LCP | 1.11 | no  | up   | 0.07 | no  | 1.33 | yes | up   | 6.1E-13 | yes |
| ENSRNOT00000040255 : Itp1r : A0A0A0MY31   | 3.16  | yes | up   | 1.1E-05 | yes | chr4  | intron   | internal intron | NA  | 1.00 | no  | down | 0.50 | no  | 0.87 | no  | down | 1.1E-14 | yes |
| MSTRG.9435.7 : Tcegl1 : B5DEZ4            | 0.26  | yes | down | 2.8E-04 | yes | chr18 | promoter | Intermediate    | ICP | 1.53 | no  | up   | 0.00 | yes | 1.02 | no  | up   | 4.4E-02 | yes |
| MSTRG.5778.2 : Pign : E9PTA5              | 0.23  | yes | down | 2.2E-04 | yes | chr13 | intron   | internal intron | NA  | 1.00 | no  | down | 0.75 | no  | 1.05 | no  | up   | 3.6E-03 | yes |
| MSTRG.185.3 : Pcd6 : G3V7W1               | 15.41 | yes | up   | 1.1E-04 | yes | chr1  | promoter | Distal          | LCP | 1.31 | no  | up   | 0.20 | no  | 0.95 | no  | down | 4.9E-04 | yes |
| MSTRG.1683.1 : Il4r : Q63257              | 9.80  | yes | up   | 2.9E-08 | yes | chr1  | intron   | internal intron | NA  | 0.29 | yes | down | 0.40 | no  | 1.11 | no  | up   | 2.1E-05 | yes |
| MSTRG.5482.14 : Ncor2 : A0A0G2JU91        | 2.16  | yes | up   | 1.6E-06 | yes | chr12 | intron   | internal intron | NA  | 1.31 | no  | up   | 0.51 | no  | 1.01 | no  | up   | 7.1E-01 | no  |
| MSTRG.9889.1 : Nf1x : F2Z3R4              | 0.58  | yes | down | 1.9E-06 | yes | chr19 | intron   | internal intron | NA  | 0.96 | no  | down | 0.82 | no  | 0.77 | yes | down | 2.4E-14 | yes |
| MSTRG.21170.1 : Gigyf2 : A0A096MJ14       | 0.59  | yes | down | 1.9E-05 | yes | chr9  | intron   | internal intron | NA  | 0.88 | no  | down | 0.38 | no  | 1.31 | yes | up   | 2.3E-10 | yes |
| ENSRNOT00000090643 : Opeml : F1M2I5       | 2.41  | yes | up   | 1.6E-04 | yes | chr8  | intron   | last intron     | NA  | 0.99 | no  | down | 0.63 | no  | 0.91 | no  |      |         |     |

|                                          |       |     |      |         |     |       |          |                 |     |      |     |      |      |     |      |     |      |         |     |
|------------------------------------------|-------|-----|------|---------|-----|-------|----------|-----------------|-----|------|-----|------|------|-----|------|-----|------|---------|-----|
| ENSRNOT00000016220 : Mapre1 : Q66HR2     | 5.59  | yes | up   | 4.6E-04 | yes | chr3  | intron   | internal intron | NA  | 1.16 | no  | up   | 0.61 | no  | 1.03 | no  | up   | 2.1E-03 | yes |
| ENSRNOT00000055127 : Znfx1 : F1LMA9      | 20.79 | yes | up   | 3.0E-04 | yes | chr3  | intron   | internal intron | NA  | 0.83 | no  | down | 0.75 | no  | 0.92 | no  | down | 1.0E-03 | yes |
| ENSRNOT00000013569 : Bpgm : Q6P6G4       | 0.17  | yes | down | 4.7E-04 | yes | chr4  | intron   | first intron    | NA  | 1.69 | no  | up   | 0.00 | yes | 0.88 | no  | down | 2.8E-09 | yes |
| MSTRG.8692.1 : Pak1ip1 : Q32PZ0          | 0     | yes | down | 6.0E-07 | yes | chr17 | exon     | last exon       | NA  | 1.17 | no  | up   | 0.63 | no  | 1.04 | no  | up   | 7.5E-02 | no  |
| ENSRNOT00000089723 : Mel2a : A0A0G2JSZ4  | 0.04  | yes | down | 2.4E-04 | yes | chr1  | exon     | last exon       | NA  | 1.00 | no  | down | 0.92 | no  | 0.78 | yes | down | 4.1E-07 | yes |
| ENSRNOT00000055194 : Dusp3 : B5DFF7      | 0.16  | yes | down | 1.6E-06 | yes | chr10 | exon     | last exon       | NA  | 0.84 | no  | down | 0.87 | no  | 0.90 | no  | down | 6.2E-11 | yes |
| ENSRNOT00000018005 : Psmb5 : G3V7Q6      | 2.13  | yes | up   | 3.6E-06 | yes | chr15 | exon     | last exon       | NA  | 0.86 | no  | down | 0.49 | no  | 0.99 | no  | down | 3.7E-01 | no  |
| MSTRG.3447.3 : Atp2a3 : G3V9U7           | inf   | yes | up   | 2.1E-05 | yes | chr10 | intron   | internal intron | NA  | 0.99 | no  | down | 0.40 | no  | 0.77 | yes | down | 1.7E-16 | yes |
| ENSRNOT00000081195 : Smarcd1 : D3ZBS9    | 0.24  | yes | down | 1.4E-04 | yes | chr7  | intron   | internal intron | NA  | 1.00 | no  | down | 1.00 | no  | 0.95 | no  | down | 2.9E-07 | yes |
| MSTRG.13870.3 : Plcg1 : G3V845           | 0.24  | yes | down | 1.1E-04 | yes | chr3  | intron   | first intron    | NA  | 0.71 | no  | down | 0.35 | no  | 0.94 | no  | down | 1.8E-09 | yes |
| ENSRNOT00000048848 : Rbms2 : Q4QR81      | 0.04  | yes | down | 2.6E-23 | yes | chr7  | exon     | last exon       | NA  | 0.43 | yes | down | 0.48 | no  | 1.14 | no  | up   | 2.7E-10 | yes |
| ENSRNOT00000088945 : Plec : Q6S395       | 0.33  | yes | down | 4.2E-06 | yes | chr7  | exon     | last exon       | NA  | 1.11 | no  | up   | 0.50 | no  | 1.03 | no  | up   | 2.2E-01 | no  |
| MSTRG.17715.2 : Syne3 : D3ZD24           | 0.24  | yes | down | 2.1E-14 | yes | chr6  | intron   | internal intron | NA  | 1.19 | no  | up   | 0.79 | no  | 1.11 | no  | up   | 3.8E-04 | yes |
| MSTRG.15665.2 : Aco1 : G3V6S2            | 4.49  | yes | up   | 2.7E-06 | yes | chr5  | intron   | internal intron | NA  | 0.74 | no  | down | 0.64 | no  | 0.93 | no  | down | 1.1E-11 | yes |
| MSTRG.7804.5 : Mycbp2 : A0A1W2Q6I3       | 0.31  | yes | down | 9.2E-06 | yes | chr15 | intron   | internal intron | NA  | 1.10 | no  | up   | 0.47 | no  | 1.00 | no  | up   | 8.8E-01 | no  |
| MSTRG.6515.2 : Spp1 : P08721             | 29.54 | yes | up   | 1.8E-44 | yes | chr14 | exon     | last exon       | NA  | 4.80 | yes | up   | 0.11 | no  | 1.32 | yes | up   | 5.2E-14 | yes |
| ENSRNOT00000060111 : Cfh : F1M983        | 0.20  | yes | down | 2.4E-04 | yes | chr13 | intron   | internal intron | NA  | 2.07 | yes | up   | 0.04 | yes | 1.20 | no  | up   | 2.7E-15 | yes |
| MSTRG.3296.5 : Gas7 : M0R4R4             | 4.60  | yes | up   | 4.0E-11 | yes | chr10 | intron   | first intron    | NA  | 7.06 | yes | up   | 0.03 | yes | 1.22 | yes | up   | 2.5E-15 | yes |
| MSTRG.6812.2 : Pcdh7 : Q68HB8            | 0     | yes | down | 4.2E-04 | yes | chr14 | exon     | last exon       | NA  | 0.89 | no  | down | 0.71 | no  | 0.94 | no  | down | 1.0E-07 | yes |
| ENSRNOT00000013392 : Slc33a1 : Q6AYY8    | 0.10  | yes | down | 8.7E-08 | yes | chr2  | exon     | last exon       | NA  | 0.76 | no  | down | 0.19 | no  | 1.05 | no  | up   | 1.4E-05 | yes |
| MSTRG.16757.2 : Ube4b : F1M8V2           | 0.02  | yes | down | 2.8E-12 | yes | chr5  | exon     | last exon       | NA  | 1.08 | no  | up   | 0.54 | no  | 1.06 | no  | up   | 1.6E-06 | yes |
| MSTRG.21039.9 : Tns1 : F1LN42            | 0.09  | yes | down | 2.0E-04 | yes | chr9  | intron   | last intron     | NA  | 0.70 | no  | down | 0.83 | no  | 0.86 | no  | down | 7.8E-19 | yes |
| MSTRG.4335.4 : Pcyt2 : O88637            | 4.82  | yes | up   | 3.0E-05 | yes | chr10 | intron   | last intron     | NA  | 1.57 | no  | up   | 0.01 | yes | 0.94 | no  | down | 1.8E-03 | yes |
| MSTRG.20817.1 : Map4k4 : A0A0G2K7W4      | 0.36  | yes | down | 7.1E-05 | yes | chr9  | intron   | internal intron | NA  | 1.31 | no  | up   | 0.50 | no  | 1.10 | no  | up   | 7.1E-06 | yes |
| ENSRNOT00000092413 : Shank3 : A0A0U1RS13 | 3.23  | yes | up   | 4.3E-05 | yes | chr7  | exon     | first exon      | NA  | 1.19 | no  | up   | 0.62 | no  | 0.98 | no  | down | 1.0E-02 | yes |
| MSTRG.12626.1 : Col5a1 : G3V763          | 0.33  | yes | down | 4.5E-04 | yes | chr3  | intron   | internal intron | NA  | 1.00 | no  | down | 1.00 | no  | 1.08 | no  | up   | 2.2E-06 | yes |
| ENSRNOT00000038589 : Iqgap3 : D3ZCS4     | 6.61  | yes | up   | 2.3E-04 | yes | chr2  | intron   | internal intron | NA  | 1.09 | no  | up   | 0.67 | no  | 1.06 | no  | up   | 2.0E-01 | no  |
| MSTRG.16771.5 : H6pd : D4A7D7            | 0.22  | yes | down | 2.6E-06 | yes | chr5  | intron   | last intron     | NA  | 1.24 | no  | up   | 0.59 | no  | 1.14 | no  | up   | 9.6E-15 | yes |
| ENSRNOT00000056600 : Cop9 : B5DFN0       | inf   | yes | up   | 5.8E-06 | yes | chr9  | promoter | Distal          | LCP | 0.70 | no  | down | 0.40 | no  | 0.77 | yes | down | 2.8E-02 | yes |
| ENSRNOT00000092945 : Picalm : Q66WT9     | 8.74  | yes | up   | 2.1E-13 | yes | chr1  | intron   | internal intron | NA  | 0.63 | no  | down | 0.04 | yes | 1.45 | yes | up   | 1.6E-10 | yes |
| MSTRG.18880.4 : Plec : F7F9U6            | 0.33  | yes | down | 4.2E-06 | yes | chr7  | exon     | last exon       | NA  | 1.31 | no  | up   | 0.08 | no  | 0.90 | no  | down | 2.5E-03 | yes |
| ENSRNOT00000021309 : Agfg1 : F1M9N7      | 3.59  | yes | up   | 1.8E-08 | yes | chr9  | exon     | internal exon   | NA  | 0.81 | no  | down | 0.70 | no  | 1.16 | no  | up   | 6.0E-06 | yes |
| ENSRNOT00000074286 : Mxra7 : F1M1U0      | inf   | yes | up   | 4.6E-04 | yes | chr10 | intron   | internal intron | NA  | 1.03 | no  | up   | 0.89 | no  | 1.16 | no  | up   | 7.7E-10 | yes |
| MSTRG.19503.2 : Anln : M0RDG0            | 0.78  | yes | down | 4.3E-04 | yes | chr8  | intron   | internal intron | NA  | 1.14 | no  | up   | 0.90 | no  | 0.97 | no  | down | 9.1E-01 | no  |
| ENSRNOT00000003052 : Scarb2 : P27615     | 6.44  | yes | up   | 3.7E-05 | yes | chr14 | intron   | internal intron | NA  | 1.11 | no  | up   | 0.67 | no  | 0.99 | no  | down | 3.4E-01 | no  |
| MSTRG.18056.3 : Smarcc2 : D4A510         | 6.20  | yes | up   | 2.1E-04 | yes | chr7  | intron   | last intron     | NA  | 0.65 | no  | down | 0.37 | no  | 0.96 | no  | down | 6.4E-05 | yes |
| MSTRG.3296.1 : Gas7 : M0R4R4             | 4.60  | yes | up   | 4.0E-11 | yes | chr10 | intron   | first intron    | NA  | 1.02 | no  | up   | 0.95 | no  | 1.22 | yes | up   | 2.5E-15 | yes |
| MSTRG.7057.2 : Myo1g : A0A0G2K6E3        | 0.66  | yes | down | 3.2E-12 | yes | chr14 | intron   | internal intron | NA  | 1.51 | no  | up   | 0.35 | no  | 1.04 | no  | up   | 3.4E-02 | yes |
| MSTRG.17007.2 : Fam98a : Q5FWT1          | 0.57  | yes | down | 6.5E-05 | yes | chr6  | exon     | last exon       | NA  | 0.80 | no  | down | 0.50 | no  | 0.98 | no  | down | 9.6E-02 | no  |
| MSTRG.2348.2 : Smc5 : D4A9F0             | 4.35  | yes | up   | 2.4E-09 | yes | chr1  | promoter | Distal          | LCP | 1.15 | no  | up   | 0.18 | no  | 0.86 | no  | down | 3.1E-03 | yes |
| MSTRG.3781.5 : Luc7l3 : D3ZFB2           | 0.31  | yes | down | 4.3E-04 | yes | chr10 | intron   | internal intron | NA  | 1.15 | no  | up   | 0.22 | no  | 0.98 | no  | down | 9.6E-04 | yes |
| MSTRG.256.5 : Synel : Q8VHJ9             | 0.04  | yes | down | 1.5E-19 | yes | chr1  | exon     | first exon      | NA  | 1.47 | no  | up   | 0.68 | no  | 0.89 | no  | down | 8.9E-14 | yes |
| ENSRNOT00000025096 : Naa35 : Q6DKG0      | inf   | yes | up   | 1.7E-04 | yes | chr17 | promoter | Proximal        | LCP | 0.73 | no  | down | 0.18 | no  | 1.04 | no  | up   | 3.3E-02 | yes |
| MSTRG.8325.6 : Hook3 : Q7TQ77            | 0.22  | yes | down | 2.1E-04 | yes | chr16 | intron   | internal intron | NA  | 0.73 | no  | down | 0.45 | no  | 1.01 | no  | up   | 5.0E-03 | yes |
| MSTRG.20817.6 : Map4k4 : A0A0G2K7W4      | 0.36  | yes | down | 7.1E-05 | yes | chr9  | intron   | internal intron | NA  | 0.83 | no  | down | 0.18 | no  | 1.10 | no  | up   | 7.1E-06 | yes |
| MSTRG.7500.5 : Tm9sf1 : Q66HF2           | 5.15  | yes | up   | 5.3E-11 | yes | chr15 | intron   | last intron     | NA  | 1.07 | no  | up   | 0.56 | no  | 1.02 | no  | up   | 4.7E-02 | yes |
| MSTRG.12973.12 : Rbms1 : A0A0G2K4R7      | 0     | yes | down | 3.3E-05 | yes | chr3  | intron   | internal intron | NA  | 1.20 | no  | up   | 0.41 | no  | 0.97 | no  | down | 1.2E-01 | no  |
| MSTRG.3421.4 : Nup88 : O08658            | 0.25  | yes | down | 1.2E-04 | yes | chr10 | intron   | internal intron | NA  | 1.72 | no  | up   | 0.16 | no  | 0.95 | no  | down | 3.4E-05 | yes |
| ENSRNOT00000021153 : Slc2a13 : Q921A2    | 0.21  | yes | down | 3.6E-06 | yes | chr7  | exon     | last exon       | NA  | 1.22 | no  | up   | 0.07 | no  | 0.92 | no  | down | 4.1E-06 | yes |
| MSTRG.6248.4 : Ncstn : Q8CGU6            | 0.30  | yes | down | 6.8E-05 | yes | chr13 | intron   | first intron    | NA  | 1.11 | no  | up   | 0.68 | no  | 1.02 | no  | up   | 4.0E-02 | yes |
| ENSRNOT00000092932 : Sema4a : A0A1B0GWV9 | 3.09  | yes | up   | 1.9E-04 | yes | chr2  | promoter | Intermediate    | LCP | 1.00 | no  | down | 0.80 | no  | 1.07 | no  | up   | 2.4E-05 | yes |
| MSTRG.6812.4 : Pcdh7 : Q68HB8            | 0     | yes | down | 4.2E-04 | yes | chr14 | exon     | last exon       | NA  | 1.00 | no  | down | 0.99 | no  | 0.94 | no  | down | 1.0E-07 | yes |
| ENSRNOT00000076121 : Smndc1 : Q4QQU6     | inf   | yes | up   | 1.3E-04 | yes | chr1  | promoter | Distal          | LCP | 0.81 | no  | down | 0.56 | no  | 1.06 | no  | up   | 2.2E-04 | yes |
| MSTRG.123.1 : Eph41l2 : D3ZM69           | 0.25  | yes | down | 1.1E-12 | yes | chr1  | intron   | internal intron | NA  | 0.72 | no  | down | 0.09 | no  | 0.91 | no  | down | 8.9E-11 | yes |
| ENSRNOT00000084540 : Kpna1 : P83953      | 32    | yes | up   | 7.2E-05 | yes | chr11 | promoter | Distal          | LCP | 1.30 | no  | up   | 0.37 | no  | 1.11 | no  | up   | 5.7E-08 | yes |
| MSTRG.6983.1 : More2 : D4A2C4            | 6.36  | yes | up   | 1.5E-04 | yes | chr14 | promoter | Proximal        | HCP | 0.85 | no  | down | 0.48 | no  | 0.97 | no  | down | 3.2E-01 | no  |
| MSTRG.11285.6 : Npr1 : P18910            | 0.37  | yes | down | 1.2E-04 | yes | chr2  | intron   | internal intron | NA  | 1.41 | no  | up   | 0.38 | no  | 1.02 | no  | up   | 1.6E-02 | yes |
| MSTRG.18661.1 : Ywhaz : P63102           | 3.68  | yes | up   | 2.7E-04 | yes | chr7  | intron   | last intron     | NA  | 2.06 | yes | up   | 0.60 | no  | 0.87 | no  | down | 1.2E-13 | yes |
| ENSRNOT00000084268 : Picalm : Q66SY1     | 8.74  | yes | up   | 2.1E-13 | yes | chr1  | intron   | internal intron | NA  | 0.50 | yes | down | 0.04 | yes | 1.13 | no  | up   | 1.1E-06 | yes |
| MSTRG.20284.3 : Qrich1 : F1M4M7          | 3.68  | yes | up   | 3.4E-07 | yes | chr8  | exon     | internal exon   | NA  | 0.59 | no  | down | 0.54 | no  | 1.03 | no  | up   | 2.0E-01 | no  |
| ENSRNOT00000083312 : Ecil1 : P23965      | 6.21  | yes | up   | 1.7E-05 | yes | chr10 | intron   | internal intron | NA  | 1.00 | no  | down | 0.50 | no  | 0.85 | no  | down | 2.2E-15 | yes |
| ENSRNOT00000006961 : Itgav : F1LZX9      | 24.74 | yes | up   | 1.9E-17 | yes | chr3  | intron   | first intron    | NA  | 1.28 | no  | up   | 0.26 | no  | 0.92 | no  | down | 1.7E-15 | yes |
| MSTRG.15356.5 : Pde3a : Q62865           | 0.30  | yes | down | 3.1E-07 | yes | chr4  | intron   | internal intron | NA  | 0.75 | no  | down | 0.40 | no  | 1.00 | no  | up   | 9.7E-01 | no  |
| MSTRG.14960.2 : Eogt : Q5NDL0            | 6.71  | yes | up   | 1.7E-04 | yes | chr4  | intron   | internal intron | NA  | 1.06 | no  | up   | 0.89 | no  | 1.10 | no  | up   | 2.0E-05 | yes |
| MSTRG.20878.7 : Glis : A0A0G2KAN7        | 0.05  | yes | down | 1.5E-13 | yes | chr9  | intron   | first intron    | NA  | 1.00 | no  | down | 0.99 | no  | 1.09 | no  | up   | 8.3E-03 | yes |
| ENSRNOT00000091230 : Exoc1 : Q4V8H2      | inf   | yes | up   | 6.1E-05 | yes | chr14 | intron   | first intron    | NA  | 0.83 | no  | down | 0.23 | no  | 0.91 | no  | down | 3.2E-04 | yes |
| MSTRG.19777.10 : Sin3a : A0A0G2K3H5      | 0.53  | yes | down | 4.1E-06 | yes | chr8  | intron   | last intron     | NA  | 2.55 | yes | up   | 0.09 | no  | 0.96 | no  | down | 6.2E-05 | yes |
| MSTRG.4675.1 : Gsk3b : A0A0G2JSH4        | 2.36  | yes | up   | 1.7E-04 | yes | chr11 | intron   | internal intron | NA  | 1.03 | no  | up   | 0.97 | no  | 0.98 | no  | down | 1.1E-02 | yes |
| ENSRNOT00000036156 : Gbfl1 : A0A0G2K3N1  | 0.28  | yes | down | 1.1E-05 | yes | chr1  | intron   | internal intron | NA  | 1.03 | no  | up   | 0.90 | no  | 1.05 | no  | up   | 6.1E-10 | yes |
| MSTRG.11636.2 : Larp7 : M0R7D1           | 0.06  | yes | down | 3.4E-04 | yes | chr2  | exon     | last exon       | NA  | 1.33 | no  | up   | 0.64 | no  | 1.07 | no  | up   | 2.0E-06 | yes |
| MSTRG.21168.1 : Gigyf2 : A0A096MKC0      | 0.59  | yes | down | 1.9E-05 | yes | chr9  | intron   | internal intron | NA  | 1.30 | no  | up   | 0.36 | no  | 1.01 | no  | up   | 7.0E-01 | no  |
| MSTRG.13870.9 : Plcg1 : G3V845           |       |     |      |         |     |       |          |                 |     |      |     |      |      |     |      |     |      |         |     |

|                                                |       |      |         |         |      |          |              |                 |      |      |      |      |      |      |      |     |         |         |     |
|------------------------------------------------|-------|------|---------|---------|------|----------|--------------|-----------------|------|------|------|------|------|------|------|-----|---------|---------|-----|
| MSTRG.16592.3 : Kdm1a : A0A0G2K736             | 0.26  | yes  | down    | 3.7E-04 | yes  | chr5     | intron       | internal intron | NA   | 0.59 | no   | down | 0.39 | no   | 1.01 | no  | up      | 5.0E-01 | no  |
| ENSRNOT00000079719 : Prkar2b : P12369          | 0.61  | yes  | down    | 1.6E-04 | yes  | chr6     | intron       | internal intron | NA   | 0.94 | no   | down | 0.50 | no   | 0.71 | yes | down    | 2.8E-15 | yes |
| MSTRG.14053.3 : Dido1 : D3ZWL9                 | 2.83  | yes  | up      | 7.0E-07 | yes  | chr3     | intron       | internal intron | NA   | 0.93 | no   | down | 0.88 | no   | 1.01 | no  | up      | 2.0E-01 | no  |
| ENSRNOT00000068742 : Ano6 : A0A0G2K1M7         | 3.87  | yes  | up      | 9.8E-09 | yes  | chr7     | intron       | internal intron | NA   | 0.90 | no   | down | 0.58 | no   | 0.91 | no  | down    | 2.1E-09 | yes |
| ENSRNOT00000002313 : Runx1 : Q63046            | 0.62  | yes  | down    | 5.4E-05 | yes  | chr11    | intron       | first intron    | NA   | 0.88 | no   | down | 0.66 | no   | 1.47 | yes | up      | 3.2E-10 | yes |
| MSTRG.8278.40 : Rbpms : F2Z3S5                 | 0.02  | yes  | down    | 2.6E-05 | yes  | chr16    | promoter     | Proximal        | ICP  | 0.53 | no   | down | 0.07 | no   | 1.06 | no  | up      | 4.9E-05 | yes |
| MSTRG.14342.4 : ST7 : A0A0G2KBB5               | 4.88  | yes  | up      | 1.5E-16 | yes  | chr4     | promoter     | Distal          | LCP  | 1.20 | no   | up   | 0.30 | no   | 1.14 | no  | up      | 1.4E-03 | yes |
| ENSRNOT00000089624 : Plscr1 : A0A0G2K7Q1       | 0.33  | yes  | down    | 1.3E-05 | yes  | chr8     | promoter     | Distal          | LCP  | 0.89 | no   | down | 0.23 | no   | 1.08 | no  | up      | 5.2E-06 | yes |
| MSTRG.1026.1 : Bax : Q9JKL3                    | 8.53  | yes  | up      | 7.6E-07 | yes  | chr1     | promoter     | Distal          | LCP  | 0.99 | no   | down | 0.96 | no   | 1.07 | no  | up      | 5.8E-08 | yes |
| ENSRNOT00000034567 : Tmx4 : G3V912             | 7.04  | yes  | up      | 3.9E-04 | yes  | chr3     | promoter     | Distal          | LCP  | 0.39 | yes  | down | 0.20 | no   | 0.97 | no  | down    | 6.5E-02 | no  |
| ENSRNOT00000063772 : Rad50 : G3V9X6            | 3.28  | yes  | up      | 4.1E-06 | yes  | chr10    | intron       | internal intron | NA   | 1.12 | no   | up   | 0.30 | no   | 0.95 | no  | down    | 2.3E-11 | yes |
| MSTRG.6320.2 : Cdc42bpa : G3V6C9               | 8.92  | yes  | up      | 2.1E-05 | yes  | chr13    | intron       | internal intron | NA   | 0.82 | no   | down | 0.46 | no   | 0.97 | no  | down    | 2.5E-04 | yes |
| ENSRNOT00000016558 : Ttc29 : Q6AYP3            | 0.28  | yes  | down    | 7.9E-05 | yes  | chr19    | exon         | internal exon   | NA   | 0.64 | no   | down | 0.22 | no   | 1.55 | yes | up      | 1.9E-10 | yes |
| ENSRNOT00000075967 : Gigyf2 : A0A096MKC0       | 0.59  | yes  | down    | 1.9E-05 | yes  | chr9     | intron       | internal intron | NA   | 0.93 | no   | down | 0.78 | no   | 1.01 | no  | up      | 7.0E-01 | no  |
| ENSRNOT00000002323 : Dvl3 : D4ADV8             | 0.50  | yes  | down    | 1.6E-05 | yes  | chr11    | intron       | first intron    | NA   | 1.31 | no   | up   | 0.09 | no   | 0.98 | no  | down    | 2.0E-01 | no  |
| MSTRG.8055.1 : Lsm4 : D4A2C6                   | 0.48  | yes  | down    | 3.2E-04 | yes  | chr16    | exon         | last exon       | NA   | 1.72 | no   | up   | 0.06 | no   | 0.96 | no  | down    | 2.1E-01 | no  |
| MSTRG.13558.4 : Siclec1 : A0A0G2K320           | 0.24  | yes  | down    | 6.2E-06 | yes  | chr3     | promoter     | Proximal        | LCP  | 1.10 | no   | up   | 0.76 | no   | 1.25 | yes | up      | 7.1E-13 | yes |
| ENSRNOT00000074058 : Rrm1 : Q5U2Q5             | 8.63  | yes  | up      | 2.6E-22 | yes  | chr1     | intron       | last intron     | NA   | 1.29 | no   | up   | 0.15 | no   | 1.04 | no  | up      | 2.0E-04 | yes |
| ENSRNOT000000029577 : Cnn1 : Q08290            | 3.38  | yes  | up      | 1.8E-04 | yes  | chr8     | intron       | internal intron | NA   | 0.74 | no   | down | 0.07 | no   | 1.04 | no  | up      | 1.3E-06 | yes |
| MSTRG.13466.5 : Myef2 : A0A0G2K402             | 2.63  | yes  | up      | 2.7E-04 | yes  | chr3     | promoter     | Intermediate    | LCP  | 1.08 | no   | up   | 0.49 | no   | 0.93 | no  | down    | 4.5E-09 | yes |
| MSTRG.7965.1 : Bmpr1a : Q78EA7                 | 0.29  | yes  | down    | 2.1E-04 | yes  | chr16    | intron       | internal intron | NA   | 4.37 | yes  | up   | 0.17 | no   | 0.90 | no  | down    | 9.8E-10 | yes |
| MSTRG.20839.6 : Kdele1 : B5DFA5                | 5.54  | yes  | up      | 1.1E-06 | yes  | chr9     | exon         | last exon       | NA   | 0.78 | no   | down | 0.55 | no   | 0.94 | no  | down    | 8.4E-02 | no  |
| MSTRG.4497.1 : Dopey2 : A0A0G2JXD9             | 3.39  | yes  | up      | 1.3E-40 | yes  | chr11    | intron       | internal intron | NA   | 0.90 | no   | down | 0.65 | no   | 0.98 | no  | down    | 3.1E-01 | no  |
| MSTRG.1326.1 : Picalm : A0A1B0GWW9             | 8.74  | yes  | up      | 2.1E-13 | yes  | chr1     | intron       | internal intron | NA   | 3.98 | yes  | up   | 0.01 | yes  | 1.04 | no  | up      | 1.0E-01 | no  |
| MSTRG.4716.8 : Adcy5 : G3V9G1                  | 0.16  | yes  | down    | 2.3E-10 | yes  | chr11    | intron       | internal intron | NA   | 0.81 | no   | down | 0.35 | no   | 1.00 | no  | down    | 7.6E-01 | no  |
| MSTRG.17689.1 : Golga5 : G3V6Z7                | 4.67  | yes  | up      | 4.2E-17 | yes  | chr6     | intron       | last intron     | NA   | 1.03 | no   | up   | 0.72 | no   | 1.07 | no  | up      | 2.3E-12 | yes |
| ENSRNOT00000028680 : Nomo1 : D3ZSA9            | 4.00  | yes  | up      | 3.3E-06 | yes  | chr1     | intron       | internal intron | NA   | 1.09 | no   | up   | 0.47 | no   | 1.08 | no  | up      | 1.0E-11 | yes |
| ENSRNOT000000092542 : Mapk10 : A0A0UIRRS7      | 2.61  | yes  | up      | 3.6E-06 | yes  | chr14    | intron       | first intron    | NA   | 1.00 | no   | down | 0.40 | no   | 0.56 | yes | down    | 6.7E-04 | yes |
| ENSRNOT000000086769 : Ywhah : P68511           | 0.09  | yes  | down    | 3.0E-04 | yes  | chr14    | intron       | last intron     | NA   | 0.76 | no   | down | 0.03 | yes  | 1.00 | no  | down    | 5.7E-01 | no  |
| MSTRG.97.3 : Belaf1 : B1WC16                   | 0.67  | yes  | down    | 1.3E-07 | yes  | chr1     | intron       | internal intron | NA   | 0.81 | no   | down | 0.35 | no   | 1.03 | no  | up      | 6.8E-02 | no  |
| MSTRG.5439.3 : Gusb : F1LQK8                   | 29.04 | yes  | up      | 6.5E-05 | yes  | chr12    | intron       | internal intron | NA   | 1.57 | no   | up   | 0.06 | no   | 0.97 | no  | down    | 1.8E-03 | yes |
| MSTRG.18206.6 : Cirbp : P60825                 | 0.73  | yes  | down    | 1.3E-04 | yes  | chr7     | exon         | first exon      | NA   | 0.67 | no   | down | 0.05 | yes  | 0.85 | no  | down    | 3.4E-16 | yes |
| ENSRNOT00000073950 : Dync1h1 : M0R9X8          | 0.19  | yes  | down    | 1.5E-06 | yes  | chr6     | intron       | internal intron | NA   | 1.01 | no   | up   | 0.48 | no   | 0.99 | no  | down    | 3.4E-03 | yes |
| MSTRG.9714.4 : Dync1li2 : Q5D023               | 0.17  | yes  | down    | 2.9E-04 | yes  | chr19    | intron       | last intron     | NA   | 0.60 | no   | down | 0.10 | no   | 0.99 | no  | down    | 1.1E-01 | no  |
| ENSRNOT00000012725 : Tf : P12346               | 5.10  | yes  | up      | 5.5E-06 | yes  | chr8     | intron       | first intron    | NA   | 1.07 | no   | up   | 0.37 | no   | 1.33 | yes | up      | 1.6E-08 | yes |
| MSTRG.1683.2 : Il4r : Q63257                   | 9.80  | yes  | up      | 2.9E-08 | yes  | chr1     | intron       | internal intron | NA   | 2.39 | yes  | up   | 0.10 | no   | 1.11 | no  | up      | 2.1E-05 | yes |
| MSTRG.7562.1 : Phf11b : M0RB46                 | 3.03  | yes  | up      | 2.9E-04 | yes  | chr15    | promoter     | Intermediate    | LCP  | 1.44 | no   | up   | 0.21 | no   | 1.15 | no  | up      | 2.3E-06 | yes |
| ENSRNOT00000008238 : Ppm1a : P20650            | 2.35  | yes  | up      | 3.9E-04 | yes  | chr6     | intron       | last intron     | NA   | 2.96 | yes  | up   | 0.09 | no   | 0.96 | no  | down    | 5.3E-04 | yes |
| MSTRG.17804.1 : Cdc42bbp : A0A0G2KB58          | 0.39  | yes  | down    | 3.8E-04 | yes  | chr6     | intron       | internal intron | NA   | 0.93 | no   | down | 0.61 | no   | 0.97 | no  | down    | 3.6E-07 | yes |
| MSTRG.5482.9 : Ncor2 : A0A0G2JU91              | 2.16  | yes  | up      | 1.6E-06 | yes  | chr12    | intron       | internal intron | NA   | 1.00 | no   | down | 0.90 | no   | 1.01 | no  | up      | 7.1E-01 | no  |
| MSTRG.21367.3 : Uba1 : Q5U300                  | 0     | yes  | down    | 1.9E-08 | yes  | chrX     | exon         | last exon       | NA   | 1.11 | no   | up   | 0.71 | no   | 0.93 | no  | down    | 2.8E-14 | yes |
| ENSRNOT00000006709 : Dock4 : M0R6K4            | 0.43  | yes  | down    | 2.9E-04 | yes  | chr6     | exon         | last exon       | NA   | 1.03 | no   | up   | 0.76 | no   | 0.94 | no  | down    | 8.4E-03 | yes |
| ENSRNOT000000088025 : Belaf1 : B1WC16          | 0.67  | yes  | down    | 1.3E-07 | yes  | chr1     | intron       | internal intron | NA   | 0.95 | no   | down | 0.48 | no   | 1.03 | no  | up      | 6.8E-02 | no  |
| ENSRNOT000000084758 : Arih1 : D3ZXL1           | 0.23  | yes  | down    | 8.6E-06 | yes  | chr8     | intron       | first intron    | NA   | 1.09 | no   | up   | 0.09 | no   | 0.93 | no  | down    | 1.4E-04 | yes |
| MSTRG.1974.4 : Nap114 : Q5U2Z3                 | 0.36  | yes  | down    | 7.2E-05 | yes  | chr1     | intron       | internal intron | NA   | 0.66 | no   | down | 0.03 | yes  | 0.98 | no  | down    | 3.1E-02 | yes |
| ENSRNOT00000020539 : Smndc1 : Q4QQU6           | inf   | yes  | up      | 1.3E-04 | yes  | chr1     | promoter     | Distal          | LCP  | 0.90 | no   | down | 0.77 | no   | 1.06 | no  | up      | 2.2E-04 | yes |
| MSTRG.14882.1 : Ap1f : F6Q5G6                  | 0.12  | yes  | down    | 8.1E-06 | yes  | chr4     | exon         | last exon       | NA   | 0.95 | no   | down | 0.88 | no   | 0.99 | no  | down    | 2.8E-01 | no  |
| ENSRNOT00000002126 : Acs15 : O88813            | 6.59  | yes  | up      | 1.3E-04 | yes  | chr1     | intron       | last intron     | NA   | 1.49 | no   | up   | 0.06 | no   | 1.08 | no  | up      | 2.2E-08 | yes |
| ENSRNOT00000010676 : Rcor1 : F1LXS5            | 2.75  | yes  | up      | 3.6E-04 | yes  | chr6     | intron       | internal intron | NA   | 1.33 | no   | up   | 0.65 | no   | 1.11 | no  | up      | 2.6E-06 | yes |
| MSTRG.8325.1 : Hook3 : Q7TQ77                  | 0.22  | yes  | down    | 2.1E-04 | yes  | chr16    | intron       | internal intron | NA   | 1.28 | no   | up   | 0.33 | no   | 1.01 | no  | up      | 5.0E-03 | yes |
| ENSRNOT000000081021 : Plec : F7F9U6            | 0.33  | yes  | down    | 4.2E-06 | yes  | chr7     | exon         | last exon       | NA   | 0.97 | no   | down | 0.44 | no   | 0.90 | no  | down    | 2.5E-03 | yes |
| ENSRNOT000000065028 : Dnm2 : A0A0A0MY48        | 0.11  | yes  | down    | 8.9E-11 | yes  | chr8     | intron       | first intron    | NA   | 1.07 | no   | up   | 0.46 | no   | 1.05 | no  | up      | 2.0E-08 | yes |
| ENSRNOT00000014849 : Rpl29 : P25886            | 3.86  | yes  | up      | 3.0E-04 | yes  | chr8     | intron       | first intron    | NA   | 0.83 | no   | down | 0.84 | no   | 0.98 | no  | down    | 6.0E-01 | no  |
| ENSRNOT000000064212 : Yeats2 : D3ZBV9          | 4.61  | yes  | up      | 5.1E-05 | yes  | chr11    | intron       | internal intron | NA   | 1.53 | no   | up   | 0.02 | yes  | 1.11 | no  | up      | 2.4E-05 | yes |
| MSTRG.19963.7 : Sltm : A0A0G2K904              | 0.34  | yes  | down    | 6.4E-06 | yes  | chr8     | intron       | internal intron | NA   | 0.88 | no   | down | 0.09 | no   | 0.94 | no  | down    | 2.8E-02 | yes |
| MSTRG.4992.1 : Top3b : D4A9Z2                  | 11.41 | yes  | up      | 1.2E-04 | yes  | chr11    | intron       | last intron     | NA   | 0.67 | no   | down | 0.54 | no   | 0.99 | no  | down    | 6.1E-01 | no  |
| ENSRNOT000000086441 : LOC108348175 : A0A0G2O05 | yes   | down | 4.0E-19 | yes     | chr1 | promoter | Intermediate | LCP             | 0.41 | yes  | down | 0.02 | yes  | 1.01 | no   | up  | 4.0E-01 | yes     |     |
| ENSRNOT000000081395 : Ints8 : A0A0G2K0V1       | 0.11  | yes  | down    | 2.1E-05 | yes  | chr5     | intron       | last intron     | NA   | 1.09 | no   | up   | 0.32 | no   | 1.07 | no  | up      | 1.6E-05 | no  |
| MSTRG.9900.3 : Rnaseh2a : Q5U209               | 14.16 | yes  | up      | 1.1E-05 | yes  | chr19    | intron       | last intron     | NA   | 1.32 | no   | up   | 0.43 | no   | 1.08 | no  | up      | 2.6E-05 | yes |
| MSTRG.2788.2 : Hmox2 : P23711                  | inf   | yes  | up      | 5.3E-04 | yes  | chr10    | exon         | last exon       | NA   | 1.28 | no   | up   | 0.67 | no   | 1.09 | no  | up      | 4.1E-06 | yes |
| ENSRNOT000000065224 : Thbs4 : F1LMS5           | 0.15  | yes  | down    | 4.0E-04 | yes  | chr2     | intron       | internal intron | NA   | 2.16 | yes  | up   | 0.08 | no   | 1.25 | yes | up      | 3.7E-10 | yes |
| MSTRG.20752.1 : Ptpn18 : Q4KM54                | 0     | yes  | down    | 1.9E-04 | yes  | chr9     | intron       | first intron    | NA   | 1.13 | no   | up   | 0.54 | no   | 1.20 | no  | up      | 1.2E-08 | yes |
| MSTRG.18734.1 : Der11 : F7FNS3                 | 0.48  | yes  | down    | 3.9E-05 | yes  | chr7     | exon         | last exon       | NA   | 1.35 | no   | up   | 0.48 | no   | 1.04 | no  | up      | 2.4E-03 | yes |
| MSTRG.12226.1 : Bcr : F1LXF1                   | 2.12  | yes  | up      | 1.3E-04 | yes  | chr20    | intron       | first intron    | NA   | 0.86 | no   | down | 0.25 | no   | 0.96 | no  | down    | 8.7E-05 | yes |
| MSTRG.10218.1 : Ze3h18 : Q6TQE1                | 0.03  | yes  | down    | 1.2E-11 | yes  | chr19    | promoter     | Intermediate    | LCP  | 0.79 | no   | down | 0.10 | no   | 1.02 | no  | up      | 2.3E-01 | no  |
| MSTRG.2631.1 : Calhm2 : Q5RJQ8                 | 0.13  | yes  | down    | 1.1E-04 | yes  | chr1     | intron       | first intron    | NA   | 0.90 | no   | down | 0.51 | no   | 1.02 | no  | up      | 9.8E-02 | no  |
| MSTRG.17811.3 : Mark3 : F1M836                 | 0.30  | yes  | down    | 2.6E-04 | yes  | chr6     | exon         | last exon       | NA   | 1.03 | no   | up   | 0.93 | no   | 1.10 | no  | up      | 4.1E-07 | yes |
| MSTRG.11953.3 : RT1-CE7 : D3ZLE6               | inf   | yes  | up      | 7.3E-07 | yes  | chr20    | exon         | internal exon   | NA   | 1.20 | no   | up   | 0.79 | no   | 1.22 | yes | up      | 7.3E-16 | yes |
| MSTRG.6560.4 : Hnrnpdl : A0A0G2KAZ7            | inf   | yes  | up      | 7.6E-05 | yes  | chr14    | intron       | first intron    | NA   | 0.92 | no   | down | 0.65 | no   | 0.99 | no  | down    | 4.6E-01 | no  |
| ENSRNOT000000019320 : Map1a : P34926           | 3.41  | yes  | up      | 1.8E-05 | yes  | chr3     | intron       | last intron     | NA   | 1.00 | no   | down | 0.99 | no   | 1.03 | no  | up      | 8.9E-11 | yes |
| MSTRG.7804.2 : Mycbp2 : D4A2D3                 | 0.31  | yes  | down    | 9.2E-06 | yes  | chr15    | intron       | internal intron | NA   | 1.07 | no   | up   | 0.82 | no   | 1.00 | no  | up      | 6.8E-   |     |

|                                          |       |     |      |         |     |       |          |                 |     |      |     |      |      |     |      |     |      |         |     |
|------------------------------------------|-------|-----|------|---------|-----|-------|----------|-----------------|-----|------|-----|------|------|-----|------|-----|------|---------|-----|
| MSTRG.276.1 : Arid1b : FILNP1            | 1.53  | yes | up   | 6.5E-08 | yes | chr1  | promoter | Proximal        | LCP | 1.15 | no  | up   | 0.87 | no  | 0.98 | no  | down | 1.8E-01 | no  |
| MSTRG.2839.15 : Srrm2 : A0A0G2K2M9       | 1.72  | yes | up   | 9.0E-05 | yes | chr10 | exon     | internal exon   | NA  | 1.10 | no  | up   | 0.82 | no  | 1.00 | no  | up   | 9.0E-01 | no  |
| ENSRNOT00000085132 : Vps39 : E9PT04      | inf   | yes | up   | 4.3E-04 | yes | chr3  | intron   | internal intron | NA  | 0.83 | no  | down | 0.68 | no  | 1.08 | no  | up   | 2.7E-04 | yes |
| MSTRG.14603.4 : Tax1bp1 : Q66HA4         | 8.48  | yes | up   | 1.1E-06 | yes | chr4  | exon     | last exon       | NA  | 0.57 | no  | down | 0.09 | no  | 1.04 | no  | up   | 2.0E-04 | yes |
| MSTRG.20746.1 : Bag2 : B0BN74            | 0.18  | yes | down | 4.5E-04 | yes | chr9  | promoter | Distal          | ICP | 0.89 | no  | down | 0.34 | no  | 1.05 | no  | up   | 1.1E-05 | yes |
| ENSRNOT00000089557 : Sin3a : A0A0G2K3H5  | 0.53  | yes | down | 4.1E-06 | yes | chr8  | intron   | last intron     | NA  | 0.93 | no  | down | 0.86 | no  | 0.96 | no  | down | 6.2E-05 | yes |
| MSTRG.11405.2 : Pde4dip : A0A0G2JW66     | 6.94  | yes | up   | 5.0E-08 | yes | chr2  | exon     | internal exon   | NA  | 1.39 | no  | up   | 0.02 | yes | 1.06 | no  | up   | 5.1E-04 | yes |
| ENSRNOT00000024364 : Ubap2l : E9PTR4     | 6.62  | yes | up   | 4.0E-04 | yes | chr2  | intron   | internal intron | NA  | 0.97 | no  | down | 0.49 | no  | 1.13 | no  | up   | 3.8E-12 | yes |
| MSTRG.123.6 : Epb41l2 : D3ZM69           | 0.25  | yes | down | 1.1E-12 | yes | chr1  | intron   | internal intron | NA  | 0.71 | no  | down | 0.12 | no  | 0.91 | no  | down | 8.9E-11 | yes |
| MSTRG.9435.5 : Tcerg1 : B5DEZ4           | 0.26  | yes | down | 2.8E-04 | yes | chr18 | promoter | Intermediate    | ICP | 0.85 | no  | down | 0.40 | no  | 1.02 | no  | up   | 4.4E-02 | yes |
| ENSRNOT00000088201 : Stat2 : Q5XI26      | 0.06  | yes | down | 1.0E-04 | yes | chr7  | promoter | Distal          | LCP | 1.01 | no  | up   | 0.78 | no  | 1.14 | no  | up   | 1.9E-09 | yes |
| ENSRNOT00000075474 : Ptprr : M0RB22      | 3.73  | yes | up   | 1.3E-08 | yes | chr5  | exon     | internal exon   | NA  | 1.00 | no  | down | 0.89 | no  | 1.01 | no  | up   | 5.3E-01 | no  |
| ENSRNOT00000019781 : Smurf2 : F1M3F2     | 3.77  | yes | up   | 9.3E-06 | yes | chr10 | intron   | internal intron | NA  | 1.98 | no  | up   | 0.10 | no  | 1.03 | no  | up   | 6.3E-02 | no  |
| MSTRG.6732.2 : Limch1 : F1M392           | 1.09  | no  | up   | 3.3E-04 | yes | chr14 | intron   | last intron     | NA  | 0.78 | no  | down | 0.48 | no  | 0.85 | no  | down | 1.1E-13 | yes |
| ENSRNOT00000023605 : Tpm3 : A0A140TAF0   | 0.37  | yes | down | 8.0E-05 | yes | chr2  | intron   | internal intron | NA  | 0.91 | no  | down | 0.63 | no  | 1.03 | no  | up   | 4.4E-04 | yes |
| MSTRG.5482.17 : Ncor2 : A0A0G2JU91       | 2.16  | yes | up   | 1.6E-06 | yes | chr12 | intron   | internal intron | NA  | 1.01 | no  | up   | 0.94 | no  | 1.01 | no  | up   | 7.1E-01 | no  |
| ENSRNOT00000025086 : Nup93 : Q66HC5      | 4.51  | yes | up   | 2.5E-04 | yes | chr19 | exon     | internal exon   | NA  | 1.32 | no  | up   | 0.10 | no  | 0.97 | no  | down | 1.0E-07 | yes |
| ENSRNOT00000020670 : Atp5d : G3V7Y3      | 0.12  | yes | down | 5.2E-08 | yes | chr7  | promoter | Distal          | LCP | 3.48 | yes | up   | 0.36 | no  | 0.90 | no  | down | 7.4E-12 | yes |
| ENSRNOT00000007427 : Ybx3 : D4A0L4       | 0.20  | yes | down | 8.8E-05 | yes | chr4  | intron   | internal intron | NA  | 0.97 | no  | down | 0.91 | no  | 1.24 | yes | up   | 8.2E-11 | yes |
| ENSRNOT00000093684 : Nup214 : M0RBV9     | 0.13  | yes | down | 4.7E-04 | yes | chr3  | intron   | internal intron | NA  | 1.05 | no  | up   | 0.50 | no  | 1.01 | no  | up   | 5.4E-01 | no  |
| MSTRG.13080.3 : Lnpk : A0JN29            | 3.42  | yes | up   | 1.2E-11 | yes | chr3  | intron   | internal intron | NA  | 0.87 | no  | down | 0.50 | no  | 0.96 | no  | down | 2.6E-04 | yes |
| MSTRG.7561.8 : Phf11b : M0RB46           | 3.03  | yes | up   | 2.9E-04 | yes | chr15 | promoter | Intermediate    | LCP | 1.50 | no  | up   | 0.12 | no  | 1.15 | no  | up   | 2.3E-06 | yes |
| MSTRG.2579.4 : Sfxn3 : Q9JHY2            | 0.39  | yes | down | 7.8E-05 | yes | chr1  | intron   | internal intron | NA  | 0.59 | no  | down | 0.29 | no  | 0.98 | no  | down | 7.5E-03 | yes |
| MSTRG.7561.11 : Phf11b : M0RB46          | 3.03  | yes | up   | 2.9E-04 | yes | chr15 | promoter | Intermediate    | LCP | 1.43 | no  | up   | 0.34 | no  | 1.15 | no  | up   | 2.3E-06 | yes |
| ENSRNOT00000005031 : Hmox2 : P23711      | inf   | yes | up   | 5.3E-04 | yes | chr10 | exon     | last exon       | NA  | 0.95 | no  | down | 0.57 | no  | 1.09 | no  | up   | 4.1E-06 | yes |
| MSTRG.18475.1 : Pawr : G3V6S1            | 4.33  | yes | up   | 2.3E-06 | yes | chr7  | intron   | last intron     | NA  | 0.88 | no  | down | 0.60 | no  | 1.06 | no  | up   | 9.6E-07 | yes |
| MSTRG.12337.6 : Sgpl1 : Q8CHN6           | 0.20  | yes | down | 6.8E-07 | yes | chr20 | intron   | internal intron | NA  | 1.20 | no  | up   | 0.46 | no  | 1.12 | no  | up   | 5.6E-16 | yes |
| MSTRG.17785.1 : Dync1h1 : M0R9X8         | 0.19  | yes | down | 1.5E-06 | yes | chr6  | intron   | internal intron | NA  | 0.63 | no  | down | 0.53 | no  | 0.99 | no  | down | 3.4E-03 | yes |
| MSTRG.21023.6 : Fn1 : F1LST1             | 0.11  | yes | down | 7.7E-11 | yes | chr9  | intron   | internal intron | NA  | 7.56 | yes | up   | 0.49 | no  | 1.27 | yes | up   | 4.1E-20 | yes |
| ENSRNOT00000065111 : Bcar3 : D3ZAZ5      | 3.50  | yes | up   | 1.2E-08 | yes | chr2  | intron   | internal intron | NA  | 1.23 | no  | up   | 0.59 | no  | 1.06 | no  | up   | 1.2E-02 | yes |
| MSTRG.15546.1 : Asph : A0A096MKE0        | 2.56  | yes | up   | 9.8E-06 | yes | chr5  | intron   | internal intron | NA  | 1.07 | no  | up   | 0.83 | no  | 0.99 | no  | down | 1.3E-01 | no  |
| MSTRG.5482.24 : Ncor2 : A0A0G2JU91       | 2.16  | yes | up   | 1.6E-06 | yes | chr12 | intron   | internal intron | NA  | 1.20 | no  | up   | 0.54 | no  | 1.01 | no  | up   | 7.1E-01 | no  |
| MSTRG.13963.2 : Ptgis : Q62969           | 0.55  | yes | down | 6.0E-05 | yes | chr3  | intron   | internal intron | NA  | 0.98 | no  | down | 0.98 | no  | 0.99 | no  | down | 7.4E-02 | no  |
| ENSRNOT00000072698 : Mest : M0R830       | 0.59  | yes | down | 9.4E-06 | yes | chr4  | intron   | first intron    | NA  | 0.64 | no  | down | 0.17 | no  | 0.86 | no  | down | 1.4E-06 | yes |
| MSTRG.10288.1 : Gnpat : Q9ES71           | inf   | yes | up   | 4.2E-12 | yes | chr19 | exon     | last exon       | NA  | 0.95 | no  | down | 0.52 | no  | 1.10 | no  | up   | 6.9E-05 | yes |
| MSTRG.8033.3 : Slc27a1 : Q6GMM8          | 0.26  | yes | down | 5.6E-15 | yes | chr16 | intron   | internal intron | NA  | 1.20 | no  | up   | 0.68 | no  | 0.99 | no  | down | 2.5E-01 | no  |
| MSTRG.5548.1 : P2rx4 : P51577            | 2.45  | yes | up   | 6.7E-18 | yes | chr12 | intron   | internal intron | NA  | 0.79 | no  | down | 0.60 | no  | 1.15 | no  | up   | 7.4E-08 | yes |
| ENSRNOT00000066950 : Dapk1 : F1LNN8      | 0.35  | yes | down | 1.5E-04 | yes | chr17 | intron   | internal intron | NA  | 0.78 | no  | down | 0.42 | no  | 0.96 | no  | down | 1.0E-01 | no  |
| MSTRG.15231.9 : Tspan9 : D4AAV9          | 0.41  | yes | down | 1.4E-09 | yes | chr4  | exon     | last exon       | NA  | 1.45 | no  | up   | 0.22 | no  | 0.96 | no  | down | 2.4E-05 | yes |
| ENSRNOT00000023628 : Hspa4 : F1LRV4      | 0.10  | yes | down | 2.8E-04 | yes | chr10 | intron   | internal intron | NA  | 1.15 | no  | up   | 0.14 | no  | 0.69 | yes | down | 5.3E-07 | yes |
| MSTRG.15231.11 : Tspan9 : D4AAV9         | 0.41  | yes | down | 1.4E-09 | yes | chr4  | exon     | last exon       | NA  | 0.46 | yes | down | 0.45 | no  | 0.96 | no  | down | 2.4E-05 | yes |
| MSTRG.9900.5 : Rnaseh2a : Q5U209         | 14.16 | yes | up   | 1.1E-05 | yes | chr19 | intron   | last intron     | NA  | 1.42 | no  | up   | 0.06 | no  | 1.08 | no  | up   | 2.6E-05 | yes |
| MSTRG.17422.5 : Ppmla : P20650           | 2.35  | yes | up   | 3.9E-04 | yes | chr6  | intron   | last intron     | NA  | 0.90 | no  | down | 0.88 | no  | 0.96 | no  | down | 5.3E-04 | yes |
| ENSRNOT00000007300 : Snx6 : B5DEY8       | 21.45 | yes | up   | 3.0E-04 | yes | chr6  | exon     | internal exon   | NA  | 0.97 | no  | down | 0.82 | no  | 0.97 | no  | down | 1.8E-09 | yes |
| MSTRG.20878.6 : Gls : A0A0G2KAN7         | 0.05  | yes | down | 1.5E-13 | yes | chr9  | intron   | first intron    | NA  | 1.14 | no  | up   | 0.89 | no  | 1.09 | no  | up   | 8.3E-03 | yes |
| MSTRG.19538.13 : Nfrkb : D4A421          | 0.58  | yes | down | 1.3E-05 | yes | chr8  | intron   | internal intron | NA  | 1.20 | no  | up   | 0.25 | no  | 0.89 | no  | down | 2.5E-03 | yes |
| MSTRG.8278.18 : Rbpms : F2Z3S5           | 0.02  | yes | down | 2.6E-05 | yes | chr16 | promoter | Proximal        | ICP | 1.27 | no  | up   | 0.54 | no  | 1.06 | no  | up   | 4.9E-05 | yes |
| ENSRNOT00000004524 : Rbfox3 : A0A0G2K2J4 | 0.25  | yes | down | 5.8E-04 | yes | chr10 | exon     | internal exon   | NA  | 1.00 | no  | down | 0.47 | no  | 0.94 | no  | down | 8.2E-05 | yes |
| ENSRNOT00000028246 : Atp8b2 : D4A509     | 0.14  | yes | down | 3.1E-04 | yes | chr2  | exon     | first exon      | NA  | 0.90 | no  | down | 0.76 | no  | 0.92 | no  | down | 5.0E-03 | yes |
| MSTRG.5704.2 : RGD1306556 : A0A0G2JZ88   | 0.24  | yes | down | 1.7E-04 | yes | chr12 | exon     | internal exon   | NA  | 0.58 | no  | down | 0.40 | no  | 1.28 | yes | up   | 1.1E-07 | yes |
| ENSRNOT00000093370 : Mycbp2 : A0A1W2Q6I3 | 0.31  | yes | down | 9.2E-06 | yes | chr15 | intron   | internal intron | NA  | 0.94 | no  | down | 0.81 | no  | 1.00 | no  | up   | 8.8E-01 | no  |
| MSTRG.20927.1 : Aox1 : F1LRQ1            | 0.36  | yes | down | 1.5E-07 | yes | chr9  | intron   | internal intron | NA  | 0.71 | no  | down | 0.43 | no  | 0.73 | yes | down | 3.5E-17 | yes |
| ENSRNOT00000092223 : Atad2b : A0A096MKA5 | 3.51  | yes | up   | 9.0E-07 | yes | chr6  | intron   | internal intron | NA  | 0.96 | no  | down | 0.45 | no  | 1.15 | no  | up   | 9.1E-06 | yes |
| ENSRNOT00000078991 : Ptc4 : D3ZGM1       | 3.88  | yes | up   | 4.1E-35 | yes | chr4  | intron   | internal intron | NA  | 0.97 | no  | down | 0.96 | no  | 0.98 | no  | down | 3.1E-01 | no  |
| MSTRG.13963.6 : Ptgis : Q62969           | 0.55  | yes | down | 6.0E-05 | yes | chr3  | intron   | internal intron | NA  | 2.35 | yes | up   | 0.48 | no  | 0.99 | no  | down | 7.4E-02 | no  |
| MSTRG.6919.4 : Cpz : A0A0G2JSJ7          | 3.01  | yes | up   | 1.1E-05 | yes | chr14 | intron   | internal intron | NA  | 1.45 | no  | up   | 0.49 | no  | 1.08 | no  | up   | 5.1E-02 | no  |
| ENSRNOT00000092086 : Picalm : Q66WT9     | 8.74  | yes | up   | 2.1E-13 | yes | chr1  | intron   | internal intron | NA  | 0.60 | no  | down | 0.06 | no  | 1.45 | yes | up   | 1.6E-10 | yes |
| MSTRG.11265.1 : Ubap2l : E9PTR4          | 6.62  | yes | up   | 4.0E-04 | yes | chr2  | intron   | internal intron | NA  | 2.12 | yes | up   | 0.19 | no  | 1.13 | no  | up   | 3.8E-12 | yes |
| MSTRG.1731.7 : Tbc1d10b : D3ZSY8         | 1.59  | yes | up   | 2.7E-04 | yes | chr1  | intron   | internal intron | NA  | 1.08 | no  | up   | 0.89 | no  | 0.99 | no  | down | 3.1E-01 | no  |
| ENSRNOT00000022746 : Gramd4 : F1LYJ8     | 0.57  | yes | down | 9.4E-05 | yes | chr7  | intron   | internal intron | NA  | 0.78 | no  | down | 0.53 | no  | 1.32 | yes | up   | 2.0E-09 | yes |
| MSTRG.12403.2 : Msl3l2 : Q6AYG1          | 0.29  | yes | down | 7.4E-06 | yes | chr20 | exon     | first exon      | NA  | 0.75 | no  | down | 0.44 | no  | 0.89 | no  | down | 2.3E-05 | yes |
| MSTRG.19194.6 : Hdac7 : A0A0G2K6B1       | 1.57  | yes | up   | 6.8E-05 | yes | chr7  | intron   | internal intron | NA  | 1.20 | no  | up   | 0.14 | no  | 0.99 | no  | down | 6.7E-01 | no  |
| MSTRG.19194.7 : Hdac7 : A0A0G2K6B1       | 1.57  | yes | up   | 6.8E-05 | yes | chr7  | intron   | internal intron | NA  | 0.90 | no  | down | 0.61 | no  | 0.99 | no  | down | 6.7E-01 | no  |
| ENSRNOT00000011808 : Tmem97 : Q5U3Y7     | 0.12  | yes | down | 2.2E-04 | yes | chr10 | promoter | Distal          | LCP | 1.86 | no  | up   | 0.41 | no  | 0.91 | no  | down | 2.5E-11 | yes |
| MSTRG.21039.6 : Tns1 : F1LN42            | 0.09  | yes | down | 2.0E-04 | yes | chr9  | intron   | last intron     | NA  | 0.77 | no  | down | 0.74 | no  | 0.86 | no  | down | 7.8E-19 | yes |
| MSTRG.611.2 : Tomm40 : G3V8F5            | 0.23  | yes | down | 3.2E-04 | yes | chr1  | promoter | Distal          | LCP | 0.57 | no  | down | 0.59 | no  | 1.06 | no  | up   | 1.1E-05 | yes |
| MSTRG.16755.3 : Kif1b : A0A0G2KA12       | 3.65  | yes | up   | 7.4E-05 | yes | chr5  | intron   | internal intron | NA  | 1.13 | no  | up   | 0.03 | yes | 1.05 | no  | up   | 6.5E-02 | no  |
| MSTRG.97.8 : Bclaf1 : B1WC16             | 0.67  | yes | down | 1.3E-07 | yes | chr1  | intron   | internal intron | NA  | 1.52 | no  | up   | 0.16 | no  | 1.03 | no  | up   | 6.8E-02 | no  |
| MSTRG.18210.1 : Stk11 : A0A0H2UI02       | 0.18  | yes | down | 9.1E-05 | yes | chr7  | exon     | last exon       | NA  | 0.93 | no  | down | 0.62 | no  | 0.88 | no  | down | 1.8E-03 | yes |
| ENSRNOT00000046273 : Atp2b4 : Q64542     | 2.31  | yes | up   | 1.3E-05 | yes | chr13 | intron   | internal intron | NA  | 1.01 | no  | up   | 0.89 | no  | 0.68 | yes | down | 2.6E-19 | yes |
| MSTRG.9417.1 : Nr3c1 : P06536            | 0.27  | yes | down | 1.2E-04 | yes | chr18 | exon     | first exon      | NA  | 0.66 | no  | down | 0.66 | no  | 0.91 | no  | down | 1.6E-10 |     |

|                                          |       |     |      |         |     |       |          |                 |     |      |     |      |      |     |      |     |      |         |     |
|------------------------------------------|-------|-----|------|---------|-----|-------|----------|-----------------|-----|------|-----|------|------|-----|------|-----|------|---------|-----|
| ENSRNOT00000033719 : Trex1 : Q5BK16      | 0.35  | yes | down | 1.1E-04 | yes | chr8  | promoter | Distal          | LCP | 0.44 | yes | down | 0.16 | no  | 1.21 | yes | up   | 5.1E-11 | yes |
| MSTRG.12174.5 : Col18a1 : F1LR02         | 0.22  | yes | down | 4.1E-11 | yes | chr20 | exon     | internal exon   | NA  | 0.80 | no  | down | 0.57 | no  | 1.03 | no  | up   | 3.6E-07 | yes |
| MSTRG.20920.4 : Maip1 : Q6AY04           | 27.81 | yes | up   | 1.4E-21 | yes | chr9  | promoter | Intermediate    | ICP | 0.70 | no  | down | 0.36 | no  | 0.87 | no  | down | 5.5E-04 | yes |
| MSTRG.13195.3 : Arhgap1 : D4A6C5         | 3.73  | yes | up   | 1.8E-11 | yes | chr3  | intron   | internal intron | NA  | 1.24 | no  | up   | 0.67 | no  | 1.04 | no  | up   | 1.7E-04 | yes |
| ENSRNOT00000092976 : Arid1b : F1LNP1     | 1.53  | yes | up   | 6.5E-08 | yes | chr1  | promoter | Proximal        | LCP | 1.84 | no  | up   | 0.23 | no  | 0.98 | no  | down | 1.8E-01 | no  |
| MSTRG.4525.9 : Mx1 : Q499S4              | 3.65  | yes | up   | 1.1E-13 | yes | chr11 | intron   | internal intron | NA  | 2.43 | yes | up   | 0.33 | no  | 1.36 | yes | up   | 1.2E-13 | yes |
| MSTRG.21176.3 : Inpp5d : F1M981          | 0.08  | yes | down | 9.9E-05 | yes | chr9  | intron   | internal intron | NA  | 0.71 | no  | down | 0.20 | no  | 1.08 | no  | up   | 3.1E-05 | yes |
| MSTRG.8278.10 : Rbpms : F2Z3S5           | 0.02  | yes | down | 2.6E-05 | yes | chr16 | promoter | Proximal        | ICP | 0.82 | no  | down | 0.64 | no  | 1.06 | no  | up   | 4.9E-05 | yes |
| MSTRG.9425.3 : Nr3c1 : P06536            | 0.27  | yes | down | 1.2E-04 | yes | chr18 | exon     | first exon      | NA  | 0.95 | no  | down | 0.72 | no  | 0.91 | no  | down | 1.6E-10 | yes |
| ENSRNOT00000049292 : Kalrn : P97924      | 1.54  | yes | up   | 9.1E-07 | yes | chr11 | exon     | last exon       | NA  | 0.93 | no  | down | 0.53 | no  | 1.04 | no  | up   | 1.6E-04 | yes |
| ENSRNOT00000006403 : Rock2 : F1LQT3      | 0.10  | yes | down | 2.0E-24 | yes | chr6  | intron   | internal intron | NA  | 1.11 | no  | up   | 0.85 | no  | 0.97 | no  | down | 1.9E-04 | yes |
| ENSRNOT00000092645 : Srsf3 : A0A0U1RRV7  | 4.40  | yes | up   | 1.5E-08 | yes | chr20 | intron   | internal intron | NA  | 0.98 | no  | down | 0.86 | no  | 0.94 | no  | down | 5.5E-08 | yes |
| ENSRNOT00000003437 : Pds5a : A4L9P7      | 1.26  | yes | up   | 1.3E-13 | yes | chr14 | exon     | last exon       | NA  | 1.17 | no  | up   | 0.04 | yes | 1.01 | no  | up   | 2.7E-01 | no  |
| ENSRNOT00000067875 : Spp1 : P08721       | 29.54 | yes | up   | 1.8E-44 | yes | chr14 | exon     | last exon       | NA  | 7.36 | yes | up   | 0.06 | no  | 1.32 | yes | up   | 5.2E-14 | yes |
| MSTRG.2881.12 : Pkd1 : Q9ERV0            | inf   | yes | up   | 6.6E-05 | yes | chr10 | intron   | internal intron | NA  | 1.15 | no  | up   | 0.62 | no  | 1.19 | no  | up   | 9.8E-07 | yes |
| ENSRNOT00000089305 : Actn4 : Q9QXQ0      | 0.43  | yes | down | 2.1E-04 | yes | chr1  | intron   | internal intron | NA  | 1.00 | no  | down | 0.99 | no  | 1.01 | no  | up   | 3.9E-03 | yes |
| MSTRG.1443.11 : Arap1 : F1LM60           | 2.71  | yes | up   | 3.3E-04 | yes | chr1  | intron   | first intron    | NA  | 1.36 | no  | up   | 0.09 | no  | 0.99 | no  | down | 2.5E-02 | yes |
| ENSRNOT00000076879 : Selp : A0A096MK10   | inf   | yes | up   | 7.4E-05 | yes | chr13 | promoter | Distal          | LCP | 2.15 | yes | up   | 0.27 | no  | 0.93 | no  | down | 6.5E-03 | yes |
| MSTRG.9435.8 : Tceerg1 : B5DEZ4          | 0.26  | yes | down | 2.8E-04 | yes | chr18 | promoter | Intermediate    | ICP | 1.30 | no  | up   | 0.09 | no  | 1.02 | no  | up   | 4.4E-02 | yes |
| MSTRG.21427.2 : Rbm3 : Q925G0            | 5.50  | yes | up   | 1.2E-04 | yes | chrX  | intron   | first intron    | NA  | 0.88 | no  | down | 0.75 | no  | 1.28 | yes | up   | 1.7E-10 | yes |
| ENSRNOT00000024187 : Ces1f : M0R7R1      | 0.26  | yes | down | 2.8E-08 | yes | chr19 | intron   | internal intron | NA  | 0.95 | no  | down | 0.74 | no  | 0.86 | no  | down | 3.2E-11 | yes |
| MSTRG.15096.5 : Caena1c : F1MA84         | 4.75  | yes | up   | 4.3E-04 | yes | chr4  | intron   | internal intron | NA  | 0.81 | no  | down | 0.46 | no  | 0.97 | no  | down | 2.7E-02 | yes |
| ENSRNOT00000077443 : Slc27a6 : D4A2B8    | 0.27  | yes | down | 1.3E-05 | yes | chr18 | intron   | internal intron | NA  | 1.00 | no  | down | 0.99 | no  | 1.07 | no  | up   | 2.7E-02 | yes |
| ENSRNOT00000080038 : Ylpm1 : A0A0G2K678  | 0.14  | yes | down | 2.3E-07 | yes | chr6  | intron   | internal intron | NA  | 0.93 | no  | down | 0.63 | no  | 1.02 | no  | up   | 1.8E-03 | yes |
| MSTRG.19503.1 : Anln : M0RDG0            | 0.78  | yes | down | 4.3E-04 | yes | chr8  | intron   | internal intron | NA  | 1.00 | no  | down | 1.00 | no  | 0.97 | no  | down | 9.1E-01 | no  |
| MSTRG.1683.6 : Il4r : Q63257             | 9.80  | yes | up   | 2.9E-08 | yes | chr1  | intron   | internal intron | NA  | 1.55 | no  | up   | 0.43 | no  | 1.11 | no  | up   | 2.1E-05 | yes |
| MSTRG.10589.5 : Itga1 : P18614           | 0.09  | yes | down | 9.6E-08 | yes | chr2  | intron   | internal intron | NA  | 1.73 | no  | up   | 0.05 | yes | 0.81 | yes | down | 3.6E-17 | yes |
| MSTRG.12973.3 : Rbms1 : A0A0G2K4R7       | 0     | yes | down | 3.3E-05 | yes | chr3  | intron   | internal intron | NA  | 1.36 | no  | up   | 0.44 | no  | 0.97 | no  | down | 1.2E-01 | no  |
| ENSRNOT00000024452 : Lactb : D3ZFJ6      | 4.28  | yes | up   | 2.7E-14 | yes | chr8  | exon     | last exon       | NA  | 0.97 | no  | down | 0.74 | no  | 1.12 | no  | up   | 4.3E-10 | yes |
| ENSRNOT00000056862 : Sema4a : A0A1B0GWV9 | 3.09  | yes | up   | 1.9E-04 | yes | chr2  | promoter | Intermediate    | LCP | 1.54 | no  | up   | 0.03 | yes | 1.07 | no  | up   | 2.4E-05 | yes |
| ENSRNOT00000067085 : Cd59 : P27274       | 5.87  | yes | up   | 3.8E-04 | yes | chr3  | exon     | last exon       | NA  | 1.38 | no  | up   | 0.02 | yes | 0.93 | no  | down | 5.0E-05 | yes |
| MSTRG.13466.6 : Myef2 : A0A0G2K402       | 2.63  | yes | up   | 2.7E-04 | yes | chr3  | promoter | Intermediate    | LCP | 0.78 | no  | down | 0.43 | no  | 0.93 | no  | down | 4.5E-09 | yes |
| ENSRNOT00000028188 : Ddb1 : G3V8T4       | inf   | yes | up   | 1.9E-05 | yes | chr1  | intron   | internal intron | NA  | 1.10 | no  | up   | 0.45 | no  | 0.97 | no  | down | 4.7E-09 | yes |
| ENSRNOT00000068711 : Kihl22 : D3ZZC3     | 2.85  | yes | up   | 3.5E-06 | yes | chr11 | intron   | internal intron | NA  | 1.61 | no  | up   | 0.08 | no  | 0.98 | no  | down | 1.1E-01 | no  |
| ENSRNOT00000018114 : Ddx41 : B2RYL8      | 9.95  | yes | up   | 1.6E-09 | yes | chr17 | exon     | last exon       | NA  | 1.04 | no  | up   | 0.66 | no  | 1.02 | no  | up   | 2.7E-01 | no  |
| ENSRNOT00000001564 : Ndufv3 : G3V644     | 0     | yes | down | 1.9E-04 | yes | chr20 | intron   | first intron    | NA  | 1.04 | no  | up   | 0.75 | no  | 1.00 | no  | up   | 9.0E-01 | no  |
| ENSRNOT00000023145 : Cep192 : D4A3X0     | 4.22  | yes | up   | 1.3E-12 | yes | chr18 | intron   | internal intron | NA  | 1.00 | no  | down | 0.48 | no  | 0.95 | no  | down | 9.1E-04 | yes |
| MSTRG.14075.4 : Dnajc5 : A0A0G2JX56      | 0.30  | yes | down | 1.1E-06 | yes | chr3  | promoter | Intermediate    | HCP | 0.52 | no  | down | 0.05 | yes | 0.89 | no  | down | 4.0E-08 | yes |
| ENSRNOT00000079796 : Dpt : B2RZ77        | 6.14  | yes | up   | 2.8E-04 | yes | chr13 | exon     | last exon       | NA  | 0.52 | no  | down | 0.20 | no  | 0.85 | no  | down | 3.5E-10 | yes |
| MSTRG.20878.3 : Glis : A0A0G2KAN7        | 0.05  | yes | down | 1.5E-13 | yes | chr9  | intron   | first intron    | NA  | 1.28 | no  | up   | 0.55 | no  | 1.09 | no  | up   | 8.3E-03 | yes |
| ENSRNOT00000025664 : Stx5 : Q08851       | 0     | yes | down | 9.9E-06 | yes | chr1  | exon     | first exon      | NA  | 1.00 | no  | down | 1.00 | no  | 1.01 | no  | up   | 5.9E-01 | no  |
| MSTRG.19221.1 : Kmt2d : A0A0G2JVD6       | 6.53  | yes | up   | 2.1E-09 | yes | chr7  | exon     | last exon       | NA  | 0.74 | no  | down | 0.45 | no  | 1.03 | no  | up   | 3.5E-02 | yes |
| ENSRNOT00000089229 : Golim4 : D3ZM57     | 0.34  | yes | down | 3.2E-04 | yes | chr2  | intron   | internal intron | NA  | 1.07 | no  | up   | 0.67 | no  | 0.55 | yes | down | 1.1E-01 | no  |
| ENSRNOT00000064951 : Pds5b : D3ZU56      | 0.26  | yes | down | 2.1E-04 | yes | chr12 | promoter | Intermediate    | LCP | 1.00 | no  | down | 0.84 | no  | 0.96 | no  | down | 4.7E-06 | yes |
| MSTRG.11582.3 : Palmd : Q4KM62           | 0.16  | yes | down | 7.2E-05 | yes | chr2  | promoter | Distal          | LCP | 0.79 | no  | down | 0.08 | no  | 0.77 | yes | down | 4.3E-06 | yes |
| ENSRNOT00000001207 : Alox5ap : P20291    | 3.07  | yes | up   | 3.3E-04 | yes | chr12 | intron   | first intron    | NA  | 1.73 | no  | up   | 0.25 | no  | 0.96 | no  | down | 8.4E-03 | yes |
| ENSRNOT00000086114 : Itga1 : P18614      | 0.09  | yes | down | 9.6E-08 | yes | chr2  | intron   | internal intron | NA  | 0.88 | no  | down | 0.48 | no  | 0.81 | yes | down | 3.6E-17 | yes |
| MSTRG.14711.1 : Mat2a : F1LRB8           | 0.10  | yes | down | 1.4E-04 | yes | chr4  | exon     | last exon       | NA  | 0.82 | no  | down | 0.60 | no  | 0.99 | no  | down | 1.5E-01 | no  |
| ENSRNOT00000083701 : Prom1 : Q9JI49      | 8.32  | yes | up   | 2.4E-09 | yes | chr14 | intron   | internal intron | NA  | 0.82 | no  | down | 0.50 | no  | 0.87 | no  | down | 1.5E-05 | yes |
| ENSRNOT00000012622 : Ptdc3 : D3ZGM1      | 3.88  | yes | up   | 4.1E-35 | yes | chr4  | intron   | internal intron | NA  | 0.78 | no  | down | 0.54 | no  | 0.98 | no  | down | 3.1E-01 | no  |
| MSTRG.19956.4 : Myof2 : Q63356           | 3.15  | yes | up   | 9.4E-05 | yes | chr8  | intron   | first intron    | NA  | 1.64 | no  | up   | 0.48 | no  | 1.03 | no  | up   | 1.7E-02 | yes |
| MSTRG.15231.1 : Tspan9 : D4AAV9          | 0.41  | yes | down | 1.4E-09 | yes | chr4  | exon     | last exon       | NA  | 1.20 | no  | up   | 0.63 | no  | 0.96 | no  | down | 2.4E-05 | yes |
| ENSRNOT00000075967 : Gigyf2 : A0A096MJ14 | 0.59  | yes | down | 1.9E-05 | yes | chr9  | intron   | internal intron | NA  | 0.93 | no  | down | 0.78 | no  | 1.31 | yes | up   | 2.3E-10 | yes |
| MSTRG.18880.6 : Plec : Q6S395            | 0.33  | yes | down | 4.2E-06 | yes | chr7  | exon     | last exon       | NA  | 0.59 | no  | down | 0.48 | no  | 1.03 | no  | up   | 2.2E-01 | no  |
| MSTRG.10163.3 : Cdh13 : Q8R490           | 2.07  | yes | up   | 3.3E-06 | yes | chr19 | promoter | Intermediate    | LCP | 1.24 | no  | up   | 0.55 | no  | 0.83 | yes | down | 2.3E-16 | yes |
| MSTRG.15469.3 : Tram1 : Q5XI41           | 3.29  | yes | up   | 2.9E-05 | yes | chr5  | exon     | last exon       | NA  | 0.52 | no  | down | 0.45 | no  | 1.13 | no  | up   | 1.2E-09 | yes |
| MSTRG.20742.5 : Dst : D3ZC56             | 0.35  | yes | down | 1.3E-05 | yes | chr9  | intron   | internal intron | NA  | 1.35 | no  | up   | 0.47 | no  | 1.03 | no  | up   | 7.3E-04 | yes |
| ENSRNOT000000065181 : Atp2a3 : G3V9U7    | inf   | yes | up   | 2.1E-05 | yes | chr10 | intron   | internal intron | NA  | 0.98 | no  | down | 0.59 | no  | 0.77 | yes | down | 1.7E-16 | yes |
| ENSRNOT00000018711 : Cap1 : Q08163       | 0.21  | yes | down | 1.6E-07 | yes | chr5  | intron   | internal intron | NA  | 2.33 | yes | up   | 0.00 | yes | 0.94 | no  | down | 1.0E-08 | yes |
| MSTRG.19329.4 : Atf7 : B0BMY0            | 0.38  | yes | down | 7.2E-06 | yes | chr7  | intron   | internal intron | NA  | 0.34 | yes | down | 0.17 | no  | 1.00 | no  | down | 9.7E-01 | no  |
| MSTRG.6862.1 : C1qtnf7 : B2RYB7          | 3.60  | yes | up   | 9.8E-06 | yes | chr14 | exon     | last exon       | NA  | 0.87 | no  | down | 0.36 | no  | 0.87 | no  | down | 2.3E-09 | yes |
| ENSRNOT00000075996 : Dpt : B2RZ77        | 6.14  | yes | up   | 2.8E-04 | yes | chr13 | exon     | last exon       | NA  | 0.52 | no  | down | 0.02 | yes | 0.85 | no  | down | 3.5E-10 | yes |
| MSTRG.2561.2 : Chuk : B5DF32             | 24.13 | yes | up   | 2.0E-05 | yes | chr1  | intron   | internal intron | NA  | 1.09 | no  | up   | 0.55 | no  | 0.90 | no  | down | 8.1E-05 | yes |
| MSTRG.1783.8 : Tgfb1l1 : Q99PD6          | 3.08  | yes | up   | 7.2E-05 | yes | chr1  | intron   | internal intron | NA  | 0.85 | no  | down | 0.53 | no  | 1.06 | no  | up   | 1.6E-04 | yes |
| ENSRNOT00000089683 : Ylpm1 : A0A0G2K678  | 0.14  | yes | down | 2.3E-07 | yes | chr6  | intron   | internal intron | NA  | 0.93 | no  | down | 0.60 | no  | 1.02 | no  | up   | 1.8E-03 | yes |
| ENSRNOT00000020402 : Sae1 : Q6AXQ0       | 6.24  | yes | up   | 9.5E-08 | yes | chr1  | intron   | internal intron | NA  | 0.99 | no  | down | 0.83 | no  | 0.99 | no  | down | 1.2E-02 | yes |
| ENSRNOT00000088619 : Rbms2 : Q4QR81      | 0.04  | yes | down | 2.6E-23 | yes | chr7  | exon     | last exon       | NA  | 0.84 | no  | down | 0.82 | no  | 1.14 | no  | up   | 2.7E-10 | yes |
| ENSRNOT00000056592 : Pabpc4 : G3V9N0     | 15.58 | yes | up   | 1.8E-05 | yes | chr5  | intron   | first intron    | NA  | 1.18 | no  | up   | 0.27 | no  | 1.10 | no  | up   | 6.8E-12 | yes |
| ENSRNOT00000008705 : Yipf6 : A0A096MJG6  | inf   | yes | up   | 3.8E-06 | yes | chrX  | intron   | first intron    | NA  | 1.11 | no  | up   | 0.62 | no  | 1.03 | no  | up   | 1.9E-01 | no  |
| ENSRNOT00000088138 : Acaca : P11497      | 0.15  | yes | down | 3.0E-04 | yes | chr10 | intron   | internal intron | NA  | 0.93 | no  | down | 0.77 | no  | 0.97 | no  | down | 3.1E-04 | yes |
| ENSRNOT00000020581 : Dnajc5 : A0A0G2JX56 | 0.30  | yes | down | 1.1E-06 | yes | chr3  | promoter | Intermediate    | HCP | 0.99 | no  | down | 0.50 | no  | 0.89 | no  | down |         |     |

|                                           |       |     |      |         |     |       |          |                 |     |      |     |      |      |     |      |     |      |         |     |
|-------------------------------------------|-------|-----|------|---------|-----|-------|----------|-----------------|-----|------|-----|------|------|-----|------|-----|------|---------|-----|
| ENSRNOT00000027264 : Cdc5l : O08837       | 4.40  | yes | up   | 1.7E-04 | yes | chr9  | intron   | internal intron | NA  | 1.04 | no  | up   | 0.57 | no  | 1.05 | no  | up   | 3.5E-05 | yes |
| MSTRG.16609.5 : Ece1 : Q6IN10             | 0.58  | yes | down | 9.3E-05 | yes | chr5  | intron   | internal intron | NA  | 0.21 | yes | down | 0.45 | no  | 1.14 | no  | up   | 8.3E-15 | yes |
| MSTRG.21023.9 : Fn1 : F1LST1              | 0.11  | yes | down | 7.7E-11 | yes | chr9  | intron   | internal intron | NA  | 0.17 | yes | down | 0.09 | no  | 1.27 | yes | up   | 4.1E-20 | yes |
| MSTRG.1545.1 : Sbf2 : B5DEJ9              | 4.77  | yes | up   | 8.9E-06 | yes | chr1  | intron   | internal intron | NA  | 1.67 | no  | up   | 0.56 | no  | 1.03 | no  | up   | 9.5E-02 | no  |
| MSTRG.11223.8 : Fdps : F1LND7             | inf   | yes | up   | 2.2E-05 | yes | chr2  | exon     | last exon       | NA  | 1.59 | no  | up   | 0.16 | no  | 1.07 | no  | up   | 1.2E-03 | yes |
| MSTRG.15096.8 : Caena1c : F1MA84          | 4.75  | yes | up   | 4.3E-04 | yes | chr4  | intron   | internal intron | NA  | 1.18 | no  | up   | 0.19 | no  | 0.97 | no  | down | 2.7E-02 | yes |
| ENSRNOT00000089199 : Tspan9 : D4AAV9      | 0.41  | yes | down | 1.4E-09 | yes | chr4  | exon     | last exon       | NA  | 0.90 | no  | down | 0.58 | no  | 0.96 | no  | down | 2.4E-05 | yes |
| ENSRNOT00000086352 : Col5a1 : A0A0G2JX47  | 0.33  | yes | down | 4.5E-04 | yes | chr3  | intron   | internal intron | NA  | 0.97 | no  | down | 0.76 | no  | 1.01 | no  | up   | 4.0E-01 | no  |
| MSTRG.2768.8 : Usp7 : F1LM09              | inf   | yes | up   | 5.0E-04 | yes | chr10 | intron   | internal intron | NA  | 6.20 | yes | up   | 0.08 | no  | 1.00 | no  | down | 7.8E-01 | no  |
| ENSRNOT00000084563 : Tnc : A0A0G2K1L0     | 0     | yes | down | 7.1E-07 | yes | chr5  | intron   | internal intron | NA  | 2.22 | yes | up   | 0.36 | no  | 1.49 | yes | up   | 1.5E-12 | yes |
| ENSRNOT00000036931 : Dnttp2 : D3ZHM7      | 5.36  | yes | up   | 4.0E-04 | yes | chr2  | promoter | Proximal        | ICP | 1.07 | no  | up   | 0.60 | no  | 1.05 | no  | up   | 1.0E-04 | yes |
| ENSRNOT00000011114 : Croce : D4AD05       | 2.69  | yes | up   | 2.9E-05 | yes | chr5  | intron   | internal intron | NA  | 1.10 | no  | up   | 0.22 | no  | 0.87 | no  | down | 9.6E-04 | yes |
| MSTRG.3849.1 : Pnpo : O88794              | 2.62  | yes | up   | 1.2E-06 | yes | chr10 | intron   | internal intron | NA  | 1.47 | no  | up   | 0.10 | no  | 0.99 | no  | down | 6.7E-01 | no  |
| MSTRG.19777.2 : Sin3a : A0A0G2K3H5        | 0.53  | yes | down | 4.1E-06 | yes | chr8  | intron   | last intron     | NA  | 0.97 | no  | down | 0.40 | no  | 0.96 | no  | down | 6.2E-05 | yes |
| MSTRG.3481.1 : Tsr1 : D3ZEM8              | 45.59 | yes | up   | 3.4E-04 | yes | chr10 | intron   | internal intron | NA  | 0.73 | no  | down | 0.13 | no  | 1.00 | no  | down | 9.7E-01 | no  |
| ENSRNOT00000092431 : Shank3 : A0A0U1RS13  | 3.23  | yes | up   | 4.3E-05 | yes | chr7  | exon     | first exon      | NA  | 1.00 | no  | down | 0.09 | no  | 0.98 | no  | down | 1.0E-02 | yes |
| MSTRG.7803.1 : Mycbp2 : A0A1W2Q6I3        | 0.31  | yes | down | 9.2E-06 | yes | chr15 | intron   | internal intron | NA  | 0.93 | no  | down | 0.50 | no  | 1.00 | no  | up   | 8.8E-01 | no  |
| MSTRG.18268.2 : Akap8 : Q63014            | 0.08  | yes | down | 2.7E-04 | yes | chr7  | intron   | internal intron | NA  | 1.04 | no  | up   | 0.92 | no  | 0.99 | no  | down | 2.8E-01 | no  |
| ENSRNOT00000019772 : Fn1 : F1LST1         | 0.11  | yes | down | 7.7E-11 | yes | chr9  | intron   | internal intron | NA  | 0.52 | no  | down | 0.62 | no  | 1.27 | yes | up   | 4.1E-20 | yes |
| MSTRG.21176.8 : Inpp5d : F1M981           | 0.08  | yes | down | 9.9E-05 | yes | chr9  | intron   | internal intron | NA  | 0.75 | no  | down | 0.22 | no  | 1.08 | no  | up   | 3.1E-05 | yes |
| ENSRNOT00000092157 : Mpp5 : B4F7E7        | 0.37  | yes | down | 1.0E-04 | yes | chr6  | exon     | internal exon   | NA  | 1.02 | no  | up   | 0.93 | no  | 0.99 | no  | down | 5.9E-01 | no  |
| MSTRG.7731.1 : Tsc22d1 : P62501           | 3.00  | yes | up   | 3.0E-04 | yes | chr15 | promoter | Intermediate    | ICP | 2.16 | yes | up   | 0.15 | no  | 0.77 | yes | down | 5.9E-09 | yes |
| MSTRG.16461.1 : Pum1 : D3Z8L5             | 0.44  | yes | down | 3.1E-04 | yes | chr5  | intron   | internal intron | NA  | 1.15 | no  | up   | 0.43 | no  | 1.03 | no  | up   | 7.0E-02 | no  |
| MSTRG.3781.3 : Luc7l3 : D3ZFB2            | 0.31  | yes | down | 4.3E-04 | yes | chr10 | intron   | internal intron | NA  | 1.57 | no  | up   | 0.26 | no  | 0.98 | no  | down | 9.6E-04 | yes |
| ENSRNOT00000044287 : Nr3c1 : P06536       | 0.27  | yes | down | 1.2E-04 | yes | chr18 | exon     | first exon      | NA  | 1.30 | no  | up   | 0.24 | no  | 0.91 | no  | down | 1.6E-10 | yes |
| ENSRNOT00000086572 : Cfh : F1M983         | 0.20  | yes | down | 2.4E-04 | yes | chr13 | intron   | internal intron | NA  | 1.49 | no  | up   | 0.19 | no  | 1.20 | no  | up   | 2.7E-15 | yes |
| ENSRNOT00000083500 : Ces1f : M0R7R1       | 0.26  | yes | down | 2.8E-08 | yes | chr19 | intron   | internal intron | NA  | 1.02 | no  | up   | 0.23 | no  | 0.86 | no  | down | 3.2E-11 | yes |
| MSTRG.8948.2 : Mtpap : D3ZPN5             | 1.99  | yes | up   | 1.4E-05 | yes | chr17 | intron   | internal intron | NA  | 1.40 | no  | up   | 0.07 | no  | 1.03 | no  | up   | 1.2E-01 | no  |
| MSTRG.5399.1 : Eln : A0A0G2JST5           | 3.55  | yes | up   | 3.0E-04 | yes | chr12 | intron   | internal intron | NA  | 0.60 | no  | down | 0.09 | no  | 0.91 | no  | down | 1.2E-01 | no  |
| MSTRG.16327.15 : Macf1 : A0A0G2K9T4       | 0.36  | yes | down | 1.3E-05 | yes | chr5  | exon     | last exon       | NA  | 1.22 | no  | up   | 0.06 | no  | 0.97 | no  | down | 9.0E-11 | yes |
| MSTRG.19220.8 : Kmt2d : A0A0G2JVD6        | 6.53  | yes | up   | 2.1E-09 | yes | chr7  | exon     | last exon       | NA  | 1.05 | no  | up   | 0.94 | no  | 1.03 | no  | up   | 3.5E-02 | yes |
| ENSRNOT00000065402 : Atp6v1h : A0A0G2K9J2 | 0.31  | yes | down | 9.6E-05 | yes | chr5  | intron   | internal intron | NA  | 1.12 | no  | up   | 0.28 | no  | 1.09 | no  | up   | 2.6E-06 | yes |
| MSTRG.21023.8 : Fn1 : F1LST1              | 0.11  | yes | down | 7.7E-11 | yes | chr9  | intron   | internal intron | NA  | 9.19 | yes | up   | 0.42 | no  | 1.27 | yes | up   | 4.1E-20 | yes |
| ENSRNOT00000093546 : Mycbp2 : A0A1W2Q6I3  | 0.31  | yes | down | 9.2E-06 | yes | chr15 | intron   | internal intron | NA  | 1.00 | no  | down | 0.48 | no  | 1.00 | no  | up   | 8.8E-01 | no  |
| ENSRNOT00000089133 : Tbrg4 : Q5M9G9       | 0.25  | yes | down | 2.7E-04 | yes | chr14 | promoter | Distal          | LCP | 0.84 | no  | down | 0.64 | no  | 0.99 | no  | down | 1.9E-01 | no  |
| ENSRNOT00000024707 : Sfxn1 : Q63965       | 0.56  | yes | down | 3.6E-04 | yes | chr17 | intron   | internal intron | NA  | 1.20 | no  | up   | 0.78 | no  | 1.22 | yes | up   | 2.3E-08 | yes |
| ENSRNOT00000004776 : Rufy3 : A0A0G2K6A9   | 2.37  | yes | up   | 3.9E-04 | yes | chr14 | promoter | Distal          | LCP | 0.98 | no  | down | 0.76 | no  | 1.11 | no  | up   | 1.3E-05 | yes |
| MSTRG.18268.9 : Akap8 : Q63014            | 0.08  | yes | down | 2.7E-04 | yes | chr7  | intron   | internal intron | NA  | 1.42 | no  | up   | 0.38 | no  | 0.99 | no  | down | 2.8E-01 | no  |
| MSTRG.18670.4 : Ubr5 : H9KVE3             | 4.26  | yes | up   | 2.2E-04 | yes | chr7  | intron   | first intron    | NA  | 0.70 | no  | down | 0.20 | no  | 0.94 | no  | down | 3.0E-02 | yes |
| ENSRNOT00000080778 : Qrich1 : F1M4M7      | 3.68  | yes | up   | 3.4E-07 | yes | chr8  | exon     | internal exon   | NA  | 1.11 | no  | up   | 0.82 | no  | 1.03 | no  | up   | 2.0E-01 | no  |
| MSTRG.4978.2 : Pi4ka : A0A140TAJ5         | 7.84  | yes | up   | 1.4E-07 | yes | chr11 | intron   | internal intron | NA  | 0.74 | no  | down | 0.64 | no  | 0.97 | no  | down | 1.2E-03 | yes |
| MSTRG.18268.31 : Akap8 : Q63014           | 0.08  | yes | down | 2.7E-04 | yes | chr7  | intron   | internal intron | NA  | 0.61 | no  | down | 0.49 | no  | 0.99 | no  | down | 2.8E-01 | no  |
| ENSRNOT00000029549 : Acap2 : Q5FVC7       | 0.15  | yes | down | 2.4E-05 | yes | chr11 | promoter | Intermediate    | ICP | 1.17 | no  | up   | 0.60 | no  | 0.96 | no  | down | 5.5E-04 | yes |
| MSTRG.9111.4 : Bmi1 : B4F7B6              | 2.46  | yes | up   | 2.3E-04 | yes | chr17 | exon     | last exon       | NA  | 1.02 | no  | up   | 0.08 | no  | 0.98 | no  | down | 3.6E-01 | no  |
| MSTRG.16653.2 : Croce : D4AD05            | 2.69  | yes | up   | 2.9E-05 | yes | chr5  | intron   | internal intron | NA  | 1.05 | no  | up   | 0.81 | no  | 0.87 | no  | down | 9.6E-04 | yes |
| ENSRNOT00000080379 : Ptpa : Q03348        | 0.34  | yes | down | 1.6E-04 | yes | chr3  | exon     | internal exon   | NA  | 0.98 | no  | down | 0.84 | no  | 0.89 | no  | down | 6.4E-12 | yes |
| ENSRNOT00000087143 : Ptdssl : Q5PQL5      | 4.36  | yes | up   | 3.7E-04 | yes | chr7  | exon     | first exon      | NA  | 1.25 | no  | up   | 0.01 | yes | 1.08 | no  | up   | 1.2E-04 | yes |
| MSTRG.7731.2 : Tsc22d1 : P62501           | 3.00  | yes | up   | 3.0E-04 | yes | chr15 | promoter | Intermediate    | ICP | 0.89 | no  | down | 0.76 | no  | 0.77 | yes | down | 5.9E-09 | yes |
| MSTRG.659.4 : Cic : D4A853                | 4.32  | yes | up   | 3.8E-07 | yes | chr1  | exon     | internal exon   | NA  | 0.96 | no  | down | 0.70 | no  | 1.06 | no  | up   | 4.3E-02 | yes |
| MSTRG.16416.1 : Ak2 : A0A0G2JSG6          | inf   | yes | up   | 6.9E-05 | yes | chr5  | exon     | first exon      | NA  | 2.16 | yes | up   | 0.22 | no  | 0.98 | no  | down | 1.2E-04 | yes |
| ENSRNOT00000013581 : Atrh1 : D3ZXL1       | 0.23  | yes | down | 8.6E-06 | yes | chr8  | intron   | first intron    | NA  | 1.23 | no  | up   | 0.12 | no  | 0.93 | no  | down | 1.4E-04 | yes |
| ENSRNOT00000076676 : Parp4 : A0A096MJR6   | 1.23  | yes | up   | 1.1E-06 | yes | chr15 | intron   | last intron     | NA  | 1.05 | no  | up   | 0.37 | no  | 0.95 | no  | down | 6.6E-05 | yes |
| ENSRNOT00000086396 : Slc8a2 : A0A0G2JZK7  | 5.43  | yes | up   | 2.7E-05 | yes | chr1  | exon     | last exon       | NA  | 1.45 | no  | up   | 0.26 | no  | 0.78 | yes | down | 9.3E-16 | yes |
| MSTRG.7223.1 : Zswim8 : A0A0G2K9R0        | 0.41  | yes | down | 1.3E-06 | yes | chr15 | intron   | last intron     | NA  | 0.95 | no  | down | 0.53 | no  | 0.92 | no  | down | 1.2E-05 | yes |
| MSTRG.21202.7 : Lrrflp1 : Q66HF9          | 6.49  | yes | up   | 4.9E-10 | yes | chr9  | exon     | last exon       | NA  | 0.83 | no  | down | 0.05 | yes | 1.15 | no  | up   | 2.1E-11 | yes |
| MSTRG.8552.3 : Ddx46 : Q62780             | 0.56  | yes | down | 3.4E-04 | yes | chr17 | intron   | internal intron | NA  | 0.96 | no  | down | 0.81 | no  | 0.98 | no  | down | 1.3E-01 | no  |
| ENSRNOT00000031871 : Nt5dc3 : D3ZAI6      | 1.55  | yes | up   | 4.2E-07 | yes | chr7  | intron   | internal intron | NA  | 0.76 | no  | down | 0.50 | no  | 1.05 | no  | up   | 2.5E-05 | yes |
| MSTRG.1463.2 : Stim1 : P84903             | 2.61  | yes | up   | 1.3E-04 | yes | chr1  | exon     | last exon       | NA  | 1.14 | no  | up   | 0.12 | no  | 0.92 | no  | down | 3.4E-08 | yes |
| MSTRG.21604.5 : Tbl1x : B2RZA6            | 0     | yes | down | 6.0E-05 | yes | chrX  | intron   | internal intron | NA  | 1.11 | no  | up   | 0.47 | no  | 1.12 | no  | up   | 7.8E-09 | yes |
| MSTRG.18557.12 : Mon2 : D3ZCG3            | 0.07  | yes | down | 1.5E-08 | yes | chr7  | intron   | internal intron | NA  | 1.00 | no  | down | 0.45 | no  | 1.05 | no  | up   | 7.1E-07 | yes |
| MSTRG.21083.18 : Speg : Q63638            | 0.17  | yes | down | 2.6E-06 | yes | chr9  | intron   | internal intron | NA  | 1.38 | no  | up   | 0.27 | no  | 0.88 | no  | down | 2.3E-07 | yes |
| MSTRG.11091.4 : Gucyl3a : P19686          | 0.26  | yes | down | 3.9E-06 | yes | chr2  | intron   | internal intron | NA  | 0.43 | yes | down | 0.47 | no  | 0.85 | no  | down | 1.4E-12 | yes |
| MSTRG.21039.2 : Tns1 : F1LN42             | 0.09  | yes | down | 2.0E-04 | yes | chr9  | intron   | last intron     | NA  | 1.02 | no  | up   | 0.97 | no  | 0.86 | no  | down | 7.8E-19 | yes |
| MSTRG.13383.1 : Vps39 : E9PT04            | inf   | yes | up   | 4.3E-04 | yes | chr3  | intron   | internal intron | NA  | 2.28 | yes | up   | 0.02 | yes | 1.08 | no  | up   | 2.7E-04 | yes |
| MSTRG.17200.1 : Adam17 : G3V711           | 0.27  | yes | down | 3.8E-13 | yes | chr6  | intron   | internal intron | NA  | 0.89 | no  | down | 0.90 | no  | 1.00 | no  | down | 9.2E-01 | no  |
| MSTRG.19329.1 : Atf7 : B0BMY0             | 0.38  | yes | down | 7.2E-06 | yes | chr7  | intron   | internal intron | NA  | 1.38 | no  | up   | 0.49 | no  | 1.00 | no  | down | 9.7E-01 | no  |
| ENSRNOT00000020630 : Gle1 : Q4KLN4        | 0.16  | yes | down | 1.6E-04 | yes | chr3  | promoter | Proximal        | LCP | 1.20 | no  | up   | 0.06 | no  | 0.95 | no  | down | 1.3E-02 | yes |
| MSTRG.3249.3 : Specc1 : A0A0G2K5D7        | 5.53  | yes | up   | 1.9E-10 | yes | chr10 | exon     | last exon       | NA  | 1.27 | no  | up   | 0.61 | no  | 0.93 | no  | down | 4.4E-09 | yes |
| MSTRG.14995.4 : Itpr1 : A0A0A0MY31        | 3.16  | yes | up   | 1.1E-05 | yes | chr4  | intron   | internal intron | NA  | 0.89 | no  | down | 0.88 | no  | 0.87 | no  | down | 1.1E-14 | yes |
| MSTRG.7951.1 : Mapk8 : A0A0G2KA63         | 0.22  | yes | down | 1.8E-04 | yes | chr16 | intron   | internal intron | NA  | 0.95 | no  | down | 0.78 | no  | 1.06 | no  | up   | 2.4E-05 | yes |
| ENSRNOT00000092982 : Gtf2i : Q5U2Y1       | 5.31  | yes | up   | 4.9E-06 | yes | chr12 | promoter | Distal          | LCP | 0.95 | no  |      |      |     |      |     |      |         |     |

|                                          |       |     |      |         |     |       |          |                 |     |      |     |      |      |     |      |     |      |         |     |
|------------------------------------------|-------|-----|------|---------|-----|-------|----------|-----------------|-----|------|-----|------|------|-----|------|-----|------|---------|-----|
| MSTRG.2010.1 : Ppp6r3 : D3ZBT9           | 3.21  | yes | up   | 8.1E-07 | yes | chr1  | intron   | internal intron | NA  | 1.13 | no  | up   | 0.44 | no  | 0.98 | no  | down | 7.0E-03 | yes |
| MSTRG.549.2 : Ze3h4 : D3ZVW3             | 2.19  | yes | up   | 2.6E-04 | yes | chr1  | intron   | internal intron | NA  | 1.21 | no  | up   | 0.79 | no  | 0.98 | no  | down | 3.2E-01 | no  |
| ENSRNOT00000020543 : Tnpo1 : F1LQP9      | 24.87 | yes | up   | 1.6E-05 | yes | chr2  | exon     | internal exon   | NA  | 0.89 | no  | down | 0.91 | no  | 0.98 | no  | down | 5.8E-02 | no  |
| ENSRNOT00000074718 : Gas7 : M0R4R4       | 4.60  | yes | up   | 4.0E-11 | yes | chr10 | intron   | first intron    | NA  | 0.90 | no  | down | 0.71 | no  | 1.22 | yes | up   | 2.5E-15 | yes |
| MSTRG.19173.3 : Ano6 : A0A0G2K1M7        | 3.87  | yes | up   | 9.8E-09 | yes | chr7  | intron   | internal intron | NA  | 0.71 | no  | down | 0.39 | no  | 0.91 | no  | down | 2.1E-09 | yes |
| ENSRNOT00000019309 : Arhgap17 : D4AAV2   | 0.83  | yes | down | 2.6E-07 | yes | chr1  | intron   | internal intron | NA  | 1.08 | no  | up   | 0.78 | no  | 1.01 | no  | up   | 3.1E-01 | no  |
| MSTRG.13466.1 : Myef2 : A0A0G2K402       | 2.63  | yes | up   | 2.7E-04 | yes | chr3  | promoter | Intermediate    | LCP | 2.59 | yes | up   | 0.17 | no  | 0.93 | no  | down | 4.5E-09 | yes |
| MSTRG.20831.1 : Tgfbra1 : D3ZXT8         | 0.12  | yes | down | 2.5E-04 | yes | chr9  | intron   | internal intron | NA  | 0.50 | yes | down | 0.37 | no  | 0.98 | no  | down | 2.9E-01 | no  |
| ENSRNOT00000026373 : Gnao1 : P59215      | 0.45  | yes | down | 1.5E-04 | yes | chr19 | exon     | internal exon   | NA  | 0.81 | no  | down | 0.10 | no  | 0.81 | yes | down | 3.6E-12 | yes |
| ENSRNOT00000084020 : Med12l : A0A0G2JV69 | 6.48  | yes | up   | 1.3E-08 | yes | chr2  | promoter | Distal          | LCP | 0.95 | no  | down | 0.02 | yes | 0.61 | yes | down | 2.2E-04 | yes |
| MSTRG.4937.1 : Gp1bb : Q9JJM7            | 0     | yes | down | 2.2E-04 | yes | chr11 | intron   | internal intron | NA  | 0.62 | no  | down | 0.21 | no  | 0.93 | no  | down | 7.7E-08 | yes |
| MSTRG.599.1 : Bloc1s3 : D4A3V6           | 3.64  | yes | up   | 1.9E-05 | yes | chr1  | exon     | first exon      | NA  | 1.41 | no  | up   | 0.40 | no  | 0.73 | yes | down | 2.9E-09 | yes |
| ENSRNOT00000020044 : Nr2f1 : A0A1W2Q6N8  | 1.84  | yes | up   | 2.6E-07 | yes | chr2  | intron   | last intron     | NA  | 1.14 | no  | up   | 0.41 | no  | 1.00 | no  | up   | 7.8E-01 | no  |
| MSTRG.19119.2 : Gramd4 : F1LYJ8          | 0.57  | yes | down | 9.4E-05 | yes | chr7  | intron   | internal intron | NA  | 2.49 | yes | up   | 0.09 | no  | 1.32 | yes | up   | 2.0E-09 | yes |
| MSTRG.13405.3 : Tmem62 : D3ZIW4          | 0.44  | yes | down | 9.9E-05 | yes | chr3  | exon     | last exon       | NA  | 1.45 | no  | up   | 0.44 | no  | 1.03 | no  | up   | 1.0E-01 | no  |
| ENSRNOT00000090026 : Glc : A0A0G2KAN7    | 0.05  | yes | down | 1.5E-13 | yes | chr9  | intron   | first intron    | NA  | 0.99 | no  | down | 0.99 | no  | 1.09 | no  | up   | 8.3E-03 | yes |
| MSTRG.18268.30 : Akap8 : Q63014          | 0.08  | yes | down | 2.7E-04 | yes | chr7  | intron   | internal intron | NA  | 0.68 | no  | down | 0.44 | no  | 0.99 | no  | down | 2.8E-01 | no  |
| MSTRG.6191.3 : Ddr2 : B1WC09             | 0.49  | yes | down | 3.3E-05 | yes | chr13 | exon     | internal exon   | NA  | 1.88 | no  | up   | 0.48 | no  | 0.95 | no  | down | 3.2E-01 | no  |
| ENSRNOT00000080676 : Ywhaz : P63102      | 3.68  | yes | up   | 2.7E-04 | yes | chr7  | intron   | last intron     | NA  | 1.18 | no  | up   | 0.47 | no  | 0.87 | no  | down | 1.2E-13 | yes |
| ENSRNOT00000091270 : Tnrc6b : A0A0G2K6R0 | 2.14  | yes | up   | 4.3E-13 | yes | chr7  | exon     | last exon       | NA  | 1.34 | no  | up   | 0.02 | yes | 1.01 | no  | up   | 7.4E-01 | no  |
| ENSRNOT00000077612 : Gsk3b : A0A0G2JSH4  | 2.36  | yes | up   | 1.7E-04 | yes | chr11 | intron   | internal intron | NA  | 1.01 | no  | up   | 0.85 | no  | 0.98 | no  | down | 1.1E-02 | yes |
| MSTRG.10517.1 : Erbin : M0R9T2           | 3.86  | yes | up   | 2.1E-05 | yes | chr2  | intron   | last intron     | NA  | 0.78 | no  | down | 0.52 | no  | 0.94 | no  | down | 3.9E-05 | yes |
| ENSRNOT00000076859 : Fyn : Q62844        | 0.38  | yes | down | 2.4E-05 | yes | chr20 | exon     | last exon       | NA  | 1.25 | no  | up   | 0.09 | no  | 1.01 | no  | up   | 5.2E-01 | no  |
| ENSRNOT00000019057 : Lhfp : Q5BJS2       | 2.11  | yes | up   | 5.8E-06 | yes | chr2  | intron   | internal intron | NA  | 1.04 | no  | up   | 0.70 | no  | 0.95 | no  | down | 4.1E-02 | yes |
| ENSRNOT00000024196 : Gpld1 : G3V8B1      | 6.56  | yes | up   | 2.9E-12 | yes | chr17 | intron   | internal intron | NA  | 0.88 | no  | down | 0.34 | no  | 1.02 | no  | up   | 3.6E-01 | no  |
| MSTRG.8713.3 : Sirt5 : Q68FX9            | 6.16  | yes | up   | 1.6E-04 | yes | chr17 | intron   | internal intron | NA  | 0.93 | no  | down | 0.61 | no  | 1.01 | no  | up   | 5.1E-01 | no  |
| MSTRG.8278.29 : Rbpms : F2Z3S5           | 0.02  | yes | down | 2.6E-05 | yes | chr16 | promoter | Proximal        | ICP | 1.01 | no  | up   | 0.09 | no  | 1.06 | no  | up   | 4.9E-05 | yes |
| MSTRG.19496.1 : Cnn1 : Q08290            | 3.38  | yes | up   | 1.8E-04 | yes | chr8  | intron   | internal intron | NA  | 0.89 | no  | down | 0.52 | no  | 1.04 | no  | up   | 1.3E-06 | yes |
| MSTRG.17688.1 : Golga5 : G3V6Z7          | 4.67  | yes | up   | 4.2E-17 | yes | chr6  | intron   | last intron     | NA  | 0.89 | no  | down | 0.45 | no  | 1.07 | no  | up   | 2.3E-12 | yes |
| MSTRG.14349.2 : Cped1 : A0A0G2QC10       | 1.61  | yes | up   | 4.5E-04 | yes | chr4  | intron   | internal intron | NA  | 1.88 | no  | up   | 0.42 | no  | 1.07 | no  | up   | 1.5E-03 | yes |
| ENSRNOT00000077334 : Med12l : A0A0G2JV69 | 6.48  | yes | up   | 1.3E-08 | yes | chr2  | promoter | Distal          | LCP | 0.99 | no  | down | 0.45 | no  | 0.61 | yes | down | 2.2E-04 | yes |
| MSTRG.19472.6 : Dnm2 : A0A0A0MY48        | 0.11  | yes | down | 8.9E-11 | yes | chr8  | intron   | first intron    | NA  | 1.07 | no  | up   | 0.21 | no  | 1.05 | no  | up   | 2.0E-08 | yes |
| MSTRG.15479.4 : Prex2 : A0A0G2KA11       | 5.57  | yes | up   | 1.6E-04 | yes | chr5  | intron   | internal intron | NA  | 1.59 | no  | up   | 0.48 | no  | 1.02 | no  | up   | 2.3E-01 | no  |
| MSTRG.11953.28 : RT1-CE7 : D3ZLE6        | inf   | yes | up   | 7.3E-07 | yes | chr20 | exon     | internal exon   | NA  | 0.99 | no  | down | 0.97 | no  | 1.22 | yes | up   | 7.3E-16 | yes |
| MSTRG.11265.8 : Ubap2l : E9PTR4          | 6.62  | yes | up   | 4.0E-04 | yes | chr2  | intron   | internal intron | NA  | 0.82 | no  | down | 0.44 | no  | 1.13 | no  | up   | 3.8E-12 | yes |
| ENSRNOT00000058887 : Dock5 : F1LVA9      | 0.40  | yes | down | 5.4E-05 | yes | chr15 | intron   | internal intron | NA  | 1.26 | no  | up   | 0.11 | no  | 1.14 | no  | up   | 7.1E-05 | yes |
| ENSRNOT00000084535 : Cpd : A0A0G2JY30    | 0.15  | yes | down | 4.3E-04 | yes | chr10 | intron   | internal intron | NA  | 1.00 | no  | down | 0.42 | no  | 1.13 | no  | up   | 1.1E-08 | yes |
| ENSRNOT00000067318 : Arhgap1 : D4A6C5    | 3.73  | yes | up   | 1.8E-11 | yes | chr3  | intron   | internal intron | NA  | 0.42 | yes | down | 0.35 | no  | 1.04 | no  | up   | 1.7E-04 | yes |
| MSTRG.17738.3 : Vrk1 : Q6AYA2            | 0.22  | yes | down | 2.5E-07 | yes | chr6  | intron   | internal intron | NA  | 1.10 | no  | up   | 0.82 | no  | 1.01 | no  | up   | 2.7E-01 | no  |
| ENSRNOT00000080888 : Kif1b : A0A0G2KA12  | 3.65  | yes | up   | 7.4E-05 | yes | chr5  | intron   | internal intron | NA  | 0.80 | no  | down | 0.45 | no  | 1.05 | no  | up   | 6.5E-02 | no  |
| MSTRG.3353.1 : Zbtb4 : D4A8X0            | inf   | yes | up   | 2.4E-05 | yes | chr10 | intron   | last intron     | NA  | 1.61 | no  | up   | 0.40 | no  | 0.97 | no  | down | 6.9E-02 | no  |
| ENSRNOT00000022359 : Lpcat2 : F1LN03     | 0.55  | yes | down | 2.2E-04 | yes | chr19 | exon     | internal exon   | NA  | 1.29 | no  | up   | 0.05 | yes | 1.16 | no  | up   | 3.1E-07 | yes |
| MSTRG.540.4 : Slc8a2 : A0A0G2JZK7        | 5.43  | yes | up   | 2.7E-05 | yes | chr1  | exon     | last exon       | NA  | 1.12 | no  | up   | 0.64 | no  | 0.78 | yes | down | 9.3E-16 | yes |
| MSTRG.22091.1 : Arhgef6 : Q5XXR3         | 0.21  | yes | down | 2.1E-04 | yes | chrX  | intron   | internal intron | NA  | 0.98 | no  | down | 0.96 | no  | 0.93 | no  | down | 2.3E-08 | yes |
| MSTRG.2579.1 : Sfxn3 : Q6P6T0            | 0.39  | yes | down | 7.8E-05 | yes | chr1  | intron   | internal intron | NA  | 2.21 | yes | up   | 0.05 | yes | 1.12 | no  | up   | 6.4E-07 | yes |
| ENSRNOT00000091318 : Kcnma1 : A0A0G2K104 | 4.06  | yes | up   | 2.6E-13 | yes | chr15 | intron   | internal intron | NA  | 1.01 | no  | up   | 0.66 | no  | 0.89 | no  | down | 7.4E-06 | yes |
| MSTRG.1783.6 : Tgfb1i1 : Q99PD6          | 3.08  | yes | up   | 7.2E-05 | yes | chr1  | intron   | internal intron | NA  | 0.80 | no  | down | 0.63 | no  | 1.06 | no  | up   | 1.6E-04 | yes |
| ENSRNOT00000001198 : Kctd7 : B1WC97      | 1.68  | yes | up   | 8.9E-05 | yes | chr12 | intron   | internal intron | NA  | 0.89 | no  | down | 0.43 | no  | 1.10 | no  | up   | 2.1E-04 | yes |
| MSTRG.6685.3 : Exoc1 : A0A0G2K2V5        | inf   | yes | up   | 6.1E-05 | yes | chr14 | intron   | first intron    | NA  | 0.68 | no  | down | 0.42 | no  | 0.90 | no  | down | 2.2E-04 | yes |
| MSTRG.8552.5 : Ddx46 : Q62780            | 0.56  | yes | down | 3.4E-04 | yes | chr17 | intron   | internal intron | NA  | 0.77 | no  | down | 0.10 | no  | 0.98 | no  | down | 1.3E-01 | no  |
| MSTRG.21008.3 : Myl1 : P02600            | 2.29  | yes | up   | 4.3E-05 | yes | chr9  | promoter | Distal          | LCP | 0.80 | no  | down | 0.38 | no  | 1.33 | yes | up   | 6.1E-13 | yes |
| ENSRNOT00000079917 : Prex2 : A0A0G2KA11  | 5.57  | yes | up   | 1.6E-04 | yes | chr5  | intron   | internal intron | NA  | 1.00 | no  | down | 0.98 | no  | 1.02 | no  | up   | 2.3E-01 | no  |
| ENSRNOT00000037517 : C1qbp : O35796      | 19.02 | yes | up   | 1.7E-11 | yes | chr10 | intron   | internal intron | NA  | 0.94 | no  | down | 0.65 | no  | 0.95 | no  | down | 2.1E-05 | yes |
| MSTRG.21122.1 : Agfg1 : F1M9N7           | 3.59  | yes | up   | 1.8E-08 | yes | chr9  | exon     | internal exon   | NA  | 1.74 | no  | up   | 0.47 | no  | 1.16 | no  | up   | 6.0E-06 | yes |
| ENSRNOT00000001347 : Tecpr1 : Q3ZBA0     | 0.43  | yes | down | 3.1E-04 | yes | chr12 | promoter | Intermediate    | LCP | 1.06 | no  | up   | 0.48 | no  | 1.17 | no  | up   | 7.7E-08 | yes |
| ENSRNOT00000008698 : Thns12 : Q5M7T9     | 3.56  | yes | up   | 3.5E-12 | yes | chr4  | intron   | internal intron | NA  | 1.02 | no  | up   | 0.84 | no  | 0.97 | no  | down | 4.8E-01 | no  |
| ENSRNOT00000021475 : Dep1a : D4AE80      | inf   | yes | up   | 1.3E-05 | yes | chr16 | exon     | last exon       | NA  | 0.95 | no  | down | 0.44 | no  | 0.95 | no  | down | 3.8E-02 | yes |
| MSTRG.18264.2 : Notch3 : F1LQX7          | 0.61  | yes | down | 2.1E-04 | yes | chr7  | exon     | internal exon   | NA  | 1.06 | no  | up   | 0.89 | no  | 0.96 | no  | down | 9.5E-04 | yes |
| ENSRNOT00000001743 : S100b : P04631      | 0.27  | yes | down | 2.6E-04 | yes | chr20 | exon     | last exon       | NA  | 0.83 | no  | down | 0.71 | no  | 0.76 | yes | down | 2.0E-16 | yes |
| ENSRNOT00000057798 : Specc1 : A0A0G2K5D7 | 5.53  | yes | up   | 1.9E-10 | yes | chr10 | exon     | last exon       | NA  | 0.58 | no  | down | 0.16 | no  | 0.93 | no  | down | 4.4E-09 | yes |
| MSTRG.19777.9 : Sin3a : A0A0G2K3H5       | 0.53  | yes | down | 4.1E-06 | yes | chr8  | intron   | last intron     | NA  | 2.72 | yes | up   | 0.07 | no  | 0.96 | no  | down | 6.2E-05 | yes |
| MSTRG.6713.6 : Fryl : D3ZQY4             | 2.76  | yes | up   | 1.7E-04 | yes | chr14 | intron   | internal intron | NA  | 2.21 | yes | up   | 0.09 | no  | 1.00 | no  | down | 4.6E-01 | no  |
| MSTRG.18880.3 : Plec : F7F9U6            | 0.33  | yes | down | 4.2E-06 | yes | chr7  | exon     | last exon       | NA  | 1.02 | no  | up   | 0.96 | no  | 0.90 | no  | down | 2.5E-03 | yes |
| ENSRNOT000000079138 : Lama2 : F1M614     | 0.44  | yes | down | 4.4E-04 | yes | chr1  | intron   | internal intron | NA  | 1.03 | no  | up   | 0.73 | no  | 1.06 | no  | up   | 1.3E-07 | yes |
| MSTRG.21168.3 : Gigyf2 : A0A096MJ14      | 0.59  | yes | down | 1.9E-05 | yes | chr9  | intron   | internal intron | NA  | 1.54 | no  | up   | 0.06 | no  | 1.31 | yes | up   | 2.3E-10 | yes |
| MSTRG.20963.4 : Nbeal1 : F1M6V0          | 4.79  | yes | up   | 6.8E-08 | yes | chr9  | intron   | internal intron | NA  | 1.32 | no  | up   | 0.75 | no  | 1.00 | no  | up   | 5.1E-01 | no  |
| MSTRG.98.1 : Bclaf1 : B1WC16             | 0.67  | yes | down | 1.3E-07 | yes | chr1  | intron   | internal intron | NA  | 0.78 | no  | down | 0.75 | no  | 1.03 | no  | up   | 6.8E-02 | no  |
| ENSRNOT00000064263 : Limch1 : F1M392     | 1.09  | no  | up   | 3.3E-04 | yes | chr14 | intron   | last intron     | NA  | 0.99 | no  | down | 0.99 | no  | 0.85 | no  | down | 1.1E-13 | yes |
| ENSRNOT00000001605 : Pwp2 : D3ZV54       | 0.63  | yes | down | 1.1E-04 | yes | chr20 | promoter | Intermediate    | ICP | 0.99 | no  | down | 0.87 | no  | 1.05 | no  | up   | 1.3E-02 | yes |
| MSTRG.3353.2 : Zbtb4 : D4A8X0            | inf   | yes | up   | 2.4E-05 | yes | chr10 | intron   | last intron     | NA  | 1.28 | no  | up   | 0.61 | no  | 0.97 | no  | down | 6.9E-02 | no  |
| ENSRNOT00000084496 : Inpp5k : A0A0G2K2Z2 | 8.85  | yes | up   | 4.8E-08 |     |       |          |                 |     |      |     |      |      |     |      |     |      |         |     |

|                                             |       |     |      |         |     |       |          |                 |     |      |     |      |      |     |      |     |      |         |     |
|---------------------------------------------|-------|-----|------|---------|-----|-------|----------|-----------------|-----|------|-----|------|------|-----|------|-----|------|---------|-----|
| MSTRG.22064.5 : Arhgap4 : A0A0G2JVF0        | 0.34  | yes | down | 1.4E-05 | yes | chrX  | intron   | internal intron | NA  | 1.17 | no  | up   | 0.47 | no  | 1.07 | no  | up   | 7.1E-04 | yes |
| ENSRNOT00000064774 : Prex2 : A0A0G2KA11     | 5.57  | yes | up   | 1.6E-04 | yes | chr5  | intron   | internal intron | NA  | 1.01 | no  | up   | 0.52 | no  | 1.02 | no  | up   | 2.3E-01 | no  |
| MSTRG.12280.2 : Herc4 : Q5PQN1              | 2.70  | yes | up   | 6.2E-07 | yes | chr20 | intron   | internal intron | NA  | 1.05 | no  | up   | 0.79 | no  | 1.00 | no  | down | 9.1E-01 | no  |
| MSTRG.3296.2 : Gas7 : M0R4R4                | 4.60  | yes | up   | 4.0E-11 | yes | chr10 | intron   | first intron    | NA  | 0.72 | no  | down | 0.56 | no  | 1.22 | yes | up   | 2.5E-15 | yes |
| ENSRNOT00000078255 : ST7 : A0A0G2KBB5       | 4.88  | yes | up   | 1.5E-16 | yes | chr4  | promoter | Distal          | LCP | 0.98 | no  | down | 0.40 | no  | 1.14 | no  | up   | 1.4E-03 | yes |
| MSTRG.21446.1 : Tfe3 : D3ZAW6               | 0.07  | yes | down | 2.9E-11 | yes | chrX  | exon     | last exon       | NA  | 0.54 | no  | down | 0.07 | no  | 1.04 | no  | up   | 1.6E-03 | yes |
| MSTRG.9198.1 : Osbpl1a : A0A0G2K327         | 0.28  | yes | down | 2.2E-05 | yes | chr18 | intron   | internal intron | NA  | 1.15 | no  | up   | 0.34 | no  | 0.94 | no  | down | 2.8E-02 | yes |
| ENSRNOT00000080185 : Fdps : F1LND7          | inf   | yes | up   | 2.2E-05 | yes | chr2  | exon     | last exon       | NA  | 1.43 | no  | up   | 0.43 | no  | 1.07 | no  | up   | 1.2E-03 | yes |
| ENSRNOT00000001158 : Arhgef6 : Q5XXR3       | 0.21  | yes | down | 2.1E-04 | yes | chrX  | intron   | internal intron | NA  | 1.59 | no  | up   | 0.31 | no  | 0.93 | no  | down | 2.3E-08 | yes |
| ENSRNOT00000085727 : Myo1e : A0A0G2K9E8     | 3.15  | yes | up   | 9.4E-05 | yes | chr8  | intron   | first intron    | NA  | 1.00 | no  | down | 0.48 | no  | 0.76 | yes | down | 2.6E-20 | yes |
| ENSRNOT00000092552 : Lamp1 : P14562         | 0.27  | yes | down | 5.9E-08 | yes | chr16 | promoter | Distal          | LCP | 1.00 | no  | down | 0.09 | no  | 1.10 | no  | up   | 5.4E-06 | yes |
| ENSRNOT00000042082 : Ube2f : Q5U203         | 7.18  | yes | up   | 7.2E-05 | yes | chr9  | intron   | internal intron | NA  | 1.09 | no  | up   | 0.65 | no  | 1.01 | no  | up   | 5.6E-01 | no  |
| ENSRNOT00000005144 : Slc25a11 : G3V6H5      | 0.46  | yes | down | 2.3E-04 | yes | chr10 | intron   | internal intron | NA  | 0.99 | no  | down | 0.94 | no  | 0.93 | no  | down | 1.9E-12 | yes |
| ENSRNOT00000091389 : Fmo2 : G3V6F6          | 2.66  | yes | up   | 2.1E-11 | yes | chr13 | intron   | internal intron | NA  | 0.85 | no  | down | 0.67 | no  | 1.21 | yes | up   | 2.2E-15 | yes |
| MSTRG.12770.2 : Hspa5 : P06761              | 0.56  | yes | down | 2.4E-04 | yes | chr3  | intron   | internal intron | NA  | 0.62 | no  | down | 0.55 | no  | 1.06 | no  | up   | 6.4E-09 | yes |
| ENSRNOT00000077048 : Becn1 : Q91XJ1         | 0.15  | yes | down | 1.2E-04 | yes | chr10 | exon     | first exon      | NA  | 1.45 | no  | up   | 0.02 | yes | 0.97 | no  | down | 9.2E-02 | no  |
| ENSRNOT00000085191 : Shank3 : A0A0U1RS13    | 3.23  | yes | up   | 4.3E-05 | yes | chr7  | exon     | first exon      | NA  | 1.00 | no  | down | 0.09 | no  | 0.98 | no  | down | 1.0E-02 | yes |
| MSTRG.9900.2 : Rnaseh2a : Q5U209            | 14.16 | yes | up   | 1.1E-05 | yes | chr19 | intron   | last intron     | NA  | 0.86 | no  | down | 0.21 | no  | 1.08 | no  | up   | 2.6E-05 | yes |
| ENSRNOT00000001215 : Gusb : F1LQQ8          | 29.04 | yes | up   | 6.5E-05 | yes | chr12 | intron   | internal intron | NA  | 0.99 | no  | down | 0.96 | no  | 0.97 | no  | down | 1.8E-03 | yes |
| MSTRG.1265.1 : Zfp592 : D3ZJG8              | 0.22  | yes | down | 8.1E-08 | yes | chr1  | exon     | internal exon   | NA  | 1.08 | no  | up   | 0.36 | no  | 1.06 | no  | up   | 1.8E-05 | yes |
| ENSRNOT00000021689 : Fam129b : B4F7E8       | 25.76 | yes | up   | 9.8E-05 | yes | chr3  | intron   | internal intron | NA  | 0.97 | no  | down | 0.93 | no  | 0.90 | no  | down | 7.0E-10 | yes |
| MSTRG.17586.5 : Ylpm1 : A0A0G2K678          | 0.14  | yes | down | 2.3E-07 | yes | chr6  | intron   | internal intron | NA  | 1.76 | no  | up   | 0.26 | no  | 1.02 | no  | up   | 1.8E-03 | yes |
| MSTRG.15065.1 : Plxnd1 : D4AA77             | 0.14  | yes | down | 1.5E-08 | yes | chr4  | intron   | internal intron | NA  | 0.88 | no  | down | 0.43 | no  | 0.94 | no  | down | 1.4E-01 | no  |
| MSTRG.9803.1 : Rbl2 : G3V7P7                | 0.41  | yes | down | 2.1E-05 | yes | chr19 | intron   | internal intron | NA  | 0.83 | no  | down | 0.53 | no  | 0.89 | no  | down | 1.5E-05 | yes |
| MSTRG.16821.1 : Prdm16 : M0RDL0             | 0.37  | yes | down | 2.7E-04 | yes | chr5  | exon     | internal exon   | NA  | 0.97 | no  | down | 0.92 | no  | 0.83 | yes | down | 1.1E-06 | yes |
| ENSRNOT00000018167 : Pex14 : Q642G4         | 2.11  | yes | up   | 2.4E-04 | yes | chr5  | intron   | internal intron | NA  | 0.86 | no  | down | 0.16 | no  | 1.04 | no  | up   | 2.1E-03 | yes |
| ENSRNOT00000093260 : Mycbp2 : A0A1W2Q6I3    | 0.31  | yes | down | 9.2E-06 | yes | chr15 | intron   | internal intron | NA  | 0.97 | no  | down | 0.34 | no  | 1.00 | no  | up   | 8.8E-01 | no  |
| ENSRNOT00000016613 : Casp8 : Q9JHX4         | 11.45 | yes | up   | 1.6E-14 | yes | chr9  | intron   | first intron    | NA  | 1.42 | no  | up   | 0.28 | no  | 1.03 | no  | up   | 4.4E-02 | yes |
| ENSRNOT00000018788 : Khlh13 : F1LM44        | 0.22  | yes | down | 7.1E-07 | yes | chrX  | intron   | last intron     | NA  | 1.12 | no  | up   | 0.73 | no  | 1.03 | no  | up   | 6.8E-03 | yes |
| MSTRG.8514.8 : Zcchc6 : D3ZKR9              | 0.14  | yes | down | 1.2E-08 | yes | chr17 | exon     | internal exon   | NA  | 1.59 | no  | up   | 0.11 | no  | 1.12 | no  | up   | 2.3E-06 | yes |
| ENSRNOT00000024493 : Tpm1 : A0A0G2JSQ4      | 9.41  | yes | up   | 5.1E-14 | yes | chr8  | intron   | internal intron | NA  | 0.72 | no  | down | 0.44 | no  | 0.81 | yes | down | 2.5E-10 | yes |
| MSTRG.5723.4 : Ttc28 : D3ZXP1               | 4.41  | yes | up   | 1.9E-04 | yes | chr12 | promoter | Intermediate    | LCP | 1.19 | no  | up   | 0.52 | no  | 0.86 | no  | down | 6.9E-05 | yes |
| ENSRNOT00000018843 : Arhgap26 : A0A0G2K5D5  | 0.31  | yes | down | 2.9E-05 | yes | chr18 | intron   | internal intron | NA  | 1.03 | no  | up   | 0.48 | no  | 1.14 | no  | up   | 8.4E-08 | yes |
| MSTRG.6746.2 : Pds5a : A4L9P7               | 1.26  | yes | up   | 1.3E-13 | yes | chr14 | exon     | last exon       | NA  | 1.11 | no  | up   | 0.47 | no  | 1.01 | no  | up   | 2.7E-01 | no  |
| ENSRNOT00000036373 : Dgka : P51556          | 0.72  | yes | down | 1.5E-04 | yes | chr7  | exon     | internal exon   | NA  | 1.21 | no  | up   | 0.40 | no  | 0.95 | no  | down | 8.8E-04 | yes |
| MSTRG.2160.2 : Rasgrp2 : P0C643             | 0.26  | yes | down | 2.6E-04 | yes | chr1  | exon     | internal exon   | NA  | 1.00 | no  | down | 1.00 | no  | 1.04 | no  | up   | 7.0E-02 | no  |
| MSTRG.20817.3 : Map4k4 : A0A0G2K7W4         | 0.36  | yes | down | 7.1E-05 | yes | chr9  | intron   | internal intron | NA  | 1.12 | no  | up   | 0.33 | no  | 1.10 | no  | up   | 7.1E-06 | yes |
| MSTRG.4525.7 : Mx1 : Q499S4                 | 3.65  | yes | up   | 1.1E-13 | yes | chr11 | intron   | internal intron | NA  | 0.28 | yes | down | 0.41 | no  | 1.36 | yes | up   | 1.2E-13 | yes |
| ENSRNOT00000004829 : Arhgap44 : A0A0H2UHC0  | 7.94  | yes | up   | 4.2E-19 | yes | chr10 | intron   | internal intron | NA  | 0.91 | no  | down | 0.01 | yes | 1.04 | no  | up   | 6.6E-02 | no  |
| MSTRG.3225.1 : Shmt1 : Q6TXG7               | 0.30  | yes | down | 2.1E-05 | yes | chr10 | intron   | internal intron | NA  | 1.11 | no  | up   | 0.66 | no  | 0.90 | no  | down | 1.3E-08 | yes |
| ENSRNOT00000093205 : Timm50 : D3ZJX5        | 0.54  | yes | down | 3.3E-07 | yes | chr1  | exon     | last exon       | NA  | 1.06 | no  | up   | 0.48 | no  | 0.98 | no  | down | 4.2E-02 | yes |
| MSTRG.97.11 : Bclaf1 : B1WC16               | 0.67  | yes | down | 1.3E-07 | yes | chr1  | intron   | internal intron | NA  | 1.05 | no  | up   | 0.78 | no  | 1.03 | no  | up   | 6.8E-02 | no  |
| MSTRG.18206.4 : Cirbp : P60825              | 0.73  | yes | down | 1.3E-04 | yes | chr7  | exon     | first exon      | NA  | 1.24 | no  | up   | 0.69 | no  | 0.85 | no  | down | 3.4E-16 | yes |
| ENSRNOT00000090211 : Nsf11c : O35987        | 16.74 | yes | up   | 1.8E-04 | yes | chr3  | intron   | first intron    | NA  | 0.94 | no  | down | 0.21 | no  | 0.98 | no  | down | 1.6E-03 | yes |
| MSTRG.5399.1 : Eln : Q99372                 | 3.55  | yes | up   | 3.0E-04 | yes | chr12 | intron   | internal intron | NA  | 0.60 | no  | down | 0.09 | no  | 0.82 | yes | down | 3.9E-08 | yes |
| ENSRNOT00000004206 : Mpc2 : P38718          | 0.25  | yes | down | 5.7E-05 | yes | chr13 | promoter | Intermediate    | ICP | 0.87 | no  | down | 0.12 | no  | 0.90 | no  | down | 1.6E-06 | yes |
| MSTRG.9106.1 : Neb1 : F1LVX3                | 0     | yes | down | 3.8E-04 | yes | chr17 | intron   | first intron    | NA  | 0.83 | no  | down | 0.24 | no  | 1.02 | no  | up   | 2.0E-01 | no  |
| MSTRG.8094.6 : Atp13a1 : B5DEX7             | 3.83  | yes | up   | 1.1E-13 | yes | chr16 | intron   | internal intron | NA  | 1.41 | no  | up   | 0.52 | no  | 1.09 | no  | up   | 4.2E-12 | yes |
| ENSRNOT00000061169 : LOC361016 : A0A0G2JXI0 | 10.05 | yes | down | 2.2E-18 | yes | chr15 | intron   | first intron    | NA  | 0.76 | no  | down | 0.23 | no  | 1.05 | no  | up   | 2.5E-01 | no  |
| ENSRNOT00000086605 : Chtop11 : M0RDD7       | 0.48  | yes | down | 9.7E-06 | yes | chr4  | exon     | last exon       | NA  | 0.57 | no  | down | 0.03 | yes | 1.25 | yes | up   | 3.9E-09 | yes |
| MSTRG.9694.1 : Cndp1 : Q66HG3               | 4.65  | yes | up   | 2.7E-05 | yes | chr18 | intron   | last intron     | NA  | 1.00 | no  | down | 0.97 | no  | 1.01 | no  | up   | 5.4E-01 | no  |
| MSTRG.9721.6 : Cdh11 : F1MAH6               | 1.94  | yes | up   | 2.2E-05 | yes | chr19 | exon     | last exon       | NA  | 1.10 | no  | up   | 0.09 | no  | 0.91 | no  | down | 6.5E-11 | yes |
| MSTRG.5804.8 : Clasp1 : F1LNR1              | 0.36  | yes | down | 6.7E-07 | yes | chr13 | intron   | internal intron | NA  | 4.32 | yes | up   | 0.04 | yes | 1.00 | no  | down | 7.0E-01 | no  |
| ENSRNOT00000077484 : Tcpl1l1 : F1M9Y7       | 3.13  | yes | up   | 1.2E-06 | yes | chr3  | intron   | last intron     | NA  | 0.94 | no  | down | 0.69 | no  | 0.99 | no  | down | 8.5E-01 | no  |
| MSTRG.19463.2 : Tyk2 : D3ZD03               | 0.17  | yes | down | 1.5E-06 | yes | chr8  | intron   | internal intron | NA  | 1.04 | no  | up   | 0.75 | no  | 1.01 | no  | up   | 4.7E-01 | no  |
| MSTRG.8345.1 : Fgfr1 : F1LM54               | 0.22  | yes | down | 3.0E-05 | yes | chr16 | exon     | last exon       | NA  | 1.24 | no  | up   | 0.85 | no  | 1.05 | no  | up   | 1.3E-02 | yes |
| MSTRG.19963.4 : Sltn : A0A0G2K904           | 0.34  | yes | down | 6.4E-06 | yes | chr8  | intron   | internal intron | NA  | 1.22 | no  | up   | 0.44 | no  | 0.94 | no  | down | 2.8E-02 | yes |
| ENSRNOT00000076477 : Slfn13 : A0A096MKD0    | 2.27  | yes | up   | 1.5E-04 | yes | chr10 | promoter | Intermediate    | LCP | 1.03 | no  | up   | 0.17 | no  | 0.97 | no  | down | 2.7E-02 | yes |
| MSTRG.10688.1 : Drosha : E9PTR3             | 0.31  | yes | down | 1.4E-04 | yes | chr2  | intron   | internal intron | NA  | 1.54 | no  | up   | 0.35 | no  | 1.00 | no  | up   | 8.3E-01 | no  |
| MSTRG.3850.1 : Pnpo : O88794                | 2.62  | yes | up   | 1.2E-06 | yes | chr10 | intron   | internal intron | NA  | 1.22 | no  | up   | 0.54 | no  | 0.99 | no  | down | 6.7E-01 | no  |
| MSTRG.13870.2 : Plcg1 : G3V845              | 0.24  | yes | down | 1.1E-04 | yes | chr3  | intron   | first intron    | NA  | 1.22 | no  | up   | 0.69 | no  | 0.94 | no  | down | 1.8E-09 | yes |
| ENSRNOT00000001738 : Atp2a2 : P11507        | 0.21  | yes | down | 5.6E-04 | yes | chr12 | intron   | internal intron | NA  | 1.11 | no  | up   | 0.38 | no  | 0.89 | no  | down | 1.5E-13 | yes |
| MSTRG.6713.3 : Fryl : D3ZYQ4                | 2.76  | yes | up   | 1.7E-04 | yes | chr14 | intron   | internal intron | NA  | 0.68 | no  | down | 0.36 | no  | 1.00 | no  | down | 4.6E-01 | no  |
| ENSRNOT000000024575 : Tpm1 : Q923Z2         | 9.41  | yes | up   | 5.1E-14 | yes | chr8  | intron   | internal intron | NA  | 0.69 | no  | down | 0.37 | no  | 0.75 | yes | down | 6.0E-18 | yes |
| MSTRG.10603.5 : Nnt : Q5BJZ3                | 3.00  | yes | up   | 1.8E-04 | yes | chr2  | intron   | internal intron | NA  | 1.00 | no  | down | 0.99 | no  | 0.96 | no  | down | 1.2E-07 | yes |
| MSTRG.16317.5 : Cap1 : Q08163               | 0.21  | yes | down | 1.6E-07 | yes | chr5  | intron   | internal intron | NA  | 1.24 | no  | up   | 0.29 | no  | 0.94 | no  | down | 1.0E-08 | yes |
| MSTRG.18037.2 : Rbms2 : Q4QR81              | 0.04  | yes | down | 2.6E-23 | yes | chr7  | exon     | last exon       | NA  | 1.03 | no  | up   | 0.09 | no  | 1.14 | no  | up   | 2.7E-10 | yes |
| MSTRG.13731.3 : Mapre1 : Q66HR2             | 5.59  | yes | up   | 4.6E-04 | yes | chr3  | intron   | internal intron | NA  | 0.54 | no  | down | 0.32 | no  | 1.03 | no  | up   | 2.1E-03 | yes |
| MSTRG.16461.7 : Pum1 : D3Z8L5               | 0.44  | yes | down | 3.1E-04 | yes | chr5  | intron   | internal intron | NA  | 1.08 | no  | up   | 0.69 | no  | 1.03 | no  | up   | 7.0E-02 | no  |
| MSTRG.8278.15 : Rbpms : F2Z3S5              | 0.02  | yes | down | 2.6E-05 | yes | chr16 | promoter | Proximal        | ICP | 1.23 | no  | up   | 0.15 | no  | 1.06 | no  | up   | 4.9E-05 | yes |
| MSTRG.1683.11 : Il4r : Q63257               | 9.80  | yes | up   | 2.9E-08 | yes | chr1  | intron   | internal intron | NA  | 0.62 | no  | down | 0.05 | yes | 1.11 | no  |      |         |     |

|                                                 |       |     |      |         |     |       |          |                 |     |      |     |      |      |     |      |     |      |         |     |
|-------------------------------------------------|-------|-----|------|---------|-----|-------|----------|-----------------|-----|------|-----|------|------|-----|------|-----|------|---------|-----|
| MSTRG.7470.20 : Acin1 : E9PST5                  | 0.30  | yes | down | 1.1E-04 | yes | chr15 | promoter | Distal          | LCP | 1.06 | no  | up   | 0.91 | no  | 0.98 | no  | down | 5.1E-04 | yes |
| MSTRG.11953.24 : RT1-CE7 : D3ZLE6               | inf   | yes | up   | 7.3E-07 | yes | chr20 | exon     | internal exon   | NA  | 0.80 | no  | down | 0.12 | no  | 1.22 | yes | up   | 7.3E-16 | yes |
| ENSRNOT00000014464 : Anxa6 : Q6IMZ3             | 2.83  | yes | up   | 1.2E-05 | yes | chr10 | intron   | internal intron | NA  | 0.97 | no  | down | 0.56 | no  | 0.84 | no  | down | 6.6E-16 | yes |
| MSTRG.4992.3 : Top3b : D4A9Z2                   | 11.41 | yes | up   | 1.2E-04 | yes | chr11 | intron   | last intron     | NA  | 3.24 | yes | up   | 0.01 | yes | 0.99 | no  | down | 6.1E-01 | no  |
| MSTRG.15110.6 : Wnk1 : Q9JIH7                   | 18.77 | yes | up   | 1.6E-38 | yes | chr4  | exon     | internal exon   | NA  | 0.98 | no  | down | 0.97 | no  | 1.04 | no  | up   | 1.7E-03 | yes |
| ENSRNOT00000019465 : Stat1 : F1M9D6             | 0.50  | yes | down | 1.5E-10 | yes | chr9  | intron   | first intron    | NA  | 1.03 | no  | up   | 0.95 | no  | 1.10 | no  | up   | 1.4E-13 | yes |
| MSTRG.19107.1 : Fbln1 : D3ZQ25                  | 0.23  | yes | down | 7.2E-09 | yes | chr7  | intron   | internal intron | NA  | 2.17 | yes | up   | 0.17 | no  | 1.06 | no  | up   | 1.7E-09 | yes |
| ENSRNOT00000004764 : Efemp1 : Q6AXN2            | 0.06  | yes | down | 2.6E-05 | yes | chr14 | exon     | last exon       | NA  | 0.44 | yes | down | 0.22 | no  | 0.94 | no  | down | 1.1E-08 | yes |
| MSTRG.9568.4 : Nedd41 : F1LRN8                  | 2.03  | yes | up   | 3.6E-05 | yes | chr18 | intron   | internal intron | NA  | 1.14 | no  | up   | 0.25 | no  | 0.95 | no  | down | 3.9E-02 | yes |
| MSTRG.19946.2 : Tln2 : D3ZA84                   | 3.91  | yes | up   | 1.0E-11 | yes | chr8  | intron   | internal intron | NA  | 0.99 | no  | down | 0.96 | no  | 0.87 | no  | down | 7.8E-17 | yes |
| MSTRG.17738.5 : Vrk1 : Q6AYA2                   | 0.22  | yes | down | 2.5E-07 | yes | chr6  | intron   | internal intron | NA  | 0.79 | no  | down | 0.50 | no  | 1.01 | no  | up   | 2.7E-01 | no  |
| ENSRNOT000000086550 : Plec : Q6S395             | 0.33  | yes | down | 4.2E-06 | yes | chr7  | exon     | last exon       | NA  | 1.00 | no  | down | 0.70 | no  | 1.03 | no  | up   | 2.2E-01 | no  |
| MSTRG.20284.8 : Qrich1 : F1M4M7                 | 3.68  | yes | up   | 3.4E-07 | yes | chr8  | exon     | internal exon   | NA  | 1.08 | no  | up   | 0.73 | no  | 1.03 | no  | up   | 2.0E-01 | no  |
| MSTRG.19655.2 : Kmt2a : F1M0L3                  | 0.53  | yes | down | 1.7E-05 | yes | chr8  | exon     | internal exon   | NA  | 1.64 | no  | up   | 0.63 | no  | 0.99 | no  | down | 9.3E-01 | no  |
| MSTRG.10688.2 : Drosha : E9PTR3                 | 0.31  | yes | down | 1.4E-04 | yes | chr2  | intron   | internal intron | NA  | 1.07 | no  | up   | 0.84 | no  | 1.00 | no  | up   | 8.3E-01 | no  |
| MSTRG.9106.3 : Neb1 : F1LVX3                    | 0     | yes | down | 3.8E-04 | yes | chr17 | intron   | first intron    | NA  | 1.01 | no  | up   | 0.09 | no  | 1.02 | no  | up   | 2.0E-01 | no  |
| MSTRG.5983.1 : Cfh : F1M983                     | 0.20  | yes | down | 2.4E-04 | yes | chr13 | intron   | internal intron | NA  | 1.33 | no  | up   | 0.36 | no  | 1.20 | no  | up   | 2.7E-15 | yes |
| MSTRG.10711.2 : Ankh : F1LN34                   | 3.44  | yes | up   | 9.7E-06 | yes | chr2  | intron   | first intron    | NA  | 1.74 | no  | up   | 0.06 | no  | 1.20 | yes | up   | 7.4E-12 | yes |
| MSTRG.21491.1 : Phf8 : D4AD31                   | 0     | yes | down | 2.1E-07 | yes | chrX  | exon     | first exon      | NA  | 0.50 | yes | down | 0.45 | no  | 1.13 | no  | up   | 3.6E-02 | yes |
| MSTRG.11636.1 : Larp7 : M0R7D1                  | 0.06  | yes | down | 3.4E-04 | yes | chr2  | exon     | last exon       | NA  | 0.77 | no  | down | 0.22 | no  | 1.07 | no  | up   | 2.0E-06 | yes |
| ENSRNOT000000092075 : Lims1 : C0KUC5            | 12.34 | yes | up   | 5.9E-05 | yes | chr20 | intron   | internal intron | NA  | 1.11 | no  | up   | 0.58 | no  | 0.77 | yes | down | 1.9E-12 | yes |
| MSTRG.4725.15 : Kalrn : P97924                  | 1.54  | yes | up   | 9.1E-07 | yes | chr11 | exon     | last exon       | NA  | 0.93 | no  | down | 0.56 | no  | 1.04 | no  | up   | 1.6E-04 | yes |
| MSTRG.5482.20 : Ncor2 : A0A0G2JU91              | 2.16  | yes | up   | 1.6E-06 | yes | chr12 | intron   | internal intron | NA  | 0.94 | no  | down | 0.43 | no  | 1.01 | no  | up   | 7.1E-01 | no  |
| ENSRNOT000000044209 : Lrp1b : F1M443            | 0.05  | yes | down | 8.3E-06 | yes | chr3  | intron   | internal intron | NA  | 1.02 | no  | up   | 0.48 | no  | 0.81 | yes | down | 1.7E-02 | yes |
| MSTRG.18268.23 : Akap8 : Q63014                 | 0.08  | yes | down | 2.7E-04 | yes | chr7  | intron   | internal intron | NA  | 1.69 | no  | up   | 0.13 | no  | 0.99 | no  | down | 2.8E-01 | yes |
| MSTRG.9752.2 : Coq9 : Q68FT1                    | 0.32  | yes | down | 5.1E-11 | yes | chr19 | promoter | Distal          | LCP | 0.99 | no  | down | 0.99 | no  | 0.93 | no  | down | 1.8E-05 | no  |
| ENSRNOT000000086812 : Atm : A0A0G2K310          | 0.65  | yes | down | 2.4E-04 | yes | chr8  | intron   | internal intron | NA  | 1.67 | no  | up   | 0.29 | no  | 1.01 | no  | up   | 4.6E-01 | no  |
| MSTRG.1551.1 : Ctr9 : G3V897                    | 12.42 | yes | up   | 1.5E-04 | yes | chr1  | intron   | internal intron | NA  | 0.57 | no  | down | 0.51 | no  | 1.02 | no  | up   | 9.9E-02 | no  |
| ENSRNOT000000083959 : Ptdss1 : Q5PQL5           | 4.36  | yes | up   | 3.7E-04 | yes | chr7  | exon     | first exon      | NA  | 1.11 | no  | up   | 0.49 | no  | 1.08 | no  | up   | 1.2E-04 | yes |
| MSTRG.5410.4 : Gtf2i : Q5U2Y1                   | 5.31  | yes | up   | 4.9E-06 | yes | chr12 | promoter | Distal          | LCP | 1.51 | no  | up   | 0.10 | no  | 0.95 | no  | down | 1.5E-07 | yes |
| ENSRNOT000000092693 : Upf2 : D3ZT03             | 0.21  | yes | down | 9.8E-07 | yes | chr17 | intron   | internal intron | NA  | 1.05 | no  | up   | 0.61 | no  | 1.03 | no  | up   | 3.0E-03 | yes |
| MSTRG.4547.2 : Arl6 : B1WC73                    | 5.24  | yes | up   | 2.5E-08 | yes | chr11 | exon     | first exon      | NA  | 1.27 | no  | up   | 0.00 | yes | 0.98 | no  | down | 1.6E-01 | no  |
| MSTRG.8552.11 : Ddx46 : Q62780                  | 0.56  | yes | down | 3.4E-04 | yes | chr17 | intron   | internal intron | NA  | 0.79 | no  | down | 0.55 | no  | 0.98 | no  | down | 1.3E-01 | no  |
| ENSRNOT00000001466 : Foxk1 : D3ZU55             | 4.61  | yes | up   | 3.7E-14 | yes | chr12 | intron   | internal intron | NA  | 1.11 | no  | up   | 0.76 | no  | 0.99 | no  | down | 5.1E-01 | no  |
| ENSRNOT00000014217 : Cand2 : G3V7E8             | 0.39  | yes | down | 2.9E-04 | yes | chr4  | exon     | internal exon   | NA  | 1.36 | no  | up   | 0.15 | no  | 0.97 | no  | down | 1.3E-05 | yes |
| MSTRG.11223.5 : Fdps : F1LND7                   | inf   | yes | up   | 2.2E-05 | yes | chr2  | exon     | last exon       | NA  | 0.74 | no  | down | 0.31 | no  | 1.07 | no  | up   | 1.2E-03 | yes |
| MSTRG.6320.3 : Cdc42bpa : G3V6C9                | 8.92  | yes | up   | 2.1E-05 | yes | chr13 | intron   | internal intron | NA  | 1.67 | no  | up   | 0.48 | no  | 0.97 | no  | down | 2.5E-04 | yes |
| MSTRG.3793.2 : Lrrc59 : Q5RJR8                  | 4.07  | yes | up   | 4.6E-04 | yes | chr10 | exon     | internal exon   | NA  | 1.80 | no  | up   | 0.04 | yes | 1.13 | no  | up   | 5.6E-13 | yes |
| MSTRG.7226.4 : Sec24c : A0A0G2JZF0              | 3.50  | yes | up   | 1.3E-09 | yes | chr15 | intron   | internal intron | NA  | 1.10 | no  | up   | 0.79 | no  | 1.01 | no  | up   | 2.6E-01 | no  |
| ENSRNOT00000030229 : Ccdc102a : D3ZSR7          | 0.89  | no  | down | 6.8E-05 | yes | chr19 | intron   | internal intron | NA  | 1.11 | no  | up   | 0.43 | no  | 0.95 | no  | down | 3.2E-05 | yes |
| MSTRG.14960.1 : Eogt : Q5NDL0                   | 6.71  | yes | up   | 1.7E-04 | yes | chr4  | intron   | internal intron | NA  | 1.23 | no  | up   | 0.53 | no  | 1.10 | no  | up   | 2.0E-05 | yes |
| ENSRNOT00000039354 : Nfix : F2Z3R4              | 0.58  | yes | down | 1.9E-06 | yes | chr19 | intron   | internal intron | NA  | 0.83 | no  | down | 0.47 | no  | 0.77 | yes | down | 2.4E-14 | yes |
| MSTRG.3379.7 : Dlg4 : P31016                    | 2.15  | yes | up   | 8.6E-07 | yes | chr10 | intron   | last intron     | NA  | 1.09 | no  | up   | 0.60 | no  | 0.97 | no  | down | 9.1E-02 | no  |
| MSTRG.9868.1 : Cc2d1a : Q66HA5                  | 0.21  | yes | down | 1.7E-05 | yes | chr19 | promoter | Distal          | LCP | 1.10 | no  | up   | 0.50 | no  | 0.96 | no  | down | 4.1E-02 | yes |
| MSTRG.12646.3 : Ragef1 : F1M8L9                 | inf   | yes | up   | 4.7E-05 | yes | chr3  | intron   | internal intron | NA  | 1.07 | no  | up   | 0.16 | no  | 0.88 | no  | down | 4.1E-04 | yes |
| ENSRNOT00000015092 : Pkd1 : Q9ERV0              | inf   | yes | up   | 6.6E-05 | yes | chr10 | intron   | internal intron | NA  | 1.01 | no  | up   | 0.28 | no  | 1.19 | no  | up   | 9.8E-07 | yes |
| ENSRNOT00000001766 : Bcr : F1LXF1               | 2.12  | yes | up   | 1.3E-04 | yes | chr20 | intron   | first intron    | NA  | 0.90 | no  | down | 0.56 | no  | 0.96 | no  | down | 8.7E-05 | yes |
| MSTRG.13196.1 : Arhgap1 : D4A6C5                | 3.73  | yes | up   | 1.8E-11 | yes | chr3  | intron   | internal intron | NA  | 0.92 | no  | down | 0.47 | no  | 1.04 | no  | up   | 1.7E-04 | yes |
| MSTRG.4481.2 : Gart : G3V918                    | 0.39  | yes | down | 2.0E-05 | yes | chr11 | intron   | internal intron | NA  | 0.79 | no  | down | 0.36 | no  | 0.96 | no  | down | 6.3E-04 | yes |
| MSTRG.5159.2 : Tecpr1 : Q3ZBA0                  | 0.43  | yes | down | 3.1E-04 | yes | chr12 | promoter | Intermediate    | LCP | 1.45 | no  | up   | 0.33 | no  | 1.17 | no  | up   | 7.7E-08 | yes |
| MSTRG.21938.1 : Khlh13 : F1LM44                 | 0.22  | yes | down | 7.1E-07 | yes | chrX  | intron   | last intron     | NA  | 1.06 | no  | up   | 0.74 | no  | 1.03 | no  | up   | 6.8E-03 | yes |
| MSTRG.11380.1 : Txnlp : Q5M7W1                  | 6.38  | yes | up   | 4.0E-07 | yes | chr2  | exon     | internal exon   | NA  | 0.74 | no  | down | 0.40 | no  | 0.85 | no  | down | 1.0E-06 | yes |
| MSTRG.1443.1 : Arap1 : F1LM60                   | 2.71  | yes | up   | 3.3E-04 | yes | chr1  | intron   | first intron    | NA  | 1.33 | no  | up   | 0.30 | no  | 0.99 | no  | down | 2.5E-02 | yes |
| MSTRG.2907.2 : Unkl : D4A3S7                    | 2.08  | yes | up   | 2.1E-04 | yes | chr10 | intron   | internal intron | NA  | 1.16 | no  | up   | 0.44 | no  | 0.84 | no  | down | 1.1E-15 | yes |
| MSTRG.6982.1 : Morc2 : D4A2C4                   | 6.36  | yes | up   | 1.5E-04 | yes | chr14 | promoter | Proximal        | HCP | 0.67 | no  | down | 0.49 | no  | 0.97 | no  | down | 3.2E-01 | no  |
| MSTRG.19088.2 : Scube1 : F1M987                 | 2.13  | yes | up   | 1.3E-04 | yes | chr7  | intron   | internal intron | NA  | 1.20 | no  | up   | 0.69 | no  | 0.80 | yes | down | 1.2E-14 | yes |
| MSTRG.17733.4 : Atg2b : Q5EBA2                  | 0.42  | yes | down | 4.5E-04 | yes | chr6  | exon     | internal exon   | NA  | 0.79 | no  | down | 0.54 | no  | 1.03 | no  | up   | 1.2E-01 | no  |
| MSTRG.8517.5 : Naa35 : Q6DKG0                   | inf   | yes | up   | 1.7E-04 | yes | chr17 | promoter | Proximal        | LCP | 0.95 | no  | down | 0.84 | no  | 1.04 | no  | up   | 3.3E-02 | yes |
| ENSRNOT00000015946 : Psmal1 : P18420            | 11.23 | yes | up   | 1.1E-12 | yes | chr1  | exon     | last exon       | NA  | 1.24 | no  | up   | 0.01 | yes | 0.92 | no  | down | 1.8E-10 | yes |
| MSTRG.97.7 : Belaf1 : B1WC16                    | 0.67  | yes | down | 1.3E-07 | yes | chr1  | intron   | internal intron | NA  | 0.96 | no  | down | 0.87 | no  | 1.03 | no  | up   | 6.8E-02 | no  |
| MSTRG.3353.4 : Zbtb4 : D4A8X0                   | inf   | yes | up   | 2.4E-05 | yes | chr10 | intron   | last intron     | NA  | 0.86 | no  | down | 0.82 | no  | 0.97 | no  | down | 6.9E-02 | no  |
| MSTRG.11953.31 : RT1-CE7 : D3ZLE6               | inf   | yes | up   | 7.3E-07 | yes | chr20 | exon     | internal exon   | NA  | 0.96 | no  | down | 0.90 | no  | 1.22 | yes | up   | 7.3E-16 | yes |
| MSTRG.8278.22 : Rbpms : F2Z3S5                  | 0.02  | yes | down | 2.6E-05 | yes | chr16 | promoter | Proximal        | ICP | 1.08 | no  | up   | 0.63 | no  | 1.06 | no  | up   | 4.9E-05 | yes |
| ENSRNOT00000013353 : Puf60 : A0A0H2UHZ6         | 0.25  | yes | down | 1.3E-05 | yes | chr7  | exon     | internal exon   | NA  | 0.84 | no  | down | 0.46 | no  | 1.00 | no  | down | 7.4E-02 | no  |
| MSTRG.110.3 : Lama2 : F1M614                    | 0.44  | yes | down | 4.4E-04 | yes | chr1  | intron   | internal intron | NA  | 1.05 | no  | up   | 0.53 | no  | 1.06 | no  | up   | 1.3E-07 | yes |
| MSTRG.3783.4 : Acsf2 : Q499N5                   | 0.31  | yes | down | 5.4E-07 | yes | chr10 | intron   | internal intron | NA  | 1.00 | no  | down | 0.99 | no  | 0.87 | no  | down | 2.4E-13 | yes |
| MSTRG.7470.16 : Acin1 : E9PST5                  | 0.30  | yes | down | 1.1E-04 | yes | chr15 | promoter | Distal          | LCP | 0.47 | yes | down | 0.27 | no  | 0.98 | no  | down | 5.1E-04 | yes |
| MSTRG.3645.11 : Slfn13 : A0A096MKD0             | 2.27  | yes | up   | 1.5E-04 | yes | chr10 | promoter | Intermediate    | LCP | 2.61 | yes | up   | 0.12 | no  | 0.97 | no  | down | 2.7E-02 | yes |
| MSTRG.17688.2 : Golga5 : G3V6Z7                 | 4.67  | yes | up   | 4.2E-17 | yes | chr6  | intron   | last intron     | NA  | 1.84 | no  | up   | 0.17 | no  | 1.07 | no  | up   | 2.3E-12 | yes |
| MSTRG.3895.8 : Cdk12 : A0A0G2K5U7               | 5.94  | yes | up   | 1.1E-04 | yes | chr10 | exon     | first exon      | NA  | 0.75 | no  | down | 0.29 | no  | 0.97 | no  | down | 5.5E-04 | yes |
| ENSRNOT000000080623 : Cdc42bpb : A0A0G2KB580.39 | yes   | yes | down | 3.8E-04 | yes | chr6  | intron   | internal intron | NA  | 0.94 | no  | down | 0.83 | no  | 0.97 | no  | down | 3.6E-07 | yes |
| ENSRNOT000000092739 : Sema4a : A0A1B0GWV9       | 3.09  | yes | up   | 1.9E-04 | yes | chr2  | promoter |                 |     |      |     |      |      |     |      |     |      |         |     |

|                                           |       |     |      |         |     |       |          |                 |     |      |     |      |      |     |      |     |      |         |     |
|-------------------------------------------|-------|-----|------|---------|-----|-------|----------|-----------------|-----|------|-----|------|------|-----|------|-----|------|---------|-----|
| MSTRG.21399.1 : Ddx3x : A0A0G2K719        | 3.18  | yes | up   | 1.4E-05 | yes | chrX  | exon     | first exon      | NA  | 1.52 | no  | up   | 0.52 | no  | 1.11 | no  | up   | 3.1E-07 | yes |
| MSTRG.7395.1 : Supt16h : D4A4J0           | 3.93  | yes | up   | 5.1E-06 | yes | chr15 | intron   | internal intron | NA  | 1.37 | no  | up   | 0.04 | yes | 1.01 | no  | up   | 1.6E-03 | yes |
| MSTRG.16461.9 : Pum1 : D3Z8L5             | 0.44  | yes | down | 3.1E-04 | yes | chr5  | intron   | internal intron | NA  | 0.85 | no  | down | 0.35 | no  | 1.03 | no  | up   | 7.0E-02 | no  |
| ENSRNOT00000007092 : Shmt1 : Q6TXG7       | 0.30  | yes | down | 2.1E-05 | yes | chr10 | intron   | internal intron | NA  | 1.01 | no  | up   | 0.74 | no  | 0.90 | no  | down | 1.3E-08 | yes |
| ENSRNOT000000092890 : Trim21 : D4ACF2     | 0.20  | yes | down | 5.7E-10 | yes | chr1  | promoter | Distal          | LCP | 0.97 | no  | down | 0.51 | no  | 0.96 | no  | down | 1.3E-04 | yes |
| MSTRG.7171.4 : Efemp1 : Q6AXN2            | 0.06  | yes | down | 2.6E-05 | yes | chr14 | exon     | last exon       | NA  | 1.01 | no  | up   | 0.13 | no  | 0.94 | no  | down | 1.1E-08 | yes |
| ENSRNOT000000037115 : Golim4 : D3ZM57     | 0.34  | yes | down | 3.2E-04 | yes | chr2  | intron   | internal intron | NA  | 0.88 | no  | down | 0.60 | no  | 0.55 | yes | down | 1.1E-01 | no  |
| MSTRG.13382.1 : Vps39 : E9PT04            | inf   | yes | up   | 4.3E-04 | yes | chr3  | intron   | internal intron | NA  | 1.01 | no  | up   | 0.97 | no  | 1.08 | no  | up   | 2.7E-04 | yes |
| MSTRG.11285.2 : Npr1 : P18910             | 0.37  | yes | down | 1.2E-04 | yes | chr2  | intron   | internal intron | NA  | 1.27 | no  | up   | 0.71 | no  | 1.02 | no  | up   | 1.6E-02 | yes |
| ENSRNOT000000093119 : Dnajc11 : B1WBV5    | 2.59  | yes | up   | 1.9E-14 | yes | chr5  | promoter | Intermediate    | ICP | 1.05 | no  | up   | 0.66 | no  | 0.88 | no  | down | 4.2E-12 | yes |
| MSTRG.20941.2 : Casp8 : Q9JHX4            | 11.45 | yes | up   | 1.6E-14 | yes | chr9  | intron   | first intron    | NA  | 1.02 | no  | up   | 0.97 | no  | 1.03 | no  | up   | 4.4E-02 | yes |
| ENSRNOT00000076618 : Slfn13 : A0A096MKD0  | 2.27  | yes | up   | 1.5E-04 | yes | chr10 | promoter | Intermediate    | LCP | 1.38 | no  | up   | 0.09 | no  | 0.97 | no  | down | 2.7E-02 | yes |
| MSTRG.8552.2 : Ddx46 : Q62780             | 0.56  | yes | down | 3.4E-04 | yes | chr17 | intron   | internal intron | NA  | 0.76 | no  | down | 0.32 | no  | 0.98 | no  | down | 1.3E-01 | no  |
| MSTRG.4716.4 : Adey5 : G3V9G1             | 0.16  | yes | down | 2.3E-10 | yes | chr11 | intron   | internal intron | NA  | 1.10 | no  | up   | 0.84 | no  | 1.00 | no  | down | 7.6E-01 | no  |
| MSTRG.1731.5 : Tbc1d10b : D3ZSY8          | 1.59  | yes | up   | 2.7E-04 | yes | chr1  | intron   | internal intron | NA  | 0.75 | no  | down | 0.43 | no  | 0.99 | no  | down | 3.1E-01 | no  |
| ENSRNOT000000018170 : Mat2a : F1LRB8      | 0.10  | yes | down | 1.4E-04 | yes | chr4  | exon     | last exon       | NA  | 0.96 | no  | down | 0.59 | no  | 0.99 | no  | down | 1.5E-01 | no  |
| MSTRG.9995.1 : Fhod1 : A0A0G2JZ38         | 0.32  | yes | down | 5.3E-04 | yes | chr19 | exon     | internal exon   | NA  | 1.22 | no  | up   | 0.15 | no  | 1.02 | no  | up   | 1.8E-02 | yes |
| MSTRG.9560.2 : Wdr7 : Q9ERH3              | 0.16  | yes | down | 4.0E-04 | yes | chr18 | promoter | Distal          | LCP | 0.78 | no  | down | 0.66 | no  | 0.99 | no  | down | 6.5E-01 | no  |
| MSTRG.9721.2 : Cdh11 : F1MAH6             | 1.94  | yes | up   | 2.2E-05 | yes | chr19 | exon     | last exon       | NA  | 1.88 | no  | up   | 0.57 | no  | 0.91 | no  | down | 6.5E-11 | yes |
| ENSRNOT000000081866 : Smc5 : D4A9F0       | 4.35  | yes | up   | 2.4E-09 | yes | chr1  | promoter | Distal          | LCP | 0.91 | no  | down | 0.63 | no  | 0.86 | no  | down | 3.1E-03 | yes |
| ENSRNOT000000092442 : Upf2 : D3ZT03       | 0.21  | yes | down | 9.8E-07 | yes | chr17 | intron   | internal intron | NA  | 1.09 | no  | up   | 0.89 | no  | 1.03 | no  | up   | 3.0E-03 | yes |
| MSTRG.20798.1 : Mitd1 : Q5I0J5            | 0.26  | yes | down | 9.9E-05 | yes | chr9  | promoter | Intermediate    | LCP | 0.81 | no  | down | 0.54 | no  | 1.14 | no  | up   | 9.0E-08 | yes |
| MSTRG.323.9 : LOC108348175 : A0A0G2JUS0   | 0.05  | yes | down | 4.0E-19 | yes | chr1  | promoter | Intermediate    | LCP | 1.01 | no  | up   | 0.93 | no  | 1.01 | no  | up   | 4.0E-01 | no  |
| ENSRNOT000000051680 : Gp1bb : Q9JJM7      | 0     | yes | down | 2.2E-04 | yes | chr11 | intron   | internal intron | NA  | 1.32 | no  | up   | 0.33 | no  | 0.93 | no  | down | 7.7E-08 | yes |
| MSTRG.1326.2 : Picalm : Q66WT9            | 8.74  | yes | up   | 2.1E-13 | yes | chr1  | intron   | internal intron | NA  | 1.00 | no  | down | 0.99 | no  | 1.45 | yes | up   | 1.6E-10 | yes |
| ENSRNOT000000015831 : Pum1 : D3Z8L5       | 0.44  | yes | down | 3.1E-04 | yes | chr5  | intron   | internal intron | NA  | 1.01 | no  | up   | 0.92 | no  | 1.03 | no  | up   | 7.0E-02 | no  |
| MSTRG.7179.2 : Cdc88a : D3ZYD7            | 6.58  | yes | up   | 8.2E-05 | yes | chr14 | promoter | Distal          | LCP | 2.27 | yes | up   | 0.14 | no  | 1.03 | no  | up   | 5.3E-03 | yes |
| ENSRNOT00000076967 : Lsm14a : A0A0G2JUK2  | 0.31  | yes | down | 3.8E-04 | yes | chr1  | intron   | last intron     | NA  | 0.94 | no  | down | 0.65 | no  | 1.02 | no  | up   | 2.8E-01 | no  |
| MSTRG.5482.15 : Ncor2 : A0A0G2JU91        | 2.16  | yes | up   | 1.6E-06 | yes | chr12 | intron   | internal intron | NA  | 1.31 | no  | up   | 0.24 | no  | 1.01 | no  | up   | 7.1E-01 | no  |
| ENSRNOT000000089354 : Aamp : B0K024       | 0.09  | yes | down | 2.6E-04 | yes | chr9  | promoter | Intermediate    | LCP | 0.98 | no  | down | 0.94 | no  | 1.06 | no  | up   | 1.5E-05 | yes |
| ENSRNOT000000084554 : Gmpr2 : A0A0G2JX25  | 0.33  | yes | down | 2.2E-06 | yes | chr15 | promoter | Distal          | LCP | 0.92 | no  | down | 0.11 | no  | 0.95 | no  | down | 1.0E-01 | no  |
| MSTRG.5613.4 : Tbx3 : A0A0G2K8D7          | 2.83  | yes | up   | 2.0E-10 | yes | chr12 | intron   | internal intron | NA  | 1.86 | no  | up   | 0.06 | no  | 0.99 | no  | down | 7.3E-01 | no  |
| MSTRG.18037.3 : Rbms2 : Q4QR81            | 0.04  | yes | down | 2.6E-23 | yes | chr7  | exon     | last exon       | NA  | 2.93 | yes | up   | 0.08 | no  | 1.14 | no  | up   | 2.7E-10 | yes |
| ENSRNOT000000020527 : Atf7 : B0BMY0       | 0.38  | yes | down | 7.2E-06 | yes | chr7  | intron   | internal intron | NA  | 1.04 | no  | up   | 0.09 | no  | 1.00 | no  | down | 9.7E-01 | no  |
| ENSRNOT000000047408 : Efl1 : D3ZXJ5       | 2.28  | yes | up   | 1.6E-04 | yes | chr1  | intron   | internal intron | NA  | 1.14 | no  | up   | 0.15 | no  | 0.94 | no  | down | 7.5E-05 | yes |
| MSTRG.18206.9 : Cirbp : P60825            | 0.73  | yes | down | 1.3E-04 | yes | chr7  | exon     | first exon      | NA  | 1.12 | no  | up   | 0.43 | no  | 0.85 | no  | down | 3.4E-16 | yes |
| MSTRG.13391.2 : Lrrc57 : Q5FVI3           | 0.39  | yes | down | 6.1E-06 | yes | chr3  | intron   | internal intron | NA  | 0.88 | no  | down | 0.73 | no  | 0.91 | no  | down | 5.9E-09 | yes |
| ENSRNOT0000000045708 : Phf8 : D4AD31      | 0     | yes | down | 2.1E-07 | yes | chrX  | exon     | first exon      | NA  | 3.41 | yes | up   | 0.17 | no  | 1.13 | no  | up   | 3.6E-02 | yes |
| ENSRNOT000000008210 : Sptbn1 : A0A0G2K8W9 | 5.72  | yes | up   | 4.0E-04 | yes | chr14 | intron   | internal intron | NA  | 1.00 | no  | down | 0.45 | no  | 0.87 | no  | down | 1.1E-18 | yes |
| MSTRG.15798.1 : Tex10 : D4A401            | 5.97  | yes | up   | 4.0E-04 | yes | chr5  | intron   | internal intron | NA  | 1.67 | no  | up   | 0.09 | no  | 0.97 | no  | down | 1.1E-01 | no  |
| ENSRNOT000000020032 : Stat1 : F1M9D6      | 0.50  | yes | down | 1.5E-10 | yes | chr9  | intron   | first intron    | NA  | 1.45 | no  | up   | 0.23 | no  | 1.10 | no  | up   | 1.4E-13 | yes |
| MSTRG.15215.2 : Vwf : F5XVC1              | 0.45  | yes | down | 3.0E-05 | yes | chr4  | intron   | internal intron | NA  | 0.31 | yes | down | 0.02 | yes | 0.74 | yes | down | 1.0E-18 | yes |
| MSTRG.4525.2 : Mx1 : Q499S4               | 3.65  | yes | up   | 1.1E-13 | yes | chr11 | intron   | internal intron | NA  | 1.84 | no  | up   | 0.64 | no  | 1.36 | yes | up   | 1.2E-13 | yes |
| MSTRG.13195.4 : Arhgap1 : D4A6C5          | 3.73  | yes | up   | 1.8E-11 | yes | chr3  | intron   | internal intron | NA  | 0.91 | no  | down | 0.73 | no  | 1.04 | no  | up   | 1.7E-04 | yes |
| ENSRNOT000000073809 : Afrnid : M0RC77     | 4.72  | yes | up   | 9.0E-06 | yes | chr10 | promoter | Intermediate    | LCP | 0.80 | no  | down | 0.18 | no  | 0.81 | yes | down | 7.4E-05 | yes |
| ENSRNOT000000002814 : Fras1 : F1M3H3      | 2.21  | yes | up   | 1.3E-04 | yes | chr14 | intron   | internal intron | NA  | 1.00 | no  | down | 0.87 | no  | 0.81 | yes | down | 2.2E-05 | yes |
| MSTRG.6812.3 : Pcdh7 : Q68HB8             | 0     | yes | down | 4.2E-04 | yes | chr14 | exon     | last exon       | NA  | 0.62 | no  | down | 0.17 | no  | 0.94 | no  | down | 1.0E-07 | yes |
| ENSRNOT000000088945 : Plec : F7F9U6       | 0.33  | yes | down | 4.2E-06 | yes | chr7  | exon     | last exon       | NA  | 1.11 | no  | up   | 0.50 | no  | 0.90 | no  | down | 2.5E-03 | yes |
| ENSRNOT000000080880 : ST7 : A0A0G2KBB5    | 4.88  | yes | up   | 1.5E-16 | yes | chr4  | promoter | Distal          | LCP | 0.99 | no  | down | 0.91 | no  | 1.14 | no  | up   | 1.4E-03 | yes |
| MSTRG.20218.2 : Rpl29 : P25886            | 3.86  | yes | up   | 3.0E-04 | yes | chr8  | intron   | first intron    | NA  | 2.60 | yes | up   | 0.43 | no  | 0.98 | no  | down | 6.0E-01 | no  |
| ENSRNOT000000076266 : Parp4 : A0A096MJR6  | 1.23  | yes | up   | 1.1E-06 | yes | chr15 | intron   | last intron     | NA  | 0.97 | no  | down | 0.67 | no  | 0.95 | no  | down | 6.6E-05 | yes |
| MSTRG.16461.8 : Pum1 : D3Z8L5             | 0.44  | yes | down | 3.1E-04 | yes | chr5  | intron   | internal intron | NA  | 0.91 | no  | down | 0.75 | no  | 1.03 | no  | up   | 7.0E-02 | no  |
| MSTRG.8514.7 : Zcchc6 : D3ZKR9            | 0.14  | yes | down | 1.2E-08 | yes | chr17 | exon     | internal exon   | NA  | 0.92 | no  | down | 0.86 | no  | 1.12 | no  | up   | 2.3E-06 | yes |
| MSTRG.1427.2 : Arhgef17 : A0A0G2JXT9      | 0.45  | yes | down | 6.0E-05 | yes | chr1  | exon     | last exon       | NA  | 1.17 | no  | up   | 0.06 | no  | 0.93 | no  | down | 3.1E-10 | yes |
| ENSRNOT000000082233 : Ddx39b : Q63413     | 0.02  | yes | down | 4.7E-11 | yes | chr20 | exon     | last exon       | NA  | 1.00 | no  | down | 0.48 | no  | 1.01 | no  | up   | 2.0E-01 | no  |
| ENSRNOT000000002403 : Peyt1a : P19836     | 0.29  | yes | down | 1.2E-05 | yes | chr11 | exon     | first exon      | NA  | 0.84 | no  | down | 0.65 | no  | 0.94 | no  | down | 3.3E-07 | yes |
| ENSRNOT000000074738 : Phf11b : M0RB46     | 3.03  | yes | up   | 2.9E-04 | yes | chr15 | promoter | Intermediate    | LCP | 1.59 | no  | up   | 0.29 | no  | 1.15 | no  | up   | 2.3E-06 | yes |
| MSTRG.2021.4 : Unc93b1 : D3ZDJ4           | 3.27  | yes | up   | 6.0E-05 | yes | chr1  | intron   | internal intron | NA  | 0.58 | no  | down | 0.48 | no  | 1.19 | no  | up   | 9.2E-05 | yes |
| MSTRG.5942.1 : Ppp1r12b : D3ZIC4          | 2.69  | yes | up   | 3.9E-04 | yes | chr13 | intron   | internal intron | NA  | 0.86 | no  | down | 0.06 | no  | 0.95 | no  | down | 7.9E-06 | yes |
| ENSRNOT000000067325 : Dnmt1 : D3ZS06      | 0.16  | yes | down | 6.3E-05 | yes | chr8  | intron   | internal intron | NA  | 1.13 | no  | up   | 0.42 | no  | 1.00 | no  | down | 4.1E-01 | no  |
| MSTRG.12655.1 : Gle1 : Q4KLN4             | 0.16  | yes | down | 1.6E-04 | yes | chr3  | promoter | Proximal        | LCP | 0.65 | no  | down | 0.30 | no  | 0.95 | no  | down | 1.3E-02 | yes |
| ENSRNOT000000028244 : Smarcc2 : D4A510    | 6.20  | yes | up   | 2.1E-04 | yes | chr7  | intron   | last intron     | NA  | 1.37 | no  | up   | 0.39 | no  | 0.96 | no  | down | 6.4E-05 | yes |
| ENSRNOT000000020335 : Ptgr1 : P97584      | 12.89 | yes | up   | 1.1E-33 | yes | chr5  | intron   | internal intron | NA  | 1.08 | no  | up   | 0.35 | no  | 0.97 | no  | down | 6.9E-02 | no  |
| MSTRG.21083.12 : Speg : Q63638            | 0.17  | yes | down | 2.6E-06 | yes | chr9  | intron   | internal intron | NA  | 0.90 | no  | down | 0.77 | no  | 0.88 | no  | down | 2.3E-07 | yes |
| MSTRG.6746.7 : Pds5a : A4L9P7             | 1.26  | yes | up   | 1.3E-13 | yes | chr14 | exon     | last exon       | NA  | 1.29 | no  | up   | 0.06 | no  | 1.01 | no  | up   | 2.7E-01 | no  |
| MSTRG.4248.3 : Mxra7 : F1M1U0             | inf   | yes | up   | 4.6E-04 | yes | chr10 | intron   | internal intron | NA  | 0.60 | no  | down | 0.34 | no  | 1.16 | no  | up   | 7.7E-10 | yes |
| ENSRNOT000000032240 : Trappc10 : F1MAQ4   | 0.63  | yes | down | 1.1E-04 | yes | chr20 | exon     | last exon       | NA  | 1.33 | no  | up   | 0.59 | no  | 0.99 | no  | down | 5.9E-01 | no  |
| MSTRG.21926.2 : Pls3 : F1LPK7             | 0     | yes | down | 1.5E-04 | yes | chrX  | intron   | internal intron | NA  | 1.24 | no  | up   | 0.08 | no  | 1.11 | no  | up   | 9.8E-14 | yes |
| ENSRNOT000000036613 : Rbm27 : F1M1R4      | 0.45  | yes | down | 2.5E-04 | yes | chr18 | intron   | internal intron | NA  | 0.96 | no  | down | 0.94 | no  | 1.01 | no  | up   | 5.2E-01 | no  |
| ENSRNOT0000000024714 : Ncoa6 : G3V8C9     | 7.63  | yes | up   | 1.0E-10 | yes | chr3  | exon     | internal exon   | NA  | 0.73 | no  | down | 0.71 | no  | 1.03 | no  | up   | 4.4E-03 | yes |
| ENSRNOT00000010277 : Rbpj : M0R7Q3        | 0.34  | yes | down | 7.0E-05 | yes | chr   |          |                 |     |      |     |      |      |     |      |     |      |         |     |

|                                                |       |     |      |         |     |       |          |                 |     |      |     |      |      |     |      |     |      |         |     |
|------------------------------------------------|-------|-----|------|---------|-----|-------|----------|-----------------|-----|------|-----|------|------|-----|------|-----|------|---------|-----|
| ENSRNOT00000024659 : Slc27a1 : Q6GMM8          | 0.26  | yes | down | 5.6E-15 | yes | chr16 | intron   | internal intron | NA  | 0.60 | no  | down | 0.18 | no  | 0.99 | no  | down | 2.5E-01 | no  |
| ENSRNOT00000029284 : Fgfr1 : FILM54            | 0.22  | yes | down | 3.0E-05 | yes | chr16 | exon     | last exon       | NA  | 1.07 | no  | up   | 0.76 | no  | 1.05 | no  | up   | 1.3E-02 | yes |
| ENSRNOT00000076266 : Parp4 : A0A096MK99        | 1.23  | yes | up   | 1.1E-06 | yes | chr15 | intron   | last intron     | NA  | 0.97 | no  | down | 0.67 | no  | 0.94 | no  | down | 4.1E-06 | yes |
| ENSRNOT00000005611 : Aldh9a1 : A0A0G2JSI1      | 0     | yes | down | 6.8E-05 | yes | chr13 | promoter | Distal          | LCP | 1.11 | no  | up   | 0.19 | no  | 0.91 | no  | down | 3.9E-10 | yes |
| ENSRNOT000000057096 : Timm50 : D3ZJX5          | 0.54  | yes | down | 3.3E-07 | yes | chr1  | exon     | last exon       | NA  | 0.82 | no  | down | 0.03 | yes | 0.98 | no  | down | 4.2E-02 | yes |
| MSTRG.2433.4 : Rnls : Q5U2W9                   | 0.31  | yes | down | 2.4E-05 | yes | chr1  | promoter | Distal          | LCP | 1.13 | no  | up   | 0.09 | no  | 1.02 | no  | up   | 3.0E-01 | no  |
| MSTRG.20752.2 : Ptpn18 : Q4KM54                | 0     | yes | down | 1.9E-04 | yes | chr9  | intron   | first intron    | NA  | 0.86 | no  | down | 0.63 | no  | 1.20 | no  | up   | 1.2E-08 | yes |
| ENSRNOT00000038546 : Car13 : B5DFG6            | 3.23  | yes | up   | 1.2E-05 | yes | chr2  | exon     | last exon       | NA  | 1.19 | no  | up   | 0.02 | yes | 1.15 | no  | up   | 5.8E-10 | yes |
| MSTRG.20878.2 : Glis : A0A0G2KAN7              | 0.05  | yes | down | 1.5E-13 | yes | chr9  | intron   | first intron    | NA  | 0.96 | no  | down | 0.95 | no  | 1.09 | no  | up   | 8.3E-03 | yes |
| MSTRG.21446.2 : Tfe3 : D3ZAW6                  | 0.07  | yes | down | 2.9E-11 | yes | chrX  | exon     | last exon       | NA  | 0.73 | no  | down | 0.18 | no  | 1.04 | no  | up   | 1.6E-03 | yes |
| MSTRG.19538.19 : Nfrib : D4A421                | 0.58  | yes | down | 1.3E-05 | yes | chr8  | intron   | internal intron | NA  | 1.01 | no  | up   | 0.98 | no  | 0.89 | no  | down | 2.5E-03 | yes |
| ENSRNOT00000049756 : Lrrc57 : Q5FVI3           | 0.39  | yes | down | 6.1E-06 | yes | chr3  | intron   | internal intron | NA  | 1.13 | no  | up   | 0.26 | no  | 0.91 | no  | down | 5.9E-09 | yes |
| MSTRG.20350.7 : Clasp2 : A0A0G2JZM8            | 0.25  | yes | down | 1.3E-05 | yes | chr8  | intron   | internal intron | NA  | 1.00 | no  | down | 1.00 | no  | 0.98 | no  | down | 1.8E-01 | no  |
| ENSRNOT00000090717 : Bpgm : Q6P6G4             | 0.17  | yes | down | 4.7E-04 | yes | chr4  | intron   | first intron    | NA  | 1.00 | no  | down | 0.96 | no  | 0.88 | no  | down | 2.8E-09 | yes |
| MSTRG.6812.6 : Pcdh7 : Q68HB8                  | 0     | yes | down | 4.2E-04 | yes | chr14 | exon     | last exon       | NA  | 1.63 | no  | up   | 0.09 | no  | 0.94 | no  | down | 1.0E-07 | yes |
| ENSRNOT00000092730 : Tecpr1 : Q3ZBA0           | 0.43  | yes | down | 3.1E-04 | yes | chr12 | promoter | Intermediate    | LCP | 1.03 | no  | up   | 0.86 | no  | 1.17 | no  | up   | 7.7E-08 | yes |
| MSTRG.6572.1 : Bmp2k : F1M7M4                  | 11.81 | yes | up   | 5.6E-07 | yes | chr14 | intron   | internal intron | NA  | 1.04 | no  | up   | 0.49 | no  | 1.09 | no  | up   | 3.4E-07 | yes |
| MSTRG.9889.8 : Nfix : F2Z3R4                   | 0.58  | yes | down | 1.9E-06 | yes | chr19 | intron   | internal intron | NA  | 1.73 | no  | up   | 0.21 | no  | 0.77 | yes | down | 2.4E-14 | yes |
| MSTRG.2881.11 : Pkd1 : Q9ERV0                  | inf   | yes | up   | 6.6E-05 | yes | chr10 | intron   | internal intron | NA  | 1.70 | no  | up   | 0.03 | yes | 1.19 | no  | up   | 9.8E-07 | yes |
| ENSRNOT00000028632 : Lgi4 : Q6P2A4             | inf   | yes | up   | 6.8E-05 | yes | chr1  | promoter | Proximal        | LCP | 0.75 | no  | down | 0.08 | no  | 0.77 | yes | down | 1.0E-07 | yes |
| MSTRG.7964.2 : Bmpr1a : Q78EA7                 | 0.29  | yes | down | 2.1E-04 | yes | chr16 | intron   | internal intron | NA  | 0.73 | no  | down | 0.50 | no  | 0.90 | no  | down | 9.8E-10 | yes |
| ENSRNOT00000084587 : Pitpnm2 : A0A0G2JW50      | 2.70  | yes | up   | 3.9E-04 | yes | chr12 | promoter | Distal          | LCP | 0.86 | no  | down | 0.29 | no  | 0.89 | no  | down | 1.9E-08 | yes |
| ENSRNOT00000055801 : Ptpa : Q03348             | 0.34  | yes | down | 1.6E-04 | yes | chr3  | exon     | internal exon   | NA  | 0.84 | no  | down | 0.91 | no  | 0.89 | no  | down | 6.4E-12 | yes |
| ENSRNOT00000041155 : Insr : FILPL6             | 0.36  | yes | down | 9.6E-05 | yes | chr12 | intron   | internal intron | NA  | 1.10 | no  | up   | 0.51 | no  | 1.09 | no  | up   | 1.4E-04 | yes |
| MSTRG.13963.4 : Ptgis : Q62969                 | 0.55  | yes | down | 6.0E-05 | yes | chr3  | intron   | internal intron | NA  | 2.36 | yes | up   | 0.39 | no  | 0.99 | no  | down | 7.4E-02 | no  |
| MSTRG.4276.2 : Timp2 : P30121                  | 3.20  | yes | up   | 1.5E-04 | yes | chr10 | exon     | first exon      | NA  | 1.06 | no  | up   | 0.96 | no  | 1.01 | no  | up   | 5.4E-01 | no  |
| MSTRG.11866.3 : RT1-S3 : Q9R0V1                | 0.16  | yes | down | 4.2E-07 | yes | chr20 | exon     | last exon       | NA  | 0.78 | no  | down | 0.85 | no  | 1.05 | no  | up   | 2.0E-01 | no  |
| MSTRG.7350.8 : Ktn1 : D4A4Z9                   | 2.49  | yes | up   | 1.2E-04 | yes | chr15 | intron   | internal intron | NA  | 0.55 | no  | down | 0.12 | no  | 1.04 | no  | up   | 2.2E-11 | yes |
| MSTRG.14722.1 : Dnah6 : Q63169                 | 0.16  | yes | down | 4.2E-04 | yes | chr4  | intron   | internal intron | NA  | 0.55 | no  | down | 0.22 | no  | 0.98 | no  | down | 1.5E-01 | no  |
| MSTRG.7470.5 : Acin1 : E9PST5                  | 0.30  | yes | down | 1.1E-04 | yes | chr15 | promoter | Distal          | LCP | 1.49 | no  | up   | 0.54 | no  | 0.98 | no  | down | 5.1E-04 | yes |
| ENSRNOT00000020509 : Zc3h4 : D3ZVW3            | 2.19  | yes | up   | 2.6E-04 | yes | chr1  | intron   | internal intron | NA  | 0.56 | no  | down | 0.19 | no  | 0.98 | no  | down | 3.2E-01 | no  |
| ENSRNOT00000093426 : Gpx4 : A0A0G2K398         | 0.42  | yes | down | 9.7E-05 | yes | chr7  | intron   | internal intron | NA  | 0.76 | no  | down | 0.30 | no  | 0.91 | no  | down | 1.6E-05 | yes |
| ENSRNOT00000059814 : Exoc1 : A0A0G2K2V5        | inf   | yes | up   | 6.1E-05 | yes | chr14 | intron   | first intron    | NA  | 1.04 | no  | up   | 0.48 | no  | 0.90 | no  | down | 2.2E-04 | yes |
| MSTRG.10475.3 : Tnpol : F1LQP9                 | 24.87 | yes | up   | 1.6E-05 | yes | chr2  | exon     | internal exon   | NA  | 1.76 | no  | up   | 0.47 | no  | 0.98 | no  | down | 5.8E-02 | no  |
| ENSRNOT00000091053 : Mfsd5 : A0A0G2KAK9        | 0.14  | yes | down | 6.3E-05 | yes | chr7  | intron   | first intron    | NA  | 1.00 | no  | down | 0.97 | no  | 1.12 | no  | up   | 3.3E-09 | yes |
| MSTRG.21168.3 : Gigyf2 : A0A096MKC0            | 0.59  | yes | down | 1.9E-05 | yes | chr9  | intron   | internal intron | NA  | 1.54 | no  | up   | 0.06 | no  | 1.01 | no  | up   | 7.0E-01 | no  |
| MSTRG.2881.7 : Pkd1 : Q9ERV0                   | inf   | yes | up   | 6.6E-05 | yes | chr10 | intron   | internal intron | NA  | 0.70 | no  | down | 0.76 | no  | 1.19 | no  | up   | 9.8E-07 | yes |
| MSTRG.4030.2 : Eftud2 : FILM66                 | 4.66  | yes | up   | 6.0E-04 | yes | chr10 | exon     | internal exon   | NA  | 0.82 | no  | down | 0.62 | no  | 1.02 | no  | up   | 4.9E-02 | yes |
| ENSRNOT00000021533 : Maip1 : Q6AY04            | 27.81 | yes | up   | 1.4E-21 | yes | chr9  | promoter | Intermediate    | ICP | 1.10 | no  | up   | 0.58 | no  | 0.87 | no  | down | 5.5E-04 | yes |
| ENSRNOT00000000754 : Bicc1 : A0A0G2K0Y0        | 5.19  | yes | up   | 5.0E-04 | yes | chr20 | intron   | internal intron | NA  | 0.95 | no  | down | 0.82 | no  | 1.52 | yes | up   | 1.2E-05 | yes |
| ENSRNOT00000002524 : Top3b : D4A9Z2            | 11.41 | yes | up   | 1.2E-04 | yes | chr11 | intron   | last intron     | NA  | 1.19 | no  | up   | 0.54 | no  | 0.99 | no  | down | 6.1E-01 | no  |
| ENSRNOT00000081021 : Plec : Q6S3A0             | 0.33  | yes | down | 4.2E-06 | yes | chr7  | exon     | last exon       | NA  | 0.97 | no  | down | 0.44 | no  | 1.11 | no  | up   | 6.0E-08 | yes |
| MSTRG.12303.2 : Lims1 : C0KUC5                 | 12.34 | yes | up   | 5.9E-05 | yes | chr20 | intron   | internal intron | NA  | 1.21 | no  | up   | 0.26 | no  | 0.77 | yes | down | 1.9E-12 | yes |
| MSTRG.9465.3 : Dmxl1 : D4AA13                  | 0.19  | yes | down | 1.3E-04 | yes | chr18 | intron   | internal intron | NA  | 2.75 | yes | up   | 0.01 | yes | 0.95 | no  | down | 3.8E-03 | yes |
| MSTRG.16935.1 : Thada3 : D3ZVT2                | inf   | yes | up   | 4.7E-04 | yes | chr6  | intron   | internal intron | NA  | 1.00 | no  | down | 0.39 | no  | 0.88 | no  | down | 1.3E-03 | yes |
| MSTRG.7229.8 : Usp54 : Q6IE24                  | 0.36  | yes | down | 1.9E-04 | yes | chr15 | intron   | internal intron | NA  | 0.95 | no  | down | 0.95 | no  | 0.83 | yes | down | 7.0E-09 | yes |
| MSTRG.13544.2 : Ptpa : Q03348                  | 0.34  | yes | down | 1.6E-04 | yes | chr3  | exon     | internal exon   | NA  | 1.81 | no  | up   | 0.47 | no  | 0.89 | no  | down | 6.4E-12 | yes |
| MSTRG.97.13 : Bclaf1 : B1WC16                  | 0.67  | yes | down | 1.3E-07 | yes | chr1  | intron   | internal intron | NA  | 0.96 | no  | down | 0.89 | no  | 1.03 | no  | up   | 6.8E-02 | no  |
| ENSRNOT00000080834 : Acap2 : Q5FVC7            | 0.15  | yes | down | 2.4E-05 | yes | chr11 | promoter | Intermediate    | ICP | 1.01 | no  | up   | 0.12 | no  | 0.96 | no  | down | 5.5E-04 | yes |
| ENSRNOT00000070861 : Abcc2 : Q63120            | 9.17  | yes | up   | 9.1E-13 | yes | chr1  | intron   | internal intron | NA  | 1.01 | no  | up   | 0.45 | no  | 0.90 | no  | down | 1.2E-01 | no  |
| ENSRNOT00000092594 : Washc2c : F1LPG9          | 0.05  | yes | down | 2.7E-19 | yes | chr4  | exon     | internal exon   | NA  | 1.03 | no  | up   | 0.23 | no  | 1.05 | no  | up   | 2.1E-05 | yes |
| ENSRNOT00000067892 : Chd5 : D3ZR50             | 0.12  | yes | down | 1.1E-04 | yes | chr5  | intron   | internal intron | NA  | 1.00 | no  | down | 0.24 | no  | 0.87 | no  | down | 3.8E-03 | yes |
| MSTRG.15557.5 : Ints8 : A0A0G2K0V1             | 0.11  | yes | down | 2.1E-05 | yes | chr5  | intron   | last intron     | NA  | 1.21 | no  | up   | 0.20 | no  | 1.07 | no  | up   | 1.6E-05 | yes |
| MSTRG.19963.9 : Sltn : A0A0G2K904              | 0.34  | yes | down | 6.4E-06 | yes | chr8  | intron   | internal intron | NA  | 0.96 | no  | down | 0.93 | no  | 0.94 | no  | down | 2.8E-02 | yes |
| MSTRG.13684.1 : Nsf1c : O35987                 | 16.74 | yes | up   | 1.8E-04 | yes | chr3  | intron   | first intron    | NA  | 1.14 | no  | up   | 0.23 | no  | 0.98 | no  | down | 1.6E-03 | yes |
| MSTRG.1683.4 : Ii4r : Q63257                   | 9.80  | yes | up   | 2.9E-08 | yes | chr1  | intron   | internal intron | NA  | 0.80 | no  | down | 0.26 | no  | 1.11 | no  | up   | 2.1E-05 | yes |
| MSTRG.13195.1 : Arhgap1 : D4A6C5               | 3.73  | yes | up   | 1.8E-11 | yes | chr3  | intron   | internal intron | NA  | 0.88 | no  | down | 0.83 | no  | 1.04 | no  | up   | 1.7E-04 | yes |
| MSTRG.6525.1 : Afh1 : D3ZBU5                   | 1.49  | yes | up   | 9.8E-06 | yes | chr14 | intron   | internal intron | NA  | 0.64 | no  | down | 0.04 | yes | 1.07 | no  | up   | 4.0E-02 | yes |
| ENSRNOT00000012109 : Cpz : A0A0G2JSJ7          | 3.01  | yes | up   | 1.1E-05 | yes | chr14 | intron   | internal intron | NA  | 0.58 | no  | down | 0.02 | yes | 1.08 | no  | up   | 5.1E-02 | no  |
| MSTRG.7171.1 : Efemp1 : Q6AXN2                 | 0.06  | yes | down | 2.6E-05 | yes | chr14 | exon     | last exon       | NA  | 0.76 | no  | down | 0.56 | no  | 0.94 | no  | down | 1.1E-08 | yes |
| ENSRNOT00000018097 : Myl1 : P02600             | 2.29  | yes | up   | 4.3E-05 | yes | chr9  | promoter | Distal          | LCP | 1.59 | no  | up   | 0.09 | no  | 1.33 | yes | up   | 6.1E-13 | yes |
| MSTRG.18809.3 : Trappc9 : B1H266               | 4.58  | yes | up   | 1.4E-09 | yes | chr7  | intron   | internal intron | NA  | 1.16 | no  | up   | 0.17 | no  | 0.94 | no  | down | 3.8E-02 | yes |
| ENSRNOT000000807594 : Vars : Q04462            | 4.99  | yes | up   | 5.5E-05 | yes | chr20 | intron   | internal intron | NA  | 0.80 | no  | down | 0.40 | no  | 1.01 | no  | up   | 2.1E-04 | yes |
| ENSRNOT00000090268 : Sltn : A0A0G2K904         | 0.34  | yes | down | 6.4E-06 | yes | chr8  | intron   | internal intron | NA  | 0.88 | no  | down | 0.29 | no  | 0.94 | no  | down | 2.8E-02 | yes |
| ENSRNOT00000084906 : Camsap3 : A0A0G2K5C0      | 0.05  | yes | down | 5.3E-04 | yes | chr12 | intron   | first intron    | NA  | 0.98 | no  | down | 0.50 | no  | 0.86 | no  | down | 3.4E-07 | yes |
| MSTRG.6151.1 : Selp : A0A096MK10               | inf   | yes | up   | 7.4E-05 | yes | chr13 | promoter | Distal          | LCP | 1.23 | no  | up   | 0.27 | no  | 0.93 | no  | down | 6.5E-03 | yes |
| MSTRG.16606.4 : Alpl : P08289                  | 0.52  | yes | down | 2.4E-04 | yes | chr5  | promoter | Intermediate    | LCP | 0.84 | no  | down | 0.86 | no  | 1.00 | no  | down | 6.2E-01 | no  |
| ENSRNOT00000082998 : RGD1306556 : A0A0G2JZ0.24 | yes   |     | down | 1.7E-04 | yes | chr12 | exon     | internal exon   | NA  | 0.81 | no  | down | 0.66 | no  | 1.28 | yes | up   | 1.1E-07 | yes |
| MSTRG.12896.6 : Rabgap1 : D3ZX42               | 3.82  | yes | up   | 8.1E-06 | yes | chr3  | intron   | internal intron | NA  | 0.82 | no  | down | 0.87 | no  | 1.01 | no  | up   | 1.9E-01 | no  |
| ENSRNOT00000090352 : Sec24c : A0A0G2JZF0       | 3.50  | yes | up   | 1.3E-09 | yes | chr15 | intron   | internal intron | NA  | 6.40 | yes | up   | 0.13 | no  | 1.01 | no  | up   | 2.6E-01 | no  |
| MSTRG.19257.4 : Limal1 : F1LR10                | 0.35  | yes | down | 4.4E-04 | yes | chr7  | intron   | internal intron | NA  |      |     |      |      |     |      |     |      |         |     |

|                                           |       |     |      |         |     |       |          |                 |     |      |     |      |      |     |      |     |      |         |     |
|-------------------------------------------|-------|-----|------|---------|-----|-------|----------|-----------------|-----|------|-----|------|------|-----|------|-----|------|---------|-----|
| ENSRNOT00000005078 : Zdhhc17 : E9PTT0     | 5.08  | yes | up   | 4.0E-04 | yes | chr7  | intron   | internal intron | NA  | 1.04 | no  | up   | 0.58 | no  | 0.94 | no  | down | 1.6E-01 | no  |
| MSTRG.17738.2 : Vrk1 : Q6AYA2             | 0.22  | yes | down | 2.5E-07 | yes | chr6  | intron   | internal intron | NA  | 1.44 | no  | up   | 0.51 | no  | 1.01 | no  | up   | 2.7E-01 | no  |
| MSTRG.12137.5 : Pknox1 : Q5BJP1           | 0.26  | yes | down | 3.4E-07 | yes | chr20 | promoter | Proximal        | LCP | 0.80 | no  | down | 0.52 | no  | 0.89 | no  | down | 7.5E-04 | yes |
| MSTRG.21491.2 : Phf8 : D4AD31             | 0     | yes | down | 2.1E-07 | yes | chrX  | exon     | first exon      | NA  | 0.88 | no  | down | 0.91 | no  | 1.13 | no  | up   | 3.6E-02 | yes |
| MSTRG.19777.6 : Sin3a : A0A0G2K3H5        | 0.53  | yes | down | 4.1E-06 | yes | chr8  | intron   | last intron     | NA  | 0.78 | no  | down | 0.45 | no  | 0.96 | no  | down | 6.2E-05 | yes |
| MSTRG.21175.4 : Inpp5d : F1M981           | 0.08  | yes | down | 9.9E-05 | yes | chr9  | intron   | internal intron | NA  | 0.58 | no  | down | 0.02 | yes | 1.08 | no  | up   | 3.1E-05 | yes |
| ENSRNOT00000005155 : Sod3 : Q08420        | 0.92  | no  | down | 2.3E-05 | yes | chr14 | exon     | last exon       | NA  | 6.71 | yes | up   | 0.35 | no  | 1.18 | no  | up   | 8.5E-11 | yes |
| MSTRG.19956.5 : Myo1e : Q63356            | 3.15  | yes | up   | 9.4E-05 | yes | chr8  | intron   | first intron    | NA  | 0.37 | yes | down | 0.20 | no  | 1.03 | no  | up   | 1.7E-02 | yes |
| ENSRNOT00000029878 : Ptprc : P04157       | 2.98  | yes | up   | 6.9E-14 | yes | chr13 | intron   | internal intron | NA  | 4.37 | yes | up   | 0.08 | no  | 1.12 | no  | up   | 6.1E-15 | yes |
| MSTRG.17673.1 : Ppp4r3a : D4ABC4          | 3.37  | yes | up   | 4.5E-04 | yes | chr6  | intron   | internal intron | NA  | 0.72 | no  | down | 0.06 | no  | 1.03 | no  | up   | 5.4E-03 | yes |
| ENSRNOT00000025795 : Syne1 : Q8VHJ9       | 0.04  | yes | down | 1.5E-19 | yes | chr1  | exon     | first exon      | NA  | 1.02 | no  | up   | 0.78 | no  | 0.89 | no  | down | 8.9E-14 | yes |
| ENSRNOT00000017361 : Rbl2 : G3V7P7        | 0.41  | yes | down | 2.1E-05 | yes | chr19 | intron   | internal intron | NA  | 1.21 | no  | up   | 0.38 | no  | 0.89 | no  | down | 1.5E-05 | yes |
| ENSRNOT00000012376 : Kpn1b1 : F2Z3Q8      | 17.89 | yes | up   | 1.8E-04 | yes | chr10 | intron   | internal intron | NA  | 1.60 | no  | up   | 0.26 | no  | 0.97 | no  | down | 1.9E-07 | yes |
| MSTRG.1326.1 : Picalm : Q66WT9            | 8.74  | yes | up   | 2.1E-13 | yes | chr1  | intron   | internal intron | NA  | 3.98 | yes | up   | 0.01 | yes | 1.45 | yes | up   | 1.6E-10 | yes |
| MSTRG.8514.4 : Zcchc6 : D3ZKR9            | 0.14  | yes | down | 1.2E-08 | yes | chr17 | exon     | internal exon   | NA  | 0.81 | no  | down | 0.03 | yes | 1.12 | no  | up   | 2.3E-06 | yes |
| MSTRG.5704.3 : RGD1306556 : A0A0G2JZ88    | 0.24  | yes | down | 1.7E-04 | yes | chr12 | exon     | internal exon   | NA  | 3.82 | yes | up   | 0.05 | yes | 1.28 | yes | up   | 1.1E-07 | yes |
| MSTRG.5906.10 : Atp2b4 : Q64542           | 2.31  | yes | up   | 1.3E-05 | yes | chr13 | intron   | internal intron | NA  | 1.10 | no  | up   | 0.69 | no  | 0.68 | yes | down | 2.6E-19 | yes |
| ENSRNOT00000025325 : Wdr3 : Q9ERH3        | 0.16  | yes | down | 4.0E-04 | yes | chr18 | promoter | Distal          | LCP | 1.10 | no  | up   | 0.83 | no  | 0.99 | no  | down | 6.5E-01 | no  |
| ENSRNOT000000086365 : Recql : Q6AYJ1      | 0.74  | yes | down | 1.2E-04 | yes | chr4  | exon     | last exon       | NA  | 1.28 | no  | up   | 0.16 | no  | 0.97 | no  | down | 6.1E-03 | yes |
| MSTRG.13928.1 : Pltp : E9PSP1             | 0.31  | yes | down | 3.6E-05 | yes | chr3  | intron   | internal intron | NA  | 2.30 | yes | up   | 0.26 | no  | 0.93 | no  | down | 1.9E-11 | yes |
| MSTRG.11953.35 : RT1-CE7 : D3ZLE6         | inf   | yes | up   | 7.3E-07 | yes | chr20 | exon     | internal exon   | NA  | 1.10 | no  | up   | 0.76 | no  | 1.22 | yes | up   | 7.3E-16 | yes |
| MSTRG.15413.1 : Ipo8 : A0A0G2K6J6         | 3.66  | yes | up   | 4.4E-04 | yes | chr4  | intron   | internal intron | NA  | 1.24 | no  | up   | 0.23 | no  | 1.07 | no  | up   | 4.0E-07 | yes |
| ENSRNOT00000052017 : Cacna1c : F1MA84     | 4.75  | yes | up   | 4.3E-04 | yes | chr4  | intron   | internal intron | NA  | 1.30 | no  | up   | 0.51 | no  | 0.97 | no  | down | 2.7E-02 | yes |
| MSTRG.479.1 : Epn1 : O88339               | 2.09  | yes | up   | 1.9E-04 | yes | chr1  | intron   | internal intron | NA  | 1.11 | no  | up   | 0.64 | no  | 0.99 | no  | down | 3.7E-01 | no  |
| MSTRG.9433.1 : Rbm27 : F1M1R4             | 0.45  | yes | down | 2.5E-04 | yes | chr18 | intron   | internal intron | NA  | 1.21 | no  | up   | 0.43 | no  | 1.01 | no  | up   | 5.2E-01 | no  |
| ENSRNOT00000000155 : Plxdc2 : B5DEZ8      | 3.07  | yes | up   | 1.1E-04 | yes | chr17 | intron   | internal intron | NA  | 0.89 | no  | down | 0.25 | no  | 0.90 | no  | down | 1.5E-10 | yes |
| ENSRNOT00000017633 : Alox5 : F1LMM5       | 0.38  | yes | down | 1.3E-04 | yes | chr4  | intron   | internal intron | NA  | 1.13 | no  | up   | 0.40 | no  | 0.96 | no  | down | 9.7E-06 | yes |
| ENSRNOT000000084217 : Dusp3 : B5DFF7      | 0.16  | yes | down | 1.6E-06 | yes | chr10 | exon     | last exon       | NA  | 1.39 | no  | up   | 0.13 | no  | 0.90 | no  | down | 6.2E-11 | yes |
| ENSRNOT000000080784 : Hdh2 : Q6QI86       | 0.20  | yes | down | 5.1E-06 | yes | chr18 | intron   | first intron    | NA  | 1.39 | no  | up   | 0.49 | no  | 1.04 | no  | up   | 3.3E-03 | yes |
| MSTRG.10007.1 : Ctfcl : Q9R1D1            | 2.29  | yes | up   | 1.4E-04 | yes | chr19 | intron   | internal intron | NA  | 1.16 | no  | up   | 0.08 | no  | 0.94 | no  | down | 4.5E-07 | yes |
| ENSRNOT000000067591 : Ccdc88a : D3ZYD7    | 6.58  | yes | up   | 8.2E-05 | yes | chr14 | promoter | Distal          | LCP | 0.63 | no  | down | 0.17 | no  | 1.03 | no  | up   | 5.3E-03 | yes |
| MSTRG.15546.9 : Asph : A0A096MKE0         | 2.56  | yes | up   | 9.8E-06 | yes | chr5  | intron   | internal intron | NA  | 1.00 | no  | down | 0.98 | no  | 0.99 | no  | down | 1.3E-01 | no  |
| ENSRNOT00000026925 : Fcrl2 : D4A4S5       | 0.21  | yes | down | 8.7E-05 | yes | chr1  | promoter | Distal          | LCP | 0.91 | no  | down | 0.91 | no  | 1.42 | yes | up   | 6.4E-18 | yes |
| ENSRNOT00000050342 : Dyrk1a : Q63470      | 0.26  | yes | down | 2.2E-05 | yes | chr11 | intron   | internal intron | NA  | 1.23 | no  | up   | 0.47 | no  | 1.02 | no  | up   | 1.6E-01 | no  |
| MSTRG.18880.6 : Plcc : Q6S3A0             | 0.33  | yes | down | 4.2E-06 | yes | chr7  | exon     | last exon       | NA  | 0.59 | no  | down | 0.48 | no  | 1.11 | no  | up   | 6.0E-08 | yes |
| MSTRG.3895.3 : Cdk12 : A0A0G2K5U7         | 5.94  | yes | up   | 1.1E-04 | yes | chr10 | exon     | first exon      | NA  | 1.32 | no  | up   | 0.25 | no  | 0.97 | no  | down | 5.5E-04 | yes |
| MSTRG.8094.4 : Atp13a1 : B5DEX7           | 3.83  | yes | up   | 1.1E-13 | yes | chr16 | intron   | internal intron | NA  | 1.13 | no  | up   | 0.75 | no  | 1.09 | no  | up   | 4.2E-12 | yes |
| ENSRNOT000000076099 : Gigyf2 : A0A096MJ14 | 0.59  | yes | down | 1.9E-05 | yes | chr9  | intron   | internal intron | NA  | 0.83 | no  | down | 0.06 | no  | 1.31 | yes | up   | 2.3E-10 | yes |
| ENSRNOT000000066119 : Dpt : B2RZ77        | 6.14  | yes | up   | 2.8E-04 | yes | chr13 | exon     | last exon       | NA  | 0.79 | no  | down | 0.24 | no  | 0.85 | no  | down | 3.5E-10 | yes |
| MSTRG.14075.2 : Dnajc5 : A0A0G2JX56       | 0.30  | yes | down | 1.1E-06 | yes | chr3  | promoter | Intermediate    | HCP | 1.20 | no  | up   | 0.71 | no  | 0.89 | no  | down | 4.0E-08 | yes |
| MSTRG.21168.1 : Gigyf2 : A0A096MJ14       | 0.59  | yes | down | 1.9E-05 | yes | chr9  | intron   | internal intron | NA  | 1.30 | no  | up   | 0.36 | no  | 1.31 | yes | up   | 2.3E-10 | yes |
| ENSRNOT000000080999 : Ctnna1 : Q5U302     | 2.58  | yes | up   | 1.7E-05 | yes | chr18 | intron   | internal intron | NA  | 1.02 | no  | up   | 0.89 | no  | 0.96 | no  | down | 3.1E-09 | yes |
| MSTRG.2839.13 : Srrm2 : A0A0G2K2M9        | 1.72  | yes | up   | 9.0E-05 | yes | chr10 | exon     | internal exon   | NA  | 0.81 | no  | down | 0.69 | no  | 1.00 | no  | up   | 9.0E-01 | no  |
| MSTRG.13841.1 : Rpr1b : B5DEK0            | 0.05  | yes | down | 1.1E-04 | yes | chr3  | intron   | last intron     | NA  | 0.68 | no  | down | 0.44 | no  | 0.98 | no  | down | 1.8E-03 | yes |
| MSTRG.323.10 : LOC108348175 : A0A0G2JUS0  | 0.05  | yes | down | 4.0E-19 | yes | chr1  | promoter | Intermediate    | LCP | 0.99 | no  | down | 0.97 | no  | 1.01 | no  | up   | 4.0E-01 | no  |
| MSTRG.12240.4 : Bicc1 : A0A0G2K0Y0        | 5.19  | yes | up   | 5.0E-04 | yes | chr20 | intron   | internal intron | NA  | 0.61 | no  | down | 0.50 | no  | 1.52 | yes | up   | 1.2E-05 | yes |
| ENSRNOT00000052317 : RGD1310507 : A0A0G2K | 10.49 | yes | up   | 4.2E-04 | yes | chr8  | intron   | internal intron | NA  | 0.98 | no  | down | 0.49 | no  | 1.03 | no  | up   | 1.5E-02 | yes |
| MSTRG.22038.2 : Fmr1 : Q80WE1             | inf   | yes | up   | 3.0E-04 | yes | chrX  | intron   | internal intron | NA  | 0.97 | no  | down | 0.95 | no  | 1.09 | no  | up   | 7.3E-06 | yes |
| ENSRNOT00000072628 : Nup214 : D4ACK1      | 0.13  | yes | down | 4.7E-04 | yes | chr3  | intron   | internal intron | NA  | 0.98 | no  | down | 0.86 | no  | 0.99 | no  | down | 6.9E-01 | no  |
| MSTRG.10128.2 : Terf2ip : Q5EAN7          | 6.13  | yes | up   | 7.3E-09 | yes | chr19 | intron   | first intron    | NA  | 0.20 | yes | down | 0.23 | no  | 1.01 | no  | up   | 4.8E-01 | no  |
| ENSRNOT000000092535 : Shank3 : A0A0U1RS13 | 3.23  | yes | up   | 4.3E-05 | yes | chr7  | exon     | first exon      | NA  | 0.67 | no  | down | 0.09 | no  | 0.98 | no  | down | 1.0E-02 | yes |
| MSTRG.21040.2 : Tns1 : F1LN42             | 0.09  | yes | down | 2.0E-04 | yes | chr9  | intron   | last intron     | NA  | 0.80 | no  | down | 0.48 | no  | 0.86 | no  | down | 7.8E-19 | yes |
| MSTRG.10163.2 : Cdh13 : Q8R490            | 2.07  | yes | up   | 3.3E-06 | yes | chr19 | promoter | Intermediate    | LCP | 0.54 | no  | down | 0.40 | no  | 0.83 | yes | down | 2.3E-16 | yes |
| ENSRNOT00000070994 : Rbm15 : M0R3Z8       | 4.02  | yes | up   | 1.9E-06 | yes | chr2  | exon     | last exon       | NA  | 0.98 | no  | down | 0.87 | no  | 0.94 | no  | down | 2.6E-06 | yes |
| MSTRG.20831.4 : Tgfbra1 : D3ZXT8          | 0.12  | yes | down | 2.5E-04 | yes | chr9  | intron   | internal intron | NA  | 1.10 | no  | up   | 0.78 | no  | 0.98 | no  | down | 2.9E-01 | no  |
| ENSRNOT00000040808 : Tpm1 : A0A0G2JSQ4    | 9.41  | yes | up   | 5.1E-14 | yes | chr8  | intron   | internal intron | NA  | 0.56 | no  | down | 0.42 | no  | 0.81 | yes | down | 2.5E-10 | yes |
| MSTRG.2839.2 : Srrm2 : A0A0G2K2M9         | 1.72  | yes | up   | 9.0E-05 | yes | chr10 | exon     | internal exon   | NA  | 1.53 | no  | up   | 0.65 | no  | 1.00 | no  | up   | 9.0E-01 | no  |
| MSTRG.7561.4 : Phf11b : M0RB46            | 3.03  | yes | up   | 2.9E-04 | yes | chr15 | promoter | Intermediate    | LCP | 1.25 | no  | up   | 0.68 | no  | 1.15 | no  | up   | 2.3E-06 | yes |
| MSTRG.10569.7 : Plpp1 : O08564            | 0.47  | yes | down | 8.3E-05 | yes | chr2  | intron   | internal intron | NA  | 1.71 | no  | up   | 0.05 | yes | 1.04 | no  | up   | 2.9E-03 | yes |
| MSTRG.15855.7 : RGD1306148 : F1M446       | 0.22  | yes | down | 4.0E-05 | yes | chr5  | intron   | internal intron | NA  | 1.61 | no  | up   | 0.47 | no  | 1.01 | no  | up   | 7.4E-02 | no  |
| MSTRG.17118.1 : Atad2b : A0A096MKA5       | 3.51  | yes | up   | 9.0E-07 | yes | chr6  | intron   | internal intron | NA  | 1.13 | no  | up   | 0.67 | no  | 1.15 | no  | up   | 9.1E-06 | yes |
| MSTRG.11265.15 : Ubpap2l : E9PTR4         | 6.62  | yes | up   | 4.0E-04 | yes | chr2  | intron   | internal intron | NA  | 0.91 | no  | down | 0.76 | no  | 1.13 | no  | up   | 3.8E-12 | yes |
| MSTRG.19764.1 : Pstpip1 : B0BNK4          | 0.47  | yes | down | 3.6E-05 | yes | chr8  | intron   | internal intron | NA  | 1.12 | no  | up   | 0.67 | no  | 1.20 | yes | up   | 1.1E-06 | yes |
| MSTRG.19194.1 : Hdac7 : A0A0G2K6B1        | 1.57  | yes | up   | 6.8E-05 | yes | chr7  | intron   | internal intron | NA  | 0.47 | yes | down | 0.06 | no  | 0.99 | no  | down | 6.7E-01 | no  |
| MSTRG.16461.6 : Pum1 : D3Z8L5             | 0.44  | yes | down | 3.1E-04 | yes | chr5  | intron   | internal intron | NA  | 1.01 | no  | up   | 0.96 | no  | 1.03 | no  | up   | 7.0E-02 | no  |
| MSTRG.16324.2 : Pabpc4 : G3V9N0           | 15.58 | yes | up   | 1.8E-05 | yes | chr5  | intron   | first intron    | NA  | 1.27 | no  | up   | 0.23 | no  | 1.10 | no  | up   | 6.8E-12 | yes |
| ENSRNOT000000004762 : Fmo2 : G3V6F6       | 2.66  | yes | up   | 2.1E-11 | yes | chr13 | intron   | internal intron | NA  | 0.84 | no  | down | 0.64 | no  | 1.21 | yes | up   | 2.2E-15 | yes |
| ENSRNOT00000090026 : Glis : P13264        | 0.05  | yes | down | 1.5E-13 | yes | chr9  | intron   | first intron    | NA  | 0.99 | no  | down | 0.99 | no  | 1.08 | no  | up   | 4.1E-02 | yes |
| ENSRNOT000000004780 : Ephx1 : P07687      | 0.19  | yes | down | 2.9E-07 | yes | chr13 | promoter | Intermediate    | LCP | 0.92 | no  | down | 0.69 | no  | 0.69 | yes | down | 5.2E-14 | yes |
| ENSRNOT00000011682 : Rbms1 : A0A0G2K4R7   | 0     | yes | down | 3.3E-05 | yes | chr3  | intron   | internal intron | NA  | 0.81 | no  | down | 0.38 | no  | 0.97 | no  | down | 1.2E-01 | no  |
| MSTRG.2510.3 : Tm9sf3 : D3ZUD8            | 4.98  | yes | up   | 1.2E-05 | yes | chr1  | promoter | Intermediate    | LCP | 0.47 | yes | down | 0.50 |     |      |     |      |         |     |

|                                           |       |     |      |         |     |       |          |                 |     |      |     |      |      |     |      |     |      |         |     |
|-------------------------------------------|-------|-----|------|---------|-----|-------|----------|-----------------|-----|------|-----|------|------|-----|------|-----|------|---------|-----|
| MSTRG.18268.25 : Akap8 : Q63014           | 0.08  | yes | down | 2.7E-04 | yes | chr7  | intron   | internal intron | NA  | 1.12 | no  | up   | 0.21 | no  | 0.99 | no  | down | 2.8E-01 | no  |
| MSTRG.21039.11 : Tns1 : F1LN42            | 0.09  | yes | down | 2.0E-04 | yes | chr9  | intron   | last intron     | NA  | 0.45 | yes | down | 0.43 | no  | 0.86 | no  | down | 7.8E-19 | yes |
| MSTRG.7514.1 : Nfatc4 : A0A0G2K0L1        | 0     | yes | down | 3.3E-04 | yes | chr15 | intron   | internal intron | NA  | 0.97 | no  | down | 0.72 | no  | 1.13 | no  | up   | 1.3E-11 | yes |
| MSTRG.16339.1 : Fhl3 : D3ZPF0             | 0.20  | yes | down | 2.5E-09 | yes | chr5  | exon     | last exon       | NA  | 1.15 | no  | up   | 0.57 | no  | 1.28 | yes | up   | 1.8E-14 | yes |
| MSTRG.20764.2 : Ugg1 : Q9JLA3             | 0.22  | yes | down | 3.9E-04 | yes | chr9  | intron   | internal intron | NA  | 1.02 | no  | up   | 0.98 | no  | 1.11 | no  | up   | 9.8E-15 | yes |
| MSTRG.15110.2 : Wnk1 : Q9JIH7             | 18.77 | yes | up   | 1.6E-38 | yes | chr4  | exon     | internal exon   | NA  | 0.77 | no  | down | 0.36 | no  | 1.04 | no  | up   | 1.7E-03 | yes |
| MSTRG.12945.5 : Fmnl2 : A0A0G2K132        | 0.84  | no  | down | 6.1E-07 | yes | chr3  | intron   | internal intron | NA  | 1.02 | no  | up   | 0.94 | no  | 1.00 | no  | down | 9.6E-01 | no  |
| MSTRG.14075.6 : Dnajc5 : A0A0G2JX56       | 0.30  | yes | down | 1.1E-06 | yes | chr3  | promoter | Intermediate    | HCP | 1.01 | no  | up   | 0.96 | no  | 0.89 | no  | down | 4.0E-08 | yes |
| ENSRNOT00000064025 : Itpr1 : A0A0A0MY31   | 3.16  | yes | up   | 1.1E-05 | yes | chr4  | intron   | internal intron | NA  | 0.39 | yes | down | 0.40 | no  | 0.87 | no  | down | 1.1E-14 | yes |
| MSTRG.4508.1 : Dyrk1a : Q63470            | 0.26  | yes | down | 2.2E-05 | yes | chr11 | intron   | internal intron | NA  | 2.02 | yes | up   | 0.09 | no  | 1.02 | no  | up   | 1.6E-01 | no  |
| MSTRG.7830.8 : Dock9 : F1LSM8             | 0.10  | yes | down | 2.7E-05 | yes | chr15 | intron   | internal intron | NA  | 0.56 | no  | down | 0.22 | no  | 0.97 | no  | down | 2.3E-04 | yes |
| ENSRNOT00000066440 : Cab39 : A0A0G2JZH0   | 39.86 | yes | up   | 1.2E-27 | yes | chr9  | promoter | Intermediate    | LCP | 0.67 | no  | down | 0.22 | no  | 0.99 | no  | down | 5.6E-01 | no  |
| ENSRNOT00000083159 : Rnaseh2a : Q5U209    | 14.16 | yes | up   | 1.1E-05 | yes | chr19 | intron   | last intron     | NA  | 0.56 | no  | down | 0.03 | yes | 1.08 | no  | up   | 2.6E-05 | yes |
| MSTRG.11223.6 : Fdps : F1LND7             | inf   | yes | up   | 2.2E-05 | yes | chr2  | exon     | last exon       | NA  | 0.71 | no  | down | 0.47 | no  | 1.07 | no  | up   | 1.2E-03 | yes |
| ENSRNOT00000076560 : Dyncl1i2 : Q5D023    | 0.17  | yes | down | 2.9E-04 | yes | chr19 | intron   | last intron     | NA  | 0.91 | no  | down | 0.61 | no  | 0.99 | no  | down | 1.1E-01 | no  |
| MSTRG.5482.23 : Ncor2 : A0A0G2JU91        | 2.16  | yes | up   | 1.6E-06 | yes | chr12 | intron   | internal intron | NA  | 1.24 | no  | up   | 0.60 | no  | 1.01 | no  | up   | 7.1E-01 | no  |
| ENSRNOT00000080682 : Specc1 : A0A0G2K5D7  | 5.53  | yes | up   | 1.9E-10 | yes | chr10 | exon     | last exon       | NA  | 0.58 | no  | down | 0.19 | no  | 0.93 | no  | down | 4.4E-09 | yes |
| MSTRG.4992.7 : Top3b : D4A9Z2             | 11.41 | yes | up   | 1.2E-04 | yes | chr11 | intron   | last intron     | NA  | 0.61 | no  | down | 0.45 | no  | 0.99 | no  | down | 6.1E-01 | no  |
| ENSRNOT00000080846 : Bicc1 : A0A0G2K0Y0   | 5.19  | yes | up   | 5.0E-04 | yes | chr20 | intron   | internal intron | NA  | 0.82 | no  | down | 0.81 | no  | 1.52 | yes | up   | 1.2E-05 | yes |
| ENSRNOT00000088807 : Lrba : A0A0G2JYI0    | 10.95 | yes | up   | 4.8E-12 | yes | chr2  | intron   | internal intron | NA  | 0.90 | no  | down | 0.78 | no  | 0.94 | no  | down | 4.5E-07 | yes |
| MSTRG.15469.4 : Traml : Q5XI41            | 3.29  | yes | up   | 2.9E-05 | yes | chr5  | exon     | last exon       | NA  | 0.52 | no  | down | 0.50 | no  | 1.13 | no  | up   | 1.2E-09 | yes |
| MSTRG.7561.3 : Phf11b : M0RB46            | 3.03  | yes | up   | 2.9E-04 | yes | chr15 | promoter | Intermediate    | LCP | 0.84 | no  | down | 0.18 | no  | 1.15 | no  | up   | 2.3E-06 | yes |
| MSTRG.4525.5 : Mx1 : Q499S4               | 3.65  | yes | up   | 1.1E-13 | yes | chr11 | intron   | internal intron | NA  | 4.56 | yes | up   | 0.03 | yes | 1.36 | yes | up   | 1.2E-13 | yes |
| MSTRG.97.4 : Belaf1 : B1WC16              | 0.67  | yes | down | 1.3E-07 | yes | chr1  | intron   | internal intron | NA  | 1.40 | no  | up   | 0.12 | no  | 1.03 | no  | up   | 6.8E-02 | no  |
| MSTRG.18046.6 : Pan2 : R9PXX6             | 2.14  | yes | up   | 4.2E-04 | yes | chr7  | exon     | internal exon   | NA  | 0.62 | no  | down | 0.28 | no  | 0.84 | no  | down | 1.2E-03 | yes |
| MSTRG.10325.1 : Cast : F1LPH1             | 0.36  | yes | down | 1.6E-06 | yes | chr2  | intron   | internal intron | NA  | 1.07 | no  | up   | 0.84 | no  | 0.95 | no  | down | 2.4E-10 | yes |
| ENSRNOT00000073955 : Apoo : M0R7G4        | 22.85 | yes | up   | 2.9E-05 | yes | chrX  | intron   | first intron    | NA  | 0.85 | no  | down | 0.74 | no  | 0.95 | no  | down | 2.3E-02 | yes |
| MSTRG.8514.10 : Zcchc6 : D3ZKR9           | 0.14  | yes | down | 1.2E-08 | yes | chr17 | exon     | internal exon   | NA  | 1.25 | no  | up   | 0.48 | no  | 1.12 | no  | up   | 2.3E-06 | yes |
| ENSRNOT00000064785 : Ptpcr : P04157       | 2.98  | yes | up   | 6.9E-14 | yes | chr13 | intron   | internal intron | NA  | 1.20 | no  | up   | 0.75 | no  | 1.12 | no  | up   | 6.1E-15 | yes |
| MSTRG.9775.1 : Gnao1 : P59215             | 0.45  | yes | down | 1.5E-04 | yes | chr19 | exon     | internal exon   | NA  | 0.69 | no  | down | 0.16 | no  | 0.81 | yes | down | 3.6E-12 | yes |
| MSTRG.20927.4 : Aox1 : F1LRQ1             | 0.36  | yes | down | 1.5E-07 | yes | chr9  | intron   | internal intron | NA  | 0.90 | no  | down | 0.81 | no  | 0.73 | yes | down | 3.5E-17 | yes |
| MSTRG.7830.6 : Dock9 : F1LSM8             | 0.10  | yes | down | 2.7E-05 | yes | chr15 | intron   | internal intron | NA  | 0.82 | no  | down | 0.68 | no  | 0.97 | no  | down | 2.3E-04 | yes |
| MSTRG.6685.3 : Exoc1 : Q4V8H2             | inf   | yes | up   | 6.1E-05 | yes | chr14 | intron   | first intron    | NA  | 0.68 | no  | down | 0.42 | no  | 0.91 | no  | down | 3.2E-04 | yes |
| MSTRG.12973.9 : Rbms1 : A0A0G2K4R7        | 0     | yes | down | 3.3E-05 | yes | chr3  | intron   | internal intron | NA  | 0.84 | no  | down | 0.52 | no  | 0.97 | no  | down | 1.2E-01 | no  |
| MSTRG.13391.3 : Lrrc57 : Q5FV13           | 0.39  | yes | down | 6.1E-06 | yes | chr3  | intron   | internal intron | NA  | 0.90 | no  | down | 0.75 | no  | 0.91 | no  | down | 5.9E-09 | yes |
| MSTRG.11405.1 : Pde4dip : A0A0G2JW66      | 6.94  | yes | up   | 5.0E-08 | yes | chr2  | exon     | internal exon   | NA  | 2.31 | yes | up   | 0.01 | yes | 1.06 | no  | up   | 5.1E-04 | yes |
| MSTRG.11985.2 : Vars : Q04462             | 4.99  | yes | up   | 5.5E-05 | yes | chr20 | intron   | internal intron | NA  | 1.34 | no  | up   | 0.25 | no  | 1.01 | no  | up   | 2.1E-04 | yes |
| MSTRG.13080.1 : Lnpk : A0JN29             | 3.42  | yes | up   | 1.2E-11 | yes | chr3  | intron   | internal intron | NA  | 1.00 | no  | down | 1.00 | no  | 0.96 | no  | down | 2.6E-04 | yes |
| MSTRG.8552.10 : Ddx46 : Q62780            | 0.56  | yes | down | 3.4E-04 | yes | chr17 | intron   | internal intron | NA  | 1.07 | no  | up   | 0.81 | no  | 0.98 | no  | down | 1.3E-01 | no  |
| ENSRNOT00000031365 : Creb5 : A0A0G2K5F0   | 0.10  | yes | down | 1.8E-23 | yes | chr4  | intron   | internal intron | NA  | 0.98 | no  | down | 0.86 | no  | 1.01 | no  | up   | 7.4E-01 | no  |
| MSTRG.15089.4 : Csgalnact2 : D4A5Z0       | 2.74  | yes | up   | 6.9E-07 | yes | chr4  | intron   | internal intron | NA  | 0.86 | no  | down | 0.45 | no  | 0.94 | no  | down | 1.2E-02 | yes |
| ENSRNOT00000085259 : Ppp1r18 : A0A0G2K8B3 | 0.32  | yes | down | 2.0E-04 | yes | chr20 | promoter | Distal          | LCP | 1.11 | no  | up   | 0.74 | no  | 1.10 | no  | up   | 1.1E-05 | yes |
| MSTRG.4117.1 : Nol11 : A0A0G2K1A9         | 0.21  | yes | down | 9.6E-05 | yes | chr10 | intron   | internal intron | NA  | 1.08 | no  | up   | 0.60 | no  | 1.06 | no  | up   | 1.9E-03 | yes |
| MSTRG.19472.5 : Dnm2 : A0A0A0MY48         | 0.11  | yes | down | 8.9E-11 | yes | chr8  | intron   | first intron    | NA  | 1.09 | no  | up   | 0.64 | no  | 1.05 | no  | up   | 2.0E-08 | yes |
| MSTRG.11265.7 : Ubp2l : E9PTR4            | 6.62  | yes | up   | 4.0E-04 | yes | chr2  | intron   | internal intron | NA  | 2.09 | yes | up   | 0.18 | no  | 1.13 | no  | up   | 3.8E-12 | yes |
| MSTRG.10878.1 : Anxa5 : P14668            | 3.34  | yes | up   | 1.2E-08 | yes | chr2  | promoter | Distal          | LCP | 0.47 | yes | down | 0.36 | no  | 0.88 | no  | down | 2.2E-14 | yes |
| ENSRNOT00000093270 : Nup214 : D4ACK1      | 0.13  | yes | down | 4.7E-04 | yes | chr3  | intron   | internal intron | NA  | 0.99 | no  | down | 0.21 | no  | 0.99 | no  | down | 6.9E-01 | no  |
| ENSRNOT00000000733 : Fyn : Q62844         | 0.38  | yes | down | 2.4E-05 | yes | chr20 | exon     | last exon       | NA  | 1.06 | no  | up   | 0.82 | no  | 1.01 | no  | up   | 5.2E-01 | no  |
| MSTRG.3379.1 : Dlg4 : P31016              | 2.15  | yes | up   | 8.6E-07 | yes | chr10 | intron   | last intron     | NA  | 1.39 | no  | up   | 0.09 | no  | 0.97 | no  | down | 9.1E-02 | no  |
| ENSRNOT00000026643 : Vwf : F5XVC1         | 0.45  | yes | down | 3.0E-05 | yes | chr4  | intron   | internal intron | NA  | 0.53 | no  | down | 0.03 | yes | 0.74 | yes | down | 1.0E-18 | yes |
| MSTRG.5509.5 : Pitpm2 : A0A0G2JW50        | 2.70  | yes | up   | 3.9E-04 | yes | chr12 | promoter | Distal          | LCP | 0.70 | no  | down | 0.40 | no  | 0.89 | no  | down | 1.9E-08 | yes |
| ENSRNOT00000010127 : C1qtnf5 : Q5FVH0     | 0.32  | yes | down | 9.8E-07 | yes | chr8  | exon     | last exon       | NA  | 1.10 | no  | up   | 0.89 | no  | 0.96 | no  | down | 2.5E-05 | yes |
| ENSRNOT00000050980 : Fgfr1 : F1LM54       | 0.22  | yes | down | 3.0E-05 | yes | chr16 | exon     | last exon       | NA  | 1.36 | no  | up   | 0.29 | no  | 1.05 | no  | up   | 1.3E-02 | yes |
| ENSRNOT00000093297 : Mycbp2 : A0A1W2Q6I3  | 0.31  | yes | down | 9.2E-06 | yes | chr15 | intron   | internal intron | NA  | 1.09 | no  | up   | 0.59 | no  | 1.00 | no  | up   | 8.8E-01 | no  |
| MSTRG.1668.4 : Prkeb : A0A0G2K5Q0         | 3.82  | yes | up   | 4.6E-04 | yes | chr1  | intron   | internal intron | NA  | 0.92 | no  | down | 0.84 | no  | 1.10 | no  | up   | 1.7E-07 | yes |
| MSTRG.19538.5 : Nfrikb : D4A421           | 0.58  | yes | down | 1.3E-05 | yes | chr8  | intron   | internal intron | NA  | 0.82 | no  | down | 0.57 | no  | 0.89 | no  | down | 2.5E-03 | yes |
| ENSRNOT00000023302 : Myh6 : G3V885        | 2.81  | yes | up   | 4.8E-05 | yes | chr15 | intron   | internal intron | NA  | 0.96 | no  | down | 0.31 | no  | 0.68 | yes | down | 6.8E-16 | yes |
| MSTRG.2768.3 : Usp7 : F1LM09              | inf   | yes | up   | 5.0E-04 | yes | chr10 | intron   | internal intron | NA  | 0.60 | no  | down | 0.34 | no  | 1.00 | no  | down | 7.8E-01 | no  |
| MSTRG.2579.5 : Sfxn3 : Q9JHY2             | 0.39  | yes | down | 7.8E-05 | yes | chr1  | intron   | internal intron | NA  | 0.48 | yes | down | 0.08 | no  | 0.98 | no  | down | 7.5E-03 | yes |
| MSTRG.12201.1 : Gst3 : D3Z8I7             | 0.44  | yes | down | 5.4E-04 | yes | chr20 | promoter | Intermediate    | LCP | 0.83 | no  | down | 0.69 | no  | 0.92 | no  | down | 4.5E-04 | yes |
| ENSRNOT00000088624 : Nedd4l : F1LRN8      | 2.03  | yes | up   | 3.6E-05 | yes | chr18 | intron   | internal intron | NA  | 0.98 | no  | down | 0.36 | no  | 0.95 | no  | down | 3.9E-02 | yes |
| MSTRG.12896.7 : Rabgap1 : D3ZX42          | 3.82  | yes | up   | 8.1E-06 | yes | chr3  | intron   | internal intron | NA  | 1.10 | no  | up   | 0.86 | no  | 1.01 | no  | up   | 1.9E-01 | no  |
| MSTRG.21367.1 : Uba1 : Q5U300             | 0     | yes | down | 1.9E-08 | yes | chrX  | exon     | last exon       | NA  | 1.28 | no  | up   | 0.29 | no  | 0.93 | no  | down | 2.8E-14 | yes |
| ENSRNOT00000010118 : Akap9 : F1LPB4       | 2.74  | yes | up   | 2.9E-04 | yes | chr4  | intron   | internal intron | NA  | 1.01 | no  | up   | 0.74 | no  | 1.05 | no  | up   | 2.3E-05 | yes |
| MSTRG.5280.2 : Taf6 : Q498R0              | 0.74  | yes | down | 2.2E-06 | yes | chr12 | intron   | internal intron | NA  | 0.75 | no  | down | 0.09 | no  | 0.91 | no  | down | 1.8E-03 | yes |
| MSTRG.18264.1 : Notch3 : F1LQX7           | 0.61  | yes | down | 2.1E-04 | yes | chr7  | exon     | internal exon   | NA  | 1.57 | no  | up   | 0.11 | no  | 0.96 | no  | down | 9.5E-04 | yes |
| ENSRNOT00000091230 : Exoc1 : A0A0G2K2V5   | inf   | yes | up   | 6.1E-05 | yes | chr14 | intron   | first intron    | NA  | 0.83 | no  | down | 0.23 | no  | 0.90 | no  | down | 2.2E-04 | yes |
| MSTRG.21176.7 : Inpp5d : F1M981           | 0.08  | yes | down | 9.9E-05 | yes | chr9  | intron   | internal intron | NA  | 0.81 | no  | down | 0.33 | no  | 1.08 | no  | up   | 3.1E-05 | yes |
| MSTRG.16309.1 : Zmpste24 : D4A5K6         | 2.42  | yes | up   | 2.9E-04 | yes | chr5  | promoter | Proximal        | LCP | 0.99 | no  | down | 0.96 | no  | 0.98 | no  | down | 1.5E-05 | yes |
| MSTRG.3024.1 : Sgcd : F1LYS7              | 0.12  | yes | down | 5.4E-11 | yes | chr10 | intron   | internal intron | NA  | 1.06 | no  | up   | 0.58 | no  | 0.81 | yes | down | 2.9E-17 | yes |
| ENSRNOT00000021648 : Cirbp : P60825       | 0.73  | yes | down | 1.3E-04 | yes | chr7  | exon     | first exon      | NA  | 0.77 | no  | down | 0.65 | no  | 0.85 | no  | down | 3.4E-16 | yes |
| MSTRG.479.2                               |       |     |      |         |     |       |          |                 |     |      |     |      |      |     |      |     |      |         |     |

|                                            |       |     |      |         |     |       |          |                 |     |      |     |      |      |     |      |     |      |         |     |
|--------------------------------------------|-------|-----|------|---------|-----|-------|----------|-----------------|-----|------|-----|------|------|-----|------|-----|------|---------|-----|
| ENSRNOT00000092524 : Washe2c : F1LPG9      | 0.05  | yes | down | 2.7E-19 | yes | chr4  | exon     | internal exon   | NA  | 1.11 | no  | up   | 0.32 | no  | 1.05 | no  | up   | 2.1E-05 | yes |
| MSTRG.21085.2 : Chpf : Q5XIQ8              | 1.40  | yes | up   | 4.1E-04 | yes | chr9  | intron   | internal intron | NA  | 2.05 | yes | up   | 0.06 | no  | 1.00 | no  | down | 8.4E-01 | no  |
| ENSRNOT0000008288 : Sptbn2 : F1MA36        | 0.33  | yes | down | 1.2E-08 | yes | chr1  | intron   | internal intron | NA  | 0.95 | no  | down | 0.22 | no  | 0.96 | no  | down | 3.4E-01 | no  |
| MSTRG.19538.3 : Nfkb : D4A421              | 0.58  | yes | down | 1.3E-05 | yes | chr8  | intron   | internal intron | NA  | 1.12 | no  | up   | 0.52 | no  | 0.89 | no  | down | 2.5E-03 | yes |
| ENSRNOT00000009104 : Gefc2 : D4A3Z4        | 0.38  | yes | down | 6.2E-05 | yes | chr4  | intron   | first intron    | NA  | 0.89 | no  | down | 0.47 | no  | 0.96 | no  | down | 1.9E-01 | no  |
| MSTRG.2010.6 : Ppp6r3 : D3ZBT9             | 3.21  | yes | up   | 8.1E-07 | yes | chr1  | intron   | internal intron | NA  | 0.74 | no  | down | 0.07 | no  | 0.98 | no  | down | 7.0E-03 | yes |
| ENSRNOT00000093260 : Mycbp2 : D4A2D3       | 0.31  | yes | down | 9.2E-06 | yes | chr15 | intron   | internal intron | NA  | 0.97 | no  | down | 0.34 | no  | 1.00 | no  | up   | 6.8E-01 | no  |
| MSTRG.8233.2 : Fat1 : G3V9W9               | 0.12  | yes | down | 1.5E-10 | yes | chr16 | exon     | last exon       | NA  | 0.48 | yes | down | 0.51 | no  | 1.12 | no  | up   | 2.9E-12 | yes |
| MSTRG.11265.33 : Ubap2l : E9PTR4           | 6.62  | yes | up   | 4.0E-04 | yes | chr2  | intron   | internal intron | NA  | 0.97 | no  | down | 0.93 | no  | 1.13 | no  | up   | 3.8E-12 | yes |
| ENSRNOT00000023648 : Ppme1 : Q4FZT2        | 16.52 | yes | up   | 4.2E-04 | yes | chr1  | intron   | internal intron | NA  | 0.74 | no  | down | 0.12 | no  | 1.02 | no  | up   | 3.9E-05 | yes |
| MSTRG.16606.1 : Alpl : P08289              | 0.52  | yes | down | 2.4E-04 | yes | chr5  | promoter | Intermediate    | LCP | 1.22 | no  | up   | 0.71 | no  | 1.00 | no  | down | 6.2E-01 | no  |
| MSTRG.21083.3 : Speg : Q63638              | 0.17  | yes | down | 2.6E-06 | yes | chr9  | intron   | internal intron | NA  | 2.02 | yes | up   | 0.34 | no  | 0.88 | no  | down | 2.3E-07 | yes |
| ENSRNOT00000064495 : Clqtm7 : B2RYB7       | 3.60  | yes | up   | 9.8E-06 | yes | chr14 | exon     | last exon       | NA  | 0.60 | no  | down | 0.13 | no  | 0.87 | no  | down | 2.3E-09 | yes |
| MSTRG.20879.4 : Stat1 : F1M9D6             | 0.50  | yes | down | 1.5E-10 | yes | chr9  | intron   | first intron    | NA  | 1.22 | no  | up   | 0.58 | no  | 1.10 | no  | up   | 1.4E-13 | yes |
| MSTRG.20879.2 : Stat1 : F1M9D6             | 0.50  | yes | down | 1.5E-10 | yes | chr9  | intron   | first intron    | NA  | 2.03 | yes | up   | 0.12 | no  | 1.10 | no  | up   | 1.4E-13 | yes |
| MSTRG.14960.4 : Eogt : Q5NDL0              | 6.71  | yes | up   | 1.7E-04 | yes | chr4  | intron   | internal intron | NA  | 0.77 | no  | down | 0.71 | no  | 1.10 | no  | up   | 2.0E-05 | yes |
| MSTRG.15855.2 : RGD1306148 : F1M446        | 0.22  | yes | down | 4.0E-05 | yes | chr5  | intron   | internal intron | NA  | 0.48 | yes | down | 0.45 | no  | 1.01 | no  | up   | 7.4E-02 | no  |
| MSTRG.11888.7 : Ppp1r18 : A0A0G2K8B3       | 0.32  | yes | down | 2.0E-04 | yes | chr20 | promoter | Distal          | LCP | 1.26 | no  | up   | 0.64 | no  | 1.10 | no  | up   | 1.1E-05 | yes |
| ENSRNOT00000009173 : Arid1a : D4A3E3       | 0.22  | yes | down | 1.1E-04 | yes | chr5  | intron   | first intron    | NA  | 1.20 | no  | up   | 0.74 | no  | 1.00 | no  | down | 2.1E-01 | no  |
| MSTRG.1731.1 : Tbc1d10b : D3ZSY8           | 1.59  | yes | up   | 2.7E-04 | yes | chr1  | intron   | internal intron | NA  | 0.93 | no  | down | 0.89 | no  | 0.99 | no  | down | 3.1E-01 | no  |
| MSTRG.6812.1 : Pcdh7 : Q68HB8              | 0     | yes | down | 4.2E-04 | yes | chr14 | exon     | last exon       | NA  | 0.84 | no  | down | 0.65 | no  | 0.94 | no  | down | 1.0E-07 | yes |
| ENSRNOT00000091702 : Lima1 : F1LR10        | 0.35  | yes | down | 4.4E-04 | yes | chr7  | intron   | internal intron | NA  | 0.32 | yes | down | 0.09 | no  | 1.16 | no  | up   | 2.2E-10 | yes |
| MSTRG.21205.1 : Ube2f : Q5U203             | 7.18  | yes | up   | 7.2E-05 | yes | chr9  | intron   | internal intron | NA  | 1.07 | no  | up   | 0.87 | no  | 1.01 | no  | up   | 5.6E-01 | no  |
| ENSRNOT00000076699 : Yipf6 : A0A096MJG6    | inf   | yes | up   | 3.8E-06 | yes | chrX  | intron   | first intron    | NA  | 1.00 | no  | down | 0.73 | no  | 1.03 | no  | up   | 1.9E-01 | no  |
| MSTRG.3511.5 : Cpd : A0A0G2JY30            | 0.15  | yes | down | 4.3E-04 | yes | chr10 | intron   | internal intron | NA  | 0.73 | no  | down | 0.51 | no  | 1.13 | no  | up   | 1.1E-08 | yes |
| ENSRNOT00000011401 : Tex10 : D4A401        | 5.97  | yes | up   | 4.0E-04 | yes | chr5  | intron   | internal intron | NA  | 0.84 | no  | down | 0.45 | no  | 0.97 | no  | down | 1.1E-01 | no  |
| MSTRG.3521.1 : Inpp5k : A0A0G2K2Z2         | 8.85  | yes | up   | 4.8E-08 | yes | chr10 | promoter | Distal          | ICP | 0.93 | no  | down | 0.26 | no  | 0.94 | no  | down | 3.3E-03 | yes |
| ENSRNOT00000068334 : Dcun1d1 : D3ZRV0      | 1.60  | yes | up   | 3.7E-04 | yes | chr2  | exon     | internal exon   | NA  | 0.99 | no  | down | 0.98 | no  | 0.97 | no  | down | 2.6E-02 | yes |
| MSTRG.15938.3 : Tnc : A0A0G2K1L0           | 0     | yes | down | 7.1E-07 | yes | chr5  | intron   | internal intron | NA  | 1.23 | no  | up   | 0.46 | no  | 1.49 | yes | up   | 1.5E-12 | yes |
| MSTRG.18268.5 : Akap8 : Q63014             | 0.08  | yes | down | 2.7E-04 | yes | chr7  | intron   | internal intron | NA  | 0.98 | no  | down | 0.86 | no  | 0.99 | no  | down | 2.8E-01 | no  |
| ENSRNOT00000003748 : Serpinc1 : Q5M7T5     | 11.92 | yes | up   | 5.6E-26 | yes | chr13 | intron   | first intron    | NA  | 0.97 | no  | down | 0.21 | no  | 0.89 | no  | down | 1.2E-15 | yes |
| MSTRG.8665.1 : Kif13a : D3ZM20             | 0     | yes | down | 7.8E-05 | yes | chr17 | intron   | internal intron | NA  | 0.77 | no  | down | 0.81 | no  | 1.00 | no  | up   | 9.5E-01 | no  |
| MSTRG.123.7 : Epb41l2 : D3ZM69             | 0.25  | yes | down | 1.1E-12 | yes | chr1  | intron   | internal intron | NA  | 0.84 | no  | down | 0.55 | no  | 0.91 | no  | down | 8.9E-11 | yes |
| MSTRG.21926.4 : Pls3 : F1LPK7              | 0     | yes | down | 1.5E-04 | yes | chrX  | intron   | internal intron | NA  | 1.96 | no  | up   | 0.07 | no  | 1.11 | no  | up   | 9.8E-14 | yes |
| MSTRG.7830.5 : Dock9 : F1LSM8              | 0.10  | yes | down | 2.7E-05 | yes | chr15 | intron   | internal intron | NA  | 1.01 | no  | up   | 0.97 | no  | 0.97 | no  | down | 2.3E-04 | yes |
| ENSRNOT00000012415 : Prkar2b : P12369      | 0.61  | yes | down | 1.6E-04 | yes | chr6  | intron   | internal intron | NA  | 0.73 | no  | down | 0.51 | no  | 0.71 | yes | down | 2.8E-15 | yes |
| MSTRG.17232.1 : Lamb1 : D3ZQN7             | 3.86  | yes | up   | 8.9E-05 | yes | chr6  | intron   | internal intron | NA  | 1.22 | no  | up   | 0.71 | no  | 1.31 | yes | up   | 5.4E-17 | yes |
| MSTRG.14118.3 : Kmt2c : A0A0G2K426         | 0.22  | yes | down | 1.1E-11 | yes | chr4  | promoter | Distal          | LCP | 0.73 | no  | down | 0.27 | no  | 0.69 | yes | down | 1.4E-11 | yes |
| MSTRG.12153.1 : Trappc10 : F1MAQ4          | 0.63  | yes | down | 1.1E-04 | yes | chr20 | exon     | last exon       | NA  | 0.54 | no  | down | 0.40 | no  | 0.99 | no  | down | 5.9E-01 | no  |
| MSTRG.5942.4 : Ppp1r12b : D3ZIC4           | 2.69  | yes | up   | 3.9E-04 | yes | chr13 | intron   | internal intron | NA  | 0.91 | no  | down | 0.29 | no  | 0.95 | no  | down | 7.9E-06 | yes |
| MSTRG.5509.4 : Pitpm2 : A0A0G2JW50         | 2.70  | yes | up   | 3.9E-04 | yes | chr12 | promoter | Distal          | LCP | 0.46 | yes | down | 0.02 | yes | 0.89 | no  | down | 1.9E-08 | yes |
| MSTRG.19956.5 : Myo1e : A0A0G2K9E8         | 3.15  | yes | up   | 9.4E-05 | yes | chr8  | intron   | first intron    | NA  | 0.37 | yes | down | 0.20 | no  | 0.76 | yes | down | 2.6E-20 | yes |
| MSTRG.6685.1 : Exoc1 : A0A0G2K2V5          | inf   | yes | up   | 6.1E-05 | yes | chr14 | intron   | first intron    | NA  | 1.28 | no  | up   | 0.02 | yes | 0.90 | no  | down | 2.2E-04 | yes |
| ENSRNOT00000023117 : Hydin : D3ZBX6        | 3.95  | yes | up   | 2.0E-07 | yes | chr19 | intron   | internal intron | NA  | 0.54 | no  | down | 0.24 | no  | 0.80 | yes | down | 2.3E-10 | yes |
| ENSRNOT000000091117 : P14ka : A0A140TAJ5   | 7.84  | yes | up   | 1.4E-07 | yes | chr11 | intron   | internal intron | NA  | 3.61 | yes | up   | 0.15 | no  | 0.97 | no  | down | 1.2E-03 | yes |
| MSTRG.22041.3 : Dkc1 : P40615              | 0.28  | yes | down | 2.4E-05 | yes | chrX  | intron   | internal intron | NA  | 0.65 | no  | down | 0.45 | no  | 0.99 | no  | down | 3.6E-01 | no  |
| ENSRNOT00000086335 : Ss18 : Q5XI66         | 6.27  | yes | up   | 1.6E-10 | yes | chr18 | exon     | internal exon   | NA  | 1.13 | no  | up   | 0.03 | yes | 1.04 | no  | up   | 6.9E-02 | no  |
| MSTRG.4508.8 : Dyrk1a : Q63470             | 0.26  | yes | down | 2.2E-05 | yes | chr11 | intron   | internal intron | NA  | 0.54 | no  | down | 0.45 | no  | 1.02 | no  | up   | 1.6E-01 | no  |
| MSTRG.2622.1 : Nt5e2 : D3ZMY7              | 17.59 | yes | up   | 5.0E-22 | yes | chr1  | exon     | last exon       | NA  | 1.01 | no  | up   | 0.93 | no  | 0.92 | no  | down | 2.5E-12 | yes |
| MSTRG.21083.5 : Speg : Q63638              | 0.17  | yes | down | 2.6E-06 | yes | chr9  | intron   | internal intron | NA  | 1.89 | no  | up   | 0.18 | no  | 0.88 | no  | down | 2.3E-07 | yes |
| MSTRG.8278.23 : Rbpms : F2Z3S5             | 0.02  | yes | down | 2.6E-05 | yes | chr16 | promoter | Proximal        | ICP | 1.05 | no  | up   | 0.71 | no  | 1.06 | no  | up   | 4.9E-05 | yes |
| MSTRG.2881.2 : Pkd1 : Q9ERV0               | inf   | yes | up   | 6.6E-05 | yes | chr10 | intron   | internal intron | NA  | 1.27 | no  | up   | 0.60 | no  | 1.19 | no  | up   | 9.8E-07 | yes |
| ENSRNOT00000089068 : Ppp1r12b : D3ZIC4     | 2.69  | yes | up   | 3.9E-04 | yes | chr13 | intron   | internal intron | NA  | 0.82 | no  | down | 0.21 | no  | 0.95 | no  | down | 7.9E-06 | yes |
| MSTRG.19963.1 : Sltn : A0A0G2K904          | 0.34  | yes | down | 6.4E-06 | yes | chr8  | intron   | internal intron | NA  | 1.06 | no  | up   | 0.89 | no  | 0.94 | no  | down | 2.8E-02 | yes |
| MSTRG.19819.4 : Neo1 : P97603              | 0     | yes | down | 3.5E-04 | yes | chr8  | promoter | Intermediate    | LCP | 1.06 | no  | up   | 0.78 | no  | 0.98 | no  | down | 1.8E-02 | yes |
| ENSRNOT00000059565 : Ankrd33b : A0A0G2JZI6 | 0     | yes | down | 3.3E-04 | yes | chr2  | exon     | last exon       | NA  | 1.13 | no  | up   | 0.39 | no  | 1.18 | no  | up   | 2.0E-04 | yes |
| ENSRNOT00000047805 : Asph : A0A096MKE0     | 2.56  | yes | up   | 9.8E-06 | yes | chr5  | intron   | internal intron | NA  | 1.23 | no  | up   | 0.56 | no  | 0.99 | no  | down | 1.3E-01 | yes |
| ENSRNOT00000068682 : Ankrd17 : D4A0B4      | 3.39  | yes | up   | 8.9E-05 | yes | chr14 | intron   | internal intron | NA  | 0.97 | no  | down | 0.39 | no  | 1.11 | no  | up   | 1.6E-06 | yes |
| ENSRNOT00000050792 : Pan2 : R9PXX6         | 2.14  | yes | up   | 4.2E-04 | yes | chr7  | exon     | internal exon   | NA  | 1.16 | no  | up   | 0.03 | yes | 0.84 | no  | down | 1.2E-03 | yes |
| MSTRG.14776.1 : Gefc2 : D4A3Z4             | 0.38  | yes | down | 6.2E-05 | yes | chr4  | intron   | first intron    | NA  | 1.03 | no  | up   | 0.82 | no  | 0.96 | no  | down | 1.9E-01 | no  |
| MSTRG.20748.3 : Prim2 : Q4V8C0             | 4.01  | yes | up   | 2.8E-05 | yes | chr9  | intron   | internal intron | NA  | 1.00 | no  | down | 0.99 | no  | 1.03 | no  | up   | 2.8E-01 | no  |
| MSTRG.15318.2 : Ddx47 : G3V727             | 0.37  | yes | down | 4.0E-04 | yes | chr4  | intron   | internal intron | NA  | 1.05 | no  | up   | 0.77 | no  | 1.05 | no  | up   | 9.1E-04 | yes |
| MSTRG.8713.2 : Sirt5 : Q68FX9              | 6.16  | yes | up   | 1.6E-04 | yes | chr17 | intron   | internal intron | NA  | 1.14 | no  | up   | 0.22 | no  | 1.01 | no  | up   | 5.1E-01 | no  |
| MSTRG.549.4 : Zc3h4 : D3ZVW3               | 2.19  | yes | up   | 2.6E-04 | yes | chr1  | intron   | internal intron | NA  | 0.73 | no  | down | 0.17 | no  | 0.98 | no  | down | 3.2E-01 | no  |
| ENSRNOT00000064323 : Ddx31 : B1H297        | 0.21  | yes | down | 8.0E-05 | yes | chr3  | intron   | first intron    | NA  | 1.25 | no  | up   | 0.13 | no  | 0.95 | no  | down | 4.7E-02 | yes |
| MSTRG.19777.4 : Sin3a : A0A0G2K3H5         | 0.53  | yes | down | 4.1E-06 | yes | chr8  | intron   | last intron     | NA  | 0.39 | yes | down | 0.05 | yes | 0.96 | no  | down | 6.2E-05 | yes |
| ENSRNOT00000089584 : Nfatc4 : A0A0G2K0L1   | 0     | yes | down | 3.3E-04 | yes | chr15 | intron   | internal intron | NA  | 1.11 | no  | up   | 0.67 | no  | 1.13 | no  | up   | 1.3E-11 | yes |
| ENSRNOT00000002727 : Atp6v1a : D4A133      | 0.36  | yes | down | 7.3E-06 | yes | chr11 | intron   | internal intron | NA  | 1.18 | no  | up   | 0.46 | no  | 1.08 | no  | up   | 1.1E-08 | yes |
| MSTRG.10426.4 : Scamp1 : A0A0G2K1I6        | 11.34 | yes | up   | 2.9E-04 | yes | chr2  | intron   | first intron    | NA  | 0.90 | no  | down | 0.50 | no  | 1.05 | no  | up   | 3.2E-06 | yes |
| MSTRG.17811.4 : Mark3 : F1M836             | 0.30  | yes | down | 2.6E-04 | yes | chr6  | exon     | last exon       | NA  | 1.21 | no  | up   | 0.35 | no  | 1.10 | no  | up   | 4.1E-07 | yes |
| MSTRG.3783.2 : Acsf2 : Q499N5              | 0.31  | yes | down | 5.4E-07 | yes | chr10 | intron   | internal intron | NA  | 0.80 | no  | down | 0.10 | no  | 0.87 | no  | down | 2.4E-13 | yes |
|                                            |       |     |      |         |     |       |          |                 |     |      |     |      |      |     |      |     |      |         |     |

|                                           |       |     |      |         |     |       |          |                 |     |      |     |      |      |     |      |     |      |         |     |
|-------------------------------------------|-------|-----|------|---------|-----|-------|----------|-----------------|-----|------|-----|------|------|-----|------|-----|------|---------|-----|
| MSTRG.18072.3 : Dgka : P51556             | 0.72  | yes | down | 1.5E-04 | yes | chr7  | exon     | internal exon   | NA  | 1.64 | no  | up   | 0.22 | no  | 0.95 | no  | down | 8.8E-04 | yes |
| MSTRG.3949.3 : Dhx58 : D3ZD46             | 5.00  | yes | up   | 2.1E-04 | yes | chr10 | exon     | internal exon   | NA  | 0.76 | no  | down | 0.01 | yes | 1.22 | yes | up   | 6.3E-08 | yes |
| MSTRG.19188.2 : Rpap3 : Q68FQ7            | 0.29  | yes | down | 4.9E-05 | yes | chr7  | intron   | internal intron | NA  | 0.99 | no  | down | 0.95 | no  | 1.04 | no  | up   | 2.9E-04 | yes |
| ENSRNOT00000090288 : Tpm1 : A0A0G2JSQ4    | 9.41  | yes | up   | 5.1E-14 | yes | chr8  | intron   | internal intron | NA  | 0.97 | no  | down | 0.82 | no  | 0.81 | yes | down | 2.5E-10 | yes |
| MSTRG.16317.4 : Cap1 : Q08163             | 0.21  | yes | down | 1.6E-07 | yes | chr5  | intron   | internal intron | NA  | 2.23 | yes | up   | 0.00 | yes | 0.94 | no  | down | 1.0E-08 | yes |
| MSTRG.8094.2 : Atp13a1 : B5DEX7           | 3.83  | yes | up   | 1.1E-13 | yes | chr16 | intron   | internal intron | NA  | 2.38 | yes | up   | 0.10 | no  | 1.09 | no  | up   | 4.2E-12 | yes |
| ENSRNOT00000066109 : Aldh3a2 : G3V9W6     | 0.68  | yes | down | 5.9E-04 | yes | chr10 | intron   | internal intron | NA  | 1.02 | no  | up   | 0.95 | no  | 0.89 | no  | down | 4.4E-14 | yes |
| MSTRG.16032.1 : Tek : D3ZCD0              | inf   | yes | up   | 4.6E-07 | yes | chr5  | intron   | internal intron | NA  | 0.80 | no  | down | 0.10 | no  | 0.98 | no  | down | 7.9E-02 | no  |
| MSTRG.16327.12 : Macf1 : A0A0G2K9T4       | 0.36  | yes | down | 1.3E-05 | yes | chr5  | exon     | last exon       | NA  | 1.05 | no  | up   | 0.91 | no  | 0.97 | no  | down | 9.0E-11 | yes |
| ENSRNOT00000003901 : Ddr2 : B1WC09        | 0.49  | yes | down | 3.3E-05 | yes | chr13 | exon     | internal exon   | NA  | 1.18 | no  | up   | 0.35 | no  | 0.95 | no  | down | 3.2E-01 | no  |
| MSTRG.20044.1 : Phip : F1M3B3             | 4.05  | yes | up   | 4.4E-04 | yes | chr8  | intron   | internal intron | NA  | 1.14 | no  | up   | 0.90 | no  | 0.95 | no  | down | 6.3E-02 | no  |
| MSTRG.14384.1 : Atp6v1f : P50408          | 3.83  | yes | up   | 8.5E-07 | yes | chr4  | exon     | last exon       | NA  | 0.87 | no  | down | 0.85 | no  | 1.10 | no  | up   | 1.4E-09 | yes |
| ENSRNOT00000006053 : Sec14l4 : A0A0G2JWI8 | 0.38  | yes | down | 1.3E-04 | yes | chr14 | intron   | internal intron | NA  | 1.29 | no  | up   | 0.31 | no  | 0.91 | no  | down | 1.1E-08 | yes |
| MSTRG.10291.1 : Egnl1 : A0A140TAD9        | 0.32  | yes | down | 1.1E-04 | yes | chr19 | exon     | last exon       | NA  | 0.91 | no  | down | 0.81 | no  | 1.28 | yes | up   | 2.1E-09 | yes |
| MSTRG.20154.1 : Armc8 : B4F7A2            | 0.25  | yes | down | 7.8E-05 | yes | chr8  | exon     | first exon      | NA  | 1.04 | no  | up   | 0.91 | no  | 0.97 | no  | down | 2.3E-03 | yes |
| ENSRNOT00000066137 : Mxra7 : F1M1U0       | inf   | yes | up   | 4.6E-04 | yes | chr10 | intron   | internal intron | NA  | 1.15 | no  | up   | 0.31 | no  | 1.16 | no  | up   | 7.7E-10 | yes |
| ENSRNOT00000015365 : Filip1 : F1LM79      | 4.15  | yes | up   | 2.1E-10 | yes | chr8  | exon     | first exon      | NA  | 0.61 | no  | down | 0.06 | no  | 1.01 | no  | up   | 3.0E-01 | no  |
| ENSRNOT00000009496 : Neo1 : P97603        | 0     | yes | down | 3.5E-04 | yes | chr8  | promoter | Intermediate    | LCP | 1.16 | no  | up   | 0.48 | no  | 0.98 | no  | down | 1.8E-02 | yes |
| MSTRG.15720.3 : Pigo : D3ZTP8             | 0.61  | yes | down | 2.7E-05 | yes | chr5  | exon     | internal exon   | NA  | 1.00 | no  | down | 0.45 | no  | 0.80 | yes | down | 9.0E-03 | yes |
| MSTRG.3981.2 : Becn1 : Q91XJ1             | 0.15  | yes | down | 1.2E-04 | yes | chr10 | exon     | first exon      | NA  | 1.25 | no  | up   | 0.57 | no  | 0.97 | no  | down | 9.2E-02 | no  |
| MSTRG.1783.9 : Tgfb1i1 : Q99PD6           | 3.08  | yes | up   | 7.2E-05 | yes | chr1  | intron   | internal intron | NA  | 0.88 | no  | down | 0.15 | no  | 1.06 | no  | up   | 1.6E-04 | yes |
| MSTRG.16048.2 : Fggg : Q5FVC3             | 18.59 | yes | up   | 3.3E-04 | yes | chr5  | intron   | internal intron | NA  | 1.74 | no  | up   | 0.17 | no  | 0.84 | no  | down | 2.3E-07 | yes |
| MSTRG.8345.4 : Fgfr1 : F1LM54             | 0.22  | yes | down | 3.0E-05 | yes | chr16 | exon     | last exon       | NA  | 0.77 | no  | down | 0.58 | no  | 1.05 | no  | up   | 1.3E-02 | yes |
| MSTRG.6158.4 : Dpt : B2RZ77               | 6.14  | yes | up   | 2.8E-04 | yes | chr13 | exon     | last exon       | NA  | 0.22 | yes | down | 0.45 | no  | 0.85 | no  | down | 3.5E-10 | yes |
| MSTRG.3468.3 : Pafah1b1 : P63004          | 0.19  | yes | down | 5.9E-04 | yes | chr10 | intron   | internal intron | NA  | 0.77 | no  | down | 0.52 | no  | 0.96 | no  | down | 1.4E-04 | yes |
| ENSRNOT00000073948 : Ltn1 : F1M9Q3        | 0.38  | yes | down | 4.2E-04 | yes | chr11 | intron   | internal intron | NA  | 0.88 | no  | down | 0.78 | no  | 1.08 | no  | up   | 1.4E-11 | yes |
| MSTRG.15557.2 : Ints8 : A0A0G2K0V1        | 0.11  | yes | down | 2.1E-05 | yes | chr5  | intron   | last intron     | NA  | 1.03 | no  | up   | 0.50 | no  | 1.07 | no  | up   | 1.6E-05 | yes |
| ENSRNOT00000084725 : Exosc7 : Q5EB65      | 0.07  | yes | down | 4.3E-04 | yes | chr8  | intron   | internal intron | NA  | 0.94 | no  | down | 0.21 | no  | 1.01 | no  | up   | 6.0E-01 | no  |
| ENSRNOT00000057950 : Ctnna3 : B2RYN9      | 0     | yes | down | 1.3E-06 | yes | chr20 | promoter | Distal          | LCP | 1.14 | no  | up   | 0.59 | no  | 1.03 | no  | up   | 1.7E-01 | no  |
| MSTRG.18056.1 : Smarcc2 : D4A510          | 6.20  | yes | up   | 2.1E-04 | yes | chr7  | intron   | last intron     | NA  | 1.01 | no  | up   | 0.99 | no  | 0.96 | no  | down | 6.4E-05 | yes |
| ENSRNOT00000009028 : Sptb : Q6XDA0        | 0.47  | yes | down | 3.3E-04 | yes | chr6  | intron   | internal intron | NA  | 0.97 | no  | down | 0.16 | no  | 0.94 | no  | down | 2.4E-06 | yes |
| MSTRG.18793.1 : Ndr1g1 : Q61E36           | 0.37  | yes | down | 7.6E-09 | yes | chr7  | intron   | internal intron | NA  | 0.57 | no  | down | 0.24 | no  | 0.92 | no  | down | 4.9E-08 | yes |
| ENSRNOT00000009115 : Ubr5 : H9KVE3        | 4.26  | yes | up   | 2.2E-04 | yes | chr7  | intron   | first intron    | NA  | 1.01 | no  | up   | 0.85 | no  | 0.94 | no  | down | 3.0E-02 | yes |
| MSTRG.8717.1 : Mcur1 : D3ZEJ2             | 0.10  | yes | down | 2.2E-05 | yes | chr17 | promoter | Distal          | LCP | 0.57 | no  | down | 0.56 | no  | 0.92 | no  | down | 1.0E-11 | yes |
| MSTRG.8278.8 : Rbpms : F2Z3S5             | 0.02  | yes | down | 2.6E-05 | yes | chr16 | promoter | Proximal        | ICP | 0.96 | no  | down | 0.85 | no  | 1.06 | no  | up   | 4.9E-05 | yes |
| ENSRNOT00000065335 : Trim16 : D3ZW47      | 5.28  | yes | up   | 1.3E-04 | yes | chr10 | exon     | last exon       | NA  | 0.68 | no  | down | 0.47 | no  | 0.88 | no  | down | 3.3E-06 | yes |
| ENSRNOT00000082288 : Myo5a : A0A0G2K9S4   | 1.92  | yes | up   | 1.3E-04 | yes | chr8  | exon     | internal exon   | NA  | 1.00 | no  | down | 0.45 | no  | 1.12 | no  | up   | 2.4E-10 | yes |
| MSTRG.1683.3 : Il4r : Q63257              | 9.80  | yes | up   | 2.9E-08 | yes | chr1  | intron   | internal intron | NA  | 1.93 | no  | up   | 0.33 | no  | 1.11 | no  | up   | 2.1E-05 | yes |
| ENSRNOT00000027526 : Calhm2 : Q5RJQ8      | 0.13  | yes | down | 1.1E-04 | yes | chr1  | intron   | first intron    | NA  | 1.66 | no  | up   | 0.01 | yes | 1.02 | no  | up   | 9.8E-02 | no  |
| MSTRG.16748.4 : Tardbp : I6L9G6           | 2.86  | yes | up   | 4.5E-10 | yes | chr5  | intron   | internal intron | NA  | 0.65 | no  | down | 0.01 | yes | 1.05 | no  | up   | 5.8E-11 | yes |
| MSTRG.12896.3 : Rabgap1 : D3ZX42          | 3.82  | yes | up   | 8.1E-06 | yes | chr3  | intron   | internal intron | NA  | 0.91 | no  | down | 0.40 | no  | 1.01 | no  | up   | 1.9E-01 | no  |
| ENSRNOT00000087906 : Cast : F1LPH1        | 0.36  | yes | down | 1.6E-06 | yes | chr2  | intron   | internal intron | NA  | 0.97 | no  | down | 0.70 | no  | 0.95 | no  | down | 2.4E-10 | yes |
| MSTRG.14603.2 : Tax1bp1 : Q66HA4          | 8.48  | yes | up   | 1.1E-06 | yes | chr4  | exon     | last exon       | NA  | 0.93 | no  | down | 0.92 | no  | 1.04 | no  | up   | 2.0E-04 | yes |
| MSTRG.18183.1 : Abhd17a : Q5XIJ5          | 3.11  | yes | up   | 7.4E-06 | yes | chr7  | exon     | internal exon   | NA  | 1.13 | no  | up   | 0.30 | no  | 0.84 | no  | down | 6.6E-10 | yes |
| ENSRNOT00000040356 : Gtf2i : Q5U2Y1       | 5.31  | yes | up   | 4.9E-06 | yes | chr12 | promoter | Distal          | LCP | 0.90 | no  | down | 0.76 | no  | 0.95 | no  | down | 1.5E-07 | yes |
| ENSRNOT00000084471 : Lmo7 : A0A0G2K174    | 3.35  | yes | up   | 1.2E-04 | yes | chr15 | intron   | internal intron | NA  | 1.00 | no  | down | 0.81 | no  | 0.96 | no  | down | 4.2E-06 | yes |
| ENSRNOT00000081482 : Macf1 : A0A0G2K9T4   | 0.36  | yes | down | 1.3E-05 | yes | chr5  | exon     | last exon       | NA  | 0.97 | no  | down | 0.52 | no  | 0.97 | no  | down | 9.0E-11 | yes |
| MSTRG.3295.1 : Scl1 : B0BNM7              | 0.18  | yes | down | 3.1E-08 | yes | chr10 | promoter | Intermediate    | ICP | 0.80 | no  | down | 0.51 | no  | 1.00 | no  | up   | 8.2E-01 | no  |
| ENSRNOT00000026567 : Lsm4 : D4A2C6        | 0.48  | yes | down | 3.2E-04 | yes | chr16 | exon     | last exon       | NA  | 1.36 | no  | up   | 0.10 | no  | 0.96 | no  | down | 2.1E-01 | no  |
| ENSRNOT00000084420 : Asf1a : A0A0G2JTI3   | 0.41  | yes | down | 1.4E-04 | yes | chr20 | intron   | last intron     | NA  | 1.00 | no  | down | 0.47 | no  | 0.88 | no  | down | 4.8E-08 | yes |
| MSTRG.20561.3 : Rftn1 : G3V712            | 3.70  | yes | up   | 2.3E-04 | yes | chr9  | intron   | internal intron | NA  | 0.68 | no  | down | 0.40 | no  | 1.12 | no  | up   | 1.5E-09 | yes |
| ENSRNOT00000024959 : Mitd1 : Q5I0J5       | 0.26  | yes | down | 9.9E-05 | yes | chr9  | promoter | Intermediate    | LCP | 1.24 | no  | up   | 0.19 | no  | 1.14 | no  | up   | 9.0E-08 | yes |
| MSTRG.9425.2 : Nr3c1 : P06536             | 0.27  | yes | down | 1.2E-04 | yes | chr18 | exon     | first exon      | NA  | 1.11 | no  | up   | 0.85 | no  | 0.91 | no  | down | 1.6E-10 | yes |
| MSTRG.7830.4 : Dock9 : F1LSM8             | 0.10  | yes | down | 2.7E-05 | yes | chr15 | intron   | internal intron | NA  | 0.57 | no  | down | 0.31 | no  | 0.97 | no  | down | 2.3E-04 | yes |
| ENSRNOT00000029255 : Vps8 : D4A5F7        | 7.39  | yes | up   | 3.4E-05 | yes | chr11 | intron   | internal intron | NA  | 0.65 | no  | down | 0.38 | no  | 0.95 | no  | down | 3.2E-03 | yes |
| MSTRG.17299.2 : Heatr5a : F1LSK5          | 0.05  | yes | down | 7.6E-05 | yes | chr6  | intron   | internal intron | NA  | 1.45 | no  | up   | 0.10 | no  | 0.98 | no  | down | 2.4E-01 | no  |
| ENSRNOT00000010895 : Tmem43 : Q5XIP9      | 5.31  | yes | up   | 2.6E-04 | yes | chr4  | exon     | internal exon   | NA  | 1.13 | no  | up   | 0.80 | no  | 0.99 | no  | down | 3.0E-01 | yes |
| MSTRG.8772.1 : Serpinb6b : Q68FX2         | 5.33  | yes | up   | 5.8E-08 | yes | chr17 | promoter | Distal          | LCP | 1.30 | no  | up   | 0.27 | no  | 0.95 | no  | down | 6.3E-06 | yes |
| ENSRNOT00000017832 : Cwc27 : A0A0G2JXR7   | 2.71  | yes | up   | 6.8E-05 | yes | chr2  | intron   | internal intron | NA  | 1.30 | no  | up   | 0.05 | yes | 1.19 | no  | up   | 1.4E-06 | yes |
| ENSRNOT00000019601 : Anln : M0RDG0        | 0.78  | yes | down | 4.3E-04 | yes | chr8  | intron   | internal intron | NA  | 1.15 | no  | up   | 0.10 | no  | 0.97 | no  | down | 9.1E-01 | no  |
| MSTRG.16636.9 : Ubr4 : A0A0G2JU89         | 2.84  | yes | up   | 3.7E-05 | yes | chr5  | intron   | internal intron | NA  | 0.68 | no  | down | 0.63 | no  | 1.02 | no  | up   | 4.6E-05 | yes |
| MSTRG.11379.2 : Txnlp : Q5M7W1            | 6.38  | yes | up   | 4.0E-07 | yes | chr2  | exon     | internal exon   | NA  | 1.00 | no  | down | 1.00 | no  | 0.85 | no  | down | 1.0E-06 | yes |
| ENSRNOT00000001036 : RT1-S3 : Q9R0V1      | 0.16  | yes | down | 4.2E-07 | yes | chr20 | exon     | last exon       | NA  | 0.91 | no  | down | 0.62 | no  | 1.05 | no  | up   | 2.0E-01 | no  |
| MSTRG.12403.1 : Msl3l2 : Q6AYG1           | 0.29  | yes | down | 7.4E-06 | yes | chr20 | exon     | first exon      | NA  | 2.03 | yes | up   | 0.09 | no  | 0.89 | no  | down | 2.3E-05 | yes |
| MSTRG.9649.4 : Hdhd2 : Q6QI86             | 0.20  | yes | down | 5.1E-06 | yes | chr18 | intron   | first intron    | NA  | 0.71 | no  | down | 0.51 | no  | 1.04 | no  | up   | 3.3E-03 | yes |
| MSTRG.4716.5 : Adecy5 : G3V9G1            | 0.16  | yes | down | 2.3E-10 | yes | chr11 | intron   | internal intron | NA  | 0.94 | no  | down | 0.52 | no  | 1.00 | no  | down | 7.6E-01 | no  |
| MSTRG.9752.5 : Coq9 : Q68FT1              | 0.32  | yes | down | 5.1E-11 | yes | chr19 | promoter | Distal          | LCP | 1.01 | no  | up   | 0.92 | no  | 0.93 | no  | down | 1.8E-05 | yes |
| ENSRNOT00000083340 : Cdk5rap2 : F1M4B7    | 0     | yes | down | 1.4E-04 | yes | chr5  | intron   | internal intron | NA  | 0.90 | no  | down | 0.76 | no  | 0.98 | no  | down | 2.6E-01 | no  |
| ENSRNOT00000025415 : Picalm : Q66SY1      | 8.74  | yes | up   | 2.1E-13 | yes | chr1  | intron   | internal intron | NA  | 0.69 | no  | down | 0.22 | no  | 1.13 | no  | up   | 1.1E-06 | yes |
| ENSRNOT00000082592 : Prom1 : Q9JI49       | 8.32  | yes | up   | 2.4E-09 | yes | chr14 | intron   | internal intron | NA  | 1.03 | no  | up   | 0.85 | no  | 0.87 | no  | down | 1.5E-05 | yes |
| ENSRNOT00000066084 : Cox7a2 : P35171      | 0.27  | yes | down | 2.3E-04 | yes | chr8  | promoter | Proximal        | LCP | 0.63 | no  | down | 0.20 | no  | 1.01 | no  | up   | 4.7E-01 | no  |
| MSTRG.8278.2 :                            |       |     |      |         |     |       |          |                 |     |      |     |      |      |     |      |     |      |         |     |

|                                           |       |     |      |         |     |       |          |                 |     |      |     |      |      |     |      |      |      |         |     |
|-------------------------------------------|-------|-----|------|---------|-----|-------|----------|-----------------|-----|------|-----|------|------|-----|------|------|------|---------|-----|
| ENSRNOT00000022017 : Prrc1 : G3V834       | 0.26  | yes | down | 1.1E-04 | yes | chr18 | exon     | first exon      | NA  | 1.22 | no  | up   | 0.16 | no  | 1.12 | no   | up   | 3.2E-14 | yes |
| MSTRG.9268.3 : Lims2 : A0A0G2KAE1         | 0.67  | yes | down | 6.6E-13 | yes | chr18 | intron   | internal intron | NA  | 1.05 | no  | up   | 0.91 | no  | 0.82 | yes  | down | 4.4E-10 | yes |
| MSTRG.3280.1 : Arhgap44 : A0A0H2UHC0      | 7.94  | yes | up   | 4.2E-19 | yes | chr10 | intron   | internal intron | NA  | 1.84 | no  | up   | 0.17 | no  | 1.04 | no   | up   | 6.6E-02 | no  |
| ENSRNOT00000080660 : Hdhd2 : Q6QI86       | 0.20  | yes | down | 5.1E-06 | yes | chr18 | intron   | first intron    | NA  | 1.09 | no  | up   | 0.76 | no  | 1.04 | no   | up   | 3.3E-03 | yes |
| ENSRNOT00000067448 : Insr : FILPL6        | 0.36  | yes | down | 9.6E-05 | yes | chr12 | intron   | internal intron | NA  | 1.05 | no  | up   | 0.09 | no  | 1.09 | no   | up   | 1.4E-04 | yes |
| MSTRG.22038.7 : Fmr1 : Q80WE1             | inf   | yes | up   | 3.0E-04 | yes | chrX  | intron   | internal intron | NA  | 0.77 | no  | down | 0.62 | no  | 1.09 | no   | up   | 7.3E-06 | yes |
| ENSRNOT00000021321 : Ube4a : F1M9N5       | 4.51  | yes | up   | 1.3E-04 | yes | chr8  | intron   | internal intron | NA  | 1.11 | no  | up   | 0.67 | no  | 0.97 | no   | down | 2.4E-03 | yes |
| MSTRG.12896.1 : Rabgap1 : D3ZX42          | 3.82  | yes | up   | 8.1E-06 | yes | chr3  | intron   | internal intron | NA  | 1.01 | no  | up   | 0.98 | no  | 1.01 | no   | up   | 1.9E-01 | no  |
| ENSRNOT00000006835 : Crip1 : P63255       | 8.66  | yes | up   | 6.1E-05 | yes | chr6  | intron   | first intron    | NA  | 4.77 | yes | up   | 0.33 | no  | 1.20 | yes  | up   | 1.6E-08 | yes |
| MSTRG.20878.3 : Gls : P13264              | 0.05  | yes | down | 1.5E-13 | yes | chr9  | intron   | first intron    | NA  | 1.28 | no  | up   | 0.55 | no  | 1.08 | no   | up   | 4.1E-02 | yes |
| ENSRNOT00000092795 : Clasp1 : F1LNR1      | 0.36  | yes | down | 6.7E-07 | yes | chr13 | intron   | internal intron | NA  | 0.98 | no  | down | 0.69 | no  | 1.00 | no   | down | 7.0E-01 | no  |
| ENSRNOT00000071280 : Prdm16 : M0RDL0      | 0.37  | yes | down | 2.7E-04 | yes | chr5  | exon     | internal exon   | NA  | 0.93 | no  | down | 0.60 | no  | 0.83 | yes  | down | 1.1E-06 | yes |
| ENSRNOT00000012247 : Jam3 : Q68FQ2        | 0.30  | yes | down | 4.0E-04 | yes | chr8  | exon     | last exon       | NA  | 1.11 | no  | up   | 0.25 | no  | 0.97 | no   | down | 8.5E-02 | no  |
| ENSRNOT00000066928 : Kcnma1 : A0A0G2K104  | 4.06  | yes | up   | 2.6E-13 | yes | chr15 | intron   | internal intron | NA  | 1.01 | no  | up   | 0.50 | no  | 0.89 | no   | down | 7.4E-06 | yes |
| ENSRNOT00000065127 : Sgpl1 : Q8CHN6       | 0.20  | yes | down | 6.8E-07 | yes | chr20 | intron   | internal intron | NA  | 1.23 | no  | up   | 0.07 | no  | 1.12 | no   | up   | 5.6E-16 | yes |
| ENSRNOT00000041891 : Apoe : P02650        | 0.23  | yes | down | 3.2E-04 | yes | chr1  | exon     | last exon       | NA  | 1.09 | no  | up   | 0.67 | no  | 0.86 | no   | down | 6.2E-12 | yes |
| MSTRG.10830.3 : Phc3 : D3ZS50             | 0.36  | yes | down | 4.0E-04 | yes | chr2  | intron   | internal intron | NA  | 0.55 | no  | down | 0.48 | no  | 0.86 | no   | down | 4.2E-04 | yes |
| ENSRNOT00000015351 : S100a9 : P50116      | 5.80  | yes | up   | 1.2E-04 | yes | chr2  | intron   | first intron    | NA  | 2.43 | yes | up   | 0.05 | yes | 1.60 | yes  | up   | 6.6E-11 | yes |
| ENSRNOT00000020002 : Anepc : G3V7W7       | 0.25  | yes | down | 1.9E-09 | yes | chr1  | intron   | internal intron | NA  | 1.04 | no  | up   | 0.91 | no  | 1.05 | no   | up   | 3.0E-08 | yes |
| MSTRG.4992.10 : Top3b : D4A9Z2            | 11.41 | yes | up   | 1.2E-04 | yes | chr11 | intron   | last intron     | NA  | 1.87 | no  | up   | 0.10 | no  | 0.99 | no   | down | 6.1E-01 | no  |
| ENSRNOT00000068185 : Ybx3 : D4A0L4        | 0.20  | yes | down | 8.8E-05 | yes | chr4  | intron   | internal intron | NA  | 1.00 | no  | down | 0.99 | no  | 1.24 | yes  | up   | 8.2E-11 | yes |
| MSTRG.9610.1 : Rab27b : Q99P74            | 0     | yes | down | 1.4E-04 | yes | chr18 | promoter | Distal          | LCP | 0.82 | no  | down | 0.10 | no  | 1.04 | no   | up   | 7.7E-02 | no  |
| MSTRG.8665.4 : Kif13a : D3ZM20            | 0     | yes | down | 7.8E-05 | yes | chr17 | intron   | internal intron | NA  | 1.29 | no  | up   | 0.48 | no  | 1.00 | no   | up   | 9.5E-01 | no  |
| ENSRNOT00000034983 : Rrp7a : D4AE65       | 1.73  | yes | up   | 1.3E-04 | yes | chr7  | intron   | internal intron | NA  | 0.94 | no  | down | 0.87 | no  | 0.94 | no   | down | 1.5E-02 | yes |
| MSTRG.8877.1 : Hist1h2bd : D3ZWM5         | 0.90  | no  | down | 5.8E-05 | yes | chr17 | promoter | Distal          | LCP | 0.75 | no  | down | 0.28 | no  | 0.74 | yes  | down | 5.5E-11 | yes |
| MSTRG.16938.2 : Lrpprc : F1LM33           | 0.61  | yes | down | 7.5E-05 | yes | chr6  | intron   | internal intron | NA  | 1.00 | no  | down | 0.89 | no  | 0.97 | no   | down | 4.6E-07 | yes |
| MSTRG.1783.10 : Tgfb1l1 : Q99PD6          | 3.08  | yes | up   | 7.2E-05 | yes | chr1  | intron   | internal intron | NA  | 0.36 | yes | down | 0.29 | no  | 1.06 | no   | up   | 1.6E-04 | yes |
| MSTRG.6568.2 : Antxr2 : Q00IM8            | 1.10  | no  | up   | 9.8E-05 | yes | chr14 | intron   | internal intron | NA  | 1.96 | no  | up   | 0.61 | no  | 1.01 | no   | up   | 3.8E-01 | no  |
| MSTRG.15119.1 : Bcl2l13 : D3ZT71          | 0.35  | yes | down | 1.0E-05 | yes | chr4  | exon     | last exon       | NA  | 1.05 | no  | up   | 0.50 | no  | 1.11 | no   | up   | 6.6E-10 | yes |
| ENSRNOT00000060292 : Ptprc : P04157       | 2.98  | yes | up   | 6.9E-14 | yes | chr13 | intron   | internal intron | NA  | 1.44 | no  | up   | 0.50 | no  | 1.12 | no   | up   | 6.1E-15 | yes |
| MSTRG.15276.1 : Chtop11 : M0RDD7          | 0.48  | yes | down | 9.7E-06 | yes | chr4  | exon     | last exon       | NA  | 0.97 | no  | down | 0.33 | no  | 1.25 | yes  | up   | 3.9E-09 | yes |
| ENSRNOT00000085601 : Acaa2 : G3V9U2       | 0.52  | yes | down | 2.2E-04 | yes | chr18 | exon     | last exon       | NA  | 1.01 | no  | up   | 0.07 | no  | 1.00 | no   | up   | 7.4E-01 | no  |
| MSTRG.18214.1 : Arhgap45 : D4AAI2         | 5.87  | yes | up   | 2.5E-04 | yes | chr7  | exon     | internal exon   | NA  | 1.47 | no  | up   | 0.29 | no  | 1.20 | no   | up   | 4.5E-05 | yes |
| MSTRG.11028.2 : Ptx3 : D3ZT94             | 0.07  | yes | down | 2.2E-04 | yes | chr2  | intron   | last intron     | NA  | 1.40 | no  | up   | 0.25 | no  | 1.08 | no   | up   | 3.1E-07 | yes |
| MSTRG.9752.3 : Coq9 : Q68FT1              | 0.32  | yes | down | 5.1E-11 | yes | chr19 | promoter | Distal          | LCP | 1.30 | no  | up   | 0.15 | no  | 0.93 | no   | down | 1.8E-05 | yes |
| MSTRG.8278.39 : Rbpms : F2Z3S5            | 0.02  | yes | down | 2.6E-05 | yes | chr16 | promoter | Proximal        | ICP | 0.72 | no  | down | 0.41 | no  | 1.06 | no   | up   | 4.9E-05 | yes |
| ENSRNOT00000065965 : Mapk10 : A0A0U1RRS7  | 2.61  | yes | up   | 3.6E-06 | yes | chr14 | intron   | first intron    | NA  | 0.99 | no  | down | 0.41 | no  | 0.56 | yes  | down | 6.7E-04 | yes |
| ENSRNOT00000037164 : Nup214 : M0RBV9      | 0.13  | yes | down | 4.7E-04 | yes | chr3  | intron   | internal intron | NA  | 0.89 | no  | down | 0.45 | no  | 1.01 | no   | up   | 5.4E-01 | no  |
| MSTRG.13103.1 : Itga4 : D3ZMQ3            | 0.24  | yes | down | 2.1E-07 | yes | chr3  | intron   | internal intron | NA  | 0.70 | no  | down | 0.24 | no  | 0.99 | no   | down | 7.5E-03 | yes |
| ENSRNOT00000086550 : Plec : F7F9U6        | 0.33  | yes | down | 4.2E-06 | yes | chr7  | exon     | last exon       | NA  | 1.00 | no  | down | 0.70 | no  | 0.90 | no   | down | 2.5E-03 | yes |
| ENSRNOT00000017900 : Ireb2 : Q62751       | 0.22  | yes | down | 5.8E-05 | yes | chr8  | exon     | internal exon   | NA  | 1.14 | no  | up   | 0.51 | no  | 1.28 | yes  | up   | 1.3E-04 | yes |
| MSTRG.5704.4 : RGD1306556 : A0A0G2JZ88    | 0.24  | yes | down | 1.7E-04 | yes | chr12 | exon     | internal exon   | NA  | 1.03 | no  | up   | 0.97 | no  | 1.28 | yes  | up   | 1.1E-07 | yes |
| MSTRG.4508.7 : Dyrk1a : Q63470            | 0.26  | yes | down | 2.2E-05 | yes | chr11 | intron   | internal intron | NA  | 0.50 | yes | down | 0.45 | no  | 1.02 | no   | up   | 1.6E-01 | no  |
| MSTRG.10325.4 : Cast : F1LPH1             | 0.36  | yes | down | 1.6E-06 | yes | chr2  | intron   | internal intron | NA  | 1.04 | no  | up   | 0.60 | no  | 0.95 | no   | down | 2.4E-10 | yes |
| MSTRG.20000.4 : Myo5a : A0A0G2K9S4        | 1.92  | yes | up   | 1.3E-04 | yes | chr8  | exon     | internal exon   | NA  | 0.99 | no  | down | 0.95 | no  | 1.12 | no   | up   | 2.4E-10 | yes |
| MSTRG.4725.2 : Kalrn : P97924             | 1.54  | yes | up   | 9.1E-07 | yes | chr11 | exon     | last exon       | NA  | 1.11 | no  | up   | 0.61 | no  | 1.04 | no   | up   | 1.6E-04 | yes |
| ENSRNOT00000033917 : Fdps : F1LND7        | inf   | yes | up   | 2.2E-05 | yes | chr2  | exon     | last exon       | NA  | 1.04 | no  | up   | 0.69 | no  | 1.07 | no   | up   | 1.2E-03 | yes |
| MSTRG.11263.3 : Atp8b2 : D4A509           | 0.14  | yes | down | 3.1E-04 | yes | chr2  | exon     | first exon      | NA  | 1.35 | no  | up   | 0.60 | no  | 0.92 | no   | down | 5.0E-03 | yes |
| MSTRG.17010.3 : Ttc27 : D3ZTG2            | 0.43  | yes | down | 8.1E-09 | yes | chr6  | exon     | internal exon   | NA  | 1.44 | no  | up   | 0.49 | no  | 1.02 | no   | up   | 1.3E-01 | no  |
| ENSRNOT00000082486 : Thop1 : P24155       | 0.11  | yes | down | 2.2E-07 | yes | chr7  | exon     | last exon       | NA  | 1.02 | no  | up   | 0.77 | no  | 0.92 | no   | down | 9.5E-13 | yes |
| MSTRG.8992.2 : Dip2c : D3ZZB0             | 0.67  | yes | down | 4.5E-04 | yes | chr17 | intron   | internal intron | NA  | 0.38 | yes | down | 0.19 | no  | 0.88 | no   | down | 3.3E-04 | yes |
| MSTRG.1974.3 : Nap114 : Q5U2Z3            | 0.36  | yes | down | 7.2E-05 | yes | chr1  | intron   | internal intron | NA  | 3.62 | yes | up   | 0.21 | no  | 0.98 | no   | down | 3.1E-02 | yes |
| ENSRNOT00000058906 : Tle1 : A0A0G2K324    | 0.11  | yes | down | 4.0E-05 | yes | chr5  | exon     | last exon       | NA  | 0.96 | no  | down | 0.71 | no  | 0.95 | no   | down | 1.3E-05 | yes |
| ENSRNOT00000080694 : Hydin : D3ZBX6       | 3.95  | yes | up   | 2.0E-07 | yes | chr19 | intron   | internal intron | NA  | 0.99 | no  | down | 0.43 | no  | 0.80 | yes  | down | 2.3E-10 | yes |
| ENSRNOT00000084729 : Scamp1 : A0A0G2K1I6  | 11.34 | yes | up   | 2.9E-04 | yes | chr2  | intron   | first intron    | NA  | 1.06 | no  | up   | 0.47 | no  | 1.05 | no   | up   | 3.2E-06 | yes |
| ENSRNOT00000078271 : Sec14l4 : A0A0G2JWI8 | 0.38  | yes | down | 1.3E-04 | yes | chr14 | intron   | internal intron | NA  | 0.70 | no  | down | 0.37 | no  | 0.91 | no   | down | 1.1E-08 | yes |
| ENSRNOT00000006350 : Zeb2 : A0A0G2K8T6    | 0.34  | yes | down | 8.0E-09 | yes | chr3  | intron   | internal intron | NA  | 1.30 | no  | up   | 0.74 | no  | 1.01 | no   | up   | 2.4E-01 | no  |
| ENSRNOT000000078861 : Clu : G3V836        | 0.38  | yes | down | 6.6E-05 | yes | chr15 | intron   | first intron    | NA  | 0.64 | no  | down | 0.16 | no  | 1.26 | yes  | up   | 5.8E-16 | yes |
| MSTRG.16610.2 : Ece1 : Q6IN10             | 0.58  | yes | down | 9.3E-05 | yes | chr5  | intron   | internal intron | NA  | 0.83 | no  | down | 0.23 | no  | 1.14 | no   | up   | 8.3E-15 | yes |
| MSTRG.20817.11 : Map4k4 : A0A0G2K7W4      | 0.36  | yes | down | 7.1E-05 | yes | chr9  | intron   | internal intron | NA  | 0.98 | no  | down | 0.95 | no  | 1.10 | no   | up   | 7.1E-06 | yes |
| MSTRG.4725.13 : Kalrn : P97924            | 1.54  | yes | up   | 9.1E-07 | yes | chr11 | exon     | last exon       | NA  | 0.89 | no  | down | 0.35 | no  | 1.04 | no   | up   | 1.6E-04 | yes |
| MSTRG.1683.12 : Il4r : Q63257             | 9.80  | yes | up   | 2.9E-08 | yes | chr1  | intron   | internal intron | NA  | 0.81 | no  | down | 0.42 | no  | 1.11 | no   | up   | 2.1E-05 | yes |
| ENSRNOT00000071906 : Rpl30l1 : M0RD99     | 4.10  | yes | up   | 1.5E-08 | yes | chr9  | intron   | last intron     | NA  | 1.00 | no  | down | 0.74 | no  | 0.97 | no   | down | 6.7E-01 | no  |
| ENSRNOT00000015620 : Washc2c : F1LPG9     | 0.05  | yes | down | 2.7E-19 | yes | chr4  | exon     | internal exon   | NA  | 1.02 | no  | up   | 0.83 | no  | 1.05 | no   | up   | 2.1E-05 | yes |
| ENSRNOT00000076623 : Smndc1 : Q4QQU6      | inf   | yes | up   | 1.3E-04 | yes | chr1  | promoter | Distal          | LCP | 1.06 | no  | up   | 0.83 | no  | 1.06 | no   | up   | 2.2E-04 | yes |
| MSTRG.19472.1 : Dnm2 : A0A0A0MY48         | 0.11  | yes | down | 8.9E-11 | yes | chr8  | intron   | first intron    | NA  | 1.21 | no  | up   | 0.20 | no  | 1.05 | no   | up   | 2.0E-08 | yes |
| ENSRNOT00000090816 : Rock2 : F1LQT3       | 0.10  | yes | down | 2.0E-24 | yes | chr6  | intron   | internal intron | NA  | 1.62 | no  | up   | 0.54 | no  | 0.97 | no   | down | 1.9E-04 | yes |
| ENSRNOT00000084506 : Clasp1 : F1LNR1      | 0.36  | yes | down | 6.7E-07 | yes | chr13 | intron   | internal intron | NA  | 1.04 | no  | up   | 0.46 | no  | 1.00 | no   | down | 7.0E-01 | no  |
| ENSRNOT00000017592 : Tram2 : F1LUA2       | 3     | yes | up   | 2.1E-05 | yes | chr9  | intron   | first intron    | NA  | 1.62 | no  | up   | 0.11 | no  | 1.02 | no   | up   | 1.2E-01 | no  |
| MSTRG.8552.6 : Ddx46 : Q62780             | 0.56  | yes | down | 3.4E-04 | yes | chr17 | intron   | internal intron | NA  | 1.00 | no  | down | 0.86 | no  | 0.98 | no   | down | 1.3E-01 | no  |
| ENSRNOT00000016563 : Cnot1 : G3V7M0       | 0.08  | yes | down | 2.6E-04 | yes | chr19 | intron   | internal intron | NA  | 0.83 | no  | down | 0.76 | no  | 1.01 | no</ |      |         |     |

|                                         |       |     |      |         |     |       |          |                 |     |      |     |      |      |     |      |     |      |         |     |
|-----------------------------------------|-------|-----|------|---------|-----|-------|----------|-----------------|-----|------|-----|------|------|-----|------|-----|------|---------|-----|
| MSTRG.12646.6 : Rapgef1 : F1M8L9        | inf   | yes | up   | 4.7E-05 | yes | chr3  | intron   | internal intron | NA  | 1.19 | no  | up   | 0.85 | no  | 0.88 | no  | down | 4.1E-04 | yes |
| ENSRNOT00000078285 : Kpna1 : P83953     | 32    | yes | up   | 7.2E-05 | yes | chr11 | promoter | Distal          | LCP | 0.93 | no  | down | 0.35 | no  | 1.11 | no  | up   | 5.7E-08 | yes |
| MSTRG.20352.1 : Ubp1 : D4A030           | 0.44  | yes | down | 2.3E-04 | yes | chr8  | intron   | internal intron | NA  | 0.86 | no  | down | 0.77 | no  | 0.98 | no  | down | 1.9E-01 | no  |
| ENSRNOT00000020886 : Ppp6r3 : D3ZBT9    | 3.21  | yes | up   | 8.1E-07 | yes | chr1  | intron   | internal intron | NA  | 1.00 | no  | down | 0.41 | no  | 0.98 | no  | down | 7.0E-03 | yes |
| MSTRG.17520.3 : Srsf5 : Q09167          | 0.10  | yes | down | 3.0E-09 | yes | chr6  | promoter | Proximal        | ICP | 1.85 | no  | up   | 0.37 | no  | 1.03 | no  | up   | 4.2E-02 | yes |
| MSTRG.8094.5 : Atp13a1 : B5DEX7         | 3.83  | yes | up   | 1.1E-13 | yes | chr16 | intron   | internal intron | NA  | 0.91 | no  | down | 0.81 | no  | 1.09 | no  | up   | 4.2E-12 | yes |
| MSTRG.10871.10 : Dcum1d1 : D3ZRV0       | 1.60  | yes | up   | 3.7E-04 | yes | chr2  | exon     | internal exon   | NA  | 1.01 | no  | up   | 0.21 | no  | 0.97 | no  | down | 2.6E-02 | yes |
| ENSRNOT00000057585 : Fn1 : FILST1       | 0.11  | yes | down | 7.7E-11 | yes | chr9  | intron   | internal intron | NA  | 1.31 | no  | up   | 0.79 | no  | 1.27 | yes | up   | 4.1E-20 | yes |
| MSTRG.14930.4 : Grip2 : A0A0H2UHH8      | 2.18  | yes | up   | 2.2E-05 | yes | chr4  | intron   | internal intron | NA  | 1.06 | no  | up   | 0.48 | no  | 1.01 | no  | up   | 5.2E-01 | no  |
| MSTRG.6746.4 : Pds5a : A4L9P7           | 1.26  | yes | up   | 1.3E-13 | yes | chr14 | exon     | last exon       | NA  | 0.91 | no  | down | 0.46 | no  | 1.01 | no  | up   | 2.7E-01 | no  |
| MSTRG.8351.7 : Adam9 : E9PTA4           | 0.15  | yes | down | 9.7E-05 | yes | chr16 | intron   | internal intron | NA  | 0.60 | no  | down | 0.35 | no  | 1.06 | no  | up   | 3.4E-02 | yes |
| ENSRNOT00000090644 : Fgl1 : A0A0G2KA83  | 5.57  | yes | up   | 1.8E-24 | yes | chr16 | intron   | first intron    | NA  | 1.06 | no  | up   | 0.34 | no  | 1.15 | no  | up   | 6.9E-07 | yes |
| MSTRG.4105.2 : Smurf2 : F1M3F2          | 3.77  | yes | up   | 9.3E-06 | yes | chr10 | intron   | internal intron | NA  | 1.06 | no  | up   | 0.49 | no  | 1.03 | no  | up   | 6.3E-02 | no  |
| ENSRNOT00000088885 : Hint3 : A0A0G2K7W8 | 0.41  | yes | down | 1.7E-04 | yes | chr1  | intron   | internal intron | NA  | 1.06 | no  | up   | 0.43 | no  | 1.02 | no  | up   | 2.1E-01 | no  |
| MSTRG.14930.7 : Grip2 : A0A0H2UHH8      | 2.18  | yes | up   | 2.2E-05 | yes | chr4  | intron   | internal intron | NA  | 0.81 | no  | down | 0.34 | no  | 1.01 | no  | up   | 5.2E-01 | no  |
| MSTRG.11953.30 : RT1-CE7 : D3ZLE6       | inf   | yes | up   | 7.3E-07 | yes | chr20 | exon     | internal exon   | NA  | 1.03 | no  | up   | 0.84 | no  | 1.22 | yes | up   | 7.3E-16 | yes |
| MSTRG.8345.12 : Fgfr1 : FILM54          | 0.22  | yes | down | 3.0E-05 | yes | chr16 | exon     | last exon       | NA  | 1.83 | no  | up   | 0.48 | no  | 1.05 | no  | up   | 1.3E-02 | yes |
| ENSRNOT00000013933 : Map2k1 : Q01986    | 3.88  | yes | up   | 3.2E-04 | yes | chr8  | exon     | last exon       | NA  | 1.15 | no  | up   | 0.24 | no  | 1.06 | no  | up   | 2.7E-09 | yes |
| ENSRNOT00000003837 : Cdc42bpa : G3V6C9  | 8.92  | yes | up   | 2.1E-05 | yes | chr13 | intron   | internal intron | NA  | 0.68 | no  | down | 0.49 | no  | 0.97 | no  | down | 2.5E-04 | yes |
| ENSRNOT00000021925 : Ptdss2 : B2GV22    | 0.17  | yes | down | 6.9E-07 | yes | chr1  | intron   | internal intron | NA  | 1.10 | no  | up   | 0.83 | no  | 0.94 | no  | down | 7.1E-04 | yes |
| MSTRG.4751.1 : Pcytl1a : P19836         | 0.29  | yes | down | 1.2E-05 | yes | chr11 | exon     | first exon      | NA  | 0.82 | no  | down | 0.25 | no  | 0.94 | no  | down | 3.3E-07 | yes |
| MSTRG.10716.2 : Trio : F1MOZ1           | 0.35  | yes | down | 1.6E-06 | yes | chr2  | exon     | first exon      | NA  | 1.14 | no  | up   | 0.90 | no  | 1.02 | no  | up   | 2.1E-02 | yes |
| ENSRNOT00000046262 : Nfl : FILM28       | 2.12  | yes | up   | 4.3E-05 | yes | chr10 | intron   | internal intron | NA  | 1.02 | no  | up   | 0.73 | no  | 0.98 | no  | down | 1.9E-01 | no  |
| ENSRNOT00000068633 : Aox1 : F1LRQ1      | 0.36  | yes | down | 1.5E-07 | yes | chr9  | intron   | internal intron | NA  | 1.13 | no  | up   | 0.80 | no  | 0.73 | yes | down | 3.5E-17 | yes |
| ENSRNOT00000087061 : Bax : Q9JKL3       | 8.53  | yes | up   | 7.6E-07 | yes | chr1  | promoter | Distal          | LCP | 1.16 | no  | up   | 0.42 | no  | 1.07 | no  | up   | 5.8E-08 | yes |
| MSTRG.21205.2 : Ube2f : Q5U203          | 7.18  | yes | up   | 7.2E-05 | yes | chr9  | intron   | internal intron | NA  | 0.98 | no  | down | 0.47 | no  | 1.01 | no  | up   | 5.6E-01 | no  |
| MSTRG.10517.2 : Erbin : M0R9T2          | 3.86  | yes | up   | 2.1E-05 | yes | chr2  | intron   | last intron     | NA  | 0.94 | no  | down | 0.68 | no  | 0.94 | no  | down | 3.9E-05 | yes |
| MSTRG.6713.7 : Fryl : D3ZQY4            | 2.76  | yes | up   | 1.7E-04 | yes | chr14 | intron   | internal intron | NA  | 1.34 | no  | up   | 0.47 | no  | 1.00 | no  | down | 4.6E-01 | no  |
| ENSRNOT00000005100 : Slc43a2 : D3ZDC2   | 17.66 | yes | up   | 2.2E-19 | yes | chr10 | intron   | internal intron | NA  | 0.95 | no  | down | 0.91 | no  | 1.39 | yes | up   | 5.1E-08 | yes |
| ENSRNOT00000054699 : Cnnm2 : Q5U2P1     | 1.24  | yes | up   | 9.1E-07 | yes | chr1  | intron   | first intron    | NA  | 1.39 | no  | up   | 0.34 | no  | 1.05 | no  | up   | 1.5E-03 | yes |
| MSTRG.19189.1 : Rpap3 : Q68FQ7          | 0.29  | yes | down | 4.9E-05 | yes | chr7  | intron   | internal intron | NA  | 0.92 | no  | down | 0.65 | no  | 1.04 | no  | up   | 2.9E-04 | yes |
| ENSRNOT00000011552 : Tbx3 : A0A0G2K8D7  | 2.83  | yes | up   | 2.0E-10 | yes | chr12 | intron   | internal intron | NA  | 0.90 | no  | down | 0.85 | no  | 0.99 | no  | down | 7.3E-01 | no  |
| ENSRNOT00000023854 : Sf3b3 : E9PT66     | 0.34  | yes | down | 3.6E-04 | yes | chr19 | exon     | last exon       | NA  | 1.09 | no  | up   | 0.71 | no  | 0.97 | no  | down | 3.1E-07 | yes |
| MSTRG.19928.5 : Herc1 : A0A0G2JTT6      | 10.78 | yes | up   | 2.7E-04 | yes | chr8  | intron   | internal intron | NA  | 2.25 | yes | up   | 0.28 | no  | 1.04 | no  | up   | 5.4E-02 | no  |
| MSTRG.9889.5 : Nfix : F2Z3R4            | 0.58  | yes | down | 1.9E-06 | yes | chr19 | intron   | internal intron | NA  | 0.63 | no  | down | 0.50 | no  | 0.77 | yes | down | 2.4E-14 | yes |
| ENSRNOT00000028646 : Rasgrp2 : P0C643   | 0.26  | yes | down | 2.6E-04 | yes | chr1  | exon     | internal exon   | NA  | 1.33 | no  | up   | 0.31 | no  | 1.04 | no  | up   | 7.0E-02 | no  |
| MSTRG.11953.34 : RT1-CE7 : D3ZLE6       | inf   | yes | up   | 7.3E-07 | yes | chr20 | exon     | internal exon   | NA  | 1.02 | no  | up   | 0.91 | no  | 1.22 | yes | up   | 7.3E-16 | yes |
| MSTRG.3861.1 : Kpnb1 : F2Z3Q8           | 17.89 | yes | up   | 1.8E-04 | yes | chr10 | intron   | internal intron | NA  | 0.62 | no  | down | 0.47 | no  | 0.97 | no  | down | 1.9E-07 | yes |
| ENSRNOT00000014709 : Cast : FILPH1      | 0.36  | yes | down | 1.6E-06 | yes | chr2  | intron   | internal intron | NA  | 0.99 | no  | down | 0.50 | no  | 0.95 | no  | down | 2.4E-10 | yes |
| MSTRG.13130.2 : Calcr1 : Q63118         | 2.81  | yes | up   | 1.2E-04 | yes | chr3  | intron   | internal intron | NA  | 0.56 | no  | down | 0.50 | no  | 1.09 | no  | up   | 1.2E-04 | yes |
| ENSRNOT00000087439 : Rbms1 : A0A0G2K4R7 | 0     | yes | down | 3.3E-05 | yes | chr3  | intron   | internal intron | NA  | 1.01 | no  | up   | 0.48 | no  | 0.97 | no  | down | 1.2E-01 | no  |
| ENSRNOT00000090727 : Lmo7 : A0A0G2K174  | 3.35  | yes | up   | 1.2E-04 | yes | chr15 | intron   | internal intron | NA  | 2.54 | yes | up   | 0.00 | yes | 0.96 | no  | down | 4.2E-06 | yes |
| ENSRNOT00000086226 : Kif1b : A0A0G2KA12 | 3.65  | yes | up   | 7.4E-05 | yes | chr5  | intron   | internal intron | NA  | 0.86 | no  | down | 0.77 | no  | 1.05 | no  | up   | 6.5E-02 | no  |
| MSTRG.2057.1 : Sptbn2 : F1MA36          | 0.33  | yes | down | 1.2E-08 | yes | chr1  | intron   | internal intron | NA  | 0.92 | no  | down | 0.04 | yes | 0.96 | no  | down | 3.4E-01 | no  |
| ENSRNOT00000066546 : Flnb : D4A8D5      | 1.70  | yes | up   | 8.8E-05 | yes | chr15 | intron   | last intron     | NA  | 0.61 | no  | down | 0.02 | yes | 1.00 | no  | up   | 2.4E-01 | no  |
| ENSRNOT00000076460 : Parp4 : A0A096MJR6 | 1.23  | yes | up   | 1.1E-06 | yes | chr15 | intron   | last intron     | NA  | 0.92 | no  | down | 0.11 | no  | 0.95 | no  | down | 6.6E-05 | yes |
| ENSRNOT00000092452 : Upf2 : D3ZT03      | 0.21  | yes | down | 9.8E-07 | yes | chr17 | intron   | internal intron | NA  | 1.09 | no  | up   | 0.56 | no  | 1.03 | no  | up   | 3.0E-03 | yes |
| MSTRG.14960.5 : Eogt : Q5NDL0           | 6.71  | yes | up   | 1.7E-04 | yes | chr4  | intron   | internal intron | NA  | 2.18 | yes | up   | 0.10 | no  | 1.10 | no  | up   | 2.0E-05 | yes |
| MSTRG.4508.3 : Dyrk1a : Q63470          | 0.26  | yes | down | 2.2E-05 | yes | chr11 | intron   | internal intron | NA  | 0.77 | no  | down | 0.79 | no  | 1.02 | no  | up   | 1.6E-01 | no  |
| MSTRG.8434.1 : Lamp1 : P14562           | 0.27  | yes | down | 5.9E-08 | yes | chr16 | promoter | Distal          | LCP | 1.16 | no  | up   | 0.62 | no  | 1.10 | no  | up   | 5.4E-06 | yes |
| ENSRNOT00000048044 : Tpm1 : Q923Z2      | 9.41  | yes | up   | 5.1E-14 | yes | chr8  | intron   | internal intron | NA  | 0.70 | no  | down | 0.01 | yes | 0.75 | yes | down | 6.0E-18 | yes |
| MSTRG.20157.4 : Dzip11 : Q5XIA0         | 0.67  | yes | down | 4.1E-05 | yes | chr8  | intron   | internal intron | NA  | 0.63 | no  | down | 0.15 | no  | 1.09 | no  | up   | 1.8E-03 | yes |
| MSTRG.1443.4 : Arap1 : FILM60           | 2.71  | yes | up   | 3.3E-04 | yes | chr1  | intron   | first intron    | NA  | 1.23 | no  | up   | 0.33 | no  | 0.99 | no  | down | 2.5E-02 | yes |
| MSTRG.21039.15 : Tns1 : FILN42          | 0.09  | yes | down | 2.0E-04 | yes | chr9  | intron   | last intron     | NA  | 1.46 | no  | up   | 0.38 | no  | 0.86 | no  | down | 7.8E-19 | yes |
| ENSRNOT00000093334 : Eftud2 : FILM66    | 4.66  | yes | up   | 6.0E-04 | yes | chr10 | exon     | internal exon   | NA  | 1.31 | no  | up   | 0.14 | no  | 1.02 | no  | up   | 4.9E-02 | yes |
| MSTRG.19219.2 : Fkbp11 : G3V7V5         | inf   | yes | up   | 4.7E-06 | yes | chr7  | intron   | internal intron | NA  | 0.94 | no  | down | 0.90 | no  | 1.06 | no  | up   | 1.6E-07 | yes |
| MSTRG.4992.6 : Top3b : D4A9Z2           | 11.41 | yes | up   | 1.2E-04 | yes | chr11 | intron   | last intron     | NA  | 0.52 | no  | down | 0.03 | yes | 0.99 | no  | down | 6.1E-01 | no  |
| MSTRG.19735.4 : Atm : A0A0G2K310        | 0.65  | yes | down | 2.4E-04 | yes | chr8  | intron   | internal intron | NA  | 0.28 | yes | down | 0.20 | no  | 1.01 | no  | up   | 4.6E-01 | no  |
| MSTRG.6746.3 : Pds5a : A4L9P7           | 1.26  | yes | up   | 1.3E-13 | yes | chr14 | exon     | last exon       | NA  | 0.75 | no  | down | 0.47 | no  | 1.01 | no  | up   | 2.7E-01 | no  |
| MSTRG.12922.2 : Zeb2 : A0A0G2K8T6       | 0.34  | yes | down | 8.0E-09 | yes | chr3  | intron   | internal intron | NA  | 0.71 | no  | down | 0.59 | no  | 1.01 | no  | up   | 2.4E-01 | no  |
| ENSRNOT00000041915 : Hacd3 : D4ABI7     | 0.11  | yes | down | 1.7E-06 | yes | chr8  | intron   | internal intron | NA  | 2.02 | yes | up   | 0.55 | no  | 1.02 | no  | up   | 6.2E-05 | yes |
| ENSRNOT00000023890 : Nedd4l : F1LRN8    | 2.03  | yes | up   | 3.6E-05 | yes | chr18 | intron   | internal intron | NA  | 1.01 | no  | up   | 0.09 | no  | 0.95 | no  | down | 3.9E-02 | yes |
| MSTRG.11268.3 : Tpm3 : Q63610           | 0.37  | yes | down | 8.0E-05 | yes | chr2  | intron   | internal intron | NA  | 0.97 | no  | down | 0.91 | no  | 1.11 | no  | up   | 3.2E-12 | yes |
| MSTRG.10153.4 : Cmp1 : A0A0G2JYB9       | 0.58  | yes | down | 9.9E-05 | yes | chr19 | intron   | internal intron | NA  | 0.40 | yes | down | 0.35 | no  | 0.89 | no  | down | 2.1E-04 | yes |
| MSTRG.11187.1 : Sema4a : A0A1B0GWV9     | 3.09  | yes | up   | 1.9E-04 | yes | chr2  | promoter | Intermediate    | LCP | 0.93 | no  | down | 0.44 | no  | 1.07 | no  | up   | 2.4E-05 | yes |
| MSTRG.12584.2 : Pmpca : Q68FX8          | 0.39  | yes | down | 1.4E-04 | yes | chr3  | intron   | internal intron | NA  | 0.77 | no  | down | 0.35 | no  | 1.03 | no  | up   | 5.9E-03 | yes |
| MSTRG.20501.1 : Trip10 : P97531         | 2.19  | yes | up   | 4.1E-04 | yes | chr9  | intron   | last intron     | NA  | 1.00 | no  | down | 0.99 | no  | 0.91 | no  | down | 4.8E-08 | yes |
| MSTRG.5410.5 : Gtf2i : Q5U2Y1           | 5.31  | yes | up   | 4.9E-06 | yes | chr12 | promoter | Distal          | LCP | 0.90 | no  | down | 0.72 | no  | 0.95 | no  | down | 1.5E-07 | yes |
| ENSRNOT00000008150 : Ncstn : Q8CGU6     | 0.30  | yes | down | 6.8E-05 | yes | chr13 | intron   | first intron    | NA  | 1.05 | no  | up   | 0.67 | no  | 1.02 | no  | up   | 4.0E-02 | yes |
| MSTRG.5906.6 : Atp2b4 : Q64542          | 2.31  | yes | up   | 1.3E-05 | yes | chr13 | intron   | internal intron | NA  | 1.12 | no  | up   | 0.52 | no  | 0.68 | yes | down | 2.6E-19 | yes |
| MSTRG.256.1 : Syne1 : Q8VHJ9            | 0.04  | yes | down | 1.5E-19 | yes | chr1  | exon     | first exon      | NA  | 1.32 | no  | up   | 0.77 | no  | 0.89 | no  | down | 8.9E-14 | yes |
| MSTRG.1                                 |       |     |      |         |     |       |          |                 |     |      |     |      |      |     |      |     |      |         |     |

|                                         |       |     |      |         |     |       |          |                 |     |      |     |      |      |     |      |     |      |         |     |
|-----------------------------------------|-------|-----|------|---------|-----|-------|----------|-----------------|-----|------|-----|------|------|-----|------|-----|------|---------|-----|
| MSTRG.659.1 : Cic : D4A853              | 4.32  | yes | up   | 3.8E-07 | yes | chr1  | exon     | internal exon   | NA  | 1.13 | no  | up   | 0.59 | no  | 1.06 | no  | up   | 4.3E-02 | yes |
| MSTRG.19928.4 : Herc1 : A0A0G2JTT6      | 10.78 | yes | up   | 2.7E-04 | yes | chr8  | intron   | internal intron | NA  | 0.71 | no  | down | 0.38 | no  | 1.04 | no  | up   | 5.4E-02 | no  |
| MSTRG.18971.2 : Triobp : A2TIS7         | 0.29  | yes | down | 2.0E-06 | yes | chr7  | intron   | internal intron | NA  | 1.23 | no  | up   | 0.06 | no  | 0.97 | no  | down | 5.1E-06 | yes |
| MSTRG.18451.1 : Atp2b1 : P11505         | 4.09  | yes | up   | 4.6E-11 | yes | chr7  | exon     | last exon       | NA  | 2.12 | yes | up   | 0.26 | no  | 1.04 | no  | up   | 4.5E-06 | yes |
| ENSRNOT00000093370 : Mycbp2 : D4A2D3    | 0.31  | yes | down | 9.2E-06 | yes | chr15 | intron   | internal intron | NA  | 0.94 | no  | down | 0.81 | no  | 1.00 | no  | up   | 6.8E-01 | no  |
| MSTRG.20752.3 : Ptpn18 : Q4KM54         | 0     | yes | down | 1.9E-04 | yes | chr9  | intron   | first intron    | NA  | 0.98 | no  | down | 0.94 | no  | 1.20 | no  | up   | 1.2E-08 | yes |
| MSTRG.1683.9 : Il4r : Q63257            | 9.80  | yes | up   | 2.9E-08 | yes | chr1  | intron   | internal intron | NA  | 0.50 | yes | down | 0.18 | no  | 1.11 | no  | up   | 2.1E-05 | yes |
| MSTRG.21023.3 : Fn1 : F1LST1            | 0.11  | yes | down | 7.7E-11 | yes | chr9  | intron   | internal intron | NA  | 1.42 | no  | up   | 0.73 | no  | 1.27 | yes | up   | 4.1E-20 | yes |
| MSTRG.22041.2 : Dkc1 : P40615           | 0.28  | yes | down | 2.4E-05 | yes | chrX  | intron   | internal intron | NA  | 1.21 | no  | up   | 0.60 | no  | 0.99 | no  | down | 3.6E-01 | no  |
| ENSRNOT00000088416 : Gsta3 : P04904     | 2.74  | yes | up   | 2.3E-04 | yes | chr9  | exon     | last exon       | NA  | 0.76 | no  | down | 0.31 | no  | 0.64 | yes | down | 2.9E-15 | yes |
| ENSRNOT00000006946 : GnpTAB : D3ZKE0    | 0.07  | yes | down | 6.5E-07 | yes | chr7  | intron   | first intron    | NA  | 1.09 | no  | up   | 0.35 | no  | 0.80 | yes | down | 3.3E-05 | yes |
| MSTRG.19735.2 : Atm : A0A0G2K3I0        | 0.65  | yes | down | 2.4E-04 | yes | chr8  | intron   | internal intron | NA  | 1.62 | no  | up   | 0.47 | no  | 1.01 | no  | up   | 4.6E-01 | no  |
| ENSRNOT00000001182 : AutS2 : F1M388     | 0.04  | yes | down | 4.8E-14 | yes | chr12 | intron   | internal intron | NA  | 1.02 | no  | up   | 0.70 | no  | 1.01 | no  | up   | 5.6E-01 | no  |
| MSTRG.13766.3 : Ncoa6 : G3V8C9          | 7.63  | yes | up   | 1.0E-10 | yes | chr3  | exon     | internal exon   | NA  | 0.52 | no  | down | 0.46 | no  | 1.03 | no  | up   | 4.4E-03 | yes |
| ENSRNOT00000020573 : Kmt2a : F1M0L3     | 0.53  | yes | down | 1.7E-05 | yes | chr8  | exon     | internal exon   | NA  | 1.08 | no  | up   | 0.71 | no  | 0.99 | no  | down | 9.3E-01 | no  |
| MSTRG.4262.1 : Afmid : M0RC77           | 4.72  | yes | up   | 9.0E-06 | yes | chr10 | promoter | Intermediate    | LCP | 0.96 | no  | down | 0.87 | no  | 0.81 | yes | down | 7.4E-05 | yes |
| MSTRG.11265.6 : Ubap2l : E9PTR4         | 6.62  | yes | up   | 4.0E-04 | yes | chr2  | intron   | internal intron | NA  | 1.33 | no  | up   | 0.10 | no  | 1.13 | no  | up   | 3.8E-12 | yes |
| MSTRG.5906.7 : Atp2b4 : Q64542          | 2.31  | yes | up   | 1.3E-05 | yes | chr13 | intron   | internal intron | NA  | 0.92 | no  | down | 0.26 | no  | 0.68 | yes | down | 2.6E-19 | yes |
| ENSRNOT0000007164 : Hmox2 : P23711      | inf   | yes | up   | 5.3E-04 | yes | chr10 | exon     | last exon       | NA  | 0.95 | no  | down | 0.48 | no  | 1.09 | no  | up   | 4.1E-06 | yes |
| MSTRG.12626.2 : Col5a1 : G3V763         | 0.33  | yes | down | 4.5E-04 | yes | chr3  | intron   | internal intron | NA  | 0.83 | no  | down | 0.80 | no  | 1.08 | no  | up   | 2.2E-06 | yes |
| MSTRG.18072.1 : Dgka : P51556           | 0.72  | yes | down | 1.5E-04 | yes | chr7  | exon     | internal exon   | NA  | 1.44 | no  | up   | 0.33 | no  | 0.95 | no  | down | 8.8E-04 | yes |
| MSTRG.16640.2 : Arhgef10l : M0R7W2      | 2.87  | yes | up   | 9.9E-07 | yes | chr5  | intron   | internal intron | NA  | 1.00 | no  | down | 0.98 | no  | 1.13 | no  | up   | 8.4E-04 | yes |
| ENSRNOT00000020558 : Ugg1 : Q9JLA3      | 0.22  | yes | down | 3.9E-04 | yes | chr9  | intron   | internal intron | NA  | 1.12 | no  | up   | 0.93 | no  | 1.11 | no  | up   | 9.8E-15 | yes |
| MSTRG.12945.1 : Fmnl2 : A0A0G2K132      | 0.84  | no  | down | 6.1E-07 | yes | chr3  | intron   | internal intron | NA  | 0.75 | no  | down | 0.40 | no  | 1.00 | no  | down | 9.6E-01 | no  |
| MSTRG.1443.9 : Arap1 : F1LM60           | 2.71  | yes | up   | 3.3E-04 | yes | chr1  | intron   | first intron    | NA  | 1.37 | no  | up   | 0.28 | no  | 0.99 | no  | down | 2.5E-02 | yes |
| ENSRNOT000000081437 : Filip1 : F1LM79   | 4.15  | yes | up   | 2.1E-10 | yes | chr8  | exon     | first exon      | NA  | 0.76 | no  | down | 0.02 | yes | 1.01 | no  | up   | 3.0E-01 | no  |
| MSTRG.12240.11 : Bicc1 : A0A0G2K0Y0     | 5.19  | yes | up   | 5.0E-04 | yes | chr20 | intron   | internal intron | NA  | 0.90 | no  | down | 0.67 | no  | 1.52 | yes | up   | 1.2E-05 | yes |
| MSTRG.19070.2 : Rrp7a : D4AE65          | 1.73  | yes | up   | 1.3E-04 | yes | chr7  | intron   | internal intron | NA  | 0.83 | no  | down | 0.52 | no  | 0.94 | no  | down | 1.5E-02 | yes |
| MSTRG.4525.3 : Mx1 : Q499S4             | 3.65  | yes | up   | 1.1E-13 | yes | chr11 | intron   | internal intron | NA  | 4.84 | yes | up   | 0.18 | no  | 1.36 | yes | up   | 1.2E-13 | yes |
| MSTRG.8278.4 : Rbpms : F2Z3S5           | 0.02  | yes | down | 2.6E-05 | yes | chr16 | promoter | Proximal        | ICP | 1.07 | no  | up   | 0.74 | no  | 1.06 | no  | up   | 4.9E-05 | yes |
| MSTRG.1035.1 : Rasip1 : B5DF05          | 6.95  | yes | up   | 1.3E-05 | yes | chr1  | intron   | first intron    | NA  | 0.63 | no  | down | 0.23 | no  | 0.96 | no  | down | 1.3E-02 | yes |
| MSTRG.15557.1 : IntS8 : A0A0G2K0V1      | 0.11  | yes | down | 2.1E-05 | yes | chr5  | intron   | last intron     | NA  | 1.05 | no  | up   | 0.89 | no  | 1.07 | no  | up   | 1.6E-05 | yes |
| MSTRG.8345.9 : Fgfr1 : F1LM54           | 0.22  | yes | down | 3.0E-05 | yes | chr16 | exon     | last exon       | NA  | 1.11 | no  | up   | 0.88 | no  | 1.05 | no  | up   | 1.3E-02 | yes |
| ENSRNOT00000005722 : Deptor : F1M8Y4    | 2.15  | yes | up   | 9.9E-15 | yes | chr7  | intron   | internal intron | NA  | 0.79 | no  | down | 0.45 | no  | 0.97 | no  | down | 2.0E-01 | no  |
| MSTRG.20817.9 : Map4k4 : A0A0G2K7W4     | 0.36  | yes | down | 7.1E-05 | yes | chr9  | intron   | internal intron | NA  | 0.72 | no  | down | 0.22 | no  | 1.10 | no  | up   | 7.1E-06 | yes |
| ENSRNOT00000027414 : Tie1 : B5DFD6      | 1.35  | yes | up   | 2.1E-04 | yes | chr5  | intron   | first intron    | NA  | 2.40 | yes | up   | 0.52 | no  | 0.76 | yes | down | 4.3E-08 | yes |
| MSTRG.1443.3 : Arap1 : F1LM60           | 2.71  | yes | up   | 3.3E-04 | yes | chr1  | intron   | first intron    | NA  | 1.07 | no  | up   | 0.80 | no  | 0.99 | no  | down | 2.5E-02 | yes |
| ENSRNOT000000090751 : Akap9 : F1LPB4    | 2.74  | yes | up   | 2.9E-04 | yes | chr4  | intron   | internal intron | NA  | 1.00 | no  | down | 0.82 | no  | 1.05 | no  | up   | 2.3E-05 | yes |
| MSTRG.20963.1 : Nbeal1 : F1M6V0         | 4.79  | yes | up   | 6.8E-08 | yes | chr9  | intron   | internal intron | NA  | 1.18 | no  | up   | 0.59 | no  | 1.00 | no  | up   | 5.1E-01 | no  |
| ENSRNOT00000093684 : Nup214 : D4ACK1    | 0.13  | yes | down | 4.7E-04 | yes | chr3  | intron   | internal intron | NA  | 1.05 | no  | up   | 0.50 | no  | 0.99 | no  | down | 6.9E-01 | no  |
| ENSRNOT00000004787 : Utp3 : Q6AXX4      | 0.25  | yes | down | 1.4E-04 | yes | chr14 | exon     | first exon      | NA  | 4.23 | yes | up   | 0.09 | no  | 1.02 | no  | up   | 3.8E-01 | no  |
| ENSRNOT00000093420 : Nr2f1 : A0A1W2Q6N8 | 1.84  | yes | up   | 2.6E-07 | yes | chr2  | intron   | last intron     | NA  | 1.01 | no  | up   | 0.48 | no  | 1.00 | no  | up   | 7.8E-01 | no  |
| MSTRG.8772.3 : Serpinb6b : Q68FX2       | 5.33  | yes | up   | 5.8E-08 | yes | chr17 | promoter | Distal          | LCP | 1.27 | no  | up   | 0.48 | no  | 0.95 | no  | down | 6.3E-06 | yes |
| MSTRG.8948.4 : Mtpap : D3ZPN5           | 1.99  | yes | up   | 1.4E-05 | yes | chr17 | intron   | internal intron | NA  | 1.04 | no  | up   | 0.88 | no  | 1.03 | no  | up   | 1.2E-01 | no  |
| ENSRNOT000000092387 : Tsr1 : D3ZEM8     | 45.59 | yes | up   | 3.4E-04 | yes | chr10 | intron   | internal intron | NA  | 1.00 | no  | down | 0.98 | no  | 1.00 | no  | down | 9.7E-01 | no  |
| ENSRNOT00000080988 : Aldoa : P05065     | 0.17  | yes | down | 1.4E-04 | yes | chr1  | exon     | last exon       | NA  | 0.92 | no  | down | 0.77 | no  | 0.98 | no  | down | 4.2E-08 | yes |
| MSTRG.17811.1 : Mark3 : F1M836          | 0.30  | yes | down | 2.6E-04 | yes | chr6  | exon     | last exon       | NA  | 1.03 | no  | up   | 0.94 | no  | 1.10 | no  | up   | 4.1E-07 | yes |
| MSTRG.19220.14 : Kmt2d : A0A0G2JVD6     | 6.53  | yes | up   | 2.1E-09 | yes | chr7  | exon     | last exon       | NA  | 1.07 | no  | up   | 0.70 | no  | 1.03 | no  | up   | 3.5E-02 | yes |
| ENSRNOT00000017453 : Postn : A0A097BW25 | 0.29  | yes | down | 1.4E-05 | yes | chr2  | intron   | internal intron | NA  | 4.85 | yes | up   | 0.11 | no  | 1.23 | yes | up   | 1.4E-16 | yes |
| MSTRG.12934.2 : Nmi : Q498S7            | 0.14  | yes | down | 8.2E-08 | yes | chr3  | exon     | last exon       | NA  | 1.58 | no  | up   | 0.09 | no  | 1.02 | no  | up   | 4.1E-02 | yes |
| MSTRG.15557.4 : IntS8 : A0A0G2K0V1      | 0.11  | yes | down | 2.1E-05 | yes | chr5  | intron   | last intron     | NA  | 0.75 | no  | down | 0.50 | no  | 1.07 | no  | up   | 1.6E-05 | yes |
| ENSRNOT00000000471 : Asf1a : A0A0G2JTI3 | 0.41  | yes | down | 1.4E-04 | yes | chr20 | intron   | last intron     | NA  | 1.00 | no  | down | 0.99 | no  | 0.88 | no  | down | 4.8E-08 | yes |
| MSTRG.3249.8 : Specc1 : A0A0G2K5D7      | 5.53  | yes | up   | 1.9E-10 | yes | chr10 | exon     | last exon       | NA  | 0.92 | no  | down | 0.46 | no  | 0.93 | no  | down | 4.4E-09 | yes |
| ENSRNOT00000092663 : Srsf3 : A0A0U1RRV7 | 4.40  | yes | up   | 1.5E-08 | yes | chr20 | intron   | internal intron | NA  | 1.17 | no  | up   | 0.36 | no  | 0.94 | no  | down | 5.5E-08 | yes |
| MSTRG.15963.6 : Ptpd : M0RB22           | 3.73  | yes | up   | 1.3E-08 | yes | chr5  | exon     | internal exon   | NA  | 1.69 | no  | up   | 0.17 | no  | 1.01 | no  | up   | 5.3E-01 | no  |
| MSTRG.10871.4 : Dcun1d1 : D3ZRV0        | 1.60  | yes | up   | 3.7E-04 | yes | chr2  | exon     | internal exon   | NA  | 1.13 | no  | up   | 0.72 | no  | 0.97 | no  | down | 2.6E-02 | yes |
| ENSRNOT00000074378 : Arhgef10l : M0R7W2 | 2.87  | yes | up   | 9.9E-07 | yes | chr5  | intron   | internal intron | NA  | 1.00 | no  | down | 0.56 | no  | 1.13 | no  | up   | 8.4E-04 | yes |
| ENSRNOT00000093376 : Gpx4 : A0A0G2K398  | 0.42  | yes | down | 9.7E-05 | yes | chr7  | intron   | internal intron | NA  | 0.94 | no  | down | 0.74 | no  | 0.91 | no  | down | 1.6E-05 | yes |
| ENSRNOT00000001160 : Vars : Q04462      | 4.99  | yes | up   | 5.5E-05 | yes | chr20 | intron   | internal intron | NA  | 0.77 | no  | down | 0.62 | no  | 1.01 | no  | up   | 2.1E-04 | yes |
| ENSRNOT00000091675 : Khlh22 : D3ZZC3    | 2.85  | yes | up   | 3.5E-06 | yes | chr11 | intron   | internal intron | NA  | 0.84 | no  | down | 0.19 | no  | 0.98 | no  | down | 1.1E-01 | no  |
| MSTRG.3447.1 : Atp2a3 : G3V9U7          | inf   | yes | up   | 2.1E-05 | yes | chr10 | intron   | internal intron | NA  | 0.43 | yes | down | 0.48 | no  | 0.77 | yes | down | 1.7E-16 | yes |
| MSTRG.19895.5 : Hacd3 : D4ABI7          | 0.11  | yes | down | 1.7E-06 | yes | chr8  | intron   | internal intron | NA  | 0.57 | no  | down | 0.27 | no  | 1.02 | no  | up   | 6.2E-05 | yes |
| MSTRG.7835.3 : Tn9st2 : Q66HG5          | 0.39  | yes | down | 9.3E-05 | yes | chr15 | intron   | last intron     | NA  | 0.48 | yes | down | 0.57 | no  | 1.03 | no  | up   | 6.1E-04 | yes |
| MSTRG.4030.1 : Eftud2 : F1LM66          | 4.66  | yes | up   | 6.0E-04 | yes | chr10 | exon     | internal exon   | NA  | 1.97 | no  | up   | 0.48 | no  | 1.02 | no  | up   | 4.9E-02 | yes |
| MSTRG.15065.3 : Plxnd1 : D4AA77         | 0.14  | yes | down | 1.5E-08 | yes | chr4  | intron   | internal intron | NA  | 0.84 | no  | down | 0.71 | no  | 0.94 | no  | down | 1.4E-01 | no  |
| MSTRG.1283.5 : Tm6sf1 : D4A3E7          | 0.12  | yes | down | 9.3E-08 | yes | chr1  | intron   | first intron    | NA  | 1.08 | no  | up   | 0.64 | no  | 1.05 | no  | up   | 5.5E-03 | yes |
| MSTRG.19956.4 : Myo1e : A0A0G2K9E8      | 3.15  | yes | up   | 9.4E-05 | yes | chr8  | intron   | first intron    | NA  | 1.64 | no  | up   | 0.48 | no  | 0.76 | yes | down | 2.6E-20 | yes |
| MSTRG.22064.10 : Arhgap4 : A0A0G2JVF0   | 0.34  | yes | down | 1.4E-05 | yes | chrX  | intron   | internal intron | NA  | 1.74 | no  | up   | 0.19 | no  | 1.07 | no  | up   | 7.1E-04 | yes |
| MSTRG.2580.1 : Sfxn3 : Q9JHY2           | 0.39  | yes | down | 7.8E-05 | yes | chr1  | intron   | internal intron | NA  | 1.28 | no  | up   | 0.08 | no  | 0.98 | no  | down | 7.5E-03 | yes |
| ENSRNOT000000080703 : Abr : A0A0G2JZZ7  | inf   | yes | up   | 3.7E-04 | yes | chr10 | intron   | internal intron | NA  | 0.81 | no  | down | 0.66 | no  | 1.05 | no  | up   | 1.0E-03 | yes |
| MSTRG.17733.1 : Atg2b : Q5EBA2          | 0.42  | yes | down | 4.5E-04 | yes | chr6  | exon     | internal exon   | NA  | 0.96 | no  | down | 0.93 | no  | 1.03 | no  | up   | 1.2E-01 | no  |
| ENSRNOT0000                             |       |     |      |         |     |       |          |                 |     |      |     |      |      |     |      |     |      |         |     |

|                                            |       |     |      |         |     |       |          |                 |     |      |     |      |      |    |      |     |      |         |     |
|--------------------------------------------|-------|-----|------|---------|-----|-------|----------|-----------------|-----|------|-----|------|------|----|------|-----|------|---------|-----|
| MSTRG.7803.1 : Mycbp2 : D4A2D3             | 0.31  | yes | down | 9.2E-06 | yes | chr15 | intron   | internal intron | NA  | 0.93 | no  | down | 0.50 | no | 1.00 | no  | up   | 6.8E-01 | no  |
| MSTRG.16523.3 : Arid1a : D4A3E3            | 0.22  | yes | down | 1.1E-04 | yes | chr5  | intron   | first intron    | NA  | 2.21 | yes | up   | 0.27 | no | 1.00 | no  | down | 2.1E-01 | no  |
| MSTRG.2839.14 : Srrm2 : A0A0G2K2M9         | 1.72  | yes | up   | 9.0E-05 | yes | chr10 | exon     | internal exon   | NA  | 1.19 | no  | up   | 0.71 | no | 1.00 | no  | up   | 9.0E-01 | no  |
| MSTRG.9889.12 : Nflx : F2Z3R4              | 0.58  | yes | down | 1.9E-06 | yes | chr19 | intron   | internal intron | NA  | 0.62 | no  | down | 0.45 | no | 0.77 | yes | down | 2.4E-14 | yes |
| MSTRG.7561.10 : Phf11b : M0RB46            | 3.03  | yes | up   | 2.9E-04 | yes | chr15 | promoter | Intermediate    | LCP | 1.42 | no  | up   | 0.41 | no | 1.15 | no  | up   | 2.3E-06 | yes |
| MSTRG.9721.5 : Cdh11 : F1MAH6              | 1.94  | yes | up   | 2.2E-05 | yes | chr19 | exon     | last exon       | NA  | 1.10 | no  | up   | 0.09 | no | 0.91 | no  | down | 6.5E-11 | yes |
| MSTRG.123.8 : Epb41l2 : D3ZM69             | 0.25  | yes | down | 1.1E-12 | yes | chr1  | intron   | internal intron | NA  | 0.72 | no  | down | 0.42 | no | 0.91 | no  | down | 8.9E-11 | yes |
| ENSRNOT00000077053 : Cdh13 : Q8R490        | 2.07  | yes | up   | 3.3E-06 | yes | chr19 | promoter | Intermediate    | LCP | 1.01 | no  | up   | 0.92 | no | 0.83 | yes | down | 2.3E-16 | yes |
| MSTRG.20352.2 : Ubp1 : D4A030              | 0.44  | yes | down | 2.3E-04 | yes | chr8  | intron   | internal intron | NA  | 1.15 | no  | up   | 0.84 | no | 0.98 | no  | down | 1.9E-01 | no  |
| ENSRNOT00000044116 : Sco1 : B0BNM7         | 0.18  | yes | down | 3.1E-08 | yes | chr10 | promoter | Intermediate    | ICP | 0.92 | no  | down | 0.46 | no | 1.00 | no  | up   | 8.2E-01 | no  |
| ENSRNOT00000073289 : Was : G3V9K5          | 0.60  | yes | down | 2.3E-04 | yes | chrX  | intron   | internal intron | NA  | 1.63 | no  | up   | 0.06 | no | 1.19 | no  | up   | 3.0E-08 | yes |
| MSTRG.6812.5 : Pcdh7 : Q68HB8              | 0     | yes | down | 4.2E-04 | yes | chr14 | exon     | last exon       | NA  | 1.58 | no  | up   | 0.18 | no | 0.94 | no  | down | 1.0E-07 | yes |
| MSTRG.7226.7 : Sec24c : A0A0G2JZF0         | 3.50  | yes | up   | 1.3E-09 | yes | chr15 | intron   | internal intron | NA  | 0.44 | yes | down | 0.52 | no | 1.01 | no  | up   | 2.6E-01 | no  |
| MSTRG.19522.1 : Vps26b : B1WBS4            | 3.89  | yes | up   | 3.2E-04 | yes | chr8  | intron   | internal intron | NA  | 0.93 | no  | down | 0.50 | no | 0.94 | no  | down | 1.6E-09 | yes |
| ENSRNOT00000086473 : Creb5 : A0A0G2K5F0    | 0.10  | yes | down | 1.8E-23 | yes | chr4  | intron   | internal intron | NA  | 0.91 | no  | down | 0.69 | no | 1.01 | no  | up   | 7.4E-01 | no  |
| MSTRG.11379.1 : Txnip : Q5M7W1             | 6.38  | yes | up   | 4.0E-07 | yes | chr2  | exon     | internal exon   | NA  | 0.87 | no  | down | 0.83 | no | 0.85 | no  | down | 1.0E-06 | yes |
| ENSRNOT00000005996 : Pes1 : Q3B8N8         | 4.53  | yes | up   | 2.5E-04 | yes | chr14 | exon     | internal exon   | NA  | 1.02 | no  | up   | 0.79 | no | 1.08 | no  | up   | 1.0E-03 | yes |
| MSTRG.11955.3 : RT1-CE7 : D3ZLE6           | inf   | yes | up   | 7.3E-07 | yes | chr20 | exon     | internal exon   | NA  | 0.73 | no  | down | 0.36 | no | 1.22 | yes | up   | 7.3E-16 | yes |
| MSTRG.21083.17 : Speg : Q63638             | 0.17  | yes | down | 2.6E-06 | yes | chr9  | intron   | internal intron | NA  | 1.10 | no  | up   | 0.63 | no | 0.88 | no  | down | 2.3E-07 | yes |
| MSTRG.5482.19 : Ncor2 : A0A0G2JU91         | 2.16  | yes | up   | 1.6E-06 | yes | chr12 | intron   | internal intron | NA  | 0.93 | no  | down | 0.83 | no | 1.01 | no  | up   | 7.1E-01 | no  |
| MSTRG.3515.1 : Slc43a2 : D3ZDC2            | 17.66 | yes | up   | 2.2E-19 | yes | chr10 | intron   | internal intron | NA  | 1.01 | no  | up   | 0.19 | no | 1.39 | yes | up   | 5.1E-08 | yes |
| MSTRG.12710.1 : Nup214 : D4ACK1            | 0.13  | yes | down | 4.7E-04 | yes | chr3  | intron   | internal intron | NA  | 1.02 | no  | up   | 0.85 | no | 0.99 | no  | down | 6.9E-01 | no  |
| MSTRG.6855.1 : Prom1 : Q9JI49              | 8.32  | yes | up   | 2.4E-09 | yes | chr14 | intron   | internal intron | NA  | 0.45 | yes | down | 0.20 | no | 0.87 | no  | down | 1.5E-05 | yes |
| MSTRG.307.3 : Igf2r : Q63002               | 0.32  | yes | down | 2.3E-06 | yes | chr1  | promoter | Distal          | ICP | 1.00 | no  | down | 0.87 | no | 1.15 | no  | up   | 2.6E-11 | yes |
| MSTRG.5482.18 : Ncor2 : A0A0G2JU91         | 2.16  | yes | up   | 1.6E-06 | yes | chr12 | intron   | internal intron | NA  | 0.72 | no  | down | 0.16 | no | 1.01 | no  | up   | 7.1E-01 | no  |
| ENSRNOT00000090882 : Arhgap26 : A0A0G2K5D5 | 0.31  | yes | down | 2.9E-05 | yes | chr18 | intron   | internal intron | NA  | 1.09 | no  | up   | 0.58 | no | 1.14 | no  | up   | 8.4E-08 | yes |
| ENSRNOT00000030186 : Lsm14a : A0A0G2JUK2   | 0.31  | yes | down | 3.8E-04 | yes | chr1  | intron   | last intron     | NA  | 2.15 | yes | up   | 0.13 | no | 1.02 | no  | up   | 2.8E-01 | no  |
| MSTRG.8278.3 : Rbpms : F2Z3S5              | 0.02  | yes | down | 2.6E-05 | yes | chr16 | promoter | Proximal        | ICP | 1.61 | no  | up   | 0.44 | no | 1.06 | no  | up   | 4.9E-05 | yes |
| ENSRNOT00000040830 : Pds5b : D3ZU56        | 0.26  | yes | down | 2.1E-04 | yes | chr12 | promoter | Intermediate    | LCP | 1.20 | no  | up   | 0.15 | no | 0.96 | no  | down | 4.7E-06 | yes |
| MSTRG.16794.3 : Dnajc11 : B1WBY5           | 2.59  | yes | up   | 1.9E-14 | yes | chr5  | promoter | Intermediate    | ICP | 0.74 | no  | down | 0.06 | no | 0.88 | no  | down | 4.2E-12 | yes |
| MSTRG.5482.1 : Ncor2 : A0A0G2JU91          | 2.16  | yes | up   | 1.6E-06 | yes | chr12 | intron   | internal intron | NA  | 0.77 | no  | down | 0.49 | no | 1.01 | no  | up   | 7.1E-01 | no  |
| MSTRG.9728.1 : Cnot1 : G3V7M0              | 0.08  | yes | down | 2.6E-04 | yes | chr19 | intron   | internal intron | NA  | 2.43 | yes | up   | 0.26 | no | 1.01 | no  | up   | 1.2E-01 | no  |
| MSTRG.19258.1 : Lima1 : F1LR10             | 0.35  | yes | down | 4.4E-04 | yes | chr7  | intron   | internal intron | NA  | 1.00 | no  | down | 1.00 | no | 1.16 | no  | up   | 2.2E-10 | yes |
| MSTRG.1545.2 : Sbf2 : B5DEJ9               | 4.77  | yes | up   | 8.9E-06 | yes | chr1  | intron   | internal intron | NA  | 0.44 | yes | down | 0.31 | no | 1.03 | no  | up   | 9.5E-02 | no  |
| MSTRG.20927.2 : Aox1 : F1LRQ1              | 0.36  | yes | down | 1.5E-07 | yes | chr9  | intron   | internal intron | NA  | 0.98 | no  | down | 0.92 | no | 0.73 | yes | down | 3.5E-17 | yes |
| MSTRG.19524.1 : Jam3 : Q68FQ2              | 0.30  | yes | down | 4.0E-04 | yes | chr8  | exon     | last exon       | NA  | 1.19 | no  | up   | 0.09 | no | 0.97 | no  | down | 8.5E-02 | no  |
| ENSRNOT00000068493 : Dlg4 : P31016         | 2.15  | yes | up   | 8.6E-07 | yes | chr10 | intron   | last intron     | NA  | 0.79 | no  | down | 0.31 | no | 0.97 | no  | down | 9.1E-02 | no  |
| MSTRG.17422.2 : Ppm1a : P20650             | 2.35  | yes | up   | 3.9E-04 | yes | chr6  | intron   | last intron     | NA  | 0.44 | yes | down | 0.45 | no | 0.96 | no  | down | 5.3E-04 | yes |
| ENSRNOT00000080304 : Mark3 : F1M836        | 0.30  | yes | down | 2.6E-04 | yes | chr6  | exon     | last exon       | NA  | 0.99 | no  | down | 0.57 | no | 1.10 | no  | up   | 4.1E-07 | yes |
| MSTRG.10871.2 : Dcun1d1 : D3ZRV0           | 1.60  | yes | up   | 3.7E-04 | yes | chr2  | exon     | internal exon   | NA  | 0.66 | no  | down | 0.46 | no | 0.97 | no  | down | 2.6E-02 | yes |
| ENSRNOT00000085545 : Fmnl2 : A0A0G2K132    | 0.84  | no  | down | 6.1E-07 | yes | chr3  | intron   | internal intron | NA  | 1.05 | no  | up   | 0.78 | no | 1.00 | no  | down | 9.6E-01 | no  |
| MSTRG.18268.3 : Akap8 : Q63014             | 0.08  | yes | down | 2.7E-04 | yes | chr7  | intron   | internal intron | NA  | 1.08 | no  | up   | 0.42 | no | 0.99 | no  | down | 2.8E-01 | no  |
| ENSRNOT00000085158 : Aldh1a3 : A9EEP5      | 0.08  | yes | down | 2.9E-04 | yes | chr1  | promoter | Distal          | ICP | 0.96 | no  | down | 0.94 | no | 0.84 | no  | down | 1.5E-18 | yes |
| MSTRG.16327.4 : Macf1 : A0A0G2K9T4         | 0.36  | yes | down | 1.3E-05 | yes | chr5  | exon     | last exon       | NA  | 1.10 | no  | up   | 0.90 | no | 0.97 | no  | down | 9.0E-11 | yes |
| MSTRG.10589.3 : Itga1 : P18614             | 0.09  | yes | down | 9.6E-08 | yes | chr2  | intron   | internal intron | NA  | 1.34 | no  | up   | 0.70 | no | 0.81 | yes | down | 3.6E-17 | yes |
| MSTRG.4117.4 : Nol11 : A0A0G2K1A9          | 0.21  | yes | down | 9.6E-05 | yes | chr10 | intron   | internal intron | NA  | 0.91 | no  | down | 0.71 | no | 1.06 | no  | up   | 1.9E-03 | yes |
| MSTRG.3783.1 : Acsf2 : Q499N5              | 0.31  | yes | down | 5.4E-07 | yes | chr10 | intron   | internal intron | NA  | 1.12 | no  | up   | 0.56 | no | 0.87 | no  | down | 2.4E-13 | yes |
| MSTRG.2839.1 : Srrm2 : A0A0G2K2M9          | 1.72  | yes | up   | 9.0E-05 | yes | chr10 | exon     | internal exon   | NA  | 0.92 | no  | down | 0.96 | no | 1.00 | no  | up   | 9.0E-01 | no  |
| ENSRNOT00000064840 : Atp2a3 : G3V9U7       | inf   | yes | up   | 2.1E-05 | yes | chr10 | intron   | internal intron | NA  | 0.77 | no  | down | 0.62 | no | 0.77 | yes | down | 1.7E-16 | yes |
| MSTRG.15068.5 : Washc2c : F1LPG9           | 0.05  | yes | down | 2.7E-19 | yes | chr4  | exon     | internal exon   | NA  | 2.24 | yes | up   | 0.11 | no | 1.05 | no  | up   | 2.1E-05 | yes |
| MSTRG.3781.2 : Luc7l3 : D3ZFB2             | 0.31  | yes | down | 4.3E-04 | yes | chr10 | intron   | internal intron | NA  | 0.94 | no  | down | 0.50 | no | 0.98 | no  | down | 9.6E-04 | yes |
| ENSRNOT00000089847 : Dkc1 : P40615         | 0.28  | yes | down | 2.4E-05 | yes | chrX  | intron   | internal intron | NA  | 0.81 | no  | down | 0.21 | no | 0.99 | no  | down | 3.6E-01 | no  |
| ENSRNOT00000079196 : Ensa : P60841         | 2.35  | yes | up   | 1.3E-05 | yes | chr2  | exon     | last exon       | NA  | 1.14 | no  | up   | 0.13 | no | 1.04 | no  | up   | 5.7E-02 | no  |
| MSTRG.11265.31 : Ubp2l : E9PTR4            | 6.62  | yes | up   | 4.0E-04 | yes | chr2  | intron   | internal intron | NA  | 0.94 | no  | down | 0.83 | no | 1.13 | no  | up   | 3.8E-12 | yes |
| ENSRNOT00000041234 : Aplf : F6Q5G6         | 0.12  | yes | down | 8.1E-06 | yes | chr4  | exon     | last exon       | NA  | 1.13 | no  | up   | 0.58 | no | 0.99 | no  | down | 2.8E-01 | no  |
| ENSRNOT00000011490 : Xpc : D4A3D8          | 20.37 | yes | up   | 1.0E-05 | yes | chr4  | exon     | internal exon   | NA  | 1.02 | no  | up   | 0.77 | no | 0.95 | no  | down | 3.2E-02 | yes |
| ENSRNOT00000093066 : Clasp1 : F1LNR1       | 0.36  | yes | down | 6.7E-07 | yes | chr13 | intron   | internal intron | NA  | 1.31 | no  | up   | 0.38 | no | 1.00 | no  | down | 7.0E-01 | no  |
| MSTRG.3351.2 : Polr2a : D4A5A6             | 2.68  | yes | up   | 1.4E-05 | yes | chr10 | exon     | internal exon   | NA  | 0.71 | no  | down | 0.37 | no | 1.00 | no  | down | 6.0E-01 | no  |
| ENSRNOT00000066071 : Affl : D3ZBU5         | 1.49  | yes | up   | 9.8E-06 | yes | chr14 | intron   | internal intron | NA  | 0.99 | no  | down | 0.54 | no | 1.07 | no  | up   | 4.0E-02 | yes |
| MSTRG.6635.2 : Rufy3 : A0A0G2K6A9          | 2.37  | yes | up   | 3.9E-04 | yes | chr14 | promoter | Distal          | LCP | 1.44 | no  | up   | 0.13 | no | 1.11 | no  | up   | 1.3E-05 | yes |
| MSTRG.19472.4 : Dnm2 : A0A0A0MY48          | 0.11  | yes | down | 8.9E-11 | yes | chr8  | intron   | first intron    | NA  | 1.00 | no  | down | 0.99 | no | 1.05 | no  | up   | 2.0E-08 | yes |
| MSTRG.18268.1 : Akap8 : Q63014             | 0.08  | yes | down | 2.7E-04 | yes | chr7  | intron   | internal intron | NA  | 1.02 | no  | up   | 0.92 | no | 0.99 | no  | down | 2.8E-01 | no  |
| MSTRG.20920.1 : Maip1 : Q6AY04             | 27.81 | yes | up   | 1.4E-21 | yes | chr9  | promoter | Intermediate    | ICP | 0.50 | yes | down | 0.24 | no | 0.87 | no  | down | 5.5E-04 | yes |
| MSTRG.162.2 : Tpd52l1 : Q499Q2             | 2.69  | yes | up   | 6.5E-28 | yes | chr1  | promoter | Distal          | LCP | 1.59 | no  | up   | 0.37 | no | 0.97 | no  | down | 5.0E-01 | no  |
| MSTRG.21040.1 : Tns1 : F1LN42              | 0.09  | yes | down | 2.0E-04 | yes | chr9  | intron   | last intron     | NA  | 0.93 | no  | down | 0.94 | no | 0.86 | no  | down | 7.8E-19 | yes |
| MSTRG.862.1 : Lgi4 : Q6P2A4                | inf   | yes | up   | 6.8E-05 | yes | chr1  | promoter | Proximal        | LCP | 0.97 | no  | down | 0.83 | no | 0.77 | yes | down | 1.0E-07 | yes |
| MSTRG.19472.2 : Dnm2 : A0A0A0MY48          | 0.11  | yes | down | 8.9E-11 | yes | chr8  | intron   | first intron    | NA  | 1.05 | no  | up   | 0.81 | no | 1.05 | no  | up   | 2.0E-08 | yes |
| MSTRG.15948.3 : Cdk5rap2 : F1M4B7          | 0     | yes | down | 1.4E-04 | yes | chr5  | intron   | internal intron | NA  | 1.11 | no  | up   | 0.52 | no | 0.98 | no  | down | 2.6E-01 | no  |
| ENSRNOT00000019640 : Lcmt1 : G3V7V9        | 0.40  | yes | down | 4.3E-07 | yes | chr1  | promoter | Distal          | LCP | 0.99 | no  | down | 0.94 | no | 0.98 | no  | down | 7.9E-02 | no  |
| MSTRG.17804.2 : Cdc42bpb : A0A0G2KB58      | 0.39  | yes | down | 3.8E-04 | yes | chr6  | intron   | internal intron | NA  | 1.09 | no  | up   | 0.76 | no | 0.97 | no  | down | 3.6E-07 | yes |
| MSTRG.21039.4 : Tns1 : F1LN42              | 0.09  | yes | down | 2.0E-04 | yes | chr9  | intron   | last intron     | NA  | 0.48 | yes | down | 0.51 | no |      |     |      |         |     |

|                                          |       |     |      |         |     |       |          |                 |     |      |     |      |      |     |      |     |      |         |     |
|------------------------------------------|-------|-----|------|---------|-----|-------|----------|-----------------|-----|------|-----|------|------|-----|------|-----|------|---------|-----|
| MSTRG.19257.2 : Lima1 : FILR10           | 0.35  | yes | down | 4.4E-04 | yes | chr7  | intron   | internal intron | NA  | 3.53 | yes | up   | 0.09 | no  | 1.16 | no  | up   | 2.2E-10 | yes |
| ENSRNOT00000089743 : Fmr1 : Q80WE1       | inf   | yes | up   | 3.0E-04 | yes | chrX  | intron   | internal intron | NA  | 0.77 | no  | down | 0.14 | no  | 1.09 | no  | up   | 7.3E-06 | yes |
| ENSRNOT00000058206 : Tsc22d1 : P62501    | 3.00  | yes | up   | 3.0E-04 | yes | chr15 | promoter | Intermediate    | ICP | 0.78 | no  | down | 0.81 | no  | 0.77 | yes | down | 5.9E-09 | yes |
| MSTRG.7470.9 : Acin1 : E9PST5            | 0.30  | yes | down | 1.1E-04 | yes | chr15 | promoter | Distal          | LCP | 0.71 | no  | down | 0.04 | yes | 0.98 | no  | down | 5.1E-04 | yes |
| MSTRG.20817.4 : Map4k4 : A0A0G2K7W4      | 0.36  | yes | down | 7.1E-05 | yes | chr9  | intron   | internal intron | NA  | 1.14 | no  | up   | 0.79 | no  | 1.10 | no  | up   | 7.1E-06 | yes |
| MSTRG.19188.1 : Rpap3 : Q68FQ7           | 0.29  | yes | down | 4.9E-05 | yes | chr7  | intron   | internal intron | NA  | 1.06 | no  | up   | 0.76 | no  | 1.04 | no  | up   | 2.9E-04 | yes |
| ENSRNOT00000006880 : Itga4 : D3ZMQ3      | 0.24  | yes | down | 2.1E-07 | yes | chr3  | intron   | internal intron | NA  | 1.79 | no  | up   | 0.09 | no  | 0.99 | no  | down | 7.5E-03 | yes |
| ENSRNOT00000076255 : Lsm14a : A0A0G2JUK2 | 0.31  | yes | down | 3.8E-04 | yes | chr1  | intron   | last intron     | NA  | 0.99 | no  | down | 0.99 | no  | 1.02 | no  | up   | 2.8E-01 | no  |
| MSTRG.7056.1 : Myo1g : A0A0G2K6E3        | 0.66  | yes | down | 3.2E-12 | yes | chr14 | intron   | internal intron | NA  | 1.41 | no  | up   | 0.10 | no  | 1.04 | no  | up   | 3.4E-02 | yes |
| MSTRG.12240.6 : Bicc1 : A0A0G2K0Y0       | 5.19  | yes | up   | 5.0E-04 | yes | chr20 | intron   | internal intron | NA  | 0.79 | no  | down | 0.38 | no  | 1.52 | yes | up   | 1.2E-05 | yes |
| MSTRG.8511.3 : Dapk1 : FILNN8            | 0.35  | yes | down | 1.5E-04 | yes | chr17 | intron   | internal intron | NA  | 1.19 | no  | up   | 0.47 | no  | 0.96 | no  | down | 1.0E-01 | no  |
| MSTRG.19538.16 : Nfrkb : D4A421          | 0.58  | yes | down | 1.3E-05 | yes | chr8  | intron   | internal intron | NA  | 0.64 | no  | down | 0.32 | no  | 0.89 | no  | down | 2.5E-03 | yes |
| MSTRG.19306.1 : Krt8 : Q10758            | 0.19  | yes | down | 1.4E-04 | yes | chr7  | exon     | last exon       | NA  | 0.95 | no  | down | 0.55 | no  | 0.83 | yes | down | 4.5E-14 | yes |
| MSTRG.17785.5 : Dync1h1 : M0R9X8         | 0.19  | yes | down | 1.5E-06 | yes | chr6  | intron   | internal intron | NA  | 2.08 | yes | up   | 0.48 | no  | 0.99 | no  | down | 3.4E-03 | yes |
| MSTRG.15720.4 : Pigo : D3ZTP8            | 0.61  | yes | down | 2.7E-05 | yes | chr5  | exon     | internal exon   | NA  | 0.71 | no  | down | 0.44 | no  | 0.80 | yes | down | 9.0E-03 | yes |
| MSTRG.10916.3 : Naa15 : D3ZD89           | 0.53  | yes | down | 3.9E-04 | yes | chr2  | exon     | last exon       | NA  | 1.18 | no  | up   | 0.27 | no  | 1.05 | no  | up   | 5.6E-06 | yes |
| MSTRG.2579.6 : Sfxn3 : Q9JHY2            | 0.39  | yes | down | 7.8E-05 | yes | chr1  | intron   | internal intron | NA  | 0.62 | no  | down | 0.36 | no  | 0.98 | no  | down | 7.5E-03 | yes |
| ENSRNOT00000077406 : Podxl : A0A0G2K2L1  | 0.31  | yes | down | 1.5E-14 | yes | chr4  | intron   | internal intron | NA  | 1.05 | no  | up   | 0.85 | no  | 0.91 | no  | down | 6.5E-07 | yes |
| MSTRG.18880.4 : Plec : Q6S395            | 0.33  | yes | down | 4.2E-06 | yes | chr7  | exon     | last exon       | NA  | 1.31 | no  | up   | 0.08 | no  | 1.03 | no  | up   | 2.2E-01 | no  |
| MSTRG.549.3 : Zc3h4 : D3ZVW3             | 2.19  | yes | up   | 2.6E-04 | yes | chr1  | intron   | internal intron | NA  | 0.86 | no  | down | 0.78 | no  | 0.98 | no  | down | 3.2E-01 | no  |
| ENSRNOT00000016863 : Ppwd1 : D3ZVP6      | 0.23  | yes | down | 1.8E-04 | yes | chr2  | intron   | internal intron | NA  | 1.18 | no  | up   | 0.18 | no  | 1.06 | no  | up   | 3.7E-03 | yes |
| ENSRNOT00000076676 : Parp4 : A0A096MJ98  | 1.23  | yes | up   | 1.1E-06 | yes | chr15 | intron   | last intron     | NA  | 1.05 | no  | up   | 0.37 | no  | 1.00 | no  | down | 9.9E-01 | no  |
| MSTRG.14995.9 : Itpr1 : A0A0A0MY31       | 3.16  | yes | up   | 1.1E-05 | yes | chr4  | intron   | internal intron | NA  | 1.74 | no  | up   | 0.23 | no  | 0.87 | no  | down | 1.1E-14 | yes |
| ENSRNOT00000076204 : Asph : A0A096MKE0   | 2.56  | yes | up   | 9.8E-06 | yes | chr5  | intron   | internal intron | NA  | 0.95 | no  | down | 0.50 | no  | 0.99 | no  | down | 1.3E-01 | no  |
| ENSRNOT00000025758 : Slc25a17 : B2GUY8   | 3.05  | yes | up   | 2.3E-04 | yes | chr7  | intron   | internal intron | NA  | 1.34 | no  | up   | 0.21 | no  | 0.95 | no  | down | 3.0E-02 | yes |
| ENSRNOT00000011049 : Slc9a1 : Q8R4H8     | 0.61  | yes | down | 7.2E-05 | yes | chr5  | intron   | internal intron | NA  | 0.65 | no  | down | 0.11 | no  | 1.05 | no  | up   | 2.8E-01 | no  |
| MSTRG.3481.6 : Tsr1 : D3ZEM8             | 45.59 | yes | up   | 3.4E-04 | yes | chr10 | intron   | internal intron | NA  | 1.15 | no  | up   | 0.40 | no  | 1.00 | no  | down | 9.7E-01 | no  |
| ENSRNOT00000068011 : Rbpms : F2Z3S5      | 0.02  | yes | down | 2.6E-05 | yes | chr16 | promoter | Proximal        | ICP | 1.04 | no  | up   | 0.78 | no  | 1.06 | no  | up   | 4.9E-05 | yes |
| MSTRG.4725.14 : Kalrn : P97924           | 1.54  | yes | up   | 9.1E-07 | yes | chr11 | exon     | last exon       | NA  | 1.08 | no  | up   | 0.70 | no  | 1.04 | no  | up   | 1.6E-04 | yes |
| MSTRG.16755.11 : Kif1b : A0A0G2KA12      | 3.65  | yes | up   | 7.4E-05 | yes | chr5  | intron   | internal intron | NA  | 0.69 | no  | down | 0.42 | no  | 1.05 | no  | up   | 6.5E-02 | no  |
| MSTRG.9198.2 : Osbpl1a : A0A0G2K327      | 0.28  | yes | down | 2.2E-05 | yes | chr18 | intron   | internal intron | NA  | 1.23 | no  | up   | 0.03 | yes | 0.94 | no  | down | 2.8E-02 | yes |
| MSTRG.1675.1 : Arhgap17 : D4AAV2         | 0.83  | yes | down | 2.6E-07 | yes | chr1  | intron   | internal intron | NA  | 0.83 | no  | down | 0.73 | no  | 1.01 | no  | up   | 3.1E-01 | no  |
| ENSRNOT00000050511 : Tst : P24329        | 0.37  | yes | down | 4.2E-05 | yes | chr7  | intron   | last intron     | NA  | 0.47 | yes | down | 0.56 | no  | 0.77 | yes | down | 1.8E-17 | yes |
| ENSRNOT00000080750 : Dapk1 : FILNN8      | 0.35  | yes | down | 1.5E-04 | yes | chr17 | intron   | internal intron | NA  | 0.91 | no  | down | 0.52 | no  | 0.96 | no  | down | 1.0E-01 | no  |
| ENSRNOT00000076099 : Gigyf2 : A0A096MKC0 | 0.59  | yes | down | 1.9E-05 | yes | chr9  | intron   | internal intron | NA  | 0.83 | no  | down | 0.06 | no  | 1.01 | no  | up   | 7.0E-01 | no  |
| MSTRG.5417.10 : Aut2 : F1M388            | 0.04  | yes | down | 4.8E-14 | yes | chr12 | intron   | internal intron | NA  | 1.43 | no  | up   | 0.48 | no  | 1.01 | no  | up   | 5.6E-01 | no  |
| MSTRG.16606.9 : Alpl : P08289            | 0.52  | yes | down | 2.4E-04 | yes | chr5  | promoter | Intermediate    | LCP | 1.00 | no  | down | 0.47 | no  | 1.00 | no  | down | 6.2E-01 | no  |
| MSTRG.13466.4 : Myef2 : A0A0G2K402       | 2.63  | yes | up   | 2.7E-04 | yes | chr3  | promoter | Intermediate    | LCP | 1.47 | no  | up   | 0.16 | no  | 0.93 | no  | down | 4.5E-09 | yes |
| ENSRNOT00000092125 : Anpep : G3V7W7      | 0.25  | yes | down | 1.9E-09 | yes | chr1  | intron   | internal intron | NA  | 1.33 | no  | up   | 0.34 | no  | 1.05 | no  | up   | 3.0E-08 | yes |
| MSTRG.17857.2 : Crip1 : P63255           | 8.66  | yes | up   | 6.1E-05 | yes | chr6  | intron   | first intron    | NA  | 0.07 | yes | down | 0.16 | no  | 1.20 | yes | up   | 1.6E-08 | yes |
| MSTRG.17520.9 : Srsf5 : Q09167           | 0.10  | yes | down | 3.0E-09 | yes | chr6  | promoter | Proximal        | ICP | 1.66 | no  | up   | 0.00 | yes | 1.03 | no  | up   | 4.2E-02 | yes |
| ENSRNOT00000011054 : Bsdcl : D4A3M7      | 0     | yes | down | 2.4E-04 | yes | chr5  | intron   | last intron     | NA  | 0.99 | no  | down | 0.97 | no  | 0.92 | no  | down | 4.2E-04 | yes |
| ENSRNOT00000032569 : Mb21d2 : D4ACS3     | 2.29  | yes | up   | 3.8E-07 | yes | chr11 | exon     | last exon       | NA  | 0.47 | yes | down | 0.08 | no  | 0.98 | no  | down | 6.7E-02 | no  |
| MSTRG.15855.8 : RGD1306148 : F1M446      | 0.22  | yes | down | 4.0E-05 | yes | chr5  | intron   | internal intron | NA  | 1.09 | no  | up   | 0.46 | no  | 1.01 | no  | up   | 7.4E-02 | no  |
| MSTRG.6746.1 : Pds5a : A4L9P7            | 1.26  | yes | up   | 1.3E-13 | yes | chr14 | exon     | last exon       | NA  | 0.88 | no  | down | 0.83 | no  | 1.01 | no  | up   | 2.7E-01 | no  |
| MSTRG.4508.2 : Dyrk1a : Q63470           | 0.26  | yes | down | 2.2E-05 | yes | chr11 | intron   | internal intron | NA  | 1.83 | no  | up   | 0.09 | no  | 1.02 | no  | up   | 1.6E-01 | no  |
| ENSRNOT00000032780 : Eln : A0A0G2JST5    | 3.55  | yes | up   | 3.0E-04 | yes | chr12 | intron   | internal intron | NA  | 0.89 | no  | down | 0.81 | no  | 0.91 | no  | down | 1.2E-01 | no  |
| MSTRG.12973.11 : Rbmsl : A0A0G2K4R7      | 0     | yes | down | 3.3E-05 | yes | chr3  | intron   | internal intron | NA  | 1.22 | no  | up   | 0.17 | no  | 0.97 | no  | down | 1.2E-01 | no  |
| MSTRG.20350.1 : Clasp2 : A0A0G2JZM8      | 0.25  | yes | down | 1.3E-05 | yes | chr8  | intron   | internal intron | NA  | 1.30 | no  | up   | 0.71 | no  | 0.98 | no  | down | 1.8E-01 | no  |
| MSTRG.9568.3 : Nedd4l : F1LRN8           | 2.03  | yes | up   | 3.6E-05 | yes | chr18 | intron   | internal intron | NA  | 1.32 | no  | up   | 0.66 | no  | 0.95 | no  | down | 3.9E-02 | yes |
| MSTRG.7804.3 : Mycbp2 : A0A1W2Q6I3       | 0.31  | yes | down | 9.2E-06 | yes | chr15 | intron   | internal intron | NA  | 0.66 | no  | down | 0.10 | no  | 1.00 | no  | up   | 8.8E-01 | no  |
| MSTRG.12646.2 : Ragef1 : F1M8L9          | inf   | yes | up   | 4.7E-05 | yes | chr3  | intron   | internal intron | NA  | 0.46 | yes | down | 0.30 | no  | 0.88 | no  | down | 4.1E-04 | yes |
| ENSRNOT00000067000 : Man1a2 : D3ZR49     | 1.09  | no  | up   | 3.3E-05 | yes | chr2  | exon     | last exon       | NA  | 1.28 | no  | up   | 0.05 | yes | 1.05 | no  | up   | 1.6E-05 | yes |
| MSTRG.3421.3 : Nup88 : O08658            | 0.25  | yes | down | 1.2E-04 | yes | chr10 | intron   | internal intron | NA  | 2.12 | yes | up   | 0.23 | no  | 0.95 | no  | down | 3.4E-05 | yes |
| MSTRG.9598.5 : Cep192 : D4A3X0           | 4.22  | yes | up   | 1.3E-12 | yes | chr18 | intron   | internal intron | NA  | 0.93 | no  | down | 0.53 | no  | 0.95 | no  | down | 9.1E-04 | yes |
| MSTRG.16327.5 : Macf1 : A0A0G2K9T4       | 0.36  | yes | down | 1.3E-05 | yes | chr5  | exon     | last exon       | NA  | 1.48 | no  | up   | 0.63 | no  | 0.97 | no  | down | 9.0E-11 | yes |
| MSTRG.2527.1 : Pi4k2a : Q99M64           | 0.48  | yes | down | 2.9E-06 | yes | chr1  | intron   | internal intron | NA  | 1.14 | no  | up   | 0.53 | no  | 1.02 | no  | up   | 1.6E-01 | no  |
| MSTRG.13195.5 : Arhgap1 : D4A6C5         | 3.73  | yes | up   | 1.8E-11 | yes | chr3  | intron   | internal intron | NA  | 0.78 | no  | down | 0.71 | no  | 1.04 | no  | up   | 1.7E-04 | yes |
| MSTRG.7804.3 : Mycbp2 : D4A2D3           | 0.31  | yes | down | 9.2E-06 | yes | chr15 | intron   | internal intron | NA  | 0.66 | no  | down | 0.10 | no  | 1.00 | no  | up   | 6.8E-01 | no  |
| MSTRG.9889.7 : Nflx : F2Z3R4             | 0.58  | yes | down | 1.9E-06 | yes | chr19 | intron   | internal intron | NA  | 0.77 | no  | down | 0.45 | no  | 0.77 | yes | down | 2.4E-14 | yes |
| MSTRG.1974.2 : Nap1l4 : Q5U2Z3           | 0.36  | yes | down | 7.2E-05 | yes | chr1  | intron   | internal intron | NA  | 2.54 | yes | up   | 0.31 | no  | 0.98 | no  | down | 3.1E-02 | yes |
| ENSRNOT00000075874 : Smndc1 : Q4QQU6     | inf   | yes | up   | 1.3E-04 | yes | chr1  | promoter | Distal          | LCP | 0.92 | no  | down | 0.57 | no  | 1.06 | no  | up   | 2.2E-04 | yes |
| MSTRG.5050.1 : Elavl1 : B5DF91           | 0.21  | yes | down | 5.3E-09 | yes | chr12 | intron   | internal intron | NA  | 1.41 | no  | up   | 0.01 | yes | 1.05 | no  | up   | 2.2E-07 | yes |
| MSTRG.11953.44 : RT1-CE7 : D3ZLE6        | inf   | yes | up   | 7.3E-07 | yes | chr20 | exon     | internal exon   | NA  | 1.82 | no  | up   | 0.43 | no  | 1.22 | yes | up   | 7.3E-16 | yes |
| MSTRG.5958.4 : Csrp1 : P47875            | 1.98  | yes | up   | 3.9E-04 | yes | chr13 | promoter | Intermediate    | LCP | 0.26 | yes | down | 0.30 | no  | 1.11 | no  | up   | 3.1E-08 | yes |
| ENSRNOT00000086959 : Rap2a : A0A0G2JTW1  | 4.31  | yes | up   | 1.6E-04 | yes | chr15 | intron   | last intron     | NA  | 1.03 | no  | up   | 0.73 | no  | 0.76 | yes | down | 2.5E-10 | yes |
| MSTRG.7500.4 : Tm9sf1 : Q66HF2           | 5.15  | yes | up   | 5.3E-11 | yes | chr15 | intron   | last intron     | NA  | 1.38 | no  | up   | 0.30 | no  | 1.02 | no  | up   | 4.7E-02 | yes |
| MSTRG.3511.2 : Cpd : A0A0G2JY30          | 0.15  | yes | down | 4.3E-04 | yes | chr10 | intron   | internal intron | NA  | 1.63 | no  | up   | 0.10 | no  | 1.13 | no  | up   | 1.1E-08 | yes |
| MSTRG.10475.1 : Tnpo1 : F1LQP9           | 24.87 | yes | up   | 1.6E-05 | yes | chr2  | exon     | internal exon   | NA  | 1.35 | no  | up   | 0.49 | no  | 0.98 | no  | down | 5.8E-02 | no  |
| MSTRG.21202.4 : Lrrfp1 : Q66HF9          | 6.49  | yes | up   | 4.9E-10 | yes | chr9  | exon     | last exon       | NA  | 0.89 | no  | down | 0.79 | no  | 1.15 | no  | up   | 2.1E-11 | yes |
| ENSRNOT00000080345 : Aamp : B0K024       | 0.09  | yes | down | 2.6E-04 | yes | chr9  | promoter | Intermediate    | LCP | 1.01 |     |      |      |     |      |     |      |         |     |

|                                             |       |     |      |         |     |       |          |                 |     |      |     |      |      |     |      |     |      |         |     |
|---------------------------------------------|-------|-----|------|---------|-----|-------|----------|-----------------|-----|------|-----|------|------|-----|------|-----|------|---------|-----|
| MSTRG.19777.8 : Sin3a : A0A0G2K3H5          | 0.53  | yes | down | 4.1E-06 | yes | chr8  | intron   | last intron     | NA  | 1.25 | no  | up   | 0.48 | no  | 0.96 | no  | down | 6.2E-05 | yes |
| ENSRNOT00000072628 : Nup214 : M0RBV9        | 0.13  | yes | down | 4.7E-04 | yes | chr3  | intron   | internal intron | NA  | 0.98 | no  | down | 0.86 | no  | 1.01 | no  | up   | 5.4E-01 | no  |
| ENSRNOT00000024947 : Tubb6 : Q4QQV0         | 0.26  | yes | down | 2.6E-06 | yes | chr18 | intron   | last intron     | NA  | 1.10 | no  | up   | 0.27 | no  | 1.03 | no  | up   | 1.0E-02 | yes |
| MSTRG.20350.4 : Clasp2 : A0A0G2JZM8         | 0.25  | yes | down | 1.3E-05 | yes | chr8  | intron   | internal intron | NA  | 0.96 | no  | down | 0.40 | no  | 0.98 | no  | down | 1.8E-01 | no  |
| ENSRNOT00000023567 : Tpm3 : A0A140TAF0      | 0.37  | yes | down | 8.0E-05 | yes | chr2  | intron   | internal intron | NA  | 1.07 | no  | up   | 0.64 | no  | 1.03 | no  | up   | 4.4E-04 | yes |
| MSTRG.8278.45 : Rbpms : F2Z3S5              | 0.02  | yes | down | 2.6E-05 | yes | chr16 | promoter | Proximal        | ICP | 0.92 | no  | down | 0.73 | no  | 1.06 | no  | up   | 4.9E-05 | yes |
| MSTRG.11167.1 : Iggap3 : D3ZCS4             | 6.61  | yes | up   | 2.3E-04 | yes | chr2  | intron   | internal intron | NA  | 1.06 | no  | up   | 0.84 | no  | 1.06 | no  | up   | 2.0E-01 | no  |
| MSTRG.21046.1 : Aamp : B0K024               | 0.09  | yes | down | 2.6E-04 | yes | chr9  | promoter | Intermediate    | LCP | 0.96 | no  | down | 0.53 | no  | 1.06 | no  | up   | 1.5E-05 | yes |
| MSTRG.18268.18 : Akap8 : Q63014             | 0.08  | yes | down | 2.7E-04 | yes | chr7  | intron   | internal intron | NA  | 1.12 | no  | up   | 0.29 | no  | 0.99 | no  | down | 2.8E-01 | no  |
| ENSRNOT00000087723 : Atp2a3 : G3V9U7        | inf   | yes | up   | 2.1E-05 | yes | chr10 | intron   | internal intron | NA  | 0.83 | no  | down | 0.48 | no  | 0.77 | yes | down | 1.7E-16 | yes |
| MSTRG.8345.2 : Fgfr1 : F1LM54               | 0.22  | yes | down | 3.0E-05 | yes | chr16 | exon     | last exon       | NA  | 1.07 | no  | up   | 0.85 | no  | 1.05 | no  | up   | 1.3E-02 | yes |
| ENSRNOT00000018259 : Dhfr : Q920D2          | 4.07  | yes | up   | 3.2E-04 | yes | chr2  | exon     | last exon       | NA  | 0.94 | no  | down | 0.72 | no  | 0.91 | no  | down | 9.0E-10 | yes |
| MSTRG.6191.7 : Ddr2 : B1WC09                | 0.49  | yes | down | 3.3E-05 | yes | chr13 | exon     | internal exon   | NA  | 0.88 | no  | down | 0.70 | no  | 0.95 | no  | down | 3.2E-01 | no  |
| MSTRG.7229.3 : Usp54 : Q6IE24               | 0.36  | yes | down | 1.9E-04 | yes | chr15 | intron   | internal intron | NA  | 0.62 | no  | down | 0.48 | no  | 0.83 | yes | down | 7.0E-09 | yes |
| MSTRG.5280.7 : Taf6 : Q498R0                | 0.74  | yes | down | 2.2E-06 | yes | chr12 | intron   | internal intron | NA  | 1.46 | no  | up   | 0.18 | no  | 0.91 | no  | down | 1.8E-03 | yes |
| ENSRNOT00000001566 : Pknx1 : Q5BJP1         | 0.26  | yes | down | 3.4E-07 | yes | chr20 | promoter | Proximal        | LCP | 1.45 | no  | up   | 0.03 | yes | 0.89 | no  | down | 7.5E-04 | yes |
| MSTRG.97.6 : Bclaf1 : B1WC16                | 0.67  | yes | down | 1.3E-07 | yes | chr1  | intron   | internal intron | NA  | 0.59 | no  | down | 0.05 | yes | 1.03 | no  | up   | 6.8E-02 | no  |
| MSTRG.2665.4 : Acsf5 : O88813               | 6.59  | yes | up   | 1.3E-04 | yes | chr1  | intron   | last intron     | NA  | 1.03 | no  | up   | 0.58 | no  | 1.08 | no  | up   | 2.2E-08 | yes |
| MSTRG.1158.3 : Mef2a : A0A0G2JSZ4           | 0.04  | yes | down | 2.4E-04 | yes | chr1  | exon     | last exon       | NA  | 0.61 | no  | down | 0.27 | no  | 0.78 | yes | down | 4.1E-07 | yes |
| ENSRNOT00000022095 : Clu : G3V836           | 0.38  | yes | down | 6.6E-05 | yes | chr15 | intron   | first intron    | NA  | 0.82 | no  | down | 0.43 | no  | 1.26 | yes | up   | 5.8E-16 | yes |
| ENSRNOT00000016541 : Ptx3 : D3ZT94          | 0.07  | yes | down | 2.2E-04 | yes | chr2  | intron   | last intron     | NA  | 1.80 | no  | up   | 0.26 | no  | 1.08 | no  | up   | 3.1E-07 | yes |
| ENSRNOT00000064613 : Tln2 : D3ZA84          | 3.91  | yes | up   | 1.0E-11 | yes | chr8  | intron   | internal intron | NA  | 1.11 | no  | up   | 0.52 | no  | 0.87 | no  | down | 7.8E-17 | yes |
| ENSRNOT00000016991 : Podxl : A0A0G2K2L1     | 0.31  | yes | down | 1.5E-14 | yes | chr4  | intron   | internal intron | NA  | 0.67 | no  | down | 0.07 | no  | 0.91 | no  | down | 6.5E-07 | yes |
| ENSRNOT00000009779 : Nbas : F1M0U5          | 5.28  | yes | up   | 7.6E-38 | yes | chr6  | intron   | internal intron | NA  | 1.14 | no  | up   | 0.01 | yes | 1.02 | no  | up   | 1.1E-03 | yes |
| ENSRNOT00000084700 : Golt1b : B0BNB0        | 0.74  | yes | down | 1.2E-04 | yes | chr4  | intron   | first intron    | NA  | 0.62 | no  | down | 0.50 | no  | 0.99 | no  | down | 5.4E-01 | no  |
| ENSRNOT00000091084 : Ptpnm2 : A0A0G2JW50    | 2.70  | yes | up   | 3.9E-04 | yes | chr12 | promoter | Distal          | LCP | 1.08 | no  | up   | 0.64 | no  | 0.89 | no  | down | 1.9E-08 | yes |
| MSTRG.8713.1 : Sirt5 : Q68FX9               | 6.16  | yes | up   | 1.6E-04 | yes | chr17 | intron   | internal intron | NA  | 0.95 | no  | down | 0.90 | no  | 1.01 | no  | up   | 5.1E-01 | no  |
| MSTRG.2839.3 : Srm2 : A0A0G2K2M9            | 1.72  | yes | up   | 9.0E-05 | yes | chr10 | exon     | internal exon   | NA  | 0.99 | no  | down | 1.00 | no  | 1.00 | no  | up   | 9.0E-01 | no  |
| ENSRNOT00000046201 : Mt-atp8 : P11608       | 1.03  | no  | up   | 5.1E-02 | no  | chrMT | promoter | Distal          | ICP | 0.44 | yes | down | 0.36 | no  | 0.92 | no  | down | 1.1E-09 | yes |
| MSTRG.8772.2 : Serpinb6b : Q68FX2           | 5.33  | yes | up   | 5.8E-08 | yes | chr17 | promoter | Distal          | LCP | 1.25 | no  | up   | 0.35 | no  | 0.95 | no  | down | 6.3E-06 | yes |
| MSTRG.18046.4 : Pan2 : R9PXX6               | 2.14  | yes | up   | 4.2E-04 | yes | chr7  | exon     | internal exon   | NA  | 1.78 | no  | up   | 0.14 | no  | 0.84 | no  | down | 1.2E-03 | yes |
| MSTRG.10153.8 : Cmp1 : A0A0G2JYB9           | 0.58  | yes | down | 9.9E-05 | yes | chr19 | intron   | internal intron | NA  | 0.71 | no  | down | 0.31 | no  | 0.89 | no  | down | 2.1E-04 | yes |
| MSTRG.4030.5 : Eftud2 : F1LM66              | 4.66  | yes | up   | 6.0E-04 | yes | chr10 | exon     | internal exon   | NA  | 1.02 | no  | up   | 0.28 | no  | 1.02 | no  | up   | 4.9E-02 | yes |
| MSTRG.6707.1 : Spata18 : Q6AYL6             | 1.61  | yes | up   | 6.3E-07 | yes | chr14 | intron   | internal intron | NA  | 0.32 | yes | down | 0.22 | no  | 0.76 | yes | down | 1.3E-15 | yes |
| ENSRNOT00000067486 : Fat1 : G3V9W9          | 0.12  | yes | down | 1.5E-10 | yes | chr16 | exon     | last exon       | NA  | 1.13 | no  | up   | 0.78 | no  | 1.12 | no  | up   | 2.9E-12 | yes |
| ENSRNOT00000092613 : Washe2c : F1LPG9       | 0.05  | yes | down | 2.7E-19 | yes | chr4  | exon     | internal exon   | NA  | 0.94 | no  | down | 0.32 | no  | 1.05 | no  | up   | 2.1E-05 | yes |
| ENSRNOT00000088945 : Plec : Q6S3A0          | 0.33  | yes | down | 4.2E-06 | yes | chr7  | exon     | last exon       | NA  | 1.11 | no  | up   | 0.50 | no  | 1.11 | no  | up   | 6.0E-08 | yes |
| MSTRG.256.3 : Syne1 : Q8VHJ9                | 0.04  | yes | down | 1.5E-19 | yes | chr1  | exon     | first exon      | NA  | 5.56 | yes | up   | 0.14 | no  | 0.89 | no  | down | 8.9E-14 | yes |
| ENSRNOT00000036035 : Vrk1 : Q6AYA2          | 0.22  | yes | down | 2.5E-07 | yes | chr6  | intron   | internal intron | NA  | 0.94 | no  | down | 0.91 | no  | 1.01 | no  | up   | 2.7E-01 | no  |
| ENSRNOT00000019910 : Prpf4 : D4A7J8         | 0.23  | yes | down | 2.8E-04 | yes | chr5  | exon     | last exon       | NA  | 0.98 | no  | down | 0.86 | no  | 1.03 | no  | up   | 3.4E-04 | yes |
| MSTRG.1158.2 : Mef2a : A0A0G2JSZ4           | 0.04  | yes | down | 2.4E-04 | yes | chr1  | exon     | last exon       | NA  | 0.82 | no  | down | 0.58 | no  | 0.78 | yes | down | 4.1E-07 | yes |
| ENSRNOT00000066098 : Plpp1 : O08564         | 0.47  | yes | down | 8.3E-05 | yes | chr2  | intron   | internal intron | NA  | 0.79 | no  | down | 0.21 | no  | 1.04 | no  | up   | 2.9E-03 | yes |
| MSTRG.17520.5 : Srsf5 : Q09167              | 0.10  | yes | down | 3.0E-09 | yes | chr6  | promoter | Proximal        | ICP | 0.40 | yes | down | 0.41 | no  | 1.03 | no  | up   | 4.2E-02 | yes |
| MSTRG.6211.8 : Fcgr2b : A3RLA8              | 0.44  | yes | down | 2.8E-04 | yes | chr13 | promoter | Distal          | LCP | 1.30 | no  | up   | 0.64 | no  | 1.04 | no  | up   | 4.3E-03 | yes |
| ENSRNOT00000005977 : Cep131 : D4AEL8        | 3.69  | yes | up   | 1.2E-04 | yes | chr10 | intron   | last intron     | NA  | 0.88 | no  | down | 0.10 | no  | 0.92 | no  | down | 1.5E-02 | yes |
| MSTRG.18880.6 : Plec : F7F9U6               | 0.33  | yes | down | 4.2E-06 | yes | chr7  | exon     | last exon       | NA  | 0.59 | no  | down | 0.48 | no  | 0.90 | no  | down | 2.5E-03 | yes |
| MSTRG.15479.1 : Prex2 : A0A0G2KA11          | 5.57  | yes | up   | 1.6E-04 | yes | chr5  | intron   | internal intron | NA  | 1.68 | no  | up   | 0.17 | no  | 1.02 | no  | up   | 2.3E-01 | no  |
| ENSRNOT00000014810 : Bet1 : Q62896          | 0.17  | yes | down | 3.0E-07 | yes | chr4  | intron   | first intron    | NA  | 1.13 | no  | up   | 0.20 | no  | 1.04 | no  | up   | 9.9E-04 | yes |
| MSTRG.14695.3 : Ptdc3 : D3ZGM1              | 3.88  | yes | up   | 4.1E-35 | yes | chr4  | intron   | internal intron | NA  | 2.41 | yes | up   | 0.09 | no  | 0.98 | no  | down | 3.1E-01 | no  |
| ENSRNOT00000010481 : Traml : Q5XI41         | 3.29  | yes | up   | 2.9E-05 | yes | chr5  | exon     | last exon       | NA  | 1.19 | no  | up   | 0.19 | no  | 1.13 | no  | up   | 1.2E-09 | yes |
| MSTRG.7470.13 : Acin1 : E9PST5              | 0.30  | yes | down | 1.1E-04 | yes | chr15 | promoter | Distal          | LCP | 1.02 | no  | up   | 0.97 | no  | 0.98 | no  | down | 5.1E-04 | yes |
| MSTRG.10799.1 : Gyg1 : F8WFR6               | 0.52  | yes | down | 3.8E-05 | yes | chr2  | intron   | internal intron | NA  | 1.44 | no  | up   | 0.52 | no  | 1.17 | no  | up   | 1.9E-09 | yes |
| ENSRNOT00000075425 : Ahsa1 : B0BN63         | 0.11  | yes | down | 3.3E-06 | yes | chr6  | exon     | last exon       | NA  | 1.21 | no  | up   | 0.37 | no  | 1.00 | no  | up   | 4.2E-01 | no  |
| ENSRNOT00000022373 : Zcchc6 : D3ZKR9        | 0.14  | yes | down | 1.2E-08 | yes | chr17 | exon     | internal exon   | NA  | 0.99 | no  | down | 0.32 | no  | 1.12 | no  | up   | 2.3E-06 | yes |
| ENSRNOT00000092945 : Picalm : A0A1B0GWW9    | 8.74  | yes | up   | 2.1E-13 | yes | chr1  | intron   | internal intron | NA  | 0.63 | no  | down | 0.04 | yes | 1.04 | no  | up   | 1.0E-01 | no  |
| ENSRNOT00000088549 : Itgav : F1LZX9         | 24.74 | yes | up   | 1.9E-17 | yes | chr3  | intron   | first intron    | NA  | 1.06 | no  | up   | 0.76 | no  | 0.92 | no  | down | 1.7E-15 | yes |
| MSTRG.10007.4 : Ctfcl : Q9RID1              | 2.29  | yes | up   | 1.4E-04 | yes | chr19 | intron   | internal intron | NA  | 1.79 | no  | up   | 0.11 | no  | 0.94 | no  | down | 4.5E-07 | yes |
| MSTRG.14924.1 : Xpc : D4A3D8                | 20.37 | yes | up   | 1.0E-05 | yes | chr4  | exon     | internal exon   | NA  | 1.11 | no  | up   | 0.35 | no  | 0.95 | no  | down | 3.2E-02 | yes |
| MSTRG.7503.2 : Gmpr2 : A0A0G2JX25           | 0.33  | yes | down | 2.2E-06 | yes | chr15 | promoter | Distal          | LCP | 0.91 | no  | down | 0.09 | no  | 0.95 | no  | down | 1.0E-01 | no  |
| MSTRG.9568.8 : Nedd4l : F1LRN8              | 2.03  | yes | up   | 3.6E-05 | yes | chr18 | intron   | internal intron | NA  | 0.60 | no  | down | 0.19 | no  | 0.95 | no  | down | 3.9E-02 | yes |
| ENSRNOT00000066808 : Ctnnb1 : Q4V8K2        | 5.63  | yes | up   | 4.6E-05 | yes | chr3  | intron   | first intron    | NA  | 1.04 | no  | up   | 0.57 | no  | 1.01 | no  | up   | 3.8E-01 | no  |
| ENSRNOT0000005033 : Acot9 : Q5U2X8          | 0.09  | yes | down | 5.0E-06 | yes | chrX  | promoter | Distal          | LCP | 1.00 | no  | down | 0.97 | no  | 0.99 | no  | down | 5.1E-02 | no  |
| MSTRG.7470.7 : Acin1 : E9PST5               | 0.30  | yes | down | 1.1E-04 | yes | chr15 | promoter | Distal          | LCP | 1.56 | no  | up   | 0.22 | no  | 0.98 | no  | down | 5.1E-04 | yes |
| ENSRNOT000000086424 : Tmem38a : A6ZIQ8      | 9.90  | yes | up   | 7.7E-05 | yes | chr16 | promoter | Intermediate    | LCP | 0.98 | no  | down | 0.92 | no  | 0.79 | yes | down | 1.0E-01 | no  |
| ENSRNOT00000084350 : Sec24c : A0A0G2JZF0    | 3.50  | yes | up   | 1.3E-09 | yes | chr15 | intron   | internal intron | NA  | 1.36 | no  | up   | 0.51 | no  | 1.01 | no  | up   | 2.6E-01 | no  |
| ENSRNOT00000085530 : LOC361016 : A0A0G2JX10 | 0.05  | yes | down | 2.2E-18 | yes | chr15 | intron   | first intron    | NA  | 0.88 | no  | down | 0.07 | no  | 1.05 | no  | up   | 2.5E-01 | no  |
| MSTRG.8345.13 : Fgfr1 : F1LM54              | 0.22  | yes | down | 3.0E-05 | yes | chr16 | exon     | last exon       | NA  | 0.73 | no  | down | 0.28 | no  | 1.05 | no  | up   | 1.3E-02 | yes |
| ENSRNOT00000079407 : Masp2 : A2VCV7         | 0.27  | yes | down | 4.0E-08 | yes | chr5  | intron   | internal intron | NA  | 1.14 | no  | up   | 0.22 | no  | 1.00 | no  | down | 8.1E-01 | no  |
| ENSRNOT00000035400 : Fcgr2b : A3RLA8        | 0.44  | yes | down | 2.8E-04 | yes | chr13 | promoter | Distal          | LCP | 1.18 | no  | up   | 0.64 | no  | 1.04 | no  | up   | 4.3E-03 | yes |
| ENSRNOT00000021716 : Coq9 : Q68FT1          | 0.32  | yes | down | 5.1E-11 | yes | chr19 | promoter | Distal          | LCP | 1.42 | no  | up   | 0.59 | no  | 0.93 | no  | down | 1.8E-05 | yes |
| MSTRG.14118.4 : Kmt2c : A0A0G2K426          | 0.22  | yes | down | 1.1E-11 | yes | chr4  | promoter |                 |     |      |     |      |      |     |      |     |      |         |     |

|                                          |       |     |      |         |     |       |          |                 |     |      |     |      |      |     |      |     |      |         |     |
|------------------------------------------|-------|-----|------|---------|-----|-------|----------|-----------------|-----|------|-----|------|------|-----|------|-----|------|---------|-----|
| MSTRG.18129.4 : Nfic : O70188            | 1.68  | yes | up   | 1.4E-06 | yes | chr7  | intron   | internal intron | NA  | 1.00 | no  | down | 0.97 | no  | 0.85 | no  | down | 3.8E-12 | yes |
| MSTRG.323.12 : LOC108348175 : A0A0G2JUS0 | 0.05  | yes | down | 4.0E-19 | yes | chr1  | promoter | Intermediate    | LCP | 0.86 | no  | down | 0.39 | no  | 1.01 | no  | up   | 4.0E-01 | no  |
| ENSRNOT00000058387 : Focad : F1LU27      | 5.61  | yes | up   | 3.5E-06 | yes | chr5  | intron   | internal intron | NA  | 0.94 | no  | down | 0.51 | no  | 1.10 | no  | up   | 1.2E-08 | yes |
| MSTRG.3349.2 : Senp3 : Q3MID8            | 0.16  | yes | down | 5.8E-06 | yes | chr10 | exon     | internal exon   | NA  | 1.33 | no  | up   | 0.08 | no  | 0.90 | no  | down | 1.2E-11 | yes |
| ENSRNOT00000081023 : Fat1 : G3V9W9       | 0.12  | yes | down | 1.5E-10 | yes | chr16 | exon     | last exon       | NA  | 2.39 | yes | up   | 0.24 | no  | 1.12 | no  | up   | 2.9E-12 | yes |
| MSTRG.13466.3 : Myef2 : A0A0G2K402       | 2.63  | yes | up   | 2.7E-04 | yes | chr3  | promoter | Intermediate    | LCP | 2.62 | yes | up   | 0.09 | no  | 0.93 | no  | down | 4.5E-09 | yes |
| MSTRG.20698.4 : Tram2 : F1LUA2           | 3     | yes | up   | 2.1E-05 | yes | chr9  | intron   | first intron    | NA  | 0.62 | no  | down | 0.55 | no  | 1.02 | no  | up   | 1.2E-01 | no  |
| ENSRNOT00000061515 : Clasp1 : F1LNR1     | 0.36  | yes | down | 6.7E-07 | yes | chr13 | intron   | internal intron | NA  | 1.02 | no  | up   | 0.47 | no  | 1.00 | no  | down | 7.0E-01 | no  |
| MSTRG.12111.3 : Cmt1 : Q5U2Z5            | 4.09  | yes | up   | 4.3E-15 | yes | chr20 | intron   | internal intron | NA  | 1.12 | no  | up   | 0.12 | no  | 1.00 | no  | down | 9.7E-01 | no  |
| MSTRG.1283.4 : Tm6sf1 : D4A3E7           | 0.12  | yes | down | 9.3E-08 | yes | chr1  | intron   | first intron    | NA  | 1.06 | no  | up   | 0.70 | no  | 1.05 | no  | up   | 5.5E-03 | yes |
| MSTRG.2257.3 : Ddb1 : G3V8T4             | inf   | yes | up   | 1.9E-05 | yes | chr1  | intron   | internal intron | NA  | 1.65 | no  | up   | 0.48 | no  | 0.97 | no  | down | 4.7E-09 | yes |
| ENSRNOT00000010180 : Cd63 : Q9QZV0       | 0.47  | yes | down | 3.6E-06 | yes | chr7  | promoter | Intermediate    | ICP | 1.02 | no  | up   | 0.92 | no  | 0.56 | yes | down | 4.8E-03 | yes |
| ENSRNOT00000092754 : Gtf2i : Q5U2Y1      | 5.31  | yes | up   | 4.9E-06 | yes | chr12 | promoter | Distal          | LCP | 1.02 | no  | up   | 0.75 | no  | 0.95 | no  | down | 1.5E-07 | yes |
| ENSRNOT00000078500 : Tm6sf1 : D4A3E7     | 0.12  | yes | down | 9.3E-08 | yes | chr1  | intron   | first intron    | NA  | 0.98 | no  | down | 0.91 | no  | 1.05 | no  | up   | 5.5E-03 | yes |
| ENSRNOT00000093625 : Kmt2c : A0A0G2K426  | 0.22  | yes | down | 1.1E-11 | yes | chr4  | promoter | Distal          | LCP | 1.22 | no  | up   | 0.60 | no  | 0.69 | yes | down | 1.4E-11 | yes |
| MSTRG.18206.7 : Cirbp : P60825           | 0.73  | yes | down | 1.3E-04 | yes | chr7  | exon     | first exon      | NA  | 0.82 | no  | down | 0.59 | no  | 0.85 | no  | down | 3.4E-16 | yes |
| ENSRNOT00000049245 : Pcdh7 : Q68HB8      | 0     | yes | down | 4.2E-04 | yes | chr14 | exon     | last exon       | NA  | 1.16 | no  | up   | 0.57 | no  | 0.94 | no  | down | 1.0E-07 | yes |
| ENSRNOT00000092700 : Tecpr1 : Q3ZBA0     | 0.43  | yes | down | 3.1E-04 | yes | chr12 | promoter | Intermediate    | LCP | 1.02 | no  | up   | 0.73 | no  | 1.17 | no  | up   | 7.7E-08 | yes |
| MSTRG.12973.6 : Rbms1 : A0A0G2K4R7       | 0     | yes | down | 3.3E-05 | yes | chr3  | intron   | internal intron | NA  | 1.00 | no  | down | 0.47 | no  | 0.97 | no  | down | 1.2E-01 | no  |
| MSTRG.4866.3 : Vps8 : D4A5F7             | 7.39  | yes | up   | 3.4E-05 | yes | chr11 | intron   | internal intron | NA  | 1.28 | no  | up   | 0.08 | no  | 0.95 | no  | down | 3.2E-03 | yes |
| MSTRG.7965.3 : Bmpr1a : Q78EA7           | 0.29  | yes | down | 2.1E-04 | yes | chr16 | intron   | internal intron | NA  | 0.78 | no  | down | 0.59 | no  | 0.90 | no  | down | 9.8E-10 | yes |
| ENSRNOT00000043902 : Tnpo3 : D4AAM0      | 6.44  | yes | up   | 4.2E-12 | yes | chr4  | promoter | Distal          | LCP | 0.98 | no  | down | 0.82 | no  | 1.04 | no  | up   | 4.3E-04 | yes |
| MSTRG.5482.12 : Ncor2 : A0A0G2JU91       | 2.16  | yes | up   | 1.6E-06 | yes | chr12 | intron   | internal intron | NA  | 1.21 | no  | up   | 0.59 | no  | 1.01 | no  | up   | 7.1E-01 | no  |
| MSTRG.2257.1 : Ddb1 : G3V8T4             | inf   | yes | up   | 1.9E-05 | yes | chr1  | intron   | internal intron | NA  | 1.78 | no  | up   | 0.46 | no  | 0.97 | no  | down | 4.7E-09 | yes |
| MSTRG.97.12 : Bclaf1 : B1WC16            | 0.67  | yes | down | 1.3E-07 | yes | chr1  | intron   | internal intron | NA  | 0.70 | no  | down | 0.24 | no  | 1.03 | no  | up   | 6.8E-02 | no  |
| ENSRNOT00000049180 : Adcy5 : G3V9G1      | 0.16  | yes | down | 2.3E-10 | yes | chr11 | intron   | internal intron | NA  | 1.13 | no  | up   | 0.75 | no  | 1.00 | no  | down | 7.6E-01 | no  |
| MSTRG.18495.2 : Tbc1d15 : F7EZ89         | 0     | yes | down | 1.6E-05 | yes | chr7  | exon     | internal exon   | NA  | 1.08 | no  | up   | 0.73 | no  | 0.98 | no  | down | 2.3E-02 | yes |
| MSTRG.17586.4 : Ylpm1 : A0A0G2K678       | 0.14  | yes | down | 2.3E-07 | yes | chr6  | intron   | internal intron | NA  | 1.04 | no  | up   | 0.85 | no  | 1.02 | no  | up   | 1.8E-03 | yes |
| MSTRG.12226.2 : Bcr : F1LXF1             | 2.12  | yes | up   | 1.3E-04 | yes | chr20 | intron   | first intron    | NA  | 0.82 | no  | down | 0.40 | no  | 0.96 | no  | down | 8.7E-05 | yes |
| MSTRG.20963.2 : Nbeal1 : F1M6V0          | 4.79  | yes | up   | 6.8E-08 | yes | chr9  | intron   | internal intron | NA  | 0.86 | no  | down | 0.54 | no  | 1.00 | no  | up   | 5.1E-01 | no  |
| MSTRG.10325.3 : Cast : F1LPH1            | 0.36  | yes | down | 1.6E-06 | yes | chr2  | intron   | internal intron | NA  | 1.09 | no  | up   | 0.72 | no  | 0.95 | no  | down | 2.4E-10 | yes |
| MSTRG.276.6 : Arid1b : F1LNP1            | 1.53  | yes | up   | 6.5E-08 | yes | chr1  | promoter | Proximal        | LCP | 0.32 | yes | down | 0.04 | yes | 0.98 | no  | down | 1.8E-01 | no  |
| MSTRG.21122.5 : Agfg1 : F1M9N7           | 3.59  | yes | up   | 1.8E-08 | yes | chr9  | exon     | internal exon   | NA  | 0.91 | no  | down | 0.75 | no  | 1.16 | no  | up   | 6.0E-06 | yes |
| MSTRG.12626.1 : Col5a1 : A0A0G2JX47      | 0.33  | yes | down | 4.5E-04 | yes | chr3  | intron   | internal intron | NA  | 1.00 | no  | down | 1.00 | no  | 1.01 | no  | up   | 4.0E-01 | no  |
| ENSRNOT00000018670 : Senp3 : Q3MID8      | 0.16  | yes | down | 5.8E-06 | yes | chr10 | exon     | internal exon   | NA  | 1.04 | no  | up   | 0.28 | no  | 0.90 | no  | down | 1.2E-11 | yes |
| MSTRG.6203.1 : Olfm12b : D4A0J7          | 0.13  | yes | down | 2.7E-04 | yes | chr13 | exon     | internal exon   | NA  | 1.03 | no  | up   | 0.96 | no  | 1.06 | no  | up   | 4.0E-07 | yes |
| ENSRNOT00000016751 : Uqcrh : Q5M9I5      | 15.45 | yes | up   | 1.6E-15 | yes | chr5  | exon     | last exon       | NA  | 0.78 | no  | down | 0.04 | yes | 0.98 | no  | down | 3.9E-01 | no  |
| ENSRNOT000000024575 : Tpm1 : A0A0G2JSQ4  | 9.41  | yes | up   | 5.1E-14 | yes | chr8  | intron   | internal intron | NA  | 0.69 | no  | down | 0.37 | no  | 0.81 | yes | down | 2.5E-10 | yes |
| MSTRG.9106.2 : Neb1 : F1LVX3             | 0     | yes | down | 3.8E-04 | yes | chr17 | intron   | first intron    | NA  | 1.00 | no  | down | 0.04 | yes | 1.02 | no  | up   | 2.0E-01 | no  |
| MSTRG.15110.5 : Wnk1 : Q9JIH7            | 18.77 | yes | up   | 1.6E-38 | yes | chr4  | exon     | internal exon   | NA  | 2.38 | yes | up   | 0.09 | no  | 1.04 | no  | up   | 1.7E-03 | yes |
| ENSRNOT00000017838 : Myl1 : P02600       | 2.29  | yes | up   | 4.3E-05 | yes | chr9  | promoter | Distal          | LCP | 1.05 | no  | up   | 0.19 | no  | 1.33 | yes | up   | 6.1E-13 | yes |
| ENSRNOT00000050321 : Erlec1 : D3ZF97     | 0.05  | yes | down | 1.8E-18 | yes | chr14 | intron   | internal intron | NA  | 0.94 | no  | down | 0.17 | no  | 1.05 | no  | up   | 1.1E-04 | yes |
| ENSRNOT00000093657 : Timm50 : D3ZJX5     | 0.54  | yes | down | 3.3E-07 | yes | chr1  | exon     | last exon       | NA  | 1.04 | no  | up   | 0.72 | no  | 0.98 | no  | down | 4.2E-02 | yes |
| ENSRNOT000000026580 : Lamp1 : P14562     | 0.27  | yes | down | 5.9E-08 | yes | chr16 | promoter | Distal          | LCP | 1.12 | no  | up   | 0.47 | no  | 1.10 | no  | up   | 5.4E-06 | yes |
| ENSRNOT000000035628 : Ywhaz : P63102     | 3.68  | yes | up   | 2.7E-04 | yes | chr7  | intron   | last intron     | NA  | 1.08 | no  | up   | 0.74 | no  | 0.87 | no  | down | 1.2E-13 | yes |
| MSTRG.3379.2 : Dlg4 : P31016             | 2.15  | yes | up   | 8.6E-07 | yes | chr10 | intron   | last intron     | NA  | 1.23 | no  | up   | 0.42 | no  | 0.97 | no  | down | 9.1E-02 | no  |
| MSTRG.13466.2 : Myef2 : A0A0G2K402       | 2.63  | yes | up   | 2.7E-04 | yes | chr3  | promoter | Intermediate    | LCP | 0.89 | no  | down | 0.75 | no  | 0.93 | no  | down | 4.5E-09 | yes |
| MSTRG.9433.3 : Rbm27 : F1M1R4            | 0.45  | yes | down | 2.5E-04 | yes | chr18 | intron   | internal intron | NA  | 0.76 | no  | down | 0.15 | no  | 1.01 | no  | up   | 5.2E-01 | no  |
| MSTRG.7470.12 : Acin1 : E9PST5           | 0.30  | yes | down | 1.1E-04 | yes | chr15 | promoter | Distal          | LCP | 0.64 | no  | down | 0.12 | no  | 0.98 | no  | down | 5.1E-04 | yes |
| ENSRNOT00000051857 : Hdh2 : Q6QI86       | 0.20  | yes | down | 5.1E-06 | yes | chr18 | intron   | first intron    | NA  | 1.03 | no  | up   | 0.38 | no  | 1.04 | no  | up   | 3.3E-03 | yes |
| MSTRG.5025.7 : Pds5b : D3ZU56            | 0.26  | yes | down | 2.1E-04 | yes | chr12 | promoter | Intermediate    | LCP | 1.04 | no  | up   | 0.90 | no  | 0.96 | no  | down | 4.7E-06 | yes |
| MSTRG.9435.1 : Tcerg1 : B5DEZ4           | 0.26  | yes | down | 2.8E-04 | yes | chr18 | promoter | Intermediate    | ICP | 0.99 | no  | down | 0.99 | no  | 1.02 | no  | up   | 4.4E-02 | yes |
| MSTRG.10007.5 : Ctf2 : Q9R1D1            | 2.29  | yes | up   | 1.4E-04 | yes | chr19 | intron   | internal intron | NA  | 0.86 | no  | down | 0.56 | no  | 0.94 | no  | down | 4.5E-07 | yes |
| ENSRNOT00000080453 : Apoe : P02650       | 0.23  | yes | down | 3.2E-04 | yes | chr1  | exon     | last exon       | NA  | 0.99 | no  | down | 0.95 | no  | 0.86 | no  | down | 6.2E-12 | yes |
| MSTRG.14075.5 : Dnajc5 : A0A0G2JX56      | 0.30  | yes | down | 1.1E-06 | yes | chr3  | promoter | Intermediate    | HCP | 0.57 | no  | down | 0.16 | no  | 0.89 | no  | down | 4.0E-08 | yes |
| MSTRG.5340.1 : Serpine1 : F1LM16         | 2.28  | yes | up   | 2.6E-04 | yes | chr12 | exon     | last exon       | NA  | 0.49 | yes | down | 0.32 | no  | 1.00 | no  | down | 7.7E-01 | no  |
| ENSRNOT00000014354 : Cachd1 : D4ADK4     | 1.98  | yes | up   | 2.7E-04 | yes | chr5  | intron   | internal intron | NA  | 0.98 | no  | down | 0.90 | no  | 0.99 | no  | down | 6.0E-01 | no  |
| MSTRG.21273.2 : Fer : A0A140TAC4         | 3.31  | yes | up   | 2.7E-04 | yes | chr9  | promoter | Proximal        | LCP | 1.33 | no  | up   | 0.05 | yes | 0.92 | no  | down | 7.3E-07 | yes |
| MSTRG.9598.1 : Cep192 : D4A3X0           | 4.22  | yes | up   | 1.3E-12 | yes | chr18 | intron   | internal intron | NA  | 1.11 | no  | up   | 0.20 | no  | 0.95 | no  | down | 9.1E-04 | yes |
| MSTRG.9598.3 : Cep192 : D4A3X0           | 4.22  | yes | up   | 1.3E-12 | yes | chr18 | intron   | internal intron | NA  | 0.93 | no  | down | 0.43 | no  | 0.95 | no  | down | 9.1E-04 | yes |
| MSTRG.11642.3 : Tifa : Q5XI89            | 0.42  | yes | down | 9.5E-05 | yes | chr2  | exon     | internal exon   | NA  | 1.51 | no  | up   | 0.08 | no  | 1.16 | no  | up   | 2.8E-04 | yes |
| ENSRNOT00000092388 : Shank3 : A0A0U1RS13 | 3.23  | yes | up   | 4.3E-05 | yes | chr7  | exon     | first exon      | NA  | 1.06 | no  | up   | 0.15 | no  | 0.98 | no  | down | 1.0E-02 | yes |
| MSTRG.20878.2 : Glis : P13264            | 0.05  | yes | down | 1.5E-13 | yes | chr9  | intron   | first intron    | NA  | 0.96 | no  | down | 0.95 | no  | 1.08 | no  | up   | 4.1E-02 | yes |
| MSTRG.18557.7 : Mon2 : D3ZCG3            | 0.07  | yes | down | 1.5E-08 | yes | chr7  | intron   | internal intron | NA  | 2.62 | yes | up   | 0.21 | no  | 1.05 | no  | up   | 7.1E-07 | yes |
| MSTRG.7470.11 : Acin1 : E9PST5           | 0.30  | yes | down | 1.1E-04 | yes | chr15 | promoter | Distal          | LCP | 1.12 | no  | up   | 0.76 | no  | 0.98 | no  | down | 5.1E-04 | yes |
| MSTRG.16080.1 : Cachd1 : D4ADK4          | 1.98  | yes | up   | 2.7E-04 | yes | chr5  | intron   | internal intron | NA  | 0.86 | no  | down | 0.26 | no  | 0.99 | no  | down | 6.0E-01 | no  |
| MSTRG.18495.1 : Tbc1d15 : F7EZ89         | 0     | yes | down | 1.6E-05 | yes | chr7  | exon     | internal exon   | NA  | 1.07 | no  | up   | 0.73 | no  | 0.98 | no  | down | 2.3E-02 | yes |
| MSTRG.21604.2 : Tbl1x : B2RZA6           | 0     | yes | down | 6.0E-05 | yes | chrX  | intron   | internal intron | NA  | 0.84 | no  | down | 0.45 | no  | 1.12 | no  | up   | 7.8E-09 | yes |
| MSTRG.16636.4 : Ubr4 : A0A0G2JU89        | 2.84  | yes | up   | 3.7E-05 | yes | chr5  | intron   | internal intron | NA  | 0.58 | no  | down | 0.41 | no  | 1.02 | no  | up   | 4.6E-05 | yes |
| MSTRG.2433.1 : Rnls : Q5U2W9             | 0.31  | yes | down | 2.4E-05 | yes | chr1  | promoter | Distal          | LCP | 0.73 | no  | down | 0.32 | no  | 1.02 | no  | up   | 3.0E-01 | no  |
| MSTRG.4525.4 : Mx1 : Q499S4              | 3.65  | yes | up   | 1.1E-13 | yes | chr11 | intron   | internal intron | NA  | 0.90 | no  | down | 0.42 | no  | 1.36 | yes | up   | 1.2E-13 | yes |
| ENSRNOT00000086694 : Aff1 : D3ZBU5       | 1.49  | yes | up   | 9.8E-06 |     |       |          |                 |     |      |     |      |      |     |      |     |      |         |     |

|                                           |       |     |      |         |     |       |          |                 |     |      |     |      |      |     |      |     |      |         |     |
|-------------------------------------------|-------|-----|------|---------|-----|-------|----------|-----------------|-----|------|-----|------|------|-----|------|-----|------|---------|-----|
| MSTRG.19963.6 : Sltm : A0A0G2K904         | 0.34  | yes | down | 6.4E-06 | yes | chr8  | intron   | internal intron | NA  | 0.83 | no  | down | 0.62 | no  | 0.94 | no  | down | 2.8E-02 | yes |
| ENSRNOT00000092936 : Clasp1 : F1LNR1      | 0.36  | yes | down | 6.7E-07 | yes | chr13 | intron   | internal intron | NA  | 1.00 | no  | down | 0.87 | no  | 1.00 | no  | down | 7.0E-01 | no  |
| MSTRG.19125.4 : Brd1 : D3ZUW8             | 7.17  | yes | up   | 3.3E-04 | yes | chr7  | exon     | internal exon   | NA  | 0.81 | no  | down | 0.83 | no  | 1.21 | yes | up   | 6.4E-02 | no  |
| ENSRNOT00000082138 : Ubr4 : A0A0G2JU89    | 2.84  | yes | up   | 3.7E-05 | yes | chr5  | intron   | internal intron | NA  | 2.69 | yes | up   | 0.14 | no  | 1.02 | no  | up   | 4.6E-05 | yes |
| MSTRG.14024.1 : Gnas : P63095             | 0.77  | yes | down | 3.7E-04 | yes | chr3  | promoter | Distal          | HCP | 1.12 | no  | up   | 0.20 | no  | 0.90 | no  | down | 5.6E-15 | yes |
| MSTRG.16753.1 : Pex14 : Q642G4            | 2.11  | yes | up   | 2.4E-04 | yes | chr5  | intron   | internal intron | NA  | 1.95 | no  | up   | 0.10 | no  | 1.04 | no  | up   | 2.1E-03 | yes |
| MSTRG.3895.7 : Cdk12 : A0A0G2K5U7         | 5.94  | yes | up   | 1.1E-04 | yes | chr10 | exon     | first exon      | NA  | 1.22 | no  | up   | 0.41 | no  | 0.97 | no  | down | 5.5E-04 | yes |
| MSTRG.13067.2 : Scrn3 : A0A0G2K189        | 9.14  | yes | up   | 1.0E-04 | yes | chr3  | intron   | first intron    | NA  | 1.65 | no  | up   | 0.29 | no  | 0.92 | no  | down | 8.4E-04 | yes |
| MSTRG.7470.18 : Acin1 : E9PST5            | 0.30  | yes | down | 1.1E-04 | yes | chr15 | promoter | Distal          | LCP | 0.78 | no  | down | 0.28 | no  | 0.98 | no  | down | 5.1E-04 | yes |
| MSTRG.21176.12 : Inpp5d : F1M981          | 0.08  | yes | down | 9.9E-05 | yes | chr9  | intron   | internal intron | NA  | 0.77 | no  | down | 0.27 | no  | 1.08 | no  | up   | 3.1E-05 | yes |
| MSTRG.11263.6 : Atp8b2 : D4A509           | 0.14  | yes | down | 3.1E-04 | yes | chr2  | exon     | first exon      | NA  | 0.95 | no  | down | 0.81 | no  | 0.92 | no  | down | 5.0E-03 | yes |
| ENSRNOT00000002180 : Ltn1 : F1M9Q3        | 0.38  | yes | down | 4.2E-04 | yes | chr11 | intron   | internal intron | NA  | 2.64 | yes | up   | 0.12 | no  | 1.08 | no  | up   | 1.4E-11 | yes |
| MSTRG.7229.2 : Usp54 : Q6IE24             | 0.36  | yes | down | 1.9E-04 | yes | chr15 | intron   | internal intron | NA  | 0.40 | yes | down | 0.50 | no  | 0.83 | yes | down | 7.0E-09 | yes |
| ENSRNOT00000076558 : Neb1 : F1LVX3        | 0     | yes | down | 3.8E-04 | yes | chr17 | intron   | first intron    | NA  | 1.01 | no  | up   | 0.48 | no  | 1.02 | no  | up   | 2.0E-01 | no  |
| MSTRG.19220.7 : Kmt2d : A0A0G2JVD6        | 6.53  | yes | up   | 2.1E-09 | yes | chr7  | exon     | last exon       | NA  | 1.25 | no  | up   | 0.80 | no  | 1.03 | no  | up   | 3.5E-02 | yes |
| ENSRNOT00000083855 : RGD1310507 : A0A0G2K | 10.49 | yes | up   | 4.2E-04 | yes | chr8  | intron   | internal intron | NA  | 0.72 | no  | down | 0.21 | no  | 1.03 | no  | up   | 1.5E-02 | yes |
| MSTRG.13391.1 : Lrrc57 : Q5FVI3           | 0.39  | yes | down | 6.1E-06 | yes | chr3  | intron   | internal intron | NA  | 1.04 | no  | up   | 0.92 | no  | 0.91 | no  | down | 5.9E-09 | yes |
| ENSRNOT00000065950 : Ppp6r3 : D3ZBT9      | 3.21  | yes | up   | 8.1E-07 | yes | chr1  | intron   | internal intron | NA  | 1.07 | no  | up   | 0.11 | no  | 0.98 | no  | down | 7.0E-03 | yes |
| MSTRG.6713.2 : Fryl : D3ZQY4              | 2.76  | yes | up   | 1.7E-04 | yes | chr14 | intron   | internal intron | NA  | 0.69 | no  | down | 0.09 | no  | 1.00 | no  | down | 4.6E-01 | no  |
| ENSRNOT00000045628 : Tf : P12346          | 5.10  | yes | up   | 5.5E-06 | yes | chr8  | intron   | first intron    | NA  | 1.34 | no  | up   | 0.46 | no  | 1.33 | yes | up   | 1.6E-08 | yes |
| MSTRG.20764.1 : Uggt1 : Q9JLA3            | 0.22  | yes | down | 3.9E-04 | yes | chr9  | intron   | internal intron | NA  | 2.04 | yes | up   | 0.45 | no  | 1.11 | no  | up   | 9.8E-15 | yes |
| ENSRNOT00000045180 : Ce2d1a : Q66HA5      | 0.21  | yes | down | 1.7E-05 | yes | chr19 | promoter | Distal          | LCP | 1.01 | no  | up   | 0.85 | no  | 0.96 | no  | down | 4.1E-02 | yes |
| MSTRG.123.4 : Epb41l2 : D3ZM69            | 0.25  | yes | down | 1.1E-12 | yes | chr1  | intron   | internal intron | NA  | 2.19 | yes | up   | 0.07 | no  | 0.91 | no  | down | 8.9E-11 | yes |
| ENSRNOT00000017749 : Cfh : F1M983         | 0.20  | yes | down | 2.4E-04 | yes | chr13 | intron   | internal intron | NA  | 1.46 | no  | up   | 0.09 | no  | 1.20 | no  | up   | 2.7E-15 | yes |
| MSTRG.11607.2 : Bcar3 : D3ZAZ5            | 3.50  | yes | up   | 1.2E-08 | yes | chr2  | intron   | internal intron | NA  | 0.76 | no  | down | 0.19 | no  | 1.06 | no  | up   | 1.2E-02 | yes |
| ENSRNOT00000013232 : Grip2 : A0A0H2UHH8   | 2.18  | yes | up   | 2.2E-05 | yes | chr4  | intron   | internal intron | NA  | 0.91 | no  | down | 0.74 | no  | 1.01 | no  | up   | 5.2E-01 | no  |
| ENSRNOT00000092872 : Aox1 : F1LRQ1        | 0.36  | yes | down | 1.5E-07 | yes | chr9  | intron   | internal intron | NA  | 1.00 | no  | down | 0.60 | no  | 0.73 | yes | down | 3.5E-17 | yes |
| ENSRNOT00000050832 : Synm : G3V9G5        | 1.68  | yes | up   | 3.0E-04 | yes | chr1  | exon     | last exon       | NA  | 1.24 | no  | up   | 0.44 | no  | 0.82 | yes | down | 8.8E-13 | yes |
| MSTRG.6480.2 : Evi5 : D3ZJN9              | 4.04  | yes | up   | 4.0E-04 | yes | chr14 | intron   | internal intron | NA  | 0.28 | yes | down | 0.20 | no  | 0.98 | no  | down | 2.5E-01 | no  |
| MSTRG.3249.11 : Specc1 : A0A0G2K5D7       | 5.53  | yes | up   | 1.9E-10 | yes | chr10 | exon     | last exon       | NA  | 0.69 | no  | down | 0.28 | no  | 0.93 | no  | down | 4.4E-09 | yes |
| ENSRNOT00000008337 : Aco1 : G3V6S2        | 4.49  | yes | up   | 2.7E-06 | yes | chr5  | intron   | internal intron | NA  | 1.44 | no  | up   | 0.25 | no  | 0.93 | no  | down | 1.1E-11 | yes |
| ENSRNOT00000008035 : Oxsm : G3V6R7        | 7.88  | yes | up   | 2.7E-09 | yes | chr15 | exon     | last exon       | NA  | 1.01 | no  | up   | 0.94 | no  | 1.01 | no  | up   | 5.6E-01 | no  |
| MSTRG.7098.1 : Egfr : E7CXR8              | 0.25  | yes | down | 9.1E-09 | yes | chr14 | exon     | internal exon   | NA  | 0.94 | no  | down | 0.80 | no  | 0.99 | no  | down | 2.7E-01 | no  |
| ENSRNOT00000044896 : Ephb3 : D3ZH39       | 1.63  | yes | up   | 6.2E-06 | yes | chr11 | intron   | internal intron | NA  | 0.95 | no  | down | 0.25 | no  | 0.86 | no  | down | 1.2E-07 | yes |
| MSTRG.10603.4 : Nnt : Q5BJZ3              | 3.00  | yes | up   | 1.8E-04 | yes | chr2  | intron   | internal intron | NA  | 1.04 | no  | up   | 0.85 | no  | 0.96 | no  | down | 1.2E-07 | yes |
| ENSRNOT00000024933 : Ampd3 : O09178       | 0.39  | yes | down | 3.1E-04 | yes | chr1  | intron   | internal intron | NA  | 0.88 | no  | down | 0.74 | no  | 0.94 | no  | down | 8.5E-03 | yes |
| MSTRG.20655.1 : Cdc5l : O08837            | 4.40  | yes | up   | 1.7E-04 | yes | chr9  | intron   | internal intron | NA  | 1.32 | no  | up   | 0.23 | no  | 1.05 | no  | up   | 3.5E-05 | yes |
| MSTRG.4937.2 : Gp1bb : Q9JJM7             | 0     | yes | down | 2.2E-04 | yes | chr11 | intron   | internal intron | NA  | 1.18 | no  | up   | 0.40 | no  | 0.93 | no  | down | 7.7E-08 | yes |
| MSTRG.12240.1 : Bicc1 : A0A0G2K0Y0        | 5.19  | yes | up   | 5.0E-04 | yes | chr20 | intron   | internal intron | NA  | 3.74 | yes | up   | 0.13 | no  | 1.52 | yes | up   | 1.2E-05 | yes |
| MSTRG.4866.1 : Vps8 : D4A5F7              | 7.39  | yes | up   | 3.4E-05 | yes | chr11 | intron   | internal intron | NA  | 1.17 | no  | up   | 0.50 | no  | 0.95 | no  | down | 3.2E-03 | yes |
| ENSRNOT00000043646 : Itpr1 : A0A0A0MY31   | 3.16  | yes | up   | 1.1E-05 | yes | chr4  | intron   | internal intron | NA  | 2.46 | yes | up   | 0.37 | no  | 0.87 | no  | down | 1.1E-14 | yes |
| MSTRG.8598.1 : Sfxn1 : Q6AYS2             | 0.56  | yes | down | 3.6E-04 | yes | chr17 | intron   | internal intron | NA  | 3.09 | yes | up   | 0.01 | yes | 1.09 | no  | up   | 2.5E-03 | yes |
| MSTRG.21367.2 : Uba1 : Q5U300             | 0     | yes | down | 1.9E-08 | yes | chrX  | exon     | last exon       | NA  | 1.05 | no  | up   | 0.40 | no  | 0.93 | no  | down | 2.8E-14 | yes |
| MSTRG.16557.3 : Srrml1 : B2RYB3           | 2.05  | yes | up   | 2.0E-04 | yes | chr5  | intron   | internal intron | NA  | 2.30 | yes | up   | 0.04 | yes | 1.10 | no  | up   | 2.8E-06 | yes |
| MSTRG.17811.2 : Mark3 : F1M836            | 0.30  | yes | down | 2.6E-04 | yes | chr6  | exon     | last exon       | NA  | 0.90 | no  | down | 0.68 | no  | 1.10 | no  | up   | 4.1E-07 | yes |
| MSTRG.5467.2 : Stx2 : Q7TS57              | 4.45  | yes | up   | 6.0E-04 | yes | chr12 | exon     | last exon       | NA  | 1.40 | no  | up   | 0.07 | no  | 0.91 | no  | down | 2.6E-04 | yes |
| MSTRG.6568.3 : Antxr2 : Q00IM8            | 1.10  | no  | up   | 9.8E-05 | yes | chr14 | intron   | internal intron | NA  | 0.72 | no  | down | 0.39 | no  | 1.01 | no  | up   | 3.8E-01 | no  |
| ENSRNOT00000076113 : Asph : A0A096MKE0    | 2.56  | yes | up   | 9.8E-06 | yes | chr5  | intron   | internal intron | NA  | 1.30 | no  | up   | 0.02 | yes | 0.99 | no  | down | 1.3E-01 | no  |
| MSTRG.8278.33 : Rbpms : F2Z3S5            | 0.02  | yes | down | 2.6E-05 | yes | chr16 | promoter | Proximal        | ICP | 0.99 | no  | down | 0.35 | no  | 1.06 | no  | up   | 4.9E-05 | yes |
| MSTRG.13954.2 : Znfx1 : F1LMA9            | 20.79 | yes | up   | 3.0E-04 | yes | chr3  | intron   | internal intron | NA  | 1.62 | no  | up   | 0.48 | no  | 0.92 | no  | down | 1.0E-03 | yes |
| MSTRG.15546.3 : Asph : A0A096MKE0         | 2.56  | yes | up   | 9.8E-06 | yes | chr5  | intron   | internal intron | NA  | 0.65 | no  | down | 0.36 | no  | 0.99 | no  | down | 1.3E-01 | no  |
| ENSRNOT00000035590 : Hydin : D3ZBX6       | 3.95  | yes | up   | 2.0E-07 | yes | chr19 | intron   | internal intron | NA  | 0.95 | no  | down | 0.51 | no  | 0.80 | yes | down | 2.3E-10 | yes |
| MSTRG.16327.14 : Macf1 : A0A0G2K9T4       | 0.36  | yes | down | 1.3E-05 | yes | chr5  | exon     | last exon       | NA  | 1.16 | no  | up   | 0.82 | no  | 0.97 | no  | down | 9.0E-11 | yes |
| MSTRG.323.6 : LOC108348175 : A0A0G2JUS0   | 0.05  | yes | down | 4.0E-19 | yes | chr1  | promoter | Intermediate    | LCP | 1.18 | no  | up   | 0.67 | no  | 1.01 | no  | up   | 4.0E-01 | no  |
| ENSRNOT00000090923 : Lims2 : A0A0G2KAE1   | 0.67  | yes | down | 6.6E-13 | yes | chr18 | intron   | internal intron | NA  | 0.60 | no  | down | 0.17 | no  | 0.82 | yes | down | 4.4E-10 | yes |
| MSTRG.7482.1 : Pabpn1 : G3V7Z8            | 0.52  | yes | down | 3.9E-04 | yes | chr15 | intron   | last intron     | NA  | 0.91 | no  | down | 0.42 | no  | 1.02 | no  | up   | 3.4E-02 | yes |
| ENSRNOT00000016084 : RGD1307929 : F1LSX1  | 7.34  | yes | up   | 1.1E-12 | yes | chr10 | intron   | internal intron | NA  | 2.08 | yes | up   | 0.02 | yes | 0.97 | no  | down | 1.8E-04 | yes |
| MSTRG.611.1 : Apoe : P02651               | 0.23  | yes | down | 3.2E-04 | yes | chr1  | exon     | last exon       | NA  | 1.22 | no  | up   | 0.70 | no  | 0.86 | no  | down | 6.2E-12 | yes |
| ENSRNOT00000005987 : Cltc : F1M779        | 0.27  | yes | down | 1.4E-04 | yes | chr10 | intron   | internal intron | NA  | 1.30 | no  | up   | 0.04 | yes | 1.04 | no  | up   | 1.3E-11 | yes |
| MSTRG.8278.24 : Rbpms : F2Z3S5            | 0.02  | yes | down | 2.6E-05 | yes | chr16 | promoter | Proximal        | ICP | 1.07 | no  | up   | 0.72 | no  | 1.06 | no  | up   | 4.9E-05 | yes |
| MSTRG.4725.10 : Kalrn : P97924            | 1.54  | yes | up   | 9.1E-07 | yes | chr11 | exon     | last exon       | NA  | 0.69 | no  | down | 0.03 | yes | 1.04 | no  | up   | 1.6E-04 | yes |
| MSTRG.6211.2 : Fcgr2b : A3RLA8            | 0.44  | yes | down | 2.8E-04 | yes | chr13 | promoter | Distal          | LCP | 1.26 | no  | up   | 0.46 | no  | 1.04 | no  | up   | 4.3E-03 | yes |
| MSTRG.7179.1 : Ccdc88a : D3ZYD7           | 6.58  | yes | up   | 8.2E-05 | yes | chr14 | promoter | Distal          | LCP | 1.02 | no  | up   | 0.98 | no  | 1.03 | no  | up   | 5.3E-03 | yes |
| MSTRG.15361.2 : Recql : Q6AYJ1            | 0.74  | yes | down | 1.2E-04 | yes | chr4  | exon     | last exon       | NA  | 1.07 | no  | up   | 0.85 | no  | 0.97 | no  | down | 6.1E-03 | yes |
| ENSRNOT00000000717 : Rp12 : B0BN82        | 0.50  | yes | down | 5.1E-06 | yes | chr20 | intron   | internal intron | NA  | 1.19 | no  | up   | 0.13 | no  | 0.96 | no  | down | 2.2E-02 | yes |
| ENSRNOT00000005262 : Cpd : A0A0G2JY30     | 0.15  | yes | down | 4.3E-04 | yes | chr10 | intron   | internal intron | NA  | 1.16 | no  | up   | 0.36 | no  | 1.13 | no  | up   | 1.1E-08 | yes |
| MSTRG.10322.1 : Cast : F1LPH1             | 0.36  | yes | down | 1.6E-06 | yes | chr2  | intron   | internal intron | NA  | 4.41 | yes | up   | 0.17 | no  | 0.95 | no  | down | 2.4E-10 | yes |
| MSTRG.20817.7 : Map4k4 : A0A0G2K7W4       | 0.36  | yes | down | 7.1E-05 | yes | chr9  | intron   | internal intron | NA  | 1.30 | no  | up   | 0.46 | no  | 1.10 | no  | up   | 7.1E-06 | yes |
| ENSRNOT000000024576 : Abhd17a : Q5XIJ5    | 3.11  | yes | up   | 7.4E-06 | yes | chr7  | exon     | internal exon   | NA  | 0.93 | no  | down | 0.58 | no  | 0.84 | no  | down | 6.6E-10 | yes |
| ENSRNOT000000064043 : Tmem245 : D3ZXD8    | 5.92  | yes | up   | 3.2E-05 | yes | chr5  | intron   | internal intron | NA  | 0.88 | no  | down | 0.69 | no  | 0.88 | no  | down | 4.0E-07 | yes |
| MSTRG.2881.6 : Pkd1 : Q9ERV0              | inf   | yes | up   | 6.6E-05 | yes | chr10 | intron   | internal intron | NA  | 2.03 |     |      |      |     |      |     |      |         |     |

|                                           |       |     |      |         |     |       |          |                 |     |      |     |        |      |     |      |     |      |         |     |
|-------------------------------------------|-------|-----|------|---------|-----|-------|----------|-----------------|-----|------|-----|--------|------|-----|------|-----|------|---------|-----|
| MSTRG.15720.2 : Pigo : D3ZTP8             | 0.61  | yes | down | 2.7E-05 | yes | chr5  | exon     | internal exon   | NA  | 0.55 | no  | down   | 0.31 | no  | 0.80 | yes | down | 9.0E-03 | yes |
| MSTRG.3379.4 : Dlg4 : P31016              | 2.15  | yes | up   | 8.6E-07 | yes | chr10 | intron   | last intron     | NA  | 1.18 | no  | up     | 0.49 | no  | 0.97 | no  | down | 9.1E-02 | no  |
| MSTRG.11405.7 : Pde4dip : A0A0G2JW66      | 6.94  | yes | up   | 5.0E-08 | yes | chr2  | exon     | internal exon   | NA  | 0.95 | no  | down   | 0.26 | no  | 1.06 | no  | up   | 5.1E-04 | yes |
| MSTRG.323.2 : LOC108348175 : A0A0G2JUS0   | 0.05  | yes | down | 4.0E-19 | yes | chr1  | promoter | Intermediate    | LCP | 1.00 | no  | down   | 0.35 | no  | 1.01 | no  | up   | 4.0E-01 | no  |
| MSTRG.4508.5 : Dyrk1a : Q63470            | 0.26  | yes | down | 2.2E-05 | yes | chr11 | intron   | internal intron | NA  | 1.51 | no  | up     | 0.48 | no  | 1.02 | no  | up   | 1.6E-01 | no  |
| MSTRG.19538.12 : Nfrkb : D4A421           | 0.58  | yes | down | 1.3E-05 | yes | chr8  | intron   | internal intron | NA  | 1.31 | no  | up     | 0.09 | no  | 0.89 | no  | down | 2.5E-03 | yes |
| MSTRG.6320.6 : Cdc42bpa : G3V6C9          | 8.92  | yes | up   | 2.1E-05 | yes | chr13 | intron   | internal intron | NA  | 0.57 | no  | down   | 0.50 | no  | 0.97 | no  | down | 2.5E-04 | yes |
| MSTRG.4992.5 : Top3b : D4A9Z2             | 11.41 | yes | up   | 1.2E-04 | yes | chr11 | intron   | last intron     | NA  | 0.71 | no  | down   | 0.38 | no  | 0.99 | no  | down | 6.1E-01 | no  |
| MSTRG.3353.3 : Zbtb4 : D4A8X0             | inf   | yes | up   | 2.4E-05 | yes | chr10 | intron   | last intron     | NA  | 0.53 | no  | down   | 0.21 | no  | 0.97 | no  | down | 6.9E-02 | no  |
| MSTRG.21083.14 : Speg : Q63638            | 0.17  | yes | down | 2.6E-06 | yes | chr9  | intron   | internal intron | NA  | 0.75 | no  | down   | 0.00 | yes | 0.88 | no  | down | 2.3E-07 | yes |
| ENSRNOT00000060311 : Tcp1111 : F1M9Y7     | 3.13  | yes | up   | 1.2E-06 | yes | chr3  | intron   | last intron     | NA  | 1.00 | no  | down   | 0.47 | no  | 0.99 | no  | down | 8.5E-01 | no  |
| ENSRNOT00000031812 : Dmxl1 : D4AA13       | 0.19  | yes | down | 1.3E-04 | yes | chr18 | intron   | internal intron | NA  | 0.95 | no  | down   | 0.88 | no  | 0.95 | no  | down | 3.8E-03 | yes |
| MSTRG.21491.3 : Phf8 : D4AD31             | 0     | yes | down | 2.1E-07 | yes | chrX  | exon     | first exon      | NA  | 1.00 | no  | down   | 0.47 | no  | 1.13 | no  | up   | 3.6E-02 | yes |
| MSTRG.12274.1 : Ctnna3 : B2RYN9           | 0     | yes | down | 1.3E-06 | yes | chr20 | promoter | Distal          | LCP | 0.77 | no  | down   | 0.44 | no  | 1.03 | no  | up   | 1.7E-01 | no  |
| MSTRG.7804.4 : Mycbp2 : D4A2D3            | 0.31  | yes | down | 9.2E-06 | yes | chr15 | intron   | internal intron | NA  | 1.12 | no  | up     | 0.47 | no  | 1.00 | no  | up   | 6.8E-01 | no  |
| MSTRG.18268.26 : Akap8 : Q63014           | 0.08  | yes | down | 2.7E-04 | yes | chr7  | intron   | internal intron | NA  | 0.75 | no  | down   | 0.72 | no  | 0.99 | no  | down | 2.8E-01 | no  |
| ENSRNOT00000029615 : Usp54 : Q61E24       | 0.36  | yes | down | 1.9E-04 | yes | chr15 | intron   | internal intron | NA  | 1.55 | no  | up     | 0.61 | no  | 0.83 | yes | down | 7.0E-09 | yes |
| MSTRG.16327.6 : Macf1 : A0A0G2K9T4        | 0.36  | yes | down | 1.3E-05 | yes | chr5  | exon     | last exon       | NA  | 1.19 | no  | up     | 0.78 | no  | 0.97 | no  | down | 9.0E-11 | yes |
| ENSRNOT00000078909 : Plcg1 : G3V845       | 0.24  | yes | down | 1.1E-04 | yes | chr3  | intron   | first intron    | NA  | 1.20 | no  | up     | 0.44 | no  | 0.94 | no  | down | 1.8E-09 | yes |
| MSTRG.5614.1 : Tbx3 : A0A0G2K8D7          | 2.83  | yes | up   | 2.0E-10 | yes | chr12 | intron   | internal intron | NA  | 1.27 | no  | up     | 0.24 | no  | 0.99 | no  | down | 7.3E-01 | no  |
| ENSRNOT00000037164 : Nup214 : D4ACK1      | 0.13  | yes | down | 4.7E-04 | yes | chr3  | intron   | internal intron | NA  | 0.89 | no  | down   | 0.45 | no  | 0.99 | no  | down | 6.9E-01 | no  |
| ENSRNOT00000013126 : Sbf2 : B5DEJ9        | 4.77  | yes | up   | 8.9E-06 | yes | chr1  | intron   | internal intron | NA  | 0.94 | no  | down   | 0.42 | no  | 1.03 | no  | up   | 9.5E-02 | no  |
| ENSRNOT00000084660 : Ctnna3 : B2RYN9      | 0     | yes | down | 1.3E-06 | yes | chr20 | promoter | Distal          | LCP | 1.09 | no  | up     | 0.69 | no  | 1.03 | no  | up   | 1.7E-01 | no  |
| ENSRNOT00000092857 : Trim21 : D4ACF2      | 0.20  | yes | down | 5.7E-10 | yes | chr1  | promoter | Distal          | LCP | 1.00 | no  | down   | 0.68 | no  | 0.96 | no  | down | 1.3E-04 | yes |
| MSTRG.7780.4 : Lmo7 : A0A0G2K174          | 3.35  | yes | up   | 1.2E-04 | yes | chr15 | intron   | internal intron | NA  | 0.44 | yes | down   | 0.29 | no  | 0.96 | no  | down | 4.2E-06 | yes |
| MSTRG.6327.2 : Acbd3 : G3V6E4             | 2.42  | yes | up   | 1.4E-04 | yes | chr13 | intron   | internal intron | NA  | 0.86 | no  | down   | 0.69 | no  | 1.07 | no  | up   | 2.4E-14 | yes |
| ENSRNOT00000010947 : Dnm2 : A0A0A0MY48    | 0.11  | yes | down | 8.9E-11 | yes | chr8  | intron   | first intron    | NA  | 1.05 | no  | up     | 0.54 | no  | 1.05 | no  | up   | 2.0E-08 | yes |
| MSTRG.16755.4 : Kif1b : A0A0G2KA12        | 3.65  | yes | up   | 7.4E-05 | yes | chr5  | intron   | internal intron | NA  | 0.86 | no  | down   | 0.87 | no  | 1.05 | no  | up   | 6.5E-02 | no  |
| MSTRG.6480.6 : Evi5 : D3ZJN9              | 4.04  | yes | up   | 4.0E-04 | yes | chr14 | intron   | internal intron | NA  | 1.53 | no  | up     | 0.09 | no  | 0.98 | no  | down | 2.5E-01 | no  |
| ENSRNOT00000092975 : Dnajc11 : B1WBV5     | 2.59  | yes | up   | 1.9E-14 | yes | chr5  | promoter | Intermediate    | ICP | 1.49 | no  | up     | 0.03 | yes | 0.88 | no  | down | 4.2E-12 | yes |
| MSTRG.20422.1 : Rpl14 : Q63507            | 6.79  | yes | up   | 7.4E-07 | yes | chr8  | intron   | internal intron | NA  | 0.90 | no  | down   | 0.59 | no  | 1.09 | no  | up   | 1.1E-04 | yes |
| MSTRG.123.3 : Epb412 : D3ZM69             | 0.25  | yes | down | 1.1E-12 | yes | chr1  | intron   | internal intron | NA  | 1.05 | no  | up     | 0.32 | no  | 0.91 | no  | down | 8.9E-11 | yes |
| MSTRG.13952.3 : Stau1 : Q9ESY8            | 0.08  | yes | down | 6.3E-05 | yes | chr3  | intron   | internal intron | NA  | 0.99 | no  | down   | 0.97 | no  | 1.05 | no  | up   | 2.2E-05 | yes |
| ENSRNOT00000067907 : Tbc1d15 : F7EZ89     | 0     | yes | down | 1.6E-05 | yes | chr7  | exon     | internal exon   | NA  | 1.12 | no  | up     | 0.69 | no  | 0.98 | no  | down | 2.3E-02 | yes |
| ENSRNOT00000006884 : Rtf1dc1 : Q3T1J8     | 0     | yes | down | 2.5E-04 | yes | chr3  | exon     | internal exon   | NA  | 1.00 | no  | down   | 0.92 | no  | 1.01 | no  | up   | 3.6E-01 | no  |
| MSTRG.13559.4 : Hspa12b : D3ZVM5          | 0.65  | yes | down | 3.5E-04 | yes | chr3  | intron   | last intron     | NA  | 0.75 | no  | down   | 0.15 | no  | 0.86 | no  | down | 5.9E-13 | yes |
| ENSRNOT00000048528 : Pitpnm2 : A0A0G2JW50 | 2.70  | yes | up   | 3.9E-04 | yes | chr12 | promoter | Distal          | LCP | 1.06 | no  | up     | 0.35 | no  | 0.89 | no  | down | 1.9E-08 | yes |
| MSTRG.15309.1 : Mancel1 : D4AE21          | 0.45  | yes | down | 1.5E-04 | yes | chr4  | exon     | first exon      | NA  | 1.28 | no  | up     | 0.57 | no  | 0.85 | no  | down | 5.3E-06 | yes |
| ENSRNOT00000090870 : Mitf1 : Q510J5       | 0.26  | yes | down | 9.9E-05 | yes | chr9  | promoter | Intermediate    | LCP | 1.12 | no  | up     | 0.12 | no  | 1.14 | no  | up   | 9.0E-08 | yes |
| MSTRG.10569.4 : Plpp1 : O08564            | 0.47  | yes | down | 8.3E-05 | yes | chr2  | intron   | internal intron | NA  | 1.04 | no  | up     | 0.90 | no  | 1.04 | no  | up   | 2.9E-03 | yes |
| MSTRG.7804.2 : Mycbp2 : A0A1W2Q6I3        | 0.31  | yes | down | 9.2E-06 | yes | chr15 | intron   | internal intron | NA  | 1.07 | no  | up     | 0.82 | no  | 1.00 | no  | up   | 8.8E-01 | no  |
| MSTRG.14349.1 : Cped1 : A0A0G2QC10        | 1.61  | yes | up   | 4.5E-04 | yes | chr4  | intron   | internal intron | NA  | 1.24 | no  | up     | 0.72 | no  | 1.07 | no  | up   | 1.5E-03 | yes |
| ENSRNOT00000051846 : Cacna1c : F1MA84     | 4.75  | yes | up   | 4.3E-04 | yes | chr4  | intron   | internal intron | NA  | 1.00 | no  | down   | 0.88 | no  | 0.97 | no  | down | 2.7E-02 | yes |
| ENSRNOT00000068018 : Lnpk : A0JN29        | 3.42  | yes | up   | 1.2E-11 | yes | chr3  | intron   | internal intron | NA  | 1.19 | no  | up     | 0.36 | no  | 0.96 | no  | down | 2.6E-04 | yes |
| MSTRG.7186.3 : Spbn1 : A0A0G2K8W9         | 5.72  | yes | up   | 4.0E-04 | yes | chr14 | intron   | internal intron | NA  | 2.74 | yes | up     | 0.49 | no  | 0.87 | no  | down | 1.1E-18 | yes |
| MSTRG.10322.2 : Cast : F1LPH1             | 0.36  | yes | down | 1.6E-06 | yes | chr2  | intron   | internal intron | NA  | 1.18 | no  | up     | 0.50 | no  | 0.95 | no  | down | 2.4E-10 | yes |
| MSTRG.13195.2 : Arhgap1 : D4A6C5          | 3.73  | yes | up   | 1.8E-11 | yes | chr3  | intron   | internal intron | NA  | 1.11 | no  | up     | 0.84 | no  | 1.04 | no  | up   | 1.7E-04 | yes |
| ENSRNOT00000092945 : Picalm : Q66SY1      | 8.74  | yes | up   | 2.1E-13 | yes | chr1  | intron   | internal intron | NA  | 0.63 | no  | down   | 0.04 | yes | 1.13 | no  | up   | 1.1E-06 | yes |
| ENSRNOT00000076880 : Slc33a1 : Q6AYY8     | 0.10  | yes | down | 8.7E-08 | yes | chr2  | exon     | last exon       | NA  | 1.08 | no  | up     | 0.63 | no  | 1.05 | no  | up   | 1.4E-05 | yes |
| MSTRG.5034.1 : Insr : F1LPL6              | 0.36  | yes | down | 9.6E-05 | yes | chr12 | intron   | internal intron | NA  | 3.63 | yes | up     | 0.00 | yes | 1.09 | no  | up   | 1.4E-04 | yes |
| MSTRG.19194.3 : Hdac7 : A0A0G2K6B1        | 1.57  | yes | up   | 6.8E-05 | yes | chr7  | intron   | internal intron | NA  | 1.53 | no  | up     | 0.18 | no  | 0.99 | no  | down | 6.7E-01 | no  |
| MSTRG.18268.27 : Akap8 : Q63014           | 0.08  | yes | down | 2.7E-04 | yes | chr7  | intron   | internal intron | NA  | 0.62 | no  | down   | 0.53 | no  | 0.99 | no  | down | 2.8E-01 | no  |
| MSTRG.22089.1 : Htatsf1 : D4A997          | 6.87  | yes | up   | 2.7E-04 | yes | chrX  | promoter | Intermediate    | HCP | 1.13 | no  | up     | 0.84 | no  | 0.95 | no  | down | 9.0E-07 | yes |
| MSTRG.9889.10 : Nflx : F2Z3R4             | 0.58  | yes | down | 1.9E-06 | yes | chr19 | intron   | internal intron | NA  | 1.53 | no  | up     | 0.20 | no  | 0.77 | yes | down | 2.4E-14 | yes |
| MSTRG.20831.5 : Tgfbrap1 : D3ZXT8         | 0.12  | yes | down | 2.5E-04 | yes | chr9  | intron   | internal intron | NA  | 0.75 | no  | down   | 0.50 | no  | 0.98 | no  | down | 2.9E-01 | no  |
| ENSRNOT00000086041 : Gbfl : A0A0G2K3N1    | 0.28  | yes | down | 1.1E-05 | yes | chr1  | intron   | internal intron | NA  | 1.45 | no  | up     | 0.47 | no  | 1.05 | no  | up   | 6.1E-10 | yes |
| ENSRNOT00000093422 : Phf8 : D4AD31        | 0     | yes | down | 2.1E-07 | yes | chrX  | exon     | first exon      | NA  | 0.96 | no  | down   | 0.40 | no  | 1.13 | no  | up   | 3.6E-02 | yes |
| MSTRG.9847.1 : Pkn1 : Q63433              | 1.53  | yes | up   | 6.1E-04 | yes | chr19 | intron   | internal intron | NA  | 0.60 | no  | down   | 0.08 | no  | 1.01 | no  | up   | 5.4E-01 | no  |
| ENSRNOT00000055401 : Dlg2 : F1M907        | 2.35  | yes | up   | 1.4E-05 | yes | chr1  | intron   | internal intron | NA  | 1.05 | no  | up     | 0.56 | no  | 0.92 | no  | down | 2.8E-06 | yes |
| ENSRNOT00000040762 : Plec : Q6S395        | 0.33  | yes | down | 4.2E-06 | yes | chr7  | exon     | last exon       | NA  | 1.05 | no  | up     | 0.87 | no  | 1.03 | no  | up   | 2.2E-01 | no  |
| ENSRNOT00000040762 : Plec : F7F9U6        | 0.33  | yes | down | 4.2E-06 | yes | chr7  | exon     | last exon       | NA  | 1.05 | no  | up     | 0.87 | no  | 0.90 | no  | down | 2.5E-03 | yes |
| MSTRG.7804.7 : Mycbp2 : A0A1W2Q6I3        | 0.31  | yes | down | 9.2E-06 | yes | chr15 | intron   | internal intron | NA  | 0.48 | yes | down   | 0.23 | no  | 1.00 | no  | up   | 8.8E-01 | no  |
| MSTRG.14146.2 : Fam126a : A0A0G2K3C7      | 0.38  | yes | down | 2.9E-04 | yes | chr4  | promoter | Intermediate    | LCP | 1.06 | no  | up     | 0.66 | no  | 1.07 | no  | up   | 1.8E-06 | yes |
| MSTRG.1466.2 : Trim21 : D4ACF2            | 0.20  | yes | down | 5.7E-10 | yes | chr1  | promoter | Distal          | LCP | 0.75 | no  | down   | 0.45 | no  | 0.96 | no  | down | 1.3E-04 | yes |
| MSTRG.21427.1 : Rbm3 : Q925G0             | 5.50  | yes | up   | 1.2E-04 | yes | chrX  | intron   | first intron    | NA  | 0.87 | no  | down   | 0.69 | no  | 1.28 | yes | up   | 1.7E-10 | yes |
| MSTRG.14948.2 : Magi1 : M0R8T1            | 0.38  | yes | down | 2.0E-04 | yes | chr4  | intron   | internal intron | NA  | 1.26 | no  | up     | 0.27 | no  | 0.99 | no  | down | 6.0E-01 | no  |
| ENSRNOT00000036518 : Gst3 : D3Z8I7        | 0.44  | yes | down | 5.4E-04 | yes | chr20 | promoter | Intermediate    | LCP | 0.83 | no  | down   | 0.63 | no  | 0.92 | no  | down | 4.5E-04 | yes |
| MSTRG.7470.1 : Acin1 : E9PST5             | 0.30  | yes | down | 1.1E-04 | yes | chr15 | promoter | Distal          | LCP | 1.08 | no  | up     | 0.46 | no  | 0.98 | no  | down | 5.1E-04 | yes |
| ENSRNOT00000085714 : Mcc : F1LZS6         | 43.12 | yes | up   | 1.3E-14 | yes | chr1  | exon     | last exon       | NA  | 1.39 | no  | up     | 0.19 | no  | 0.85 | no  | down | 3.7E-04 | yes |
| MSTRG.21085.1 : Chpf : Q5XIQ8             | 1.40  | yes | up   | 4.1E-04 | yes | chr9  | intron   | internal intron | NA  | 0.96 | no  | down   | 0.94 | no  | 1.00 | no  | down | 8.4E-01 | no  |
| MSTRG.21938.3 : Khlh13 : F1LM44           | 0.22  | yes | down | 7.1E-07 | yes | chrX  | intron   | last intron     | NA  | 0.87 | no  | down</ |      |     |      |     |      |         |     |

|                                           |       |     |      |         |     |       |          |                 |     |      |     |      |      |     |      |     |      |         |     |
|-------------------------------------------|-------|-----|------|---------|-----|-------|----------|-----------------|-----|------|-----|------|------|-----|------|-----|------|---------|-----|
| MSTRG.2354.1 : Ptar1 : D3ZWG9             | 2.31  | yes | up   | 2.3E-04 | yes | chr1  | exon     | internal exon   | NA  | 1.09 | no  | up   | 0.23 | no  | 0.95 | no  | down | 1.2E-02 | yes |
| MSTRG.21176.4 : Inpp5d : F1M981           | 0.08  | yes | down | 9.9E-05 | yes | chr9  | intron   | internal intron | NA  | 1.05 | no  | up   | 0.29 | no  | 1.08 | no  | up   | 3.1E-05 | yes |
| ENSRNOT00000065576 : Recql : Q6AYJ1       | 0.74  | yes | down | 1.2E-04 | yes | chr4  | exon     | last exon       | NA  | 0.67 | no  | down | 0.69 | no  | 0.97 | no  | down | 6.1E-03 | yes |
| ENSRNOT00000030373 : Nmi : Q498S7         | 0.14  | yes | down | 8.2E-08 | yes | chr3  | exon     | last exon       | NA  | 0.65 | no  | down | 0.28 | no  | 1.02 | no  | up   | 4.1E-02 | yes |
| MSTRG.16755.2 : Kif1b : A0A0G2KA12        | 3.65  | yes | up   | 7.4E-05 | yes | chr5  | intron   | internal intron | NA  | 1.04 | no  | up   | 0.88 | no  | 1.05 | no  | up   | 6.5E-02 | no  |
| ENSRNOT00000083322 : Map4k4 : A0A0G2K7W4  | 0.36  | yes | down | 7.1E-05 | yes | chr9  | intron   | internal intron | NA  | 1.40 | no  | up   | 0.55 | no  | 1.10 | no  | up   | 7.1E-06 | yes |
| MSTRG.1670.1 : Rbbp6 : G3V953             | inf   | yes | up   | 4.6E-05 | yes | chr1  | intron   | internal intron | NA  | 0.92 | no  | down | 0.44 | no  | 1.09 | no  | up   | 2.1E-04 | yes |
| MSTRG.4992.2 : Top3b : D4A9Z2             | 11.41 | yes | up   | 1.2E-04 | yes | chr11 | intron   | last intron     | NA  | 1.08 | no  | up   | 0.94 | no  | 0.99 | no  | down | 6.1E-01 | no  |
| MSTRG.21039.8 : Tns1 : F1LN42             | 0.09  | yes | down | 2.0E-04 | yes | chr9  | intron   | last intron     | NA  | 2.19 | yes | up   | 0.24 | no  | 0.86 | no  | down | 7.8E-19 | yes |
| MSTRG.1443.7 : Arap1 : F1LM60             | 2.71  | yes | up   | 3.3E-04 | yes | chr1  | intron   | first intron    | NA  | 1.25 | no  | up   | 0.67 | no  | 0.99 | no  | down | 2.5E-02 | yes |
| ENSRNOT00000025467 : Tcerg1 : B5DEZ4      | 0.26  | yes | down | 2.8E-04 | yes | chr18 | promoter | Intermediate    | ICP | 1.01 | no  | up   | 0.98 | no  | 1.02 | no  | up   | 4.4E-02 | yes |
| MSTRG.20561.1 : Rftn1 : G3V712            | 3.70  | yes | up   | 2.3E-04 | yes | chr9  | intron   | internal intron | NA  | 0.66 | no  | down | 0.40 | no  | 1.12 | no  | up   | 1.5E-09 | yes |
| ENSRNOT00000092781 : Filip1 : F1LM79      | 4.15  | yes | up   | 2.1E-10 | yes | chr8  | exon     | first exon      | NA  | 1.00 | no  | down | 0.48 | no  | 1.01 | no  | up   | 3.0E-01 | no  |
| MSTRG.19538.15 : Nfrikb : D4A421          | 0.58  | yes | down | 1.3E-05 | yes | chr8  | intron   | internal intron | NA  | 0.67 | no  | down | 0.07 | no  | 0.89 | no  | down | 2.5E-03 | yes |
| ENSRNOT00000083926 : Rpap3 : Q68FQ7       | 0.29  | yes | down | 4.9E-05 | yes | chr7  | intron   | internal intron | NA  | 0.98 | no  | down | 0.91 | no  | 1.04 | no  | up   | 2.9E-04 | yes |
| ENSRNOT00000021171 : Sfxn3 : Q6P6T0       | 0.39  | yes | down | 7.8E-05 | yes | chr1  | intron   | internal intron | NA  | 0.92 | no  | down | 0.57 | no  | 1.12 | no  | up   | 6.4E-07 | yes |
| ENSRNOT00000071929 : Rbpj : M0R7Q3        | 0.34  | yes | down | 7.0E-05 | yes | chr14 | intron   | last intron     | NA  | 0.99 | no  | down | 0.76 | no  | 1.08 | no  | up   | 1.1E-04 | yes |
| MSTRG.751.3 : Timm50 : D3ZJX5             | 0.54  | yes | down | 3.3E-07 | yes | chr1  | exon     | last exon       | NA  | 0.98 | no  | down | 0.97 | no  | 0.98 | no  | down | 4.2E-02 | yes |
| ENSRNOT00000081786 : Btafl : A0A0G2K1N4   | 2.34  | yes | up   | 6.1E-05 | yes | chr1  | intron   | internal intron | NA  | 1.87 | no  | up   | 0.55 | no  | 1.00 | no  | down | 9.8E-01 | no  |
| MSTRG.10218.2 : Zc3h18 : Q6TQE1           | 0.03  | yes | down | 1.2E-11 | yes | chr19 | promoter | Intermediate    | LCP | 1.00 | no  | down | 0.99 | no  | 1.02 | no  | up   | 2.3E-01 | no  |
| MSTRG.7830.1 : Dock9 : F1LSM8             | 0.10  | yes | down | 2.7E-05 | yes | chr15 | intron   | internal intron | NA  | 1.00 | no  | down | 0.45 | no  | 0.97 | no  | down | 2.3E-04 | yes |
| ENSRNOT00000087026 : Pde4dip : A0A0G2JW66 | 6.94  | yes | up   | 5.0E-08 | yes | chr2  | exon     | internal exon   | NA  | 0.68 | no  | down | 0.13 | no  | 1.06 | no  | up   | 5.1E-04 | yes |
| MSTRG.21682.3 : Yipf6 : A0A096MJG6        | inf   | yes | up   | 3.8E-06 | yes | chrX  | intron   | first intron    | NA  | 0.87 | no  | down | 0.70 | no  | 1.03 | no  | up   | 1.9E-01 | no  |
| ENSRNOT00000058497 : Fcgr2b : A3RLA8      | 0.44  | yes | down | 2.8E-04 | yes | chr13 | promoter | Distal          | LCP | 1.18 | no  | up   | 0.65 | no  | 1.04 | no  | up   | 4.3E-03 | yes |
| MSTRG.4335.3 : Pcyt2 : O88637             | 4.82  | yes | up   | 3.0E-05 | yes | chr10 | intron   | last intron     | NA  | 1.50 | no  | up   | 0.25 | no  | 0.94 | no  | down | 1.8E-03 | yes |
| MSTRG.12668.6 : Nup188 : F1LRC6           | 0.22  | yes | down | 2.3E-05 | yes | chr3  | exon     | internal exon   | NA  | 0.90 | no  | down | 0.82 | no  | 1.02 | no  | up   | 1.9E-01 | no  |
| ENSRNOT00000012270 : Sec24c : A0A0G2JZF0  | 3.50  | yes | up   | 1.3E-09 | yes | chr15 | intron   | internal intron | NA  | 1.92 | no  | up   | 0.45 | no  | 1.01 | no  | up   | 2.6E-01 | no  |
| ENSRNOT00000012334 : Col5a1 : G3V763      | 0.33  | yes | down | 4.5E-04 | yes | chr3  | intron   | internal intron | NA  | 0.89 | no  | down | 0.53 | no  | 1.08 | no  | up   | 2.2E-06 | yes |
| ENSRNOT00000061516 : Clasp1 : F1LNR1      | 0.36  | yes | down | 6.7E-07 | yes | chr13 | intron   | internal intron | NA  | 1.04 | no  | up   | 0.48 | no  | 1.00 | no  | down | 7.0E-01 | no  |
| MSTRG.3538.2 : Abr : A0A0G2JZZ7           | inf   | yes | up   | 3.7E-04 | yes | chr10 | intron   | internal intron | NA  | 0.78 | no  | down | 0.51 | no  | 1.05 | no  | up   | 1.0E-03 | yes |
| MSTRG.15356.1 : Pde3a : Q62865            | 0.30  | yes | down | 3.1E-07 | yes | chr4  | intron   | internal intron | NA  | 1.86 | no  | up   | 0.43 | no  | 1.00 | no  | up   | 9.7E-01 | no  |
| ENSRNOT00000085894 : Tpm1 : A0A0G2JSQ4    | 9.41  | yes | up   | 5.1E-14 | yes | chr8  | intron   | internal intron | NA  | 0.26 | yes | down | 0.16 | no  | 0.81 | yes | down | 2.5E-10 | yes |
| MSTRG.8364.1 : Ap3m2 : V9GZ82             | 2.61  | yes | up   | 1.6E-06 | yes | chr16 | intron   | internal intron | NA  | 0.98 | no  | down | 0.72 | no  | 0.97 | no  | down | 9.9E-02 | no  |
| ENSRNOT00000045130 : Mon2 : D3ZCG3        | 0.07  | yes | down | 1.5E-08 | yes | chr7  | intron   | internal intron | NA  | 0.73 | no  | down | 0.66 | no  | 1.05 | no  | up   | 7.1E-07 | yes |
| MSTRG.11797.3 : Cryz : Q6AYT0             | 3.72  | yes | up   | 1.8E-04 | yes | chr2  | intron   | first intron    | NA  | 0.99 | no  | down | 0.77 | no  | 0.91 | no  | down | 9.1E-09 | yes |
| ENSRNOT00000026040 : Ola1 : A0JPJ7        | 3.58  | yes | up   | 9.2E-08 | yes | chr3  | promoter | Proximal        | LCP | 1.08 | no  | up   | 0.60 | no  | 1.04 | no  | up   | 2.3E-07 | yes |
| ENSRNOT00000013355 : Wnk1 : Q9JIH7        | 18.77 | yes | up   | 1.6E-38 | yes | chr4  | exon     | internal exon   | NA  | 1.00 | no  | down | 0.77 | no  | 1.04 | no  | up   | 1.7E-03 | yes |
| ENSRNOT00000009485 : Mien1 : D3ZSU7       | 0     | yes | down | 1.5E-07 | yes | chr10 | exon     | last exon       | NA  | 1.24 | no  | up   | 0.62 | no  | 1.01 | no  | up   | 3.2E-01 | no  |
| MSTRG.2510.1 : Tm9sf3 : D3ZUD8            | 4.98  | yes | up   | 1.2E-05 | yes | chr1  | promoter | Intermediate    | LCP | 1.35 | no  | up   | 0.29 | no  | 1.06 | no  | up   | 1.3E-07 | yes |
| MSTRG.20352.9 : Ubp1 : D4A030             | 0.44  | yes | down | 2.3E-04 | yes | chr8  | intron   | internal intron | NA  | 1.12 | no  | up   | 0.57 | no  | 0.98 | no  | down | 1.9E-01 | no  |
| MSTRG.17010.1 : Ttc27 : D3ZTG2            | 0.43  | yes | down | 8.1E-09 | yes | chr6  | exon     | internal exon   | NA  | 1.22 | no  | up   | 0.47 | no  | 1.02 | no  | up   | 1.3E-01 | no  |
| MSTRG.9568.6 : Nedd4l : F1LRN8            | 2.03  | yes | up   | 3.6E-05 | yes | chr18 | intron   | internal intron | NA  | 1.01 | no  | up   | 0.48 | no  | 0.95 | no  | down | 3.9E-02 | yes |
| MSTRG.16557.4 : Srrml : B2RYB3            | 2.05  | yes | up   | 2.0E-04 | yes | chr5  | intron   | internal intron | NA  | 0.49 | yes | down | 0.13 | no  | 1.10 | no  | up   | 2.8E-06 | yes |
| MSTRG.14242.2 : Cdk14 : D3ZSZ0            | 0.30  | yes | down | 1.6E-17 | yes | chr4  | intron   | internal intron | NA  | 1.45 | no  | up   | 0.20 | no  | 1.02 | no  | up   | 4.9E-01 | no  |
| ENSRNOT00000088245 : P2rx1 : B7U2F3       | 5.09  | yes | up   | 1.5E-10 | yes | chr10 | promoter | Intermediate    | LCP | 3.72 | yes | up   | 0.03 | yes | 0.82 | yes | down | 1.7E-12 | yes |
| MSTRG.19819.3 : Neo1 : P97603             | 0     | yes | down | 3.5E-04 | yes | chr8  | promoter | Intermediate    | LCP | 1.00 | no  | down | 0.99 | no  | 0.98 | no  | down | 1.8E-02 | yes |
| MSTRG.15096.6 : Cacna1c : F1MA84          | 4.75  | yes | up   | 4.3E-04 | yes | chr4  | intron   | internal intron | NA  | 0.35 | yes | down | 0.06 | no  | 0.97 | no  | down | 2.7E-02 | yes |
| MSTRG.12184.3 : Pcnt : D3ZMY8             | 0.14  | yes | down | 8.5E-07 | yes | chr20 | promoter | Distal          | ICP | 1.08 | no  | up   | 0.89 | no  | 0.84 | no  | down | 9.2E-06 | yes |
| MSTRG.1362.1 : Rsf1 : D3ZGQ8              | 2.47  | yes | up   | 3.7E-29 | yes | chr1  | exon     | last exon       | NA  | 1.04 | no  | up   | 0.49 | no  | 0.95 | no  | down | 6.9E-05 | yes |
| MSTRG.3645.1 : Sifn13 : A0A096MKD0        | 2.27  | yes | up   | 1.5E-04 | yes | chr10 | promoter | Intermediate    | LCP | 0.64 | no  | down | 0.41 | no  | 0.97 | no  | down | 2.7E-02 | yes |
| MSTRG.6137.1 : Gorab : B1H222             | 0.41  | yes | down | 1.4E-04 | yes | chr13 | intron   | first intron    | NA  | 0.79 | no  | down | 0.45 | no  | 1.08 | no  | up   | 1.7E-02 | yes |
| MSTRG.4375.2 : Tbcd : F1M1D5              | 10.07 | yes | up   | 4.7E-25 | yes | chr10 | intron   | internal intron | NA  | 0.99 | no  | down | 0.97 | no  | 0.94 | no  | down | 2.3E-10 | yes |
| ENSRNOT00000041140 : Acaca : P11497       | 0.15  | yes | down | 3.0E-04 | yes | chr10 | intron   | internal intron | NA  | 1.24 | no  | up   | 0.27 | no  | 0.97 | no  | down | 3.1E-04 | yes |
| ENSRNOT00000075193 : Dock4 : M0R6K4       | 0.43  | yes | down | 2.9E-04 | yes | chr6  | exon     | last exon       | NA  | 1.00 | no  | down | 0.90 | no  | 0.94 | no  | down | 8.4E-03 | yes |
| MSTRG.8192.2 : Tnm3 : F1LV44              | 3.57  | yes | up   | 5.2E-08 | yes | chr16 | exon     | internal exon   | NA  | 1.35 | no  | up   | 0.47 | no  | 1.03 | no  | up   | 3.0E-03 | yes |
| MSTRG.13195.13 : Arhgap1 : D4A6C5         | 3.73  | yes | up   | 1.8E-11 | yes | chr3  | intron   | internal intron | NA  | 0.71 | no  | down | 0.45 | no  | 1.04 | no  | up   | 1.7E-04 | yes |
| MSTRG.16557.1 : Srrml : B2RYB3            | 2.05  | yes | up   | 2.0E-04 | yes | chr5  | intron   | internal intron | NA  | 0.88 | no  | down | 0.64 | no  | 1.10 | no  | up   | 2.8E-06 | yes |
| ENSRNOT00000079680 : Tbl1x : B2RZA6       | 0     | yes | down | 6.0E-05 | yes | chrX  | intron   | internal intron | NA  | 0.91 | no  | down | 0.73 | no  | 1.12 | no  | up   | 7.8E-09 | yes |
| MSTRG.20817.5 : Map4k4 : A0A0G2K7W4       | 0.36  | yes | down | 7.1E-05 | yes | chr9  | intron   | internal intron | NA  | 0.97 | no  | down | 0.93 | no  | 1.10 | no  | up   | 7.1E-06 | yes |
| MSTRG.19219.6 : Fkbp11 : G3V7V5           | inf   | yes | up   | 4.7E-06 | yes | chr7  | intron   | internal intron | NA  | 0.53 | no  | down | 0.38 | no  | 1.06 | no  | up   | 1.6E-07 | yes |
| MSTRG.4716.6 : Adcy5 : G3V9G1             | 0.16  | yes | down | 2.3E-10 | yes | chr11 | intron   | internal intron | NA  | 2.40 | yes | up   | 0.09 | no  | 1.00 | no  | down | 7.6E-01 | no  |
| ENSRNOT00000019409 : Nr3c1 : P06536       | 0.27  | yes | down | 1.2E-04 | yes | chr18 | exon     | first exon      | NA  | 1.00 | no  | down | 0.40 | no  | 0.91 | no  | down | 1.6E-10 | yes |
| ENSRNOT00000088827 : Akap8 : Q63014       | 0.08  | yes | down | 2.7E-04 | yes | chr7  | intron   | internal intron | NA  | 0.95 | no  | down | 0.80 | no  | 0.99 | no  | down | 2.8E-01 | no  |
| MSTRG.3136.1 : Anxa6 : Q6IMZ3             | 2.83  | yes | up   | 1.2E-05 | yes | chr10 | intron   | internal intron | NA  | 0.93 | no  | down | 0.25 | no  | 0.84 | no  | down | 6.6E-16 | yes |
| ENSRNOT00000030037 : Arap1 : F1LM60       | 2.71  | yes | up   | 3.3E-04 | yes | chr1  | intron   | first intron    | NA  | 1.08 | no  | up   | 0.73 | no  | 0.99 | no  | down | 2.5E-02 | yes |
| ENSRNOT00000016060 : Ndufb3 : D4A4P3      | 0.10  | yes | down | 1.1E-16 | yes | chr9  | intron   | first intron    | NA  | 1.55 | no  | up   | 0.14 | no  | 1.01 | no  | up   | 2.1E-01 | no  |
| MSTRG.9868.2 : Cc2d1a : Q66HA5            | 0.21  | yes | down | 1.7E-05 | yes | chr19 | promoter | Distal          | LCP | 0.84 | no  | down | 0.57 | no  | 0.96 | no  | down | 4.1E-02 | yes |
| MSTRG.2161.1 : Map4k2 : D3ZXB1            | 4.89  | yes | up   | 3.4E-06 | yes | chr1  | intron   | internal intron | NA  | 0.74 | no  | down | 0.25 | no  | 0.65 | yes | down | 2.4E-14 | yes |
| ENSRNOT00000040069 : Eln : A0A0G2JST5     | 3.55  | yes | up   | 3.0E-04 | yes | chr12 | intron   | internal intron | NA  | 0.67 | no  | down | 0.24 | no  | 0.91 | no  | down | 1.2E-01 | no  |
| ENSRNOT00000080522 : Stat1 : F1M9D6       | 0.50  | yes | down | 1.5E-10 | yes | chr9  | intron   | first intron    | NA  | 0.97 | no  | down | 0.73 | no  | 1.10 | no  | up   | 1.4E-13 | yes |
| ENSRNOT00000017417 : Epb41l2 : D3ZM69     | 0.25  | yes | down | 1.1E-12 | yes | chr1  | intron   | internal intron | NA  | 0.94 | no  | down | 0.33 | no  | 0.91 | no  | down | 8.9E-11 | yes |
| MSTRG.21008.2 : Myl1 : P02600             |       |     |      |         |     |       |          |                 |     |      |     |      |      |     |      |     |      |         |     |

|                                           |      |     |      |         |     |       |          |                 |     |      |     |      |      |     |      |     |      |         |     |
|-------------------------------------------|------|-----|------|---------|-----|-------|----------|-----------------|-----|------|-----|------|------|-----|------|-----|------|---------|-----|
| MSTRG.21202.3 : Lrrfip1 : Q66HF9          | 6.49 | yes | up   | 4.9E-10 | yes | chr9  | exon     | last exon       | NA  | 0.98 | no  | down | 0.97 | no  | 1.15 | no  | up   | 2.1E-11 | yes |
| ENSRNOT00000000106 : Gpr89b : F1LTD0      | 0.21 | yes | down | 2.8E-04 | yes | chr2  | intron   | internal intron | NA  | 0.98 | no  | down | 0.88 | no  | 0.93 | no  | down | 2.3E-02 | yes |
| ENSRNOT000000041910 : Fmn1 : D4A7C2       | 4.93 | yes | up   | 1.3E-26 | yes | chr3  | intron   | internal intron | NA  | 1.02 | no  | up   | 0.80 | no  | 1.33 | yes | up   | 4.7E-13 | yes |
| MSTRG.18268.16 : Akap8 : Q63014           | 0.08 | yes | down | 2.7E-04 | yes | chr7  | intron   | internal intron | NA  | 0.93 | no  | down | 0.66 | no  | 0.99 | no  | down | 2.8E-01 | no  |
| MSTRG.21170.1 : Gigyf2 : A0A096MKC0       | 0.59 | yes | down | 1.9E-05 | yes | chr9  | intron   | internal intron | NA  | 0.88 | no  | down | 0.38 | no  | 1.01 | no  | up   | 7.0E-01 | no  |
| ENSRNOT000000093424 : Eftud2 : F1LM66     | 4.66 | yes | up   | 6.0E-04 | yes | chr10 | exon     | internal exon   | NA  | 0.94 | no  | down | 0.54 | no  | 1.02 | no  | up   | 4.9E-02 | yes |
| MSTRG.12973.8 : Rbms1 : A0A0G2K4R7        | 0    | yes | down | 3.3E-05 | yes | chr3  | intron   | internal intron | NA  | 0.82 | no  | down | 0.43 | no  | 0.97 | no  | down | 1.2E-01 | no  |
| MSTRG.350.1 : Thbs2 : D4A2G6              | 1.43 | yes | up   | 1.4E-19 | yes | chr1  | intron   | internal intron | NA  | 0.93 | no  | down | 0.68 | no  | 1.17 | no  | up   | 2.2E-05 | yes |
| MSTRG.8278.31 : Rbpms : F2Z3S5            | 0.02 | yes | down | 2.6E-05 | yes | chr16 | promoter | Proximal        | ICP | 0.79 | no  | down | 0.05 | yes | 1.06 | no  | up   | 4.9E-05 | yes |
| MSTRG.18268.24 : Akap8 : Q63014           | 0.08 | yes | down | 2.7E-04 | yes | chr7  | intron   | internal intron | NA  | 0.93 | no  | down | 0.89 | no  | 0.99 | no  | down | 2.8E-01 | no  |
| MSTRG.12896.8 : Rabgap1 : D3ZX42          | 3.82 | yes | up   | 8.1E-06 | yes | chr3  | intron   | internal intron | NA  | 1.73 | no  | up   | 0.09 | no  | 1.01 | no  | up   | 1.9E-01 | no  |
| ENSRNOT00000019004 : Alpl : P08289        | 0.52 | yes | down | 2.4E-04 | yes | chr5  | promoter | Intermediate    | LCP | 0.98 | no  | down | 0.98 | no  | 1.00 | no  | down | 6.2E-01 | no  |
| MSTRG.14948.1 : Magil1 : M0R8T1           | 0.38 | yes | down | 2.0E-04 | yes | chr4  | intron   | internal intron | NA  | 0.98 | no  | down | 0.76 | no  | 0.99 | no  | down | 6.0E-01 | no  |
| ENSRNOT000000048218 : Pcnt : D3ZMY8       | 0.14 | yes | down | 8.5E-07 | yes | chr20 | promoter | Distal          | ICP | 1.00 | no  | down | 0.49 | no  | 0.84 | no  | down | 9.2E-06 | yes |
| ENSRNOT000000067150 : Gmpr2 : A0A0G2JX25  | 0.33 | yes | down | 2.2E-06 | yes | chr15 | promoter | Distal          | LCP | 0.97 | no  | down | 0.44 | no  | 0.95 | no  | down | 1.0E-01 | no  |
| MSTRG.8517.2 : Naa35 : Q6DKG0             | inf  | yes | up   | 1.7E-04 | yes | chr17 | promoter | Proximal        | LCP | 1.61 | no  | up   | 0.20 | no  | 1.04 | no  | up   | 3.3E-02 | yes |
| MSTRG.3511.3 : Cpd : A0A0G2JY30           | 0.15 | yes | down | 4.3E-04 | yes | chr10 | intron   | internal intron | NA  | 1.63 | no  | up   | 0.48 | no  | 1.13 | no  | up   | 1.1E-08 | yes |
| MSTRG.8325.3 : Hook3 : Q7TQ77             | 0.22 | yes | down | 2.1E-04 | yes | chr16 | intron   | internal intron | NA  | 1.00 | no  | down | 0.94 | no  | 1.01 | no  | up   | 5.0E-03 | yes |
| MSTRG.14995.1 : Itp1 : A0A0A0MY31         | 3.16 | yes | up   | 1.1E-05 | yes | chr4  | intron   | internal intron | NA  | 0.57 | no  | down | 0.58 | no  | 0.87 | no  | down | 1.1E-14 | yes |
| MSTRG.4991.2 : Ppm1f : Q9WVR7             | 1.80 | yes | up   | 3.8E-11 | yes | chr11 | intron   | internal intron | NA  | 1.14 | no  | up   | 0.55 | no  | 0.91 | no  | down | 2.5E-06 | yes |
| MSTRG.11953.26 : RT1-CE7 : D3ZLE6         | inf  | yes | up   | 7.3E-07 | yes | chr20 | exon     | internal exon   | NA  | 0.82 | no  | down | 0.40 | no  | 1.22 | yes | up   | 7.3E-16 | yes |
| MSTRG.11405.8 : Pde4dip : A0A0G2JW66      | 6.94 | yes | up   | 5.0E-08 | yes | chr2  | exon     | internal exon   | NA  | 0.63 | no  | down | 0.31 | no  | 1.06 | no  | up   | 5.1E-04 | yes |
| MSTRG.7199.1 : Kcnma1 : A0A0G2K104        | 4.06 | yes | up   | 2.6E-13 | yes | chr15 | intron   | internal intron | NA  | 1.07 | no  | up   | 0.57 | no  | 0.89 | no  | down | 7.4E-06 | yes |
| MSTRG.11265.4 : Ubap2l : E9PTR4           | 6.62 | yes | up   | 4.0E-04 | yes | chr2  | intron   | internal intron | NA  | 1.01 | no  | up   | 0.98 | no  | 1.13 | no  | up   | 3.8E-12 | yes |
| MSTRG.6480.7 : Evi5 : D3ZJN9              | 4.04 | yes | up   | 4.0E-04 | yes | chr14 | intron   | internal intron | NA  | 1.58 | no  | up   | 0.09 | no  | 0.98 | no  | down | 2.5E-01 | no  |
| ENSRNOT0000000064007 : Rbm28 : D4A5K7     | 7.60 | yes | up   | 4.6E-06 | yes | chr4  | intron   | internal intron | NA  | 1.13 | no  | up   | 0.21 | no  | 1.18 | no  | up   | 6.9E-05 | yes |
| MSTRG.14711.2 : Mat2a : F1LRB8            | 0.10 | yes | down | 1.4E-04 | yes | chr4  | exon     | last exon       | NA  | 1.30 | no  | up   | 0.11 | no  | 0.99 | no  | down | 1.5E-01 | no  |
| MSTRG.17733.3 : Atg2b : Q5EBA2            | 0.42 | yes | down | 4.5E-04 | yes | chr6  | exon     | internal exon   | NA  | 1.57 | no  | up   | 0.44 | no  | 1.03 | no  | up   | 1.2E-01 | no  |
| MSTRG.10799.2 : Gyg1 : F8WFR6             | 0.52 | yes | down | 3.8E-05 | yes | chr2  | intron   | internal intron | NA  | 2.47 | yes | up   | 0.13 | no  | 1.17 | no  | up   | 1.9E-09 | yes |
| ENSRNOT000000027774 : Pafah1b3 : O35263   | 4.32 | yes | up   | 3.8E-07 | yes | chr1  | promoter | Distal          | LCP | 1.06 | no  | up   | 0.57 | no  | 0.99 | no  | down | 2.6E-01 | no  |
| MSTRG.19764.4 : Pstpip1 : B0BNK4          | 0.47 | yes | down | 3.6E-05 | yes | chr8  | intron   | internal intron | NA  | 0.85 | no  | down | 0.36 | no  | 1.20 | yes | up   | 1.1E-06 | yes |
| MSTRG.6213.1 : Fcgr2b : A3RLA8            | 0.44 | yes | down | 2.8E-04 | yes | chr13 | promoter | Distal          | LCP | 1.03 | no  | up   | 0.69 | no  | 1.04 | no  | up   | 4.3E-03 | yes |
| ENSRNOT000000001242 : Stx2 : Q7TS57       | 4.45 | yes | up   | 6.0E-04 | yes | chr12 | exon     | last exon       | NA  | 1.39 | no  | up   | 0.41 | no  | 0.91 | no  | down | 2.6E-04 | yes |
| MSTRG.11223.4 : Fdps : F1LND7             | inf  | yes | up   | 2.2E-05 | yes | chr2  | exon     | last exon       | NA  | 0.83 | no  | down | 0.39 | no  | 1.07 | no  | up   | 1.2E-03 | yes |
| ENSRNOT000000080013 : Eml4 : A0A0G2K2Z0   | 0.79 | yes | down | 2.3E-04 | yes | chr6  | exon     | internal exon   | NA  | 0.96 | no  | down | 0.82 | no  | 1.03 | no  | up   | 6.8E-04 | yes |
| ENSRNOT000000078670 : Smndc1 : Q4QQU6     | inf  | yes | up   | 1.3E-04 | yes | chr1  | promoter | Distal          | LCP | 1.39 | no  | up   | 0.39 | no  | 1.06 | no  | up   | 2.2E-04 | yes |
| ENSRNOT000000001415 : Elavl1 : B5DF91     | 0.21 | yes | down | 5.3E-09 | yes | chr12 | intron   | internal intron | NA  | 1.02 | no  | up   | 0.84 | no  | 1.05 | no  | up   | 2.2E-07 | yes |
| ENSRNOT000000077530 : Eogt : Q5NDL0       | 6.71 | yes | up   | 1.7E-04 | yes | chr4  | intron   | internal intron | NA  | 0.81 | no  | down | 0.76 | no  | 1.10 | no  | up   | 2.0E-05 | yes |
| MSTRG.659.7 : Cic : D4A853                | 4.32 | yes | up   | 3.8E-07 | yes | chr1  | exon     | internal exon   | NA  | 0.96 | no  | down | 0.86 | no  | 1.06 | no  | up   | 4.3E-02 | yes |
| MSTRG.4335.5 : Pcyt2 : O88637             | 4.82 | yes | up   | 3.0E-05 | yes | chr10 | intron   | last intron     | NA  | 0.67 | no  | down | 0.04 | yes | 0.94 | no  | down | 1.8E-03 | yes |
| MSTRG.7470.4 : Acin1 : E9PST5             | 0.30 | yes | down | 1.1E-04 | yes | chr15 | promoter | Distal          | LCP | 1.44 | no  | up   | 0.38 | no  | 0.98 | no  | down | 5.1E-04 | yes |
| MSTRG.12910.2 : Golga1 : D4A6K4           | 0.04 | yes | down | 1.1E-04 | yes | chr3  | intron   | internal intron | NA  | 1.27 | no  | up   | 0.20 | no  | 1.12 | no  | up   | 8.2E-05 | yes |
| MSTRG.4727.2 : Kalrn : P97924             | 1.54 | yes | up   | 9.1E-07 | yes | chr11 | exon     | last exon       | NA  | 0.95 | no  | down | 0.95 | no  | 1.04 | no  | up   | 1.6E-04 | yes |
| MSTRG.2366.3 : Pgm5 : D3ZVR9              | 2.44 | yes | up   | 4.5E-04 | yes | chr1  | intron   | last intron     | NA  | 0.76 | no  | down | 0.60 | no  | 1.01 | no  | up   | 3.2E-01 | no  |
| ENSRNOT0000000084670 : Abr : A0A0G2JZZ7   | inf  | yes | up   | 3.7E-04 | yes | chr10 | intron   | internal intron | NA  | 1.05 | no  | up   | 0.34 | no  | 1.05 | no  | up   | 1.0E-03 | yes |
| ENSRNOT000000078249 : Oxsm : G3V6R7       | 7.88 | yes | up   | 2.7E-09 | yes | chr15 | exon     | last exon       | NA  | 1.35 | no  | up   | 0.19 | no  | 1.01 | no  | up   | 5.6E-01 | no  |
| ENSRNOT000000007484 : Der1l : F7FNS3      | 0.48 | yes | down | 3.9E-05 | yes | chr7  | exon     | last exon       | NA  | 0.88 | no  | down | 0.80 | no  | 1.04 | no  | up   | 2.4E-03 | yes |
| MSTRG.16461.5 : Pum1 : D3Z8L5             | 0.44 | yes | down | 3.1E-04 | yes | chr5  | intron   | internal intron | NA  | 1.74 | no  | up   | 0.01 | yes | 1.03 | no  | up   | 7.0E-02 | no  |
| MSTRG.6624.7 : Ankrd17 : D4A0B4           | 3.39 | yes | up   | 8.9E-05 | yes | chr14 | intron   | internal intron | NA  | 0.96 | no  | down | 0.40 | no  | 1.11 | no  | up   | 1.6E-06 | yes |
| MSTRG.549.1 : Zc3h4 : D3ZVW3              | 2.19 | yes | up   | 2.6E-04 | yes | chr1  | intron   | internal intron | NA  | 1.42 | no  | up   | 0.25 | no  | 0.98 | no  | down | 3.2E-01 | no  |
| MSTRG.3600.2 : Nfl : F1LM28               | 2.12 | yes | up   | 4.3E-05 | yes | chr10 | intron   | internal intron | NA  | 0.16 | yes | down | 0.23 | no  | 0.98 | no  | down | 1.9E-01 | no  |
| MSTRG.6327.1 : Acbd3 : G3V6E4             | 2.42 | yes | up   | 1.4E-04 | yes | chr13 | intron   | internal intron | NA  | 1.29 | no  | up   | 0.32 | no  | 1.07 | no  | up   | 2.4E-14 | yes |
| MSTRG.5906.2 : Atp2b4 : Q64542            | 2.31 | yes | up   | 1.3E-05 | yes | chr13 | intron   | internal intron | NA  | 1.38 | no  | up   | 0.42 | no  | 0.68 | yes | down | 2.6E-19 | yes |
| MSTRG.20352.5 : Ubp1 : D4A030             | 0.44 | yes | down | 2.3E-04 | yes | chr8  | intron   | internal intron | NA  | 0.89 | no  | down | 0.47 | no  | 0.98 | no  | down | 1.9E-01 | no  |
| ENSRNOT000000067228 : Ddost : Q641Y0      | 2.98 | yes | up   | 4.3E-04 | yes | chr5  | promoter | Distal          | ICP | 1.12 | no  | up   | 0.45 | no  | 1.04 | no  | up   | 7.4E-04 | yes |
| ENSRNOT000000080421 : Morf4l1 : Q6AYU1    | 0.22 | yes | down | 4.4E-05 | yes | chr8  | intron   | internal intron | NA  | 1.04 | no  | up   | 0.45 | no  | 1.07 | no  | up   | 1.5E-07 | yes |
| ENSRNOT0000000061630 : Evi5 : D3ZJN9      | 4.04 | yes | up   | 4.0E-04 | yes | chr14 | intron   | internal intron | NA  | 0.48 | yes | down | 0.31 | no  | 0.98 | no  | down | 2.5E-01 | no  |
| ENSRNOT0000000035129 : Dennd1b : F1M3B0   | 0.50 | yes | down | 5.1E-04 | yes | chr13 | promoter | Distal          | HCP | 0.97 | no  | down | 0.45 | no  | 0.99 | no  | down | 8.0E-01 | no  |
| MSTRG.1035.3 : Rasip1 : B5DF05            | 6.95 | yes | up   | 1.3E-05 | yes | chr1  | intron   | first intron    | NA  | 0.76 | no  | down | 0.63 | no  | 0.96 | no  | down | 1.3E-02 | yes |
| MSTRG.18752.1 : Tatdn1 : MOR6T1           | 0.49 | yes | down | 2.8E-04 | yes | chr7  | promoter | Distal          | LCP | 0.91 | no  | down | 0.57 | no  | 0.91 | no  | down | 4.5E-09 | yes |
| MSTRG.2527.3 : Pi4k2a : Q99M64            | 0.48 | yes | down | 2.9E-06 | yes | chr1  | intron   | internal intron | NA  | 0.81 | no  | down | 0.30 | no  | 1.02 | no  | up   | 1.6E-01 | no  |
| ENSRNOT000000039410 : Scai : F1M3P6       | 0.24 | yes | down | 1.2E-04 | yes | chr3  | intron   | internal intron | NA  | 0.95 | no  | down | 0.61 | no  | 0.86 | no  | down | 1.0E-11 | yes |
| MSTRG.16756.1 : Kif1b : A0A0G2KA12        | 3.65 | yes | up   | 7.4E-05 | yes | chr5  | intron   | internal intron | NA  | 0.79 | no  | down | 0.26 | no  | 1.05 | no  | up   | 6.5E-02 | no  |
| MSTRG.6248.2 : Ncstn : Q8CGU6             | 0.30 | yes | down | 6.8E-05 | yes | chr13 | intron   | first intron    | NA  | 0.83 | no  | down | 0.64 | no  | 1.02 | no  | up   | 4.0E-02 | yes |
| MSTRG.4725.16 : Kalrn : P97924            | 1.54 | yes | up   | 9.1E-07 | yes | chr11 | exon     | last exon       | NA  | 1.10 | no  | up   | 0.52 | no  | 1.04 | no  | up   | 1.6E-04 | yes |
| ENSRNOT000000005148 : Gorab : B1H222      | 0.41 | yes | down | 1.4E-04 | yes | chr13 | intron   | first intron    | NA  | 1.60 | no  | up   | 0.26 | no  | 1.08 | no  | up   | 1.7E-02 | yes |
| ENSRNOT000000090267 : Aamp : B0K024       | 0.09 | yes | down | 2.6E-04 | yes | chr9  | promoter | Intermediate    | LCP | 0.94 | no  | down | 0.01 | yes | 1.06 | no  | up   | 1.5E-05 | yes |
| ENSRNOT000000020608 : Rufy3 : A0A0G2K6A9  | 2.37 | yes | up   | 3.9E-04 | yes | chr14 | promoter | Distal          | LCP | 1.02 | no  | up   | 0.47 | no  | 1.11 | no  | up   | 1.3E-05 | yes |
| ENSRNOT000000012005 : Mpp5 : B4F7E7       | 0.37 | yes | down | 1.0E-04 | yes | chr6  | exon     | internal exon   | NA  | 1.14 | no  | up   | 0.12 | no  | 0.99 | no  | down | 5.9E-01 | no  |
| ENSRNOT0000000085987 : Fyn : Q62844       | 0.38 | yes | down | 2.4E-05 | yes | chr20 | exon     | last exon       | NA  | 1.05 | no  | up   | 0.76 | no  | 1.01 | no  | up   | 5.2E-01 | no  |
| ENSRNOT000000084268 : Picalm : A0A1B0GWW9 | 8.74 | yes | up   | 2.1E-13 | yes | chr1  | intron   | internal intron | NA  | 0.50 | yes | down | 0.04 | yes | 1.04 | no  | up   | 1.0E-01 | no  |
| MSTRG.1554                                |      |     |      |         |     |       |          |                 |     |      |     |      |      |     |      |     |      |         |     |

|                                          |       |     |      |         |     |       |          |                 |     |      |     |      |      |     |      |     |      |         |     |
|------------------------------------------|-------|-----|------|---------|-----|-------|----------|-----------------|-----|------|-----|------|------|-----|------|-----|------|---------|-----|
| MSTRG.1974.1 : Nap1l4 : Q5U2Z3           | 0.36  | yes | down | 7.2E-05 | yes | chr1  | intron   | internal intron | NA  | 0.57 | no  | down | 0.00 | yes | 0.98 | no  | down | 3.1E-02 | yes |
| MSTRG.22089.3 : Htatsf1 : D4A997         | 6.87  | yes | up   | 2.7E-04 | yes | chrX  | promoter | Intermediate    | HCP | 0.85 | no  | down | 0.47 | no  | 0.95 | no  | down | 9.0E-07 | yes |
| ENSRNOT00000075922 : Fyn : Q62844        | 0.38  | yes | down | 2.4E-05 | yes | chr20 | exon     | last exon       | NA  | 0.97 | no  | down | 0.76 | no  | 1.01 | no  | up   | 5.2E-01 | no  |
| ENSRNOT00000027050 : Ube2f : Q5U203      | 7.18  | yes | up   | 7.2E-05 | yes | chr9  | intron   | internal intron | NA  | 0.90 | no  | down | 0.41 | no  | 1.01 | no  | up   | 5.6E-01 | no  |
| MSTRG.10104.1 : Sf3b3 : E9PT66           | 0.34  | yes | down | 3.6E-04 | yes | chr19 | exon     | last exon       | NA  | 1.08 | no  | up   | 0.89 | no  | 0.97 | no  | down | 3.1E-07 | yes |
| ENSRNOT00000027868 : Becn1 : Q91XJ1      | 0.15  | yes | down | 1.2E-04 | yes | chr10 | exon     | first exon      | NA  | 0.88 | no  | down | 0.55 | no  | 0.97 | no  | down | 9.2E-02 | no  |
| MSTRG.19042.4 : Aco2 : Q9ER34            | 0     | yes | down | 2.0E-04 | yes | chr7  | promoter | Distal          | ICP | 0.71 | no  | down | 0.43 | no  | 0.90 | no  | down | 5.3E-13 | yes |
| MSTRG.4972.2 : Kihl22 : D3ZZC3           | 2.85  | yes | up   | 3.5E-06 | yes | chr11 | intron   | internal intron | NA  | 0.34 | yes | down | 0.04 | yes | 0.98 | no  | down | 1.1E-01 | no  |
| MSTRG.13265.5 : Tcp1l1l : F1M9Y7         | 3.13  | yes | up   | 1.2E-06 | yes | chr3  | intron   | last intron     | NA  | 1.03 | no  | up   | 0.65 | no  | 0.99 | no  | down | 8.5E-01 | no  |
| ENSRNOT00000089082 : Palmd : Q4KM62      | 0.16  | yes | down | 7.2E-05 | yes | chr2  | promoter | Distal          | LCP | 0.97 | no  | down | 0.25 | no  | 0.77 | yes | down | 4.3E-06 | yes |
| ENSRNOT00000071590 : Apoo : M0R7G4       | 22.85 | yes | up   | 2.9E-05 | yes | chrX  | intron   | first intron    | NA  | 1.38 | no  | up   | 0.25 | no  | 0.95 | no  | down | 2.3E-02 | yes |
| MSTRG.3895.4 : Cdk12 : A0A0G2K5U7        | 5.94  | yes | up   | 1.1E-04 | yes | chr10 | exon     | first exon      | NA  | 1.28 | no  | up   | 0.14 | no  | 0.97 | no  | down | 5.5E-04 | yes |
| ENSRNOT000000064070 : Ank1 : D3Z9Z0      | 1.38  | yes | up   | 4.3E-04 | yes | chr16 | intron   | internal intron | NA  | 1.00 | no  | down | 0.90 | no  | 0.90 | no  | down | 2.2E-09 | yes |
| ENSRNOT00000085727 : Myo1e : Q63356      | 3.15  | yes | up   | 9.4E-05 | yes | chr8  | intron   | first intron    | NA  | 1.00 | no  | down | 0.48 | no  | 1.03 | no  | up   | 1.7E-02 | yes |
| ENSRNOT00000001360 : Tsc22d1 : P62501    | 3.00  | yes | up   | 3.0E-04 | yes | chr15 | promoter | Intermediate    | ICP | 5.81 | yes | up   | 0.24 | no  | 0.77 | yes | down | 5.9E-09 | yes |
| MSTRG.19528.2 : Opeml : F1M2I5           | 2.41  | yes | up   | 1.6E-04 | yes | chr8  | intron   | last intron     | NA  | 1.64 | no  | up   | 0.38 | no  | 0.91 | no  | down | 2.1E-15 | yes |
| MSTRG.2839.8 : Srrm2 : A0A0G2K2M9        | 1.72  | yes | up   | 9.0E-05 | yes | chr10 | exon     | internal exon   | NA  | 1.28 | no  | up   | 0.73 | no  | 1.00 | no  | up   | 9.0E-01 | no  |
| MSTRG.8278.44 : Rbpms : F2Z3S5           | 0.02  | yes | down | 2.6E-05 | yes | chr16 | promoter | Proximal        | ICP | 0.88 | no  | down | 0.33 | no  | 1.06 | no  | up   | 4.9E-05 | yes |
| MSTRG.5958.1 : Crp1 : P47875             | 1.98  | yes | up   | 3.9E-04 | yes | chr13 | promoter | Intermediate    | LCP | 0.13 | yes | down | 0.26 | no  | 1.11 | no  | up   | 3.1E-08 | yes |
| ENSRNOT00000077372 : Gsta3 : P04904      | 2.74  | yes | up   | 2.3E-04 | yes | chr9  | exon     | last exon       | NA  | 1.01 | no  | up   | 0.84 | no  | 0.64 | yes | down | 2.9E-15 | yes |
| ENSRNOT00000051496 : Map3k5 : D3ZW27     | 0.78  | yes | down | 2.6E-04 | yes | chr1  | exon     | internal exon   | NA  | 1.43 | no  | up   | 0.05 | yes | 1.15 | no  | up   | 1.2E-09 | yes |
| MSTRG.10104.4 : Sf3b3 : E9PT66           | 0.34  | yes | down | 3.6E-04 | yes | chr19 | exon     | last exon       | NA  | 0.81 | no  | down | 0.45 | no  | 0.97 | no  | down | 3.1E-07 | yes |
| MSTRG.16048.3 : Fggy : Q5FVC3            | 18.59 | yes | up   | 3.3E-04 | yes | chr5  | intron   | internal intron | NA  | 1.26 | no  | up   | 0.13 | no  | 0.84 | no  | down | 2.3E-07 | yes |
| MSTRG.4276.1 : Timp2 : P30121            | 3.20  | yes | up   | 1.5E-04 | yes | chr10 | exon     | first exon      | NA  | 3.47 | yes | up   | 0.08 | no  | 1.01 | no  | up   | 5.4E-01 | no  |
| MSTRG.16748.2 : Tardbp : I6L9G6          | 2.86  | yes | up   | 4.5E-10 | yes | chr5  | intron   | internal intron | NA  | 1.01 | no  | up   | 0.96 | no  | 1.05 | no  | up   | 5.8E-11 | yes |
| ENSRNOT00000014660 : Terf2ip : Q5EAN7    | 6.13  | yes | up   | 7.3E-09 | yes | chr19 | intron   | first intron    | NA  | 1.25 | no  | up   | 0.78 | no  | 1.01 | no  | up   | 4.8E-01 | no  |
| ENSRNOT00000016987 : Fam89b : Q566R4     | inf   | yes | up   | 8.3E-05 | yes | chr1  | promoter | Distal          | LCP | 0.79 | no  | down | 0.72 | no  | 0.95 | no  | down | 1.3E-01 | no  |
| ENSRNOT00000076044 : Prdm16 : M0RDL0     | 0.37  | yes | down | 2.7E-04 | yes | chr5  | exon     | internal exon   | NA  | 1.16 | no  | up   | 0.63 | no  | 0.83 | yes | down | 1.1E-06 | yes |
| ENSRNOT00000044452 : Dst : D3ZC56        | 0.35  | yes | down | 1.3E-05 | yes | chr9  | intron   | internal intron | NA  | 1.57 | no  | up   | 0.17 | no  | 1.03 | no  | up   | 7.3E-04 | yes |
| ENSRNOT00000013901 : Xpo4 : D3ZQI6       | 5.75  | yes | up   | 1.3E-06 | yes | chr15 | intron   | internal intron | NA  | 1.09 | no  | up   | 0.24 | no  | 0.88 | no  | down | 7.2E-03 | yes |
| MSTRG.15855.3 : RGD1306148 : F1M446      | 0.22  | yes | down | 4.0E-05 | yes | chr5  | intron   | internal intron | NA  | 1.00 | no  | down | 0.77 | no  | 1.01 | no  | up   | 7.4E-02 | no  |
| MSTRG.15110.1 : Wnk1 : Q9JH7             | 18.77 | yes | up   | 1.6E-38 | yes | chr4  | exon     | internal exon   | NA  | 0.86 | no  | down | 0.50 | no  | 1.04 | no  | up   | 1.7E-03 | yes |
| MSTRG.11265.32 : Ubap2l : E9PTR4         | 6.62  | yes | up   | 4.0E-04 | yes | chr2  | intron   | internal intron | NA  | 0.56 | no  | down | 0.18 | no  | 1.13 | no  | up   | 3.8E-12 | yes |
| MSTRG.5341.1 : Serpine1 : FILM16         | 2.28  | yes | up   | 2.6E-04 | yes | chr12 | exon     | last exon       | NA  | 1.21 | no  | up   | 0.47 | no  | 1.00 | no  | down | 7.7E-01 | no  |
| MSTRG.21938.4 : Kihl13 : F1LM44          | 0.22  | yes | down | 7.1E-07 | yes | chrX  | intron   | last intron     | NA  | 0.63 | no  | down | 0.28 | no  | 1.03 | no  | up   | 6.8E-03 | yes |
| MSTRG.5439.2 : Gusb : F1LQQ8             | 29.04 | yes | up   | 6.5E-05 | yes | chr12 | intron   | internal intron | NA  | 1.01 | no  | up   | 0.97 | no  | 0.97 | no  | down | 1.8E-03 | yes |
| ENSRNOT00000080352 : Plg : Q01177        | 7.88  | yes | up   | 1.6E-04 | yes | chr1  | intron   | internal intron | NA  | 1.00 | no  | down | 0.09 | no  | 1.05 | no  | up   | 7.8E-06 | yes |
| MSTRG.16606.7 : Alpl : P08289            | 0.52  | yes | down | 2.4E-04 | yes | chr5  | promoter | Intermediate    | LCP | 1.36 | no  | up   | 0.09 | no  | 1.00 | no  | down | 6.2E-01 | no  |
| MSTRG.8915.1 : Rala : P63322             | 0.27  | yes | down | 4.5E-04 | yes | chr17 | promoter | Intermediate    | LCP | 0.90 | no  | down | 0.24 | no  | 0.88 | no  | down | 5.2E-09 | yes |
| MSTRG.19220.6 : Kmt2d : A0A0G2JVD6       | 6.53  | yes | up   | 2.1E-09 | yes | chr7  | exon     | last exon       | NA  | 0.78 | no  | down | 0.76 | no  | 1.03 | no  | up   | 3.5E-02 | yes |
| ENSRNOT00000085301 : Papss1 : A0A0G2K0L0 | 15.84 | yes | up   | 7.3E-05 | yes | chr2  | promoter | Intermediate    | LCP | 0.89 | no  | down | 0.82 | no  | 1.04 | no  | up   | 5.2E-04 | yes |
| MSTRG.4117.3 : Noll1 : A0A0G2K1A9        | 0.21  | yes | down | 9.6E-05 | yes | chr10 | intron   | internal intron | NA  | 1.49 | no  | up   | 0.40 | no  | 1.06 | no  | up   | 1.9E-03 | yes |
| MSTRG.21144.6 : Cab39 : A0A0G2JZH0       | 39.86 | yes | up   | 1.2E-27 | yes | chr9  | promoter | Intermediate    | LCP | 3.69 | yes | up   | 0.03 | yes | 0.99 | no  | down | 5.6E-01 | no  |
| ENSRNOT00000032865 : Lypla1 : D3ZFS7     | inf   | yes | up   | 4.0E-04 | yes | chr13 | exon     | first exon      | NA  | 0.94 | no  | down | 0.77 | no  | 1.08 | no  | up   | 2.3E-02 | yes |
| MSTRG.21202.1 : Lrrfip1 : Q66HF9         | 6.49  | yes | up   | 4.9E-10 | yes | chr9  | exon     | last exon       | NA  | 0.89 | no  | down | 0.83 | no  | 1.15 | no  | up   | 2.1E-11 | yes |
| ENSRNOT00000090942 : Yipf6 : A0A096MJG6  | inf   | yes | up   | 3.8E-06 | yes | chrX  | intron   | first intron    | NA  | 1.01 | no  | up   | 0.70 | no  | 1.03 | no  | up   | 1.9E-01 | no  |
| ENSRNOT00000093189 : Ndrgl : Q6JE36      | 0.37  | yes | down | 7.6E-09 | yes | chr7  | intron   | internal intron | NA  | 0.94 | no  | down | 0.34 | no  | 0.92 | no  | down | 4.9E-08 | yes |
| MSTRG.4725.5 : Kalrn : P97924            | 1.54  | yes | up   | 9.1E-07 | yes | chr11 | exon     | last exon       | NA  | 0.91 | no  | down | 0.83 | no  | 1.04 | no  | up   | 1.6E-04 | yes |
| ENSRNOT00000026767 : Egn1 : A0A140TAD9   | 0.32  | yes | down | 1.1E-04 | yes | chr19 | exon     | last exon       | NA  | 0.88 | no  | down | 0.36 | no  | 1.28 | yes | up   | 2.1E-09 | yes |
| ENSRNOT00000040954 : Gp1bb : Q9JJM7      | 0     | yes | down | 2.2E-04 | yes | chr11 | intron   | internal intron | NA  | 1.00 | no  | down | 0.50 | no  | 0.93 | no  | down | 7.7E-08 | yes |
| MSTRG.8345.8 : Fgfr1 : F1LM54            | 0.22  | yes | down | 3.0E-05 | yes | chr16 | exon     | last exon       | NA  | 0.71 | no  | down | 0.29 | no  | 1.05 | no  | up   | 1.3E-02 | yes |
| MSTRG.19472.3 : Dnm2 : A0A0A0MY48        | 0.11  | yes | down | 8.9E-11 | yes | chr8  | intron   | first intron    | NA  | 1.17 | no  | up   | 0.44 | no  | 1.05 | no  | up   | 2.0E-08 | yes |
| MSTRG.19194.5 : Hdac7 : A0A0G2K6B1       | 1.57  | yes | up   | 6.8E-05 | yes | chr7  | intron   | internal intron | NA  | 0.84 | no  | down | 0.34 | no  | 0.99 | no  | down | 6.7E-01 | no  |
| MSTRG.15231.5 : Tspan9 : D4AAV9          | 0.41  | yes | down | 1.4E-09 | yes | chr4  | exon     | last exon       | NA  | 1.11 | no  | up   | 0.85 | no  | 0.96 | no  | down | 2.4E-05 | yes |
| MSTRG.8514.1 : Zcchc6 : D3ZKR9           | 0.14  | yes | down | 1.2E-08 | yes | chr17 | exon     | internal exon   | NA  | 0.81 | no  | down | 0.36 | no  | 1.12 | no  | up   | 2.3E-06 | yes |
| MSTRG.11265.9 : Ubap2l : E9PTR4          | 6.62  | yes | up   | 4.0E-04 | yes | chr2  | intron   | internal intron | NA  | 1.16 | no  | up   | 0.47 | no  | 1.13 | no  | up   | 3.8E-12 | yes |
| ENSRNOT00000091574 : Apoe : P02650       | 0.23  | yes | down | 3.2E-04 | yes | chr1  | exon     | last exon       | NA  | 1.02 | no  | up   | 0.93 | no  | 0.86 | no  | down | 6.2E-12 | yes |
| MSTRG.6480.5 : Evi5 : D3ZJN9             | 4.04  | yes | up   | 4.0E-04 | yes | chr14 | intron   | internal intron | NA  | 1.65 | no  | up   | 0.49 | no  | 0.98 | no  | down | 2.5E-01 | no  |
| ENSRNOT00000017190 : Gucyl3 : P19686     | 0.26  | yes | down | 3.9E-06 | yes | chr2  | intron   | internal intron | NA  | 2.02 | yes | up   | 0.18 | no  | 0.85 | no  | down | 1.4E-12 | yes |
| ENSRNOT00000048455 : Rabgga : Q08602     | 0.13  | yes | down | 1.1E-04 | yes | chr15 | exon     | internal exon   | NA  | 1.69 | no  | up   | 0.18 | no  | 0.95 | no  | down | 1.4E-05 | yes |
| ENSRNOT00000060607 : C2 : Q6MG73         | 2.91  | yes | up   | 9.4E-08 | yes | chr20 | intron   | internal intron | NA  | 0.96 | no  | down | 0.93 | no  | 1.20 | yes | up   | 2.9E-12 | yes |
| MSTRG.6572.1 : Bmp2k : Q3SYQ0            | 11.81 | yes | up   | 5.6E-07 | yes | chr14 | intron   | internal intron | NA  | 1.04 | no  | up   | 0.49 | no  | 1.19 | no  | up   | 6.4E-09 | yes |
| ENSRNOT00000010826 : Wbp2 : G3V721       | 4.13  | yes | up   | 1.7E-04 | yes | chr10 | promoter | Intermediate    | LCP | 0.99 | no  | down | 0.87 | no  | 0.89 | no  | down | 6.1E-15 | yes |
| ENSRNOT00000017813 : Nab1 : Q62722       | 3.78  | yes | up   | 5.6E-07 | yes | chr9  | exon     | internal exon   | NA  | 1.14 | no  | up   | 0.23 | no  | 0.97 | no  | down | 6.0E-01 | no  |
| MSTRG.12277.2 : Ctnna3 : F1M4I1          | 0     | yes | down | 1.3E-06 | yes | chr20 | promoter | Distal          | LCP | 1.37 | no  | up   | 0.48 | no  | 0.92 | no  | down | 3.6E-04 | yes |
| MSTRG.15469.1 : Tram1 : Q5XI41           | 3.29  | yes | up   | 2.9E-05 | yes | chr5  | exon     | last exon       | NA  | 2.41 | yes | up   | 0.00 | yes | 1.13 | no  | up   | 1.2E-09 | yes |
| MSTRG.4335.7 : Pcyt2 : O88637            | 4.82  | yes | up   | 3.0E-05 | yes | chr10 | intron   | last intron     | NA  | 0.58 | no  | down | 0.11 | no  | 0.94 | no  | down | 1.8E-03 | yes |
| MSTRG.256.4 : Syne1 : Q8VHJ9             | 0.04  | yes | down | 1.5E-19 | yes | chr1  | exon     | first exon      | NA  | 0.23 | yes | down | 0.23 | no  | 0.89 | no  | down | 8.9E-14 | yes |
| ENSRNOT00000071020 : Rbm14 : M0R9Q1      | 0.55  | yes | down | 9.3E-08 | yes | chr1  | intron   | first intron    | NA  | 1.00 | no  | down | 0.83 | no  | 1.03 | no  | up   | 3.8E-06 | yes |
| MSTRG.12945.3 : Fmnl2 : A0A0G2K132       | 0.84  | no  | down | 6.1E-07 | yes | chr3  | intron   | internal intron | NA  | 1.21 | no  | up   | 0.24 | no  | 1.00 | no  | down | 9.6E-01 | no  |
| ENSRNOT00000076337 : Dync1li2 : Q5D023   | 0.17  | yes | down | 2.9E-04 | yes | chr19 | intron   | last intron     | NA  | 1.02 | no  | up   | 0.48 | no  | 0.99 | no  | down | 1.1E-01 | no  |
| MSTRG.10602.1 : Nnt : Q5BJ               |       |     |      |         |     |       |          |                 |     |      |     |      |      |     |      |     |      |         |     |

|                                           |       |     |      |         |     |       |          |                 |     |      |     |      |      |     |      |     |      |         |     |
|-------------------------------------------|-------|-----|------|---------|-----|-------|----------|-----------------|-----|------|-----|------|------|-----|------|-----|------|---------|-----|
| ENSRNOT00000049536 : Stat2 : Q5XI26       | 0.06  | yes | down | 1.0E-04 | yes | chr7  | promoter | Distal          | LCP | 1.26 | no  | up   | 0.43 | no  | 1.14 | no  | up   | 1.9E-09 | yes |
| MSTRG.12973.7 : Rbms1 : A0A0G2K4R7        | 0     | yes | down | 3.3E-05 | yes | chr3  | intron   | internal intron | NA  | 0.85 | no  | down | 0.53 | no  | 0.97 | no  | down | 1.2E-01 | no  |
| ENSRNOT00000018535 : Cdh11 : F1MAH6       | 1.94  | yes | up   | 2.2E-05 | yes | chr19 | exon     | last exon       | NA  | 2.28 | yes | up   | 0.48 | no  | 0.91 | no  | down | 6.5E-11 | yes |
| MSTRG.7350.5 : Ktn1 : D4A4Z9              | 2.49  | yes | up   | 1.2E-04 | yes | chr15 | intron   | internal intron | NA  | 0.95 | no  | down | 0.93 | no  | 1.04 | no  | up   | 2.2E-11 | yes |
| ENSRNOT00000080174 : Ddx39b : Q63413      | 0.02  | yes | down | 4.7E-11 | yes | chr20 | exon     | last exon       | NA  | 0.62 | no  | down | 0.48 | no  | 1.01 | no  | up   | 2.0E-01 | no  |
| MSTRG.1229.2 : Anpep : G3V7W7             | 0.25  | yes | down | 1.9E-09 | yes | chr1  | intron   | internal intron | NA  | 1.35 | no  | up   | 0.55 | no  | 1.05 | no  | up   | 3.0E-08 | yes |
| ENSRNOT00000003061 : Frl1 : D3ZQY4        | 2.76  | yes | up   | 1.7E-04 | yes | chr14 | intron   | internal intron | NA  | 0.95 | no  | down | 0.91 | no  | 1.00 | no  | down | 4.6E-01 | no  |
| MSTRG.8278.20 : Rbpms : F2Z3S5            | 0.02  | yes | down | 2.6E-05 | yes | chr16 | promoter | Proximal        | ICP | 1.19 | no  | up   | 0.36 | no  | 1.06 | no  | up   | 4.9E-05 | yes |
| MSTRG.5482.2 : Ncor2 : A0A0G2JU91         | 2.16  | yes | up   | 1.6E-06 | yes | chr12 | intron   | internal intron | NA  | 1.07 | no  | up   | 0.43 | no  | 1.01 | no  | up   | 7.1E-01 | no  |
| MSTRG.4751.2 : Pcyt1a : P19836            | 0.29  | yes | down | 1.2E-05 | yes | chr11 | exon     | first exon      | NA  | 1.53 | no  | up   | 0.05 | yes | 0.94 | no  | down | 3.3E-07 | yes |
| MSTRG.13870.6 : Plcg1 : G3V845            | 0.24  | yes | down | 1.1E-04 | yes | chr3  | intron   | first intron    | NA  | 0.90 | no  | down | 0.43 | no  | 0.94 | no  | down | 1.8E-09 | yes |
| ENSRNOT000000065759 : Plin1 : F1LSF5      | 2.99  | yes | up   | 9.0E-13 | yes | chr1  | intron   | internal intron | NA  | 1.09 | no  | up   | 0.52 | no  | 1.08 | no  | up   | 8.1E-05 | yes |
| ENSRNOT000000025232 : Bud13 : G3V8F3      | 2.30  | yes | up   | 8.0E-06 | yes | chr8  | promoter | Distal          | LCP | 0.92 | no  | down | 0.69 | no  | 1.02 | no  | up   | 2.3E-01 | no  |
| ENSRNOT00000017412 : Epb41l2 : D3ZM69     | 0.25  | yes | down | 1.1E-12 | yes | chr1  | intron   | internal intron | NA  | 0.99 | no  | down | 0.53 | no  | 0.91 | no  | down | 8.9E-11 | yes |
| ENSRNOT00000086813 : Stk38l : A4GW50      | 0.61  | yes | down | 1.5E-06 | yes | chr4  | intron   | internal intron | NA  | 1.55 | no  | up   | 0.17 | no  | 1.16 | no  | up   | 1.1E-11 | yes |
| ENSRNOT000000012545 : Clasp2 : A0A0G2JZM8 | 0.25  | yes | down | 1.3E-05 | yes | chr8  | intron   | internal intron | NA  | 1.01 | no  | up   | 0.09 | no  | 0.98 | no  | down | 1.8E-01 | no  |
| ENSRNOT00000085501 : Fgfr1op : Q4V7C1     | 7.97  | yes | up   | 2.8E-17 | yes | chr1  | intron   | internal intron | NA  | 1.17 | no  | up   | 0.39 | no  | 1.07 | no  | up   | 7.3E-04 | yes |
| MSTRG.11888.3 : Ppp1r18 : A0A0G2K8B3      | 0.32  | yes | down | 2.0E-04 | yes | chr20 | promoter | Distal          | LCP | 1.58 | no  | up   | 0.49 | no  | 1.10 | no  | up   | 1.1E-05 | yes |
| MSTRG.18880.1 : Plec : Q6S395             | 0.33  | yes | down | 4.2E-06 | yes | chr7  | exon     | last exon       | NA  | 0.61 | no  | down | 0.10 | no  | 1.03 | no  | up   | 2.2E-01 | no  |
| ENSRNOT00000024737 : Hectd3 : F1LVZ9      | 3.28  | yes | up   | 3.1E-04 | yes | chr5  | intron   | internal intron | NA  | 1.07 | no  | up   | 0.81 | no  | 0.99 | no  | down | 6.3E-01 | no  |
| ENSRNOT00000060868 : Bmp2k : F1M7M4       | 11.81 | yes | up   | 5.6E-07 | yes | chr14 | intron   | internal intron | NA  | 0.91 | no  | down | 0.28 | no  | 1.09 | no  | up   | 3.4E-07 | yes |
| MSTRG.3600.1 : Nfl : F1LM28               | 2.12  | yes | up   | 4.3E-05 | yes | chr10 | intron   | internal intron | NA  | 0.17 | yes | down | 0.09 | no  | 0.98 | no  | down | 1.9E-01 | no  |
| MSTRG.13559.1 : Hspa12b : D3ZVM5          | 0.65  | yes | down | 3.5E-04 | yes | chr3  | intron   | last intron     | NA  | 0.97 | no  | down | 0.90 | no  | 0.86 | no  | down | 5.9E-13 | yes |
| MSTRG.7470.2 : Acin1 : E9PST5             | 0.30  | yes | down | 1.1E-04 | yes | chr15 | promoter | Distal          | LCP | 0.88 | no  | down | 0.65 | no  | 0.98 | no  | down | 5.1E-04 | yes |
| MSTRG.6624.5 : Ankrd17 : D4A0B4           | 3.39  | yes | up   | 8.9E-05 | yes | chr14 | intron   | internal intron | NA  | 2.67 | yes | up   | 0.04 | yes | 1.11 | no  | up   | 1.6E-06 | yes |
| MSTRG.15356.2 : Pde3a : Q62865            | 0.30  | yes | down | 3.1E-07 | yes | chr4  | intron   | internal intron | NA  | 1.42 | no  | up   | 0.47 | no  | 1.00 | no  | up   | 9.7E-01 | no  |
| MSTRG.16327.13 : Macf1 : A0A0G2K9T4       | 0.36  | yes | down | 1.3E-05 | yes | chr5  | exon     | last exon       | NA  | 0.42 | yes | down | 0.45 | no  | 0.97 | no  | down | 9.0E-11 | yes |
| ENSRNOT00000092722 : Lamp1 : P14562       | 0.27  | yes | down | 5.9E-08 | yes | chr16 | promoter | Distal          | LCP | 1.01 | no  | up   | 0.93 | no  | 1.10 | no  | up   | 5.4E-06 | yes |
| ENSRNOT00000040808 : Tpm1 : Q923Z2        | 9.41  | yes | up   | 5.1E-14 | yes | chr8  | intron   | internal intron | NA  | 0.56 | no  | down | 0.42 | no  | 0.75 | yes | down | 6.0E-18 | yes |
| MSTRG.15231.12 : Tspan9 : D4AAV9          | 0.41  | yes | down | 1.4E-09 | yes | chr4  | exon     | last exon       | NA  | 0.51 | no  | down | 0.46 | no  | 0.96 | no  | down | 2.4E-05 | yes |
| MSTRG.2881.3 : Pkd1 : Q9ERV0              | inf   | yes | up   | 6.6E-05 | yes | chr10 | intron   | internal intron | NA  | 1.03 | no  | up   | 0.28 | no  | 1.19 | no  | up   | 9.8E-07 | yes |
| ENSRNOT000000019761 : Pig1 : D4A604       | 29.04 | yes | up   | 1.4E-06 | yes | chr3  | intron   | internal intron | NA  | 0.96 | no  | down | 0.59 | no  | 1.02 | no  | up   | 5.9E-02 | no  |
| MSTRG.18995.2 : Gtbbp1 : D2XV59           | 2.18  | yes | up   | 7.2E-06 | yes | chr7  | exon     | last exon       | NA  | 1.09 | no  | up   | 0.78 | no  | 0.97 | no  | down | 3.4E-03 | yes |
| MSTRG.12174.3 : Col18a1 : F1LR02          | 0.22  | yes | down | 4.1E-11 | yes | chr20 | exon     | internal exon   | NA  | 1.20 | no  | up   | 0.75 | no  | 1.03 | no  | up   | 3.6E-07 | yes |
| ENSRNOT00000067636 : Vps41 : D3ZVH6       | 0.30  | yes | down | 1.3E-06 | yes | chr17 | intron   | internal intron | NA  | 1.06 | no  | up   | 0.34 | no  | 1.02 | no  | up   | 4.2E-02 | yes |
| MSTRG.15089.3 : Csgalnact2 : D4A5Z0       | 2.74  | yes | up   | 6.9E-07 | yes | chr4  | intron   | internal intron | NA  | 0.86 | no  | down | 0.45 | no  | 0.94 | no  | down | 1.2E-02 | yes |
| MSTRG.8278.46 : Rbpms : F2Z3S5            | 0.02  | yes | down | 2.6E-05 | yes | chr16 | promoter | Proximal        | ICP | 0.92 | no  | down | 0.67 | no  | 1.06 | no  | up   | 4.9E-05 | yes |
| MSTRG.7309.2 : Flnb : D4A8D5              | 1.70  | yes | up   | 8.8E-05 | yes | chr15 | intron   | last intron     | NA  | 0.74 | no  | down | 0.17 | no  | 1.00 | no  | up   | 2.4E-01 | no  |
| ENSRNOT000000065636 : Htatsf1 : D4A997    | 6.87  | yes | up   | 2.7E-04 | yes | chrX  | promoter | Intermediate    | HCP | 2.28 | yes | up   | 0.02 | yes | 0.95 | no  | down | 9.0E-07 | yes |
| MSTRG.18072.8 : Dgka : P51556             | 0.72  | yes | down | 1.5E-04 | yes | chr7  | exon     | internal exon   | NA  | 1.46 | no  | up   | 0.19 | no  | 0.95 | no  | down | 8.8E-04 | yes |
| MSTRG.15778.1 : Ncbp1 : Q56A27            | 0.31  | yes | down | 1.1E-07 | yes | chr5  | intron   | internal intron | NA  | 0.99 | no  | down | 0.97 | no  | 1.00 | no  | up   | 9.4E-01 | no  |
| ENSRNOT00000018942 : Mccc1 : F1LP30       | 0.34  | yes | down | 1.3E-04 | yes | chr2  | intron   | internal intron | NA  | 1.14 | no  | up   | 0.27 | no  | 0.96 | no  | down | 1.3E-08 | yes |
| ENSRNOT00000003106 : Hnmpdl : A0A0G2KAZ7  | inf   | yes | up   | 7.6E-05 | yes | chr14 | intron   | first intron    | NA  | 0.94 | no  | down | 0.83 | no  | 0.99 | no  | down | 4.6E-01 | no  |
| MSTRG.20742.3 : Dst : D3ZC56              | 0.35  | yes | down | 1.3E-05 | yes | chr9  | intron   | internal intron | NA  | 0.95 | no  | down | 0.55 | no  | 1.03 | no  | up   | 7.3E-04 | yes |
| ENSRNOT000000016285 : Kdelc1 : B5DFA5     | 5.54  | yes | up   | 1.1E-06 | yes | chr9  | exon     | last exon       | NA  | 1.21 | no  | up   | 0.36 | no  | 0.94 | no  | down | 8.4E-02 | no  |
| MSTRG.13167.1 : Nup160 : D3ZBL6           | 14.66 | yes | up   | 4.1E-04 | yes | chr3  | intron   | internal intron | NA  | 1.19 | no  | up   | 0.19 | no  | 1.00 | no  | down | 6.2E-01 | no  |
| MSTRG.20352.7 : Ubp1 : D4A030             | 0.44  | yes | down | 2.3E-04 | yes | chr8  | intron   | internal intron | NA  | 1.71 | no  | up   | 0.08 | no  | 0.98 | no  | down | 1.9E-01 | no  |
| MSTRG.6624.9 : Ankrd17 : D4A0B4           | 3.39  | yes | up   | 8.9E-05 | yes | chr14 | intron   | internal intron | NA  | 0.65 | no  | down | 0.61 | no  | 1.11 | no  | up   | 1.6E-06 | yes |
| ENSRNOT00000025845 : Lipa : Q64194        | 35.26 | yes | up   | 5.1E-18 | yes | chr1  | intron   | internal intron | NA  | 2.12 | yes | up   | 0.20 | no  | 1.02 | no  | up   | 6.9E-02 | no  |
| MSTRG.21926.3 : Pls3 : F1LPK7             | 0     | yes | down | 1.5E-04 | yes | chrX  | intron   | internal intron | NA  | 1.36 | no  | up   | 0.75 | no  | 1.11 | no  | up   | 9.8E-14 | yes |
| MSTRG.6480.3 : Evi5 : D3ZJN9              | 4.04  | yes | up   | 4.0E-04 | yes | chr14 | intron   | internal intron | NA  | 1.45 | no  | up   | 0.74 | no  | 0.98 | no  | down | 2.5E-01 | no  |
| MSTRG.2839.4 : Srm2 : A0A0G2K2M9          | 1.72  | yes | up   | 9.0E-05 | yes | chr10 | exon     | internal exon   | NA  | 0.80 | no  | down | 0.83 | no  | 1.00 | no  | up   | 9.0E-01 | no  |
| MSTRG.12240.9 : Bicc1 : A0A0G2K0Y0        | 5.19  | yes | up   | 5.0E-04 | yes | chr20 | intron   | internal intron | NA  | 0.92 | no  | down | 0.51 | no  | 1.52 | yes | up   | 1.2E-05 | yes |
| MSTRG.18880.2 : Plec : Q6S3A0             | 0.33  | yes | down | 4.2E-06 | yes | chr7  | exon     | last exon       | NA  | 1.39 | no  | up   | 0.52 | no  | 1.11 | no  | up   | 6.0E-08 | yes |
| MSTRG.1443.5 : Arap1 : F1LM60             | 2.71  | yes | up   | 3.3E-04 | yes | chr1  | intron   | first intron    | NA  | 1.33 | no  | up   | 0.28 | no  | 0.99 | no  | down | 2.5E-02 | yes |
| MSTRG.19088.4 : Scube1 : F1M987           | 2.13  | yes | up   | 1.3E-04 | yes | chr7  | intron   | internal intron | NA  | 1.08 | no  | up   | 0.10 | no  | 0.80 | yes | down | 1.2E-14 | yes |
| MSTRG.10916.2 : Naa15 : D3ZD89            | 0.53  | yes | down | 3.9E-04 | yes | chr2  | exon     | last exon       | NA  | 0.99 | no  | down | 0.00 | yes | 1.05 | no  | up   | 5.6E-06 | yes |
| MSTRG.4992.4 : Top3b : D4A9Z2             | 11.41 | yes | up   | 1.2E-04 | yes | chr11 | intron   | last intron     | NA  | 0.60 | no  | down | 0.31 | no  | 0.99 | no  | down | 6.1E-01 | no  |
| MSTRG.8278.38 : Rbpms : F2Z3S5            | 0.02  | yes | down | 2.6E-05 | yes | chr16 | promoter | Proximal        | ICP | 0.96 | no  | down | 0.82 | no  | 1.06 | no  | up   | 4.9E-05 | yes |
| ENSRNOT00000019703 : Golga1 : D4A6K4      | 0.04  | yes | down | 1.1E-04 | yes | chr3  | intron   | internal intron | NA  | 1.18 | no  | up   | 0.06 | no  | 1.12 | no  | up   | 8.2E-05 | yes |
| MSTRG.11405.9 : Pde4dip : A0A0G2JW66      | 6.94  | yes | up   | 5.0E-08 | yes | chr2  | exon     | internal exon   | NA  | 1.63 | no  | up   | 0.16 | no  | 1.06 | no  | up   | 5.1E-04 | yes |
| MSTRG.8018.2 : Use1 : B0BNG6              | 3.16  | yes | up   | 2.8E-15 | yes | chr16 | intron   | internal intron | NA  | 0.63 | no  | down | 0.09 | no  | 1.02 | no  | up   | 5.2E-02 | no  |
| ENSRNOT00000084571 : Syne1 : Q8VHJ9       | 0.04  | yes | down | 1.5E-19 | yes | chr1  | exon     | first exon      | NA  | 1.00 | no  | down | 0.06 | no  | 0.89 | no  | down | 8.9E-14 | yes |
| ENSRNOT000000046126 : Kars : Q5XIM7       | 16.06 | yes | up   | 5.9E-09 | yes | chr19 | exon     | last exon       | NA  | 0.86 | no  | down | 0.63 | no  | 0.95 | no  | down | 1.9E-07 | yes |
| MSTRG.7470.6 : Acin1 : E9PST5             | 0.30  | yes | down | 1.1E-04 | yes | chr15 | promoter | Distal          | LCP | 1.22 | no  | up   | 0.28 | no  | 0.98 | no  | down | 5.1E-04 | yes |
| ENSRNOT00000056430 : Fer : A0A140TAC4     | 3.31  | yes | up   | 2.7E-04 | yes | chr9  | promoter | Proximal        | LCP | 0.98 | no  | down | 0.48 | no  | 0.92 | no  | down | 7.3E-07 | yes |
| ENSRNOT00000078532 : Klff6 : G3V880       | 14.58 | yes | up   | 4.1E-04 | yes | chr17 | intron   | internal intron | NA  | 0.91 | no  | down | 0.69 | no  | 0.81 | yes | down | 4.1E-06 | yes |
| MSTRG.20753.1 : Ptpn18 : Q4KM54           | 0     | yes | down | 1.9E-04 | yes | chr9  | intron   | first intron    | NA  | 1.59 | no  | up   | 0.04 | yes | 1.20 | no  | up   | 1.2E-08 | yes |
| MSTRG.3949.4 : Dhx58 : D3ZD46             | 5.00  | yes | up   | 2.1E-04 | yes | chr10 | exon     | internal exon   | NA  | 1.11 | no  | up   | 0.72 | no  | 1.22 | yes | up   | 6.3E-08 | yes |
| MSTRG.8278.42 : Rbpms : F2Z3S5            | 0.02  | yes | down | 2.6E-05 | yes | chr16 | promoter | Proximal        | ICP | 0.24 | yes | down | 0.05 | yes | 1.06 | no  | up   | 4.9E-05 | yes |
| ENSRNOT00000093322 : Ndr1 : Q6JE36        | 0.37  | yes | down | 7.6E-09 | yes | chr7  | intron   | internal intron | NA  | 0.96 | no  | down | 0.31 | no  | 0.92 | no  | down | 4.9E-08 | yes |

|                                          |       |     |      |         |     |       |          |                 |     |       |     |      |      |     |      |     |      |         |     |
|------------------------------------------|-------|-----|------|---------|-----|-------|----------|-----------------|-----|-------|-----|------|------|-----|------|-----|------|---------|-----|
| MSTRG.12240.10 : Bicc1 : A0A0G2K0Y0      | 5.19  | yes | up   | 5.0E-04 | yes | chr20 | intron   | internal intron | NA  | 1.01  | no  | up   | 0.93 | no  | 1.52 | yes | up   | 1.2E-05 | yes |
| MSTRG.7470.14 : Acin1 : E9PST5           | 0.30  | yes | down | 1.1E-04 | yes | chr15 | promoter | Distal          | LCP | 1.22  | no  | up   | 0.66 | no  | 0.98 | no  | down | 5.1E-04 | yes |
| MSTRG.14695.2 : Ptc3 : D3ZGM1            | 3.88  | yes | up   | 4.1E-35 | yes | chr4  | intron   | internal intron | NA  | 1.05  | no  | up   | 0.88 | no  | 0.98 | no  | down | 3.1E-01 | no  |
| MSTRG.1443.10 : Arap1 : F1LM60           | 2.71  | yes | up   | 3.3E-04 | yes | chr1  | intron   | first intron    | NA  | 1.69  | no  | up   | 0.06 | no  | 0.99 | no  | down | 2.5E-02 | yes |
| MSTRG.18129.2 : Nfic : O70188            | 1.68  | yes | up   | 1.4E-06 | yes | chr7  | intron   | internal intron | NA  | 1.38  | no  | up   | 0.42 | no  | 0.85 | no  | down | 3.8E-12 | yes |
| MSTRG.1333.3 : Dlg2 : F1M907             | 2.35  | yes | up   | 1.4E-05 | yes | chr1  | intron   | internal intron | NA  | 1.39  | no  | up   | 0.64 | no  | 0.92 | no  | down | 2.8E-06 | yes |
| MSTRG.18046.2 : Pan2 : R9PXX6            | 2.14  | yes | up   | 4.2E-04 | yes | chr7  | exon     | internal exon   | NA  | 1.24  | no  | up   | 0.65 | no  | 0.84 | no  | down | 1.2E-03 | yes |
| MSTRG.13128.2 : Itgav : F1LZX9           | 24.74 | yes | up   | 1.9E-17 | yes | chr3  | intron   | first intron    | NA  | 1.29  | no  | up   | 0.38 | no  | 0.92 | no  | down | 1.7E-15 | yes |
| ENSRNOT00000078585 : Lsm14a : A0A0G2JUK2 | 0.31  | yes | down | 3.8E-04 | yes | chr1  | intron   | last intron     | NA  | 2.34  | yes | up   | 0.23 | no  | 1.02 | no  | up   | 2.8E-01 | no  |
| MSTRG.7835.1 : Tm9sf2 : Q66HG5           | 0.39  | yes | down | 9.3E-05 | yes | chr15 | intron   | last intron     | NA  | 1.02  | no  | up   | 0.94 | no  | 1.03 | no  | up   | 6.1E-04 | yes |
| MSTRG.8514.6 : Zcchc6 : D3ZKR9           | 0.14  | yes | down | 1.2E-08 | yes | chr17 | exon     | internal exon   | NA  | 1.15  | no  | up   | 0.32 | no  | 1.12 | no  | up   | 2.3E-06 | yes |
| ENSRNOT00000040762 : Plec : Q6S3A0       | 0.33  | yes | down | 4.2E-06 | yes | chr7  | exon     | last exon       | NA  | 1.05  | no  | up   | 0.87 | no  | 1.11 | no  | up   | 6.0E-08 | yes |
| ENSRNOT00000004290 : Timp2 : P30121      | 3.20  | yes | up   | 1.5E-04 | yes | chr10 | exon     | first exon      | NA  | 1.25  | no  | up   | 0.14 | no  | 1.01 | no  | up   | 5.4E-01 | no  |
| ENSRNOT00000025415 : Picalm : A0A1B0GWW9 | 8.74  | yes | up   | 2.1E-13 | yes | chr1  | intron   | internal intron | NA  | 0.69  | no  | down | 0.22 | no  | 1.04 | no  | up   | 1.0E-01 | no  |
| ENSRNOT00000088073 : Il4r : Q63257       | 9.80  | yes | up   | 2.9E-08 | yes | chr1  | intron   | internal intron | NA  | 1.00  | no  | down | 0.83 | no  | 1.11 | no  | up   | 2.1E-05 | yes |
| MSTRG.20817.13 : Map4k4 : A0A0G2K7W4     | 0.36  | yes | down | 7.1E-05 | yes | chr9  | intron   | internal intron | NA  | 0.74  | no  | down | 0.56 | no  | 1.10 | no  | up   | 7.1E-06 | yes |
| MSTRG.14053.2 : Dido1 : D3ZWL9           | 2.83  | yes | up   | 7.0E-07 | yes | chr3  | intron   | internal intron | NA  | 0.67  | no  | down | 0.51 | no  | 1.01 | no  | up   | 2.0E-01 | no  |
| MSTRG.12668.2 : Nup188 : F1LRC6          | 0.22  | yes | down | 2.3E-05 | yes | chr3  | exon     | internal exon   | NA  | 1.42  | no  | up   | 0.31 | no  | 1.02 | no  | up   | 1.9E-01 | no  |
| ENSRNOT00000083528 : Sptbn1 : A0A0G2K8W9 | 5.72  | yes | up   | 4.0E-04 | yes | chr14 | intron   | internal intron | NA  | 1.05  | no  | up   | 0.57 | no  | 0.87 | no  | down | 1.1E-18 | yes |
| ENSRNOT00000026941 : Speg : Q63638       | 0.17  | yes | down | 2.6E-06 | yes | chr9  | intron   | internal intron | NA  | 1.03  | no  | up   | 0.94 | no  | 0.88 | no  | down | 2.3E-07 | yes |
| ENSRNOT00000013189 : Dido1 : D3ZWL9      | 2.83  | yes | up   | 7.0E-07 | yes | chr3  | intron   | internal intron | NA  | 0.96  | no  | down | 0.20 | no  | 1.01 | no  | up   | 2.0E-01 | no  |
| MSTRG.16897.2 : Atf2 : F1LQ09            | 2.32  | yes | up   | 2.9E-04 | yes | chr6  | intron   | last intron     | NA  | 1.29  | no  | up   | 0.06 | no  | 0.95 | no  | down | 8.9E-05 | yes |
| MSTRG.19305.1 : Krt8 : Q10758            | 0.19  | yes | down | 1.4E-04 | yes | chr7  | exon     | last exon       | NA  | 0.89  | no  | down | 0.17 | no  | 0.83 | yes | down | 4.5E-14 | yes |
| ENSRNOT00000024068 : P2rx1 : B7U2F3      | 5.09  | yes | up   | 1.5E-10 | yes | chr10 | promoter | Intermediate    | LCP | 0.81  | no  | down | 0.48 | no  | 0.82 | yes | down | 1.7E-12 | yes |
| MSTRG.18557.6 : Mon2 : D3ZCG3            | 0.07  | yes | down | 1.5E-08 | yes | chr7  | intron   | internal intron | NA  | 0.78  | no  | down | 0.45 | no  | 1.05 | no  | up   | 7.1E-07 | yes |
| ENSRNOT000000076604 : Dyncl1i2 : Q5D023  | 0.17  | yes | down | 2.9E-04 | yes | chr19 | intron   | last intron     | NA  | 1.20  | no  | up   | 0.30 | no  | 0.99 | no  | down | 1.1E-01 | no  |
| ENSRNOT00000027045 : Thop1 : P24155      | 0.11  | yes | down | 2.2E-07 | yes | chr7  | exon     | last exon       | NA  | 1.02  | no  | up   | 0.82 | no  | 0.92 | no  | down | 9.5E-13 | yes |
| MSTRG.2579.2 : Sfxn3 : Q6P6T0            | 0.39  | yes | down | 7.8E-05 | yes | chr1  | intron   | internal intron | NA  | 0.37  | yes | down | 0.20 | no  | 1.12 | no  | up   | 6.4E-07 | yes |
| MSTRG.11223.3 : Fdps : F1LND7            | inf   | yes | up   | 2.2E-05 | yes | chr2  | exon     | last exon       | NA  | 0.68  | no  | down | 0.08 | no  | 1.07 | no  | up   | 1.2E-03 | yes |
| ENSRNOT00000042103 : Fmn1 : D4A7C2       | 4.93  | yes | up   | 1.3E-26 | yes | chr3  | intron   | internal intron | NA  | 1.00  | no  | down | 0.76 | no  | 1.33 | yes | up   | 4.7E-13 | yes |
| MSTRG.20352.13 : Ubp1 : D4A030           | 0.44  | yes | down | 2.3E-04 | yes | chr8  | intron   | internal intron | NA  | 1.08  | no  | up   | 0.57 | no  | 0.98 | no  | down | 1.9E-01 | no  |
| ENSRNOT000000050733 : Pds5b : D3ZU56     | 0.26  | yes | down | 2.1E-04 | yes | chr12 | promoter | Intermediate    | LCP | 1.02  | no  | up   | 0.05 | yes | 0.96 | no  | down | 4.7E-06 | yes |
| MSTRG.8948.1 : Mtpap : D3ZPN5            | 1.99  | yes | up   | 1.4E-05 | yes | chr17 | intron   | internal intron | NA  | 0.98  | no  | down | 0.90 | no  | 1.03 | no  | up   | 1.2E-01 | no  |
| MSTRG.16327.16 : Macf1 : A0A0G2K9T4      | 0.36  | yes | down | 1.3E-05 | yes | chr5  | exon     | last exon       | NA  | 0.73  | no  | down | 0.81 | no  | 0.97 | no  | down | 9.0E-11 | yes |
| MSTRG.22089.5 : Htatsf1 : D4A997         | 6.87  | yes | up   | 2.7E-04 | yes | chrX  | promoter | Intermediate    | HCP | 0.91  | no  | down | 0.68 | no  | 0.95 | no  | down | 9.0E-07 | yes |
| MSTRG.8992.3 : Dip2c : D3ZZB0            | 0.67  | yes | down | 4.5E-04 | yes | chr17 | intron   | internal intron | NA  | 0.90  | no  | down | 0.70 | no  | 0.88 | no  | down | 3.3E-04 | yes |
| MSTRG.20878.7 : Glis : P13264            | 0.05  | yes | down | 1.5E-13 | yes | chr9  | intron   | first intron    | NA  | 1.00  | no  | down | 0.99 | no  | 1.08 | no  | up   | 4.1E-02 | yes |
| MSTRG.2768.2 : Usp7 : F1LM09             | inf   | yes | up   | 5.0E-04 | yes | chr10 | intron   | internal intron | NA  | 0.96  | no  | down | 0.96 | no  | 1.00 | no  | down | 7.8E-01 | no  |
| MSTRG.19194.2 : Hdac7 : A0A0G2K6B1       | 1.57  | yes | up   | 6.8E-05 | yes | chr7  | intron   | internal intron | NA  | 1.00  | no  | down | 1.00 | no  | 0.99 | no  | down | 6.7E-01 | no  |
| ENSRNOT00000025711 : D2hgdh : P84850     | 0.09  | yes | down | 4.1E-04 | yes | chr9  | exon     | first exon      | NA  | 0.90  | no  | down | 0.75 | no  | 0.95 | no  | down | 7.7E-05 | yes |
| MSTRG.11091.5 : Gucyl1a3 : P19686        | 0.26  | yes | down | 3.9E-06 | yes | chr2  | intron   | internal intron | NA  | 0.69  | no  | down | 0.54 | no  | 0.85 | no  | down | 1.4E-12 | yes |
| MSTRG.21170.2 : Gigyl2 : A0A096MKC0      | 0.59  | yes | down | 1.9E-05 | yes | chr9  | intron   | internal intron | NA  | 0.96  | no  | down | 0.71 | no  | 1.01 | no  | up   | 7.0E-01 | no  |
| ENSRNOT00000074829 : Pdia6 : Q63081      | 0.09  | yes | down | 1.3E-04 | yes | chr6  | intron   | internal intron | NA  | 1.30  | no  | up   | 0.09 | no  | 1.12 | no  | up   | 2.7E-12 | yes |
| MSTRG.5906.5 : Atp2b4 : Q64542           | 2.31  | yes | up   | 1.3E-05 | yes | chr13 | intron   | internal intron | NA  | 1.10  | no  | up   | 0.50 | no  | 0.68 | yes | down | 2.6E-19 | yes |
| ENSRNOT000000075978 : Dyncl1i2 : Q5D023  | 0.17  | yes | down | 2.9E-04 | yes | chr19 | intron   | last intron     | NA  | 0.99  | no  | down | 0.94 | no  | 0.99 | no  | down | 1.1E-01 | no  |
| ENSRNOT00000012725 : Tf : A0A0G2QC06     | 5.10  | yes | up   | 5.5E-06 | yes | chr8  | intron   | first intron    | NA  | 1.07  | no  | up   | 0.37 | no  | 1.08 | no  | up   | 1.0E-13 | yes |
| MSTRG.5410.6 : Gtf2i : Q5U2Y1            | 5.31  | yes | up   | 4.9E-06 | yes | chr12 | promoter | Distal          | LCP | 0.93  | no  | down | 0.51 | no  | 0.95 | no  | down | 1.5E-07 | yes |
| ENSRNOT00000088370 : Stim1 : P84903      | 2.61  | yes | up   | 1.3E-04 | yes | chr1  | exon     | last exon       | NA  | 0.79  | no  | down | 0.56 | no  | 0.92 | no  | down | 3.4E-08 | yes |
| ENSRNOT00000001201 : Hsph1 : Q66HA8      | inf   | yes | up   | 3.0E-05 | yes | chr12 | intron   | internal intron | NA  | 0.98  | no  | down | 0.96 | no  | 1.12 | no  | up   | 9.8E-13 | yes |
| ENSRNOT00000067616 : Ece1 : Q6IN10       | 0.58  | yes | down | 9.3E-05 | yes | chr5  | intron   | internal intron | NA  | 17.01 | yes | up   | 0.11 | no  | 1.14 | no  | up   | 8.3E-15 | yes |
| MSTRG.1466.1 : Trim21 : D4ACF2           | 0.20  | yes | down | 5.7E-10 | yes | chr1  | promoter | Distal          | LCP | 1.24  | no  | up   | 0.32 | no  | 0.96 | no  | down | 1.3E-04 | yes |
| ENSRNOT00000023605 : Tpm3 : Q63610       | 0.37  | yes | down | 8.0E-05 | yes | chr2  | intron   | internal intron | NA  | 0.91  | no  | down | 0.63 | no  | 1.11 | no  | up   | 3.2E-12 | yes |
| MSTRG.20035.1 : Filip1 : F1LM79          | 4.15  | yes | up   | 2.1E-10 | yes | chr8  | exon     | first exon      | NA  | 0.91  | no  | down | 0.61 | no  | 1.01 | no  | up   | 3.0E-01 | no  |
| ENSRNOT00000093012 : Stim1 : P84903      | 2.61  | yes | up   | 1.3E-04 | yes | chr1  | exon     | last exon       | NA  | 1.05  | no  | up   | 0.09 | no  | 0.92 | no  | down | 3.4E-08 | yes |
| MSTRG.16517.4 : Slc9a1 : Q8R4H8          | 0.61  | yes | down | 7.2E-05 | yes | chr5  | intron   | internal intron | NA  | 2.17  | yes | up   | 0.08 | no  | 1.05 | no  | up   | 2.8E-01 | no  |
| ENSRNOT00000008222 : Pawr : G3V6S1       | 4.33  | yes | up   | 2.3E-06 | yes | chr7  | intron   | last intron     | NA  | 1.26  | no  | up   | 0.47 | no  | 1.06 | no  | up   | 9.6E-07 | yes |
| MSTRG.21039.5 : Tns1 : F1LN42            | 0.09  | yes | down | 2.0E-04 | yes | chr9  | intron   | last intron     | NA  | 1.04  | no  | up   | 0.95 | no  | 0.86 | no  | down | 7.8E-19 | yes |
| MSTRG.19088.6 : Scube1 : F1M987          | 2.13  | yes | up   | 1.3E-04 | yes | chr7  | intron   | internal intron | NA  | 1.19  | no  | up   | 0.22 | no  | 0.80 | yes | down | 1.2E-14 | yes |
| ENSRNOT00000092870 : Gtf2i : Q5U2Y1      | 5.31  | yes | up   | 4.9E-06 | yes | chr12 | promoter | Distal          | LCP | 1.06  | no  | up   | 0.75 | no  | 0.95 | no  | down | 1.5E-07 | yes |
| ENSRNOT00000079508 : Wdr72 : A0A0G2K3H7  | 1.90  | yes | up   | 4.4E-07 | yes | chr8  | promoter | Distal          | LCP | 0.98  | no  | down | 0.19 | no  | 1.14 | no  | up   | 5.6E-05 | yes |
| MSTRG.8517.1 : Naa35 : Q6DKG0            | inf   | yes | up   | 1.7E-04 | yes | chr17 | promoter | Proximal        | LCP | 0.81  | no  | down | 0.27 | no  | 1.04 | no  | up   | 3.3E-02 | yes |
| MSTRG.16771.2 : H6pd : D4A7D7            | 0.22  | yes | down | 2.6E-06 | yes | chr5  | intron   | last intron     | NA  | 0.65  | no  | down | 0.40 | no  | 1.14 | no  | up   | 9.6E-15 | yes |
| ENSRNOT00000067018 : Acaa2 : G3V9U2      | 0.52  | yes | down | 2.2E-04 | yes | chr18 | exon     | last exon       | NA  | 0.82  | no  | down | 0.15 | no  | 1.00 | no  | up   | 7.4E-01 | no  |
| MSTRG.6635.1 : Rufy3 : A0A0G2K6A9        | 2.37  | yes | up   | 3.9E-04 | yes | chr14 | promoter | Distal          | LCP | 0.85  | no  | down | 0.67 | no  | 1.11 | no  | up   | 1.3E-05 | yes |
| MSTRG.3468.1 : Pafah1b1 : P63004         | 0.19  | yes | down | 5.9E-04 | yes | chr10 | intron   | internal intron | NA  | 1.00  | no  | down | 0.48 | no  | 0.96 | no  | down | 1.4E-04 | yes |
| MSTRG.8345.11 : Fgfr1 : F1LM54           | 0.22  | yes | down | 3.0E-05 | yes | chr16 | exon     | last exon       | NA  | 0.69  | no  | down | 0.25 | no  | 1.05 | no  | up   | 1.3E-02 | yes |
| ENSRNOT00000064288 : Lims1 : C0KUC5      | 12.34 | yes | up   | 5.9E-05 | yes | chr20 | intron   | internal intron | NA  | 1.20  | no  | up   | 0.33 | no  | 0.77 | yes | down | 1.9E-12 | yes |
| ENSRNOT00000019536 : Armc8 : B4F7A2      | 0.25  | yes | down | 7.8E-05 | yes | chr8  | exon     | first exon      | NA  | 1.05  | no  | up   | 0.73 | no  | 0.97 | no  | down | 2.3E-03 | yes |
| MSTRG.17811.5 : Mark3 : F1M836           | 0.30  | yes | down | 2.6E-04 | yes | chr6  | exon     | last exon       | NA  | 1.03  | no  | up   | 0.66 | no  | 1.10 | no  | up   | 4.1E-07 | yes |
| MSTRG.7226.6 : Sec24c : A0A0G2JZF0       | 3.50  | yes | up   | 1.3E-09 | yes | chr15 | intron   | internal intron | NA  | 1.06  | no  | up   | 0.77 | no  | 1.01 | no  | up   | 2.6E-01 | no  |
| ENSRNOT00000077261 : Slfn13 : A0A096MKD0 | 2.27  | yes | up   | 1.5E-04 | yes | chr10 | promoter | Intermediate    | LCP | 1.42  | no  | up   | 0.13 | no  | 0.97 | no  | down | 2.7E-02 | yes |
| M                                        |       |     |      |         |     |       |          |                 |     |       |     |      |      |     |      |     |      |         |     |

|                                                |       |      |         |         |      |          |              |                 |      |      |      |      |      |      |      |     |         |         |     |
|------------------------------------------------|-------|------|---------|---------|------|----------|--------------|-----------------|------|------|------|------|------|------|------|-----|---------|---------|-----|
| MSTRG.19219.3 : Fkbp11 : G3V7V5                | inf   | yes  | up      | 4.7E-06 | yes  | chr7     | intron       | internal intron | NA   | 0.86 | no   | down | 0.61 | no   | 1.06 | no  | up      | 1.6E-07 | yes |
| MSTRG.2839.5 : Srrm2 : A0A0G2K2M9              | 1.72  | yes  | up      | 9.0E-05 | yes  | chr10    | exon         | internal exon   | NA   | 1.20 | no   | up   | 0.82 | no   | 1.00 | no  | up      | 9.0E-01 | no  |
| MSTRG.5417.7 : Aut5 : F1M388                   | 0.04  | yes  | down    | 4.8E-14 | yes  | chr12    | intron       | internal intron | NA   | 0.80 | no   | down | 0.38 | no   | 1.01 | no  | up      | 5.6E-01 | no  |
| ENSRNOT00000025067 : Hspa5 : P06761            | 0.56  | yes  | down    | 2.4E-04 | yes  | chr3     | intron       | internal intron | NA   | 1.09 | no   | up   | 0.87 | no   | 1.06 | no  | up      | 6.4E-09 | yes |
| MSTRG.19777.1 : Sin3a : A0A0G2K3H5             | 0.53  | yes  | down    | 4.1E-06 | yes  | chr8     | intron       | last intron     | NA   | 1.15 | no   | up   | 0.47 | no   | 0.96 | no  | down    | 6.2E-05 | yes |
| MSTRG.5723.3 : Ttc28 : D3ZXP1                  | 4.41  | yes  | up      | 1.9E-04 | yes  | chr12    | promoter     | Intermediate    | LCP  | 2.06 | yes  | up   | 0.05 | yes  | 0.86 | no  | down    | 6.9E-05 | yes |
| ENSRNOT00000012334 : Col5a1 : A0A0G2JX47       | 0.33  | yes  | down    | 4.5E-04 | yes  | chr3     | intron       | internal intron | NA   | 0.89 | no   | down | 0.53 | no   | 1.01 | no  | up      | 4.0E-01 | no  |
| MSTRG.5897.1 : Cntn2 : G3V758                  | 2.37  | yes  | up      | 8.3E-06 | yes  | chr13    | exon         | internal exon   | NA   | 1.00 | no   | down | 0.50 | no   | 1.00 | no  | down    | 9.1E-01 | no  |
| ENSRNOT00000001115 : Ddx39b : Q63413           | 0.02  | yes  | down    | 4.7E-11 | yes  | chr20    | exon         | last exon       | NA   | 2.53 | yes  | up   | 0.10 | no   | 1.01 | no  | up      | 2.0E-01 | no  |
| MSTRG.4525.6 : Mx1 : Q499S4                    | 3.65  | yes  | up      | 1.1E-13 | yes  | chr11    | intron       | internal intron | NA   | 2.23 | yes  | up   | 0.51 | no   | 1.36 | yes | up      | 1.2E-13 | yes |
| MSTRG.12274.1 : Ctnna3 : F1M4I1                | 0     | yes  | down    | 1.3E-06 | yes  | chr20    | promoter     | Distal          | LCP  | 0.77 | no   | down | 0.44 | no   | 0.92 | no  | down    | 3.6E-04 | yes |
| MSTRG.11964.6 : Ddx39b : Q63413                | 0.02  | yes  | down    | 4.7E-11 | yes  | chr20    | exon         | last exon       | NA   | 0.33 | yes  | down | 0.28 | no   | 1.01 | no  | up      | 2.0E-01 | no  |
| ENSRNOT00000020910 : Rftn2 : D3ZIII            | 34.41 | yes  | up      | 1.8E-14 | yes  | chr9     | exon         | last exon       | NA   | 0.98 | no   | down | 0.93 | no   | 0.99 | no  | down    | 8.1E-01 | no  |
| MSTRG.10716.3 : Trio : F1M0Z1                  | 0.35  | yes  | down    | 1.6E-06 | yes  | chr2     | exon         | first exon      | NA   | 0.97 | no   | down | 0.86 | no   | 1.02 | no  | up      | 2.1E-02 | yes |
| ENSRNOT00000010101 : Lgm1 : Q5PPG2             | 2.26  | yes  | up      | 3.7E-04 | yes  | chr6     | intron       | internal intron | NA   | 1.42 | no   | up   | 0.28 | no   | 1.15 | no  | up      | 3.3E-08 | yes |
| MSTRG.15231.4 : Tspan9 : D4AAV9                | 0.41  | yes  | down    | 1.4E-09 | yes  | chr4     | exon         | last exon       | NA   | 0.74 | no   | down | 0.50 | no   | 0.96 | no  | down    | 2.4E-05 | yes |
| ENSRNOT00000076460 : Parp4 : A0A096MJ98        | 1.23  | yes  | up      | 1.1E-06 | yes  | chr15    | intron       | last intron     | NA   | 0.92 | no   | down | 0.11 | no   | 1.00 | no  | down    | 9.9E-01 | no  |
| ENSRNOT00000082549 : Neb1 : F1LVX3             | 0     | yes  | down    | 3.8E-04 | yes  | chr17    | intron       | first intron    | NA   | 0.89 | no   | down | 0.40 | no   | 1.02 | no  | up      | 2.0E-01 | no  |
| ENSRNOT00000039353 : Eogt : Q5NDL0             | 6.71  | yes  | up      | 1.7E-04 | yes  | chr4     | intron       | internal intron | NA   | 1.08 | no   | up   | 0.10 | no   | 1.10 | no  | up      | 2.0E-05 | yes |
| MSTRG.8552.9 : Ddx46 : Q62780                  | 0.56  | yes  | down    | 3.4E-04 | yes  | chr17    | intron       | internal intron | NA   | 0.82 | no   | down | 0.28 | no   | 0.98 | no  | down    | 1.3E-01 | no  |
| ENSRNOT00000029510 : Manse1 : D4AE21           | 0.45  | yes  | down    | 1.5E-04 | yes  | chr4     | exon         | first exon      | NA   | 0.71 | no   | down | 0.05 | yes  | 0.85 | no  | down    | 5.3E-06 | yes |
| ENSRNOT00000023290 : LOC108348175 : A0A0G20.05 | yes   | down | 4.0E-19 | yes     | chr1 | promoter | Intermediate | LCP             | 1.00 | no   | down | 0.97 | no   | 1.01 | no   | up  | 4.0E-01 | no      |     |
| ENSRNOT00000067796 : Sme5 : D4A9F0             | 4.35  | yes  | up      | 2.4E-09 | yes  | chr1     | promoter     | Distal          | LCP  | 1.01 | no   | up   | 0.09 | no   | 0.86 | no  | down    | 3.1E-03 | yes |
| MSTRG.14252.1 : Akap9 : F1LPB4                 | 2.74  | yes  | up      | 2.9E-04 | yes  | chr4     | intron       | internal intron | NA   | 1.00 | no   | down | 0.99 | no   | 1.05 | no  | up      | 2.3E-05 | yes |
| MSTRG.19819.2 : Neo1 : P97603                  | 0     | yes  | down    | 3.5E-04 | yes  | chr8     | promoter     | Intermediate    | LCP  | 1.54 | no   | up   | 0.34 | no   | 0.98 | no  | down    | 1.8E-02 | yes |
| MSTRG.10569.3 : Plpp1 : O08564                 | 0.47  | yes  | down    | 8.3E-05 | yes  | chr2     | intron       | internal intron | NA   | 1.21 | no   | up   | 0.54 | no   | 1.04 | no  | up      | 2.9E-03 | yes |
| MSTRG.18043.2 : Stat2 : Q5XI26                 | 0.06  | yes  | down    | 1.0E-04 | yes  | chr7     | promoter     | Distal          | LCP  | 0.69 | no   | down | 0.15 | no   | 1.14 | no  | up      | 1.9E-09 | yes |
| MSTRG.16517.1 : Slc9a1 : Q8R4H8                | 0.61  | yes  | down    | 7.2E-05 | yes  | chr5     | intron       | internal intron | NA   | 0.70 | no   | down | 0.48 | no   | 1.05 | no  | up      | 2.8E-01 | no  |
| MSTRG.21176.1 : Inpp5d : F1M981                | 0.08  | yes  | down    | 9.9E-05 | yes  | chr9     | intron       | internal intron | NA   | 0.38 | yes  | down | 0.04 | yes  | 1.08 | no  | up      | 3.1E-05 | yes |
| MSTRG.8033.1 : Slc27a1 : Q6GMM8                | 0.26  | yes  | down    | 5.6E-15 | yes  | chr16    | intron       | internal intron | NA   | 1.05 | no   | up   | 0.91 | no   | 0.99 | no  | down    | 2.5E-01 | no  |
| ENSRNOT00000087961 : Nap114 : Q5U2Z3           | 0.36  | yes  | down    | 7.2E-05 | yes  | chr1     | intron       | internal intron | NA   | 0.62 | no   | down | 0.62 | no   | 0.98 | no  | down    | 3.1E-02 | yes |
| ENSRNOT000000077015 : Prdm16 : M0RDL0          | 0.37  | yes  | down    | 2.7E-04 | yes  | chr5     | exon         | internal exon   | NA   | 0.76 | no   | down | 0.02 | yes  | 0.83 | yes | down    | 1.1E-06 | yes |
| MSTRG.21122.3 : Agfg1 : F1M9N7                 | 3.59  | yes  | up      | 1.8E-08 | yes  | chr9     | exon         | internal exon   | NA   | 0.87 | no   | down | 0.46 | no   | 1.16 | no  | up      | 6.0E-06 | yes |
| MSTRG.18208.1 : Atp5d : G3V7Y3                 | 0.12  | yes  | down    | 5.2E-08 | yes  | chr7     | promoter     | Distal          | LCP  | 0.25 | yes  | down | 0.40 | no   | 0.90 | no  | down    | 7.4E-12 | yes |
| ENSRNOT00000010349 : Kmt2c : A0A0G2K426        | 0.22  | yes  | down    | 1.1E-11 | yes  | chr4     | promoter     | Distal          | LCP  | 1.22 | no   | up   | 0.42 | no   | 0.69 | yes | down    | 1.4E-11 | yes |
| MSTRG.18072.2 : Dgka : P51556                  | 0.72  | yes  | down    | 1.5E-04 | yes  | chr7     | exon         | internal exon   | NA   | 1.45 | no   | up   | 0.21 | no   | 0.95 | no  | down    | 8.8E-04 | yes |
| MSTRG.11222.1 : Fdps : F1LND7                  | inf   | yes  | up      | 2.2E-05 | yes  | chr2     | exon         | last exon       | NA   | 1.01 | no   | up   | 0.98 | no   | 1.07 | no  | up      | 1.2E-03 | yes |
| MSTRG.11265.13 : Ubap21 : E9PTR4               | 6.62  | yes  | up      | 4.0E-04 | yes  | chr2     | intron       | internal intron | NA   | 1.21 | no   | up   | 0.38 | no   | 1.13 | no  | up      | 3.8E-12 | yes |
| MSTRG.2881.9 : Pkd1 : Q9ERV0                   | inf   | yes  | up      | 6.6E-05 | yes  | chr10    | intron       | internal intron | NA   | 0.97 | no   | down | 0.93 | no   | 1.19 | no  | up      | 9.8E-07 | yes |
| MSTRG.8278.27 : Rbpms : F2Z3S5                 | 0.02  | yes  | down    | 2.6E-05 | yes  | chr16    | promoter     | Proximal        | ICP  | 1.07 | no   | up   | 0.50 | no   | 1.06 | no  | up      | 4.9E-05 | yes |
| MSTRG.15231.3 : Tspan9 : D4AAV9                | 0.41  | yes  | down    | 1.4E-09 | yes  | chr4     | exon         | last exon       | NA   | 1.70 | no   | up   | 0.42 | no   | 0.96 | no  | down    | 2.4E-05 | yes |
| MSTRG.332.3 : Fgfr1op : Q4V7C1                 | 7.97  | yes  | up      | 2.8E-17 | yes  | chr1     | intron       | internal intron | NA   | 0.64 | no   | down | 0.46 | no   | 1.07 | no  | up      | 7.3E-04 | yes |
| MSTRG.16327.11 : Macf1 : A0A0G2K9T4            | 0.36  | yes  | down    | 1.3E-05 | yes  | chr5     | exon         | last exon       | NA   | 0.35 | yes  | down | 0.40 | no   | 0.97 | no  | down    | 9.0E-11 | yes |
| MSTRG.10569.2 : Plpp1 : O08564                 | 0.47  | yes  | down    | 8.3E-05 | yes  | chr2     | intron       | internal intron | NA   | 0.67 | no   | down | 0.11 | no   | 1.04 | no  | up      | 2.9E-03 | yes |
| MSTRG.6818.3 : Rbpj : M0R7Q3                   | 0.34  | yes  | down    | 7.0E-05 | yes  | chr14    | intron       | last intron     | NA   | 0.77 | no   | down | 0.69 | no   | 1.08 | no  | up      | 1.1E-04 | yes |
| MSTRG.8325.2 : Hook3 : Q7TQ77                  | 0.22  | yes  | down    | 2.1E-04 | yes  | chr16    | intron       | internal intron | NA   | 2.60 | yes  | up   | 0.36 | no   | 1.01 | no  | up      | 5.0E-03 | yes |
| MSTRG.14930.2 : Grip2 : A0A0H2UHH8             | 2.18  | yes  | up      | 2.2E-05 | yes  | chr4     | intron       | internal intron | NA   | 0.87 | no   | down | 0.42 | no   | 1.01 | no  | up      | 5.2E-01 | no  |
| MSTRG.12280.3 : Herc4 : Q5PQN1                 | 2.70  | yes  | up      | 6.2E-07 | yes  | chr20    | intron       | internal intron | NA   | 0.77 | no   | down | 0.50 | no   | 1.00 | no  | down    | 9.1E-01 | no  |
| MSTRG.19963.5 : Sltm : A0A0G2K904              | 0.34  | yes  | down    | 6.4E-06 | yes  | chr8     | intron       | internal intron | NA   | 0.85 | no   | down | 0.73 | no   | 0.94 | no  | down    | 2.8E-02 | yes |
| ENSRNOT00000076511 : Synm : G3V9G5             | 1.68  | yes  | up      | 3.0E-04 | yes  | chr1     | exon         | last exon       | NA   | 0.43 | yes  | down | 0.01 | yes  | 0.82 | yes | down    | 8.8E-13 | yes |
| ENSRNOT00000011969 : Slc35a1 : D3ZJ48          | 0.47  | yes  | down    | 4.9E-04 | yes  | chr5     | exon         | internal exon   | NA   | 1.75 | no   | up   | 0.03 | yes  | 1.00 | no  | up      | 9.2E-01 | no  |
| MSTRG.11405.3 : Pde4dip : A0A0G2JW66           | 6.94  | yes  | up      | 5.0E-08 | yes  | chr2     | exon         | internal exon   | NA   | 1.04 | no   | up   | 0.47 | no   | 1.06 | no  | up      | 5.1E-04 | yes |
| ENSRNOT00000041571 : Cacna1c : F1MA84          | 4.75  | yes  | up      | 4.3E-04 | yes  | chr4     | intron       | internal intron | NA   | 0.89 | no   | down | 0.62 | no   | 0.97 | no  | down    | 2.7E-02 | yes |
| ENSRNOT00000091287 : Srrm2 : A0A0G2K2M9        | 1.72  | yes  | up      | 9.0E-05 | yes  | chr10    | exon         | internal exon   | NA   | 1.10 | no   | up   | 0.86 | no   | 1.00 | no  | up      | 9.0E-01 | no  |
| MSTRG.16771.3 : H6pd : D4A7D7                  | 0.22  | yes  | down    | 2.6E-06 | yes  | chr5     | intron       | last intron     | NA   | 0.58 | no   | down | 0.50 | no   | 1.14 | no  | up      | 9.6E-15 | yes |
| ENSRNOT00000028445 : Slc4a1 : Q5U329           | 0.42  | yes  | down    | 3.2E-08 | yes  | chr10    | intron       | internal intron | NA   | 1.00 | no   | down | 0.48 | no   | 0.87 | no  | down    | 1.3E-09 | yes |
| MSTRG.11263.2 : Atp8b2 : D4A509                | 0.14  | yes  | down    | 3.1E-04 | yes  | chr2     | exon         | first exon      | NA   | 0.68 | no   | down | 0.47 | no   | 0.92 | no  | down    | 5.0E-03 | yes |
| MSTRG.10603.2 : Nnt : Q5BJZ3                   | 3.00  | yes  | up      | 1.8E-04 | yes  | chr2     | intron       | internal intron | NA   | 1.18 | no   | up   | 0.67 | no   | 0.96 | no  | down    | 1.2E-07 | yes |
| MSTRG.5399.3 : Eln : A0A0G2JST5                | 3.55  | yes  | up      | 3.0E-04 | yes  | chr12    | intron       | internal intron | NA   | 0.82 | no   | down | 0.64 | no   | 0.91 | no  | down    | 1.2E-01 | no  |
| ENSRNOT00000091569 : Zfp592 : D3ZJG8           | 0.22  | yes  | down    | 8.1E-08 | yes  | chr1     | exon         | internal exon   | NA   | 0.96 | no   | down | 0.46 | no   | 1.06 | no  | up      | 1.8E-05 | yes |
| MSTRG.20044.2 : Phip : F1M3B3                  | 4.05  | yes  | up      | 4.4E-04 | yes  | chr8     | intron       | internal intron | NA   | 1.22 | no   | up   | 0.86 | no   | 0.95 | no  | down    | 6.3E-02 | no  |
| MSTRG.12137.3 : Pknox1 : Q5BJP1                | 0.26  | yes  | down    | 3.4E-07 | yes  | chr20    | promoter     | Proximal        | LCP  | 1.22 | no   | up   | 0.60 | no   | 0.89 | no  | down    | 7.5E-04 | yes |
| MSTRG.20878.6 : Glis : P13264                  | 0.05  | yes  | down    | 1.5E-13 | yes  | chr9     | intron       | first intron    | NA   | 1.14 | no   | up   | 0.89 | no   | 1.08 | no  | up      | 4.1E-02 | yes |
| ENSRNOT00000007583 : Srsf5 : Q09167            | 0.10  | yes  | down    | 3.0E-09 | yes  | chr6     | promoter     | Proximal        | ICP  | 1.12 | no   | up   | 0.72 | no   | 1.03 | no  | up      | 4.2E-02 | yes |
| ENSRNOT00000041168 : Gp1bb : Q9JJM7            | 0     | yes  | down    | 2.2E-04 | yes  | chr11    | intron       | internal intron | NA   | 0.62 | no   | down | 0.42 | no   | 0.93 | no  | down    | 7.7E-08 | yes |
| ENSRNOT00000014207 : Cand2 : G3V7E8            | 0.39  | yes  | down    | 2.9E-04 | yes  | chr4     | exon         | internal exon   | NA   | 1.01 | no   | up   | 0.23 | no   | 0.97 | no  | down    | 1.3E-05 | yes |
| ENSRNOT00000061332 : Eph4i2 : D3ZM69           | 0.25  | yes  | down    | 1.1E-12 | yes  | chr1     | intron       | internal intron | NA   | 0.99 | no   | down | 0.14 | no   | 0.91 | no  | down    | 8.9E-11 | yes |
| ENSRNOT00000016449 : Ktn1 : D4A4Z9             | 2.49  | yes  | up      | 1.2E-04 | yes  | chr15    | intron       | internal intron | NA   | 1.22 | no   | up   | 0.22 | no   | 1.04 | no  | up      | 2.2E-11 | yes |
| ENSRNOT00000085022 : Ube4a : F1M9N5            | 4.51  | yes  | up      | 1.3E-04 | yes  | chr8     | intron       | internal intron | NA   | 1.37 | no   | up   | 0.24 | no   | 0.97 | no  | down    | 2.4E-03 | yes |
| MSTRG.7470.8 : Acin1 : E9PST5                  | 0.30  | yes  | down    | 1.1E-04 | yes  | chr15    | promoter     | Distal          | LCP  | 1.00 | no   | down | 0.99 | no   | 0.98 | no  | down    | 5.1E-04 | yes |
| MSTRG.11265.12 : Ubap21 : E9PTR4               | 6.62  | yes  | up      | 4.0E-04 | yes  | chr2     | intron       | internal intron | NA   | 0.88 | no   | down | 0.52 | no   |      |     |         |         |     |

|                                           |       |     |      |         |     |       |          |                 |     |      |     |      |      |     |      |     |      |         |     |
|-------------------------------------------|-------|-----|------|---------|-----|-------|----------|-----------------|-----|------|-----|------|------|-----|------|-----|------|---------|-----|
| MSTRG.7804.1 : Mycbp2 : A0A1W2Q6I3        | 0.31  | yes | down | 9.2E-06 | yes | chr15 | intron   | internal intron | NA  | 1.03 | no  | up   | 0.49 | no  | 1.00 | no  | up   | 8.8E-01 | no  |
| MSTRG.13558.3 : Siglec1 : A0A0G2K320      | 0.24  | yes | down | 6.2E-06 | yes | chr3  | promoter | Proximal        | LCP | 1.35 | no  | up   | 0.09 | no  | 1.25 | yes | up   | 7.1E-13 | yes |
| ENSRNOT00000027220 : Scly : Q68FT9        | 0.19  | yes | down | 5.0E-08 | yes | chr9  | intron   | internal intron | NA  | 0.96 | no  | down | 0.80 | no  | 0.92 | no  | down | 4.2E-10 | yes |
| ENSRNOT00000087739 : Kif1b : A0A0G2KA12   | 3.65  | yes | up   | 7.4E-05 | yes | chr5  | intron   | internal intron | NA  | 1.00 | no  | down | 0.47 | no  | 1.05 | no  | up   | 6.5E-02 | no  |
| MSTRG.1546.2 : Ampd3 : O09178             | 0.39  | yes | down | 3.1E-04 | yes | chr1  | intron   | internal intron | NA  | 0.91 | no  | down | 0.85 | no  | 0.94 | no  | down | 8.5E-03 | yes |
| MSTRG.15356.4 : Pde3a : Q62865            | 0.30  | yes | down | 3.1E-07 | yes | chr4  | intron   | internal intron | NA  | 0.85 | no  | down | 0.76 | no  | 1.00 | no  | up   | 9.7E-01 | no  |
| MSTRG.5804.9 : Clasp1 : F1LNR1            | 0.36  | yes | down | 6.7E-07 | yes | chr13 | intron   | internal intron | NA  | 0.47 | yes | down | 0.05 | yes | 1.00 | no  | down | 7.0E-01 | no  |
| MSTRG.21401.3 : Usp9x : D3ZC84            | 21.85 | yes | up   | 4.1E-05 | yes | chrX  | exon     | last exon       | NA  | 1.30 | no  | up   | 0.28 | no  | 1.00 | no  | up   | 7.5E-01 | no  |
| MSTRG.3895.6 : Cdk12 : A0A0G2K5U7         | 5.94  | yes | up   | 1.1E-04 | yes | chr10 | exon     | first exon      | NA  | 1.24 | no  | up   | 0.49 | no  | 0.97 | no  | down | 5.5E-04 | yes |
| MSTRG.20764.3 : Ugg1 : Q9JLA3             | 0.22  | yes | down | 3.9E-04 | yes | chr9  | intron   | internal intron | NA  | 0.91 | no  | down | 0.79 | no  | 1.11 | no  | up   | 9.8E-15 | yes |
| ENSRNOT00000083779 : Asph : A0A096MKE0    | 2.56  | yes | up   | 9.8E-06 | yes | chr5  | intron   | internal intron | NA  | 1.00 | no  | down | 0.76 | no  | 0.99 | no  | down | 1.3E-01 | no  |
| ENSRNOT00000012190 : Cntn2 : G3V758       | 2.37  | yes | up   | 8.3E-06 | yes | chr13 | exon     | internal exon   | NA  | 1.02 | no  | up   | 0.96 | no  | 1.00 | no  | down | 9.1E-01 | no  |
| MSTRG.12279.1 : Ctnna3 : F1M4I1           | 0     | yes | down | 1.3E-06 | yes | chr20 | promoter | Distal          | LCP | 0.68 | no  | down | 0.54 | no  | 0.92 | no  | down | 3.6E-04 | yes |
| ENSRNOT00000020752 : Pign : E9PTA5        | 0.23  | yes | down | 2.2E-04 | yes | chr13 | intron   | internal intron | NA  | 1.81 | no  | up   | 0.19 | no  | 1.05 | no  | up   | 3.6E-03 | yes |
| ENSRNOT00000078980 : More2 : D4A2C4       | 6.36  | yes | up   | 1.5E-04 | yes | chr14 | promoter | Proximal        | HCP | 1.20 | no  | up   | 0.40 | no  | 0.97 | no  | down | 3.2E-01 | no  |
| MSTRG.11964.2 : Ddx39b : Q634I3           | 0.02  | yes | down | 4.7E-11 | yes | chr20 | exon     | last exon       | NA  | 0.69 | no  | down | 0.68 | no  | 1.01 | no  | up   | 2.0E-01 | no  |
| MSTRG.7830.3 : Dock9 : F1LSM8             | 0.10  | yes | down | 2.7E-05 | yes | chr15 | intron   | internal intron | NA  | 1.51 | no  | up   | 0.38 | no  | 0.97 | no  | down | 2.3E-04 | yes |
| MSTRG.16557.9 : Srrm1 : B2RYB3            | 2.05  | yes | up   | 2.0E-04 | yes | chr5  | intron   | internal intron | NA  | 1.64 | no  | up   | 0.17 | no  | 1.10 | no  | up   | 2.8E-06 | yes |
| MSTRG.17588.1 : Ylpm1 : A0A0G2K678        | 0.14  | yes | down | 2.3E-07 | yes | chr6  | intron   | internal intron | NA  | 0.75 | no  | down | 0.15 | no  | 1.02 | no  | up   | 1.8E-03 | yes |
| MSTRG.11888.1 : Ppp1r18 : A0A0G2K8B3      | 0.32  | yes | down | 2.0E-04 | yes | chr20 | promoter | Distal          | LCP | 1.88 | no  | up   | 0.53 | no  | 1.10 | no  | up   | 1.1E-05 | yes |
| ENSRNOT00000045315 : Col18a1 : F1LR02     | 0.22  | yes | down | 4.1E-11 | yes | chr20 | exon     | internal exon   | NA  | 0.86 | no  | down | 0.58 | no  | 1.03 | no  | up   | 3.6E-07 | yes |
| MSTRG.18210.2 : Stk11 : A0A0H2UI02        | 0.18  | yes | down | 9.1E-05 | yes | chr7  | exon     | last exon       | NA  | 1.03 | no  | up   | 0.74 | no  | 0.88 | no  | down | 1.8E-03 | yes |
| MSTRG.19088.5 : Scube1 : F1M987           | 2.13  | yes | up   | 1.3E-04 | yes | chr7  | intron   | internal intron | NA  | 1.62 | no  | up   | 0.13 | no  | 0.80 | yes | down | 1.2E-14 | yes |
| MSTRG.20764.4 : Ugg1 : Q9JLA3             | 0.22  | yes | down | 3.9E-04 | yes | chr9  | intron   | internal intron | NA  | 0.56 | no  | down | 0.44 | no  | 1.11 | no  | up   | 9.8E-15 | yes |
| MSTRG.6480.8 : Evi5 : D3ZJN9              | 4.04  | yes | up   | 4.0E-04 | yes | chr14 | intron   | internal intron | NA  | 0.98 | no  | down | 0.98 | no  | 0.98 | no  | down | 2.5E-01 | no  |
| ENSRNOT00000014023 : Fam126a : A0A0G2K3C7 | 0.38  | yes | down | 2.9E-04 | yes | chr4  | promoter | Intermediate    | LCP | 1.31 | no  | up   | 0.19 | no  | 1.07 | no  | up   | 1.8E-06 | yes |
| MSTRG.20352.3 : Ubp1 : D4A030             | 0.44  | yes | down | 2.3E-04 | yes | chr8  | intron   | internal intron | NA  | 0.98 | no  | down | 0.98 | no  | 0.98 | no  | down | 1.9E-01 | no  |
| ENSRNOT00000006116 : Sec14I4 : A0A0G2JW18 | 0.38  | yes | down | 1.3E-04 | yes | chr14 | intron   | internal intron | NA  | 0.65 | no  | down | 0.30 | no  | 0.91 | no  | down | 1.1E-08 | yes |
| MSTRG.19710.3 : Alg9 : D3ZCW5             | 0.10  | yes | down | 9.3E-08 | yes | chr8  | intron   | first intron    | NA  | 1.39 | no  | up   | 0.09 | no  | 1.11 | no  | up   | 6.0E-03 | yes |
| MSTRG.8948.3 : Mtpap : D3ZPN5             | 1.99  | yes | up   | 1.4E-05 | yes | chr17 | intron   | internal intron | NA  | 0.68 | no  | down | 0.04 | yes | 1.03 | no  | up   | 1.2E-01 | no  |
| MSTRG.6713.5 : Fryl : D3ZQY4              | 2.76  | yes | up   | 1.7E-04 | yes | chr14 | intron   | internal intron | NA  | 0.67 | no  | down | 0.36 | no  | 1.00 | no  | down | 4.6E-01 | no  |
| MSTRG.22064.11 : Arhgap4 : A0A0G2JVF0     | 0.34  | yes | down | 1.4E-05 | yes | chrX  | intron   | internal intron | NA  | 1.65 | no  | up   | 0.16 | no  | 1.07 | no  | up   | 7.1E-04 | yes |
| MSTRG.18043.7 : Stat2 : Q5XI26            | 0.06  | yes | down | 1.0E-04 | yes | chr7  | promoter | Distal          | LCP | 0.93 | no  | down | 0.72 | no  | 1.14 | no  | up   | 1.9E-09 | yes |
| ENSRNOT00000010891 : Ptgis : Q62969       | 0.55  | yes | down | 6.0E-05 | yes | chr3  | intron   | internal intron | NA  | 0.65 | no  | down | 0.03 | yes | 0.99 | no  | down | 7.4E-02 | no  |
| MSTRG.7061.1 : Tbrg4 : Q5M9G9             | 0.25  | yes | down | 2.7E-04 | yes | chr14 | promoter | Distal          | LCP | 0.96 | no  | down | 0.89 | no  | 0.99 | no  | down | 1.9E-01 | no  |
| MSTRG.16517.2 : Slc9a1 : Q8R4H8           | 0.61  | yes | down | 7.2E-05 | yes | chr5  | intron   | internal intron | NA  | 1.34 | no  | up   | 0.44 | no  | 1.05 | no  | up   | 2.8E-01 | no  |
| MSTRG.7822.1 : Rap2a : A0A0G2JTW1         | 4.31  | yes | up   | 1.6E-04 | yes | chr15 | intron   | last intron     | NA  | 1.12 | no  | up   | 0.14 | no  | 0.76 | yes | down | 2.5E-10 | yes |
| ENSRNOT00000078589 : Bclaf1 : B1WC16      | 0.67  | yes | down | 1.3E-07 | yes | chr1  | intron   | internal intron | NA  | 1.39 | no  | up   | 0.68 | no  | 1.03 | no  | up   | 6.8E-02 | no  |
| ENSRNOT00000086853 : Triobp : A2TIS7      | 0.29  | yes | down | 2.0E-06 | yes | chr7  | intron   | internal intron | NA  | 0.63 | no  | down | 0.32 | no  | 0.97 | no  | down | 5.1E-06 | yes |
| MSTRG.5280.4 : Taf6 : Q498R0              | 0.74  | yes | down | 2.2E-06 | yes | chr12 | intron   | internal intron | NA  | 0.87 | no  | down | 0.39 | no  | 0.91 | no  | down | 1.8E-03 | yes |
| ENSRNOT00000068013 : Polr2a : D4A5A6      | 2.68  | yes | up   | 1.4E-05 | yes | chr10 | exon     | internal exon   | NA  | 1.22 | no  | up   | 0.33 | no  | 1.00 | no  | down | 6.0E-01 | no  |
| MSTRG.5082.2 : HspH1 : Q66HA8             | inf   | yes | up   | 3.0E-05 | yes | chr12 | intron   | internal intron | NA  | 0.71 | no  | down | 0.52 | no  | 1.12 | no  | up   | 9.8E-13 | yes |
| ENSRNOT00000080253 : Spg11 : D3Z9Z3       | 3.32  | yes | up   | 5.0E-08 | yes | chr3  | exon     | internal exon   | NA  | 1.13 | no  | up   | 0.02 | yes | 0.97 | no  | down | 1.4E-02 | yes |
| MSTRG.3572.8 : RGD1307929 : F1LSX1        | 7.34  | yes | up   | 1.1E-12 | yes | chr10 | intron   | internal intron | NA  | 1.64 | no  | up   | 0.59 | no  | 0.97 | no  | down | 1.8E-04 | yes |
| ENSRNOT000000031770 : Arhgap17 : D4AAV2   | 0.83  | yes | down | 2.6E-07 | yes | chr1  | intron   | internal intron | NA  | 0.91 | no  | down | 0.82 | no  | 1.01 | no  | up   | 3.1E-01 | no  |
| ENSRNOT00000038246 : Thada : D3ZVT2       | inf   | yes | up   | 4.7E-04 | yes | chr6  | intron   | internal intron | NA  | 1.02 | no  | up   | 0.94 | no  | 0.88 | no  | down | 1.3E-03 | yes |
| MSTRG.20998.1 : Pikfyve : D3ZYT8          | 0.33  | yes | down | 2.0E-04 | yes | chr9  | intron   | internal intron | NA  | 0.49 | yes | down | 0.14 | no  | 1.22 | yes | up   | 6.5E-08 | yes |
| ENSRNOT00000057950 : Ctnna3 : F1M4I1      | 0     | yes | down | 1.3E-06 | yes | chr20 | promoter | Distal          | LCP | 1.14 | no  | up   | 0.59 | no  | 0.92 | no  | down | 3.6E-04 | yes |
| MSTRG.19895.1 : Hacd3 : D4ABI7            | 0.11  | yes | down | 1.7E-06 | yes | chr8  | intron   | internal intron | NA  | 1.36 | no  | up   | 0.46 | no  | 1.02 | no  | up   | 6.2E-05 | yes |
| ENSRNOT00000038652 : Atp8b1 : D4AA47      | 0.41  | yes | down | 3.3E-04 | yes | chr18 | promoter | Distal          | LCP | 0.99 | no  | down | 0.93 | no  | 1.06 | no  | up   | 7.8E-04 | yes |
| MSTRG.2839.11 : Srrm2 : A0A0G2K2M9        | 1.72  | yes | up   | 9.0E-05 | yes | chr10 | exon     | internal exon   | NA  | 0.69 | no  | down | 0.81 | no  | 1.00 | no  | up   | 9.0E-01 | no  |
| MSTRG.4716.3 : Adecy5 : G3V9G1            | 0.16  | yes | down | 2.3E-10 | yes | chr11 | intron   | internal intron | NA  | 0.68 | no  | down | 0.43 | no  | 1.00 | no  | down | 7.6E-01 | no  |
| MSTRG.11268.3 : Tpm3 : A0A140TAF0         | 0.37  | yes | down | 8.0E-05 | yes | chr2  | intron   | internal intron | NA  | 0.97 | no  | down | 0.91 | no  | 1.03 | no  | up   | 4.4E-04 | yes |
| MSTRG.12668.1 : Nup188 : F1LRC6           | 0.22  | yes | down | 2.3E-05 | yes | chr3  | exon     | internal exon   | NA  | 2.25 | yes | up   | 0.09 | no  | 1.02 | no  | up   | 1.9E-01 | no  |
| ENSRNOT00000021171 : Sfxn3 : Q9JHY2       | 0.39  | yes | down | 7.8E-05 | yes | chr1  | intron   | internal intron | NA  | 0.92 | no  | down | 0.57 | no  | 0.98 | no  | down | 7.5E-03 | yes |
| ENSRNOT00000025536 : Ntrk3 : Q68G04       | 7.03  | yes | up   | 1.5E-06 | yes | chr1  | intron   | internal intron | NA  | 0.90 | no  | down | 0.20 | no  | 0.87 | no  | down | 1.8E-07 | yes |
| ENSRNOT00000033975 : Tnrc6b : A0A0G2K6R0  | 2.14  | yes | up   | 4.3E-13 | yes | chr7  | exon     | last exon       | NA  | 0.69 | no  | down | 0.52 | no  | 1.01 | no  | up   | 7.4E-01 | no  |
| ENSRNOT00000080382 : Zeb2 : A0A0G2K8T6    | 0.34  | yes | down | 8.0E-09 | yes | chr3  | intron   | internal intron | NA  | 0.87 | no  | down | 0.47 | no  | 1.01 | no  | up   | 2.4E-01 | no  |
| MSTRG.877.3 : Lsm14a : A0A0G2JUK2         | 0.31  | yes | down | 3.8E-04 | yes | chr1  | intron   | last intron     | NA  | 1.25 | no  | up   | 0.55 | no  | 1.02 | no  | up   | 2.8E-01 | no  |
| ENSRNOT00000006168 : Nfic : O70188        | 1.68  | yes | up   | 1.4E-06 | yes | chr7  | intron   | internal intron | NA  | 0.94 | no  | down | 0.59 | no  | 0.85 | no  | down | 3.8E-12 | yes |
| MSTRG.15840.1 : Tmem245 : D3ZXD8          | 5.92  | yes | up   | 3.2E-05 | yes | chr5  | intron   | internal intron | NA  | 2.00 | yes | up   | 0.38 | no  | 0.88 | no  | down | 4.0E-07 | yes |
| MSTRG.8511.2 : Dapk1 : F1LNN8             | 0.35  | yes | down | 1.5E-04 | yes | chr17 | intron   | internal intron | NA  | 1.44 | no  | up   | 0.09 | no  | 0.96 | no  | down | 1.0E-01 | no  |
| ENSRNOT00000087241 : Podxl : A0A0G2K2L1   | 0.31  | yes | down | 1.5E-14 | yes | chr4  | intron   | internal intron | NA  | 1.36 | no  | up   | 0.09 | no  | 0.91 | no  | down | 6.5E-07 | yes |
| ENSRNOT000000008211 : Cpq : Q6IRK9        | 0.21  | yes | down | 1.1E-08 | yes | chr7  | intron   | internal intron | NA  | 1.44 | no  | up   | 0.05 | yes | 1.02 | no  | up   | 4.8E-04 | yes |
| MSTRG.2630.1 : Pdc11 : D3ZNI3             | 0.34  | yes | down | 5.3E-07 | yes | chr1  | exon     | internal exon   | NA  | 1.19 | no  | up   | 0.29 | no  | 1.08 | no  | up   | 5.5E-06 | yes |
| ENSRNOT00000092987 : Stim1 : P84903       | 2.61  | yes | up   | 1.3E-04 | yes | chr1  | exon     | last exon       | NA  | 0.99 | no  | down | 0.13 | no  | 0.92 | no  | down | 3.4E-08 | yes |
| MSTRG.3645.6 : Slfn13 : A0A096MKD0        | 2.27  | yes | up   | 1.5E-04 | yes | chr10 | promoter | Intermediate    | LCP | 1.20 | no  | up   | 0.84 | no  | 0.97 | no  | down | 2.7E-02 | yes |
| MSTRG.4978.1 : Pi4ka : A0A140TAJ5         | 7.84  | yes | up   | 1.4E-07 | yes | chr11 | intron   | internal intron | NA  | 0.45 | yes | down | 0.01 | yes | 0.97 | no  | down | 1.2E-03 | yes |
| MSTRG.19125.3 : Brd1 : D3ZUW8             | 7.17  | yes | up   | 3.3E-04 | yes | chr7  | exon     | internal exon   | NA  | 1.44 | no  | up   | 0.75 | no  | 1.21 | yes | up   | 6.4E-02 | no  |
| MSTRG.11962.2 : Ddx39b : Q634I3           | 0.02  | yes | down | 4.7E-11 | yes | chr20 | exon     | last exon       | NA  | 1.34 | no  | up   | 0.57 | no  | 1.01 | no  | up   | 2.0E-01 | no  |
| MSTRG.13128.1 : Itgav : F1LZX9            | 24.74 | yes | up   | 1.9E-17 | yes | chr3  | intron   | first intron    | NA  | 1.72 | no  | up   | 0.21 | no  | 0.92 | no  | down |         |     |

|                                          |       |     |      |         |     |       |          |                 |     |      |     |      |      |     |      |     |      |         |     |
|------------------------------------------|-------|-----|------|---------|-----|-------|----------|-----------------|-----|------|-----|------|------|-----|------|-----|------|---------|-----|
| MSTRG.21039.12 : Tns1 : F1LN42           | 0.09  | yes | down | 2.0E-04 | yes | chr9  | intron   | last intron     | NA  | 0.58 | no  | down | 0.40 | no  | 0.86 | no  | down | 7.8E-19 | yes |
| MSTRG.12137.2 : Pknox1 : Q5BJP1          | 0.26  | yes | down | 3.4E-07 | yes | chr20 | promoter | Proximal        | LCP | 1.25 | no  | up   | 0.72 | no  | 0.89 | no  | down | 7.5E-04 | yes |
| MSTRG.21083.7 : Speg : Q63638            | 0.17  | yes | down | 2.6E-06 | yes | chr9  | intron   | internal intron | NA  | 0.70 | no  | down | 0.58 | no  | 0.88 | no  | down | 2.3E-07 | yes |
| MSTRG.11265.16 : Ubp2l : E9PTR4          | 6.62  | yes | up   | 4.0E-04 | yes | chr2  | intron   | internal intron | NA  | 2.25 | yes | up   | 0.02 | yes | 1.13 | no  | up   | 3.8E-12 | yes |
| MSTRG.9268.4 : Lims2 : A0A0G2KAE1        | 0.67  | yes | down | 6.6E-13 | yes | chr18 | intron   | internal intron | NA  | 0.60 | no  | down | 0.08 | no  | 0.82 | yes | down | 4.4E-10 | yes |
| ENSRNOT00000078073 : GlS : A0A0G2KAN7    | 0.05  | yes | down | 1.5E-13 | yes | chr9  | intron   | first intron    | NA  | 0.34 | yes | down | 0.01 | yes | 1.09 | no  | up   | 8.3E-03 | yes |
| MSTRG.16461.10 : Pum1 : D3Z8L5           | 0.44  | yes | down | 3.1E-04 | yes | chr5  | intron   | internal intron | NA  | 0.55 | no  | down | 0.04 | yes | 1.03 | no  | up   | 7.0E-02 | no  |
| MSTRG.21039.13 : Tns1 : F1LN42           | 0.09  | yes | down | 2.0E-04 | yes | chr9  | intron   | last intron     | NA  | 1.11 | no  | up   | 0.86 | no  | 0.86 | no  | down | 7.8E-19 | yes |
| MSTRG.9111.1 : Bmi1 : B4F7B6             | 2.46  | yes | up   | 2.3E-04 | yes | chr17 | exon     | last exon       | NA  | 4.45 | yes | up   | 0.33 | no  | 0.98 | no  | down | 3.6E-01 | no  |
| ENSRNOT0000003077 : Pdgfra : G3V6A0      | 0.22  | yes | down | 1.6E-04 | yes | chr14 | intron   | last intron     | NA  | 1.19 | no  | up   | 0.38 | no  | 1.02 | no  | up   | 4.1E-02 | yes |
| ENSRNOT00000092769 : Sema4a : A0A1B0GWV9 | 3.09  | yes | up   | 1.9E-04 | yes | chr2  | promoter | Intermediate    | LCP | 1.11 | no  | up   | 0.34 | no  | 1.07 | no  | up   | 2.4E-05 | yes |
| ENSRNOT00000028856 : Hspa12b : D3ZVM5    | 0.65  | yes | down | 3.5E-04 | yes | chr3  | intron   | last intron     | NA  | 0.86 | no  | down | 0.67 | no  | 0.86 | no  | down | 5.9E-13 | yes |
| ENSRNOT00000092395 : Mapk10 : A0A0U1RRS7 | 2.61  | yes | up   | 3.6E-06 | yes | chr14 | intron   | first intron    | NA  | 0.99 | no  | down | 0.45 | no  | 0.56 | yes | down | 6.7E-04 | yes |
| MSTRG.11369.2 : Vps45 : O08700           | 3.11  | yes | up   | 8.5E-06 | yes | chr2  | intron   | internal intron | NA  | 1.09 | no  | up   | 0.72 | no  | 0.99 | no  | down | 3.7E-01 | no  |
| MSTRG.6560.1 : Hnrnpdl : A0A0G2KAZ7      | inf   | yes | up   | 7.6E-05 | yes | chr14 | intron   | first intron    | NA  | 0.92 | no  | down | 0.64 | no  | 0.99 | no  | down | 4.6E-01 | no  |
| ENSRNOT00000045400 : Macf1 : A0A0G2K9T4  | 0.36  | yes | down | 1.3E-05 | yes | chr5  | exon     | last exon       | NA  | 1.17 | no  | up   | 0.41 | no  | 0.97 | no  | down | 9.0E-11 | yes |
| ENSRNOT00000025281 : Tomm40 : G3V8F5     | 0.23  | yes | down | 3.2E-04 | yes | chr1  | promoter | Distal          | LCP | 1.34 | no  | up   | 0.77 | no  | 1.06 | no  | up   | 1.1E-05 | yes |
| ENSRNOT00000079069 : Bclaf1 : B1WC16     | 0.67  | yes | down | 1.3E-07 | yes | chr1  | intron   | internal intron | NA  | 1.41 | no  | up   | 0.06 | no  | 1.03 | no  | up   | 6.8E-02 | no  |
| ENSRNOT00000089338 : Lrba : A0A0G2JYI0   | 10.95 | yes | up   | 4.8E-12 | yes | chr2  | intron   | internal intron | NA  | 0.99 | no  | down | 0.94 | no  | 0.94 | no  | down | 4.5E-07 | yes |
| ENSRNOT00000004293 : Acbd3 : G3V6E4      | 2.42  | yes | up   | 1.4E-04 | yes | chr13 | intron   | internal intron | NA  | 1.09 | no  | up   | 0.40 | no  | 1.07 | no  | up   | 2.4E-14 | yes |
| MSTRG.19070.1 : Rrp7a : D4AE65           | 1.73  | yes | up   | 1.3E-04 | yes | chr7  | intron   | internal intron | NA  | 0.70 | no  | down | 0.46 | no  | 0.94 | no  | down | 1.5E-02 | yes |
| ENSRNOT00000054980 : Tgfb1i1 : Q99PD6    | 3.08  | yes | up   | 7.2E-05 | yes | chr1  | intron   | internal intron | NA  | 0.80 | no  | down | 0.67 | no  | 1.06 | no  | up   | 1.6E-04 | yes |
| ENSRNOT00000084109 : Macf1 : A0A0G2K9T4  | 0.36  | yes | down | 1.3E-05 | yes | chr5  | exon     | last exon       | NA  | 0.99 | no  | down | 0.95 | no  | 0.97 | no  | down | 9.0E-11 | yes |
| ENSRNOT00000093459 : Ndrgl : Q6JE36      | 0.37  | yes | down | 7.6E-09 | yes | chr7  | intron   | internal intron | NA  | 0.98 | no  | down | 0.40 | no  | 0.92 | no  | down | 4.9E-08 | yes |
| ENSRNOT00000008988 : At12 : F1LQ09       | 2.32  | yes | up   | 2.9E-04 | yes | chr6  | intron   | last intron     | NA  | 0.99 | no  | down | 0.74 | no  | 0.95 | no  | down | 8.9E-05 | yes |
| ENSRNOT00000080166 : Tinagl1 : Q4V8N0    | 0.10  | yes | down | 7.3E-25 | yes | chr5  | promoter | Distal          | LCP | 1.76 | no  | up   | 0.34 | no  | 0.89 | no  | down | 4.1E-08 | yes |
| MSTRG.16557.6 : Srrml : B2RYB3           | 2.05  | yes | up   | 2.0E-04 | yes | chr5  | intron   | internal intron | NA  | 0.85 | no  | down | 0.63 | no  | 1.10 | no  | up   | 2.8E-06 | yes |
| MSTRG.21176.11 : Inpp5d : F1M981         | 0.08  | yes | down | 9.9E-05 | yes | chr9  | intron   | internal intron | NA  | 0.53 | no  | down | 0.01 | yes | 1.08 | no  | up   | 3.1E-05 | yes |
| MSTRG.5482.22 : Ncor2 : A0A0G2JU91       | 2.16  | yes | up   | 1.6E-06 | yes | chr12 | intron   | internal intron | NA  | 0.93 | no  | down | 0.45 | no  | 1.01 | no  | up   | 7.1E-01 | no  |
| MSTRG.15963.2 : Ptpd : M0RB22            | 3.73  | yes | up   | 1.3E-08 | yes | chr5  | exon     | internal exon   | NA  | 0.76 | no  | down | 0.68 | no  | 1.01 | no  | up   | 5.3E-01 | no  |
| ENSRNOT00000010811 : Ndrgl : Q6JE36      | 0.37  | yes | down | 7.6E-09 | yes | chr7  | intron   | internal intron | NA  | 1.43 | no  | up   | 0.54 | no  | 0.92 | no  | down | 4.9E-08 | yes |
| MSTRG.4263.2 : Tnrc6 : D3ZRA6            | 0.39  | yes | down | 2.3E-06 | yes | chr10 | intron   | internal intron | NA  | 1.23 | no  | up   | 0.67 | no  | 1.07 | no  | up   | 1.9E-01 | no  |
| MSTRG.5897.2 : Cntn2 : G3V758            | 2.37  | yes | up   | 8.3E-06 | yes | chr13 | exon     | internal exon   | NA  | 0.96 | no  | down | 0.91 | no  | 1.00 | no  | down | 9.1E-01 | no  |
| MSTRG.19148.6 : Shank3 : A0A0U1RS13      | 3.23  | yes | up   | 4.3E-05 | yes | chr7  | exon     | first exon      | NA  | 0.86 | no  | down | 0.49 | no  | 0.98 | no  | down | 1.0E-02 | yes |
| MSTRG.16755.6 : Kif1b : A0A0G2KA12       | 3.65  | yes | up   | 7.4E-05 | yes | chr5  | intron   | internal intron | NA  | 0.59 | no  | down | 0.43 | no  | 1.05 | no  | up   | 6.5E-02 | no  |
| ENSRNOT00000029076 : Tpm3 : A0A140TAF0   | 0.37  | yes | down | 8.0E-05 | yes | chr2  | intron   | internal intron | NA  | 1.07 | no  | up   | 0.55 | no  | 1.03 | no  | up   | 4.4E-04 | yes |
| ENSRNOT00000027351 : Nt5c2 : D3ZMY7      | 17.59 | yes | up   | 5.0E-22 | yes | chr1  | exon     | last exon       | NA  | 0.76 | no  | down | 0.20 | no  | 0.92 | no  | down | 2.5E-12 | yes |
| MSTRG.2579.6 : Sfxn3 : Q6P6T0            | 0.39  | yes | down | 7.8E-05 | yes | chr1  | intron   | internal intron | NA  | 0.62 | no  | down | 0.36 | no  | 1.12 | no  | up   | 6.4E-07 | yes |
| MSTRG.18268.19 : Akap8 : Q63014          | 0.08  | yes | down | 2.7E-04 | yes | chr7  | intron   | internal intron | NA  | 1.07 | no  | up   | 0.79 | no  | 0.99 | no  | down | 2.8E-01 | no  |
| ENSRNOT00000039663 : Ubr4 : A0A0G2JU89   | 2.84  | yes | up   | 3.7E-05 | yes | chr5  | intron   | internal intron | NA  | 0.94 | no  | down | 0.40 | no  | 1.02 | no  | up   | 4.6E-05 | yes |
| MSTRG.8552.4 : Ddx46 : Q62780            | 0.56  | yes | down | 3.4E-04 | yes | chr17 | intron   | internal intron | NA  | 0.93 | no  | down | 0.50 | no  | 0.98 | no  | down | 1.3E-01 | no  |
| MSTRG.16008.1 : Dennd4c : F1LTD7         | 0.31  | yes | down | 2.0E-04 | yes | chr5  | intron   | internal intron | NA  | 1.64 | no  | up   | 0.65 | no  | 0.97 | no  | down | 9.0E-02 | no  |
| MSTRG.16592.1 : Kdm1a : A0A0G2K736       | 0.26  | yes | down | 3.7E-04 | yes | chr5  | intron   | internal intron | NA  | 1.16 | no  | up   | 0.56 | no  | 1.01 | no  | up   | 5.0E-01 | no  |
| ENSRNOT00000014533 : Tifa : Q5XIB9       | 0.42  | yes | down | 9.5E-05 | yes | chr2  | exon     | internal exon   | NA  | 1.38 | no  | up   | 0.12 | no  | 1.16 | no  | up   | 2.8E-04 | yes |
| MSTRG.2622.2 : Nt5c2 : D3ZMY7            | 17.59 | yes | up   | 5.0E-22 | yes | chr1  | exon     | last exon       | NA  | 0.88 | no  | down | 0.32 | no  | 0.92 | no  | down | 2.5E-12 | yes |
| MSTRG.8278.5 : Rbpms : F2Z3S5            | 0.02  | yes | down | 2.6E-05 | yes | chr16 | promoter | Proximal        | ICP | 1.30 | no  | up   | 0.57 | no  | 1.06 | no  | up   | 4.9E-05 | yes |
| MSTRG.1783.7 : Tgfb1i1 : Q99PD6          | 3.08  | yes | up   | 7.2E-05 | yes | chr1  | intron   | internal intron | NA  | 1.06 | no  | up   | 0.82 | no  | 1.06 | no  | up   | 1.6E-04 | yes |
| ENSRNOT00000000814 : Ptpdc : P04157      | 2.98  | yes | up   | 6.9E-14 | yes | chr13 | intron   | internal intron | NA  | 0.86 | no  | down | 0.83 | no  | 1.12 | no  | up   | 6.1E-15 | yes |
| MSTRG.21175.3 : Inpp5d : F1M981          | 0.08  | yes | down | 9.9E-05 | yes | chr9  | intron   | internal intron | NA  | 0.86 | no  | down | 0.53 | no  | 1.08 | no  | up   | 3.1E-05 | yes |
| MSTRG.19188.4 : Rpap3 : Q68FQ7           | 0.29  | yes | down | 4.9E-05 | yes | chr7  | intron   | internal intron | NA  | 0.97 | no  | down | 0.90 | no  | 1.04 | no  | up   | 2.9E-04 | yes |
| MSTRG.2881.1 : Pkd1 : Q9ERV0             | inf   | yes | up   | 6.6E-05 | yes | chr10 | intron   | internal intron | NA  | 0.87 | no  | down | 0.84 | no  | 1.19 | no  | up   | 9.8E-07 | yes |
| MSTRG.14695.6 : Ptdc3 : D3ZGM1           | 3.88  | yes | up   | 4.1E-35 | yes | chr4  | intron   | internal intron | NA  | 1.04 | no  | up   | 0.94 | no  | 0.98 | no  | down | 3.1E-01 | no  |
| MSTRG.14881.3 : Aplf : F6Q5G6            | 0.12  | yes | down | 8.1E-06 | yes | chr4  | exon     | last exon       | NA  | 1.05 | no  | up   | 0.76 | no  | 0.99 | no  | down | 2.8E-01 | no  |
| MSTRG.10689.1 : Cdh6 : F1LQP8            | 3.77  | yes | up   | 4.7E-05 | yes | chr2  | intron   | internal intron | NA  | 1.44 | no  | up   | 0.14 | no  | 1.08 | no  | up   | 1.9E-09 | yes |
| MSTRG.16771.4 : H6pd : D4A7D7            | 0.22  | yes | down | 2.6E-06 | yes | chr5  | intron   | last intron     | NA  | 0.58 | no  | down | 0.59 | no  | 1.14 | no  | up   | 9.6E-15 | yes |
| MSTRG.20266.1 : Dag1 : F1M8K0            | 2.95  | yes | up   | 1.4E-04 | yes | chr8  | exon     | first exon      | NA  | 1.01 | no  | up   | 0.20 | no  | 0.91 | no  | down | 7.5E-12 | yes |
| MSTRG.5958.3 : Crsp1 : P47875            | 1.98  | yes | up   | 3.9E-04 | yes | chr13 | promoter | Intermediate    | LCP | 8.12 | yes | up   | 0.12 | no  | 1.11 | no  | up   | 3.1E-08 | yes |
| MSTRG.20927.7 : Aox1 : F1LRQ1            | 0.36  | yes | down | 1.5E-07 | yes | chr9  | intron   | internal intron | NA  | 1.37 | no  | up   | 0.03 | yes | 0.73 | yes | down | 3.5E-17 | yes |
| MSTRG.4030.3 : Eftud2 : F1LM66           | 4.66  | yes | up   | 6.0E-04 | yes | chr10 | exon     | internal exon   | NA  | 0.76 | no  | down | 0.23 | no  | 1.02 | no  | up   | 4.9E-02 | yes |
| MSTRG.3421.1 : Nup88 : O08658            | 0.25  | yes | down | 1.2E-04 | yes | chr10 | intron   | internal intron | NA  | 0.79 | no  | down | 0.51 | no  | 0.95 | no  | down | 3.4E-05 | yes |
| MSTRG.21427.1 : Rbm3 : G3V6P6            | 5.50  | yes | up   | 1.2E-04 | yes | chrX  | intron   | first intron    | NA  | 0.87 | no  | down | 0.69 | no  | 0.93 | no  | down | 8.6E-07 | yes |
| MSTRG.17687.1 : Lgmn : Q5PPG2            | 2.26  | yes | up   | 3.7E-04 | yes | chr6  | intron   | internal intron | NA  | 1.13 | no  | up   | 0.87 | no  | 1.15 | no  | up   | 3.3E-08 | yes |
| MSTRG.19968.1 : Myzap : Q5EB94           | 0.16  | yes | down | 3.6E-06 | yes | chr8  | exon     | last exon       | NA  | 1.08 | no  | up   | 0.68 | no  | 0.84 | no  | down | 4.4E-10 | yes |
| ENSRNOT00000043907 : Dennd1b : F1M3B0    | 0.50  | yes | down | 5.1E-04 | yes | chr13 | promoter | Distal          | HCP | 1.07 | no  | up   | 0.58 | no  | 0.99 | no  | down | 8.0E-01 | no  |
| MSTRG.19125.1 : Brd1 : D3ZUW8            | 7.17  | yes | up   | 3.3E-04 | yes | chr7  | exon     | internal exon   | NA  | 0.94 | no  | down | 0.96 | no  | 1.21 | yes | up   | 6.4E-02 | no  |
| ENSRNOT00000003224 : Sgcd : F1LYS7       | 0.12  | yes | down | 5.4E-11 | yes | chr10 | intron   | internal intron | NA  | 1.27 | no  | up   | 0.08 | no  | 0.81 | yes | down | 2.9E-17 | yes |
| ENSRNOT00000017265 : Rprdlb : B5DEK0     | 0.05  | yes | down | 1.1E-04 | yes | chr3  | intron   | last intron     | NA  | 1.02 | no  | up   | 0.94 | no  | 0.98 | no  | down | 1.8E-03 | yes |
| MSTRG.6211.6 : Fcgr2b : A3RLA8           | 0.44  | yes | down | 2.8E-04 | yes | chr13 | promoter | Distal          | LCP | 0.95 | no  | down | 0.89 | no  | 1.04 | no  | up   | 4.3E-03 | yes |
| ENSRNOT00000042890 : Opeml : F1M2I5      | 2.41  | yes | up   | 1.6E-04 | yes | chr8  | intron   | last intron     | NA  | 1.02 | no  | up   | 0.91 | no  | 0.91 | no  | down | 2.1E-15 | yes |
| MSTRG.10872.2 : Mccc1 : F1LP30           | 0.34  | yes | down | 1.3E-04 | yes | chr2  | intron   | internal intron | NA  | 1.03 | no  | up   | 0.47 | no  | 0.96 | no  | down | 1.3E-08 | yes |
| ENSRNOT000000083942 : Unc93b1 : D3ZDJ4   | 3.27  | yes | up   | 6.0E-05 | yes | chr1  | intron   | internal intron | NA  | 1.00 | no  | down | 0.99 | no  | 1.19 | no  | up   | 9.2E-05 | yes |
| MSTRG.16609                              |       |     |      |         |     |       |          |                 |     |      |     |      |      |     |      |     |      |         |     |

|                                           |       |     |      |         |     |       |          |                 |     |      |     |      |      |     |      |     |      |         |     |
|-------------------------------------------|-------|-----|------|---------|-----|-------|----------|-----------------|-----|------|-----|------|------|-----|------|-----|------|---------|-----|
| ENSRNOT00000092043 : Unkl : D4A3S7        | 2.08  | yes | up   | 2.1E-04 | yes | chr10 | intron   | internal intron | NA  | 0.93 | no  | down | 0.32 | no  | 0.84 | no  | down | 1.1E-15 | yes |
| MSTRG.3645.12 : Slfn13 : A0A096MKD0       | 2.27  | yes | up   | 1.5E-04 | yes | chr10 | promoter | Intermediate    | LCP | 1.30 | no  | up   | 0.53 | no  | 0.97 | no  | down | 2.7E-02 | yes |
| ENSRNOT00000083484 : B3glt : A0A0G2JUT7   | 0.28  | yes | down | 9.0E-07 | yes | chr12 | intron   | internal intron | NA  | 0.44 | yes | down | 0.31 | no  | 0.86 | no  | down | 1.3E-06 | yes |
| MSTRG.14075.1 : Dnajc5 : A0A0G2JX56       | 0.30  | yes | down | 1.1E-06 | yes | chr3  | promoter | Intermediate    | HCP | 0.46 | yes | down | 0.18 | no  | 0.89 | no  | down | 4.0E-08 | yes |
| ENSRNOT000000029166 : Alg9 : D3ZCW5       | 0.10  | yes | down | 9.3E-08 | yes | chr8  | intron   | first intron    | NA  | 1.16 | no  | up   | 0.42 | no  | 1.11 | no  | up   | 6.0E-03 | yes |
| MSTRG.20284.1 : Qrich1 : F1M4M7           | 3.68  | yes | up   | 3.4E-07 | yes | chr8  | exon     | internal exon   | NA  | 1.71 | no  | up   | 0.24 | no  | 1.03 | no  | up   | 2.0E-01 | no  |
| ENSRNOT00000045373 : Traml : Q5XI41       | 3.29  | yes | up   | 2.9E-05 | yes | chr5  | exon     | last exon       | NA  | 0.97 | no  | down | 0.47 | no  | 1.13 | no  | up   | 1.2E-09 | yes |
| ENSRNOT00000038566 : Cped1 : A0A0G2QC10   | 1.61  | yes | up   | 4.5E-04 | yes | chr4  | intron   | internal intron | NA  | 1.46 | no  | up   | 0.54 | no  | 1.07 | no  | up   | 1.5E-03 | yes |
| ENSRNOT00000035309 : Heatr5a : FILSK5     | 0.05  | yes | down | 7.6E-05 | yes | chr6  | intron   | internal intron | NA  | 0.64 | no  | down | 0.04 | yes | 0.98 | no  | down | 2.4E-01 | no  |
| MSTRG.8351.10 : Adam9 : E9PTA4            | 0.15  | yes | down | 9.7E-05 | yes | chr16 | intron   | internal intron | NA  | 1.14 | no  | up   | 0.75 | no  | 1.06 | no  | up   | 3.4E-02 | yes |
| MSTRG.12896.4 : Rabgap1 : D3ZX42          | 3.82  | yes | up   | 8.1E-06 | yes | chr3  | intron   | internal intron | NA  | 1.37 | no  | up   | 0.39 | no  | 1.01 | no  | up   | 1.9E-01 | no  |
| ENSRNOT000000085126 : Vcl : P85972        | 0.35  | yes | down | 3.5E-07 | yes | chr15 | intron   | internal intron | NA  | 0.84 | no  | down | 0.51 | no  | 0.88 | no  | down | 2.8E-16 | yes |
| MSTRG.9889.11 : Nflx : F2Z3R4             | 0.58  | yes | down | 1.9E-06 | yes | chr19 | intron   | internal intron | NA  | 0.68 | no  | down | 0.45 | no  | 0.77 | yes | down | 2.4E-14 | yes |
| ENSRNOT00000085390 : Acbd3 : G3V6E4       | 2.42  | yes | up   | 1.4E-04 | yes | chr13 | intron   | internal intron | NA  | 1.04 | no  | up   | 0.16 | no  | 1.07 | no  | up   | 2.4E-14 | yes |
| MSTRG.20323.2 : Ptpn23 : F1M951           | 1.59  | yes | up   | 2.2E-04 | yes | chr8  | exon     | internal exon   | NA  | 0.66 | no  | down | 0.09 | no  | 0.98 | no  | down | 1.3E-03 | yes |
| MSTRG.11953.33 : RT1-CE7 : D3ZLE6         | inf   | yes | up   | 7.3E-07 | yes | chr20 | exon     | internal exon   | NA  | 1.83 | no  | up   | 0.06 | no  | 1.22 | yes | up   | 7.3E-16 | yes |
| MSTRG.13870.10 : Plcg1 : G3V845           | 0.24  | yes | down | 1.1E-04 | yes | chr3  | intron   | first intron    | NA  | 1.00 | no  | down | 0.93 | no  | 0.94 | no  | down | 1.8E-09 | yes |
| ENSRNOT00000080788 : Wnk1 : Q9JIH7        | 18.77 | yes | up   | 1.6E-38 | yes | chr4  | exon     | internal exon   | NA  | 0.83 | no  | down | 0.60 | no  | 1.04 | no  | up   | 1.7E-03 | yes |
| ENSRNOT00000076030 : Parp4 : A0A096MJ98   | 1.23  | yes | up   | 1.1E-06 | yes | chr15 | intron   | last intron     | NA  | 0.62 | no  | down | 0.14 | no  | 1.00 | no  | down | 9.9E-01 | no  |
| ENSRNOT00000019359 : Smchd1 : D4AAG8      | 0.20  | yes | down | 3.0E-04 | yes | chr9  | intron   | internal intron | NA  | 1.12 | no  | up   | 0.25 | no  | 0.97 | no  | down | 2.5E-04 | yes |
| MSTRG.4894.1 : Yeats2 : D3ZBV9            | 4.61  | yes | up   | 5.1E-05 | yes | chr11 | intron   | internal intron | NA  | 0.95 | no  | down | 0.64 | no  | 1.11 | no  | up   | 2.4E-05 | yes |
| MSTRG.1201.7 : Ntrk3 : Q68G04             | 7.03  | yes | up   | 1.5E-06 | yes | chr1  | intron   | internal intron | NA  | 1.06 | no  | up   | 0.94 | no  | 0.87 | no  | down | 1.8E-07 | yes |
| ENSRNOT00000077301 : Atp5d : G3V7Y3       | 0.12  | yes | down | 5.2E-08 | yes | chr7  | promoter | Distal          | LCP | 1.06 | no  | up   | 0.83 | no  | 0.90 | no  | down | 7.4E-12 | yes |
| ENSRNOT00000082271 : Plec : Q6S395        | 0.33  | yes | down | 4.2E-06 | yes | chr7  | exon     | last exon       | NA  | 1.04 | no  | up   | 0.53 | no  | 1.03 | no  | up   | 2.2E-01 | no  |
| MSTRG.19148.11 : Shank3 : A0A0U1RS13      | 3.23  | yes | up   | 4.3E-05 | yes | chr7  | exon     | first exon      | NA  | 0.54 | no  | down | 0.30 | no  | 0.98 | no  | down | 1.0E-02 | yes |
| ENSRNOT00000007367 : Rbm3 : G3V6P6        | 5.50  | yes | up   | 1.2E-04 | yes | chrX  | intron   | first intron    | NA  | 0.51 | no  | down | 0.21 | no  | 0.93 | no  | down | 8.6E-07 | yes |
| ENSRNOT00000083354 : Kmt2d : A0A0G2JVD6   | 6.53  | yes | up   | 2.1E-09 | yes | chr7  | exon     | last exon       | NA  | 0.86 | no  | down | 0.91 | no  | 1.03 | no  | up   | 3.5E-02 | yes |
| MSTRG.16609.2 : Ece1 : Q6IN10             | 0.58  | yes | down | 9.3E-05 | yes | chr5  | intron   | internal intron | NA  | 0.89 | no  | down | 0.95 | no  | 1.14 | no  | up   | 8.3E-15 | yes |
| ENSRNOT00000087181 : Fkbp11 : G3V7V5      | inf   | yes | up   | 4.7E-06 | yes | chr7  | intron   | internal intron | NA  | 0.73 | no  | down | 0.23 | no  | 1.06 | no  | up   | 1.6E-07 | yes |
| MSTRG.11091.6 : Gucyl3 : P19686           | 0.26  | yes | down | 3.9E-06 | yes | chr2  | intron   | internal intron | NA  | 2.33 | yes | up   | 0.05 | yes | 0.85 | no  | down | 1.4E-12 | yes |
| MSTRG.2579.5 : Sfxn3 : Q6P6T0             | 0.39  | yes | down | 7.8E-05 | yes | chr1  | intron   | internal intron | NA  | 0.48 | yes | down | 0.08 | no  | 1.12 | no  | up   | 6.4E-07 | yes |
| ENSRNOT000000093605 : Eftud2 : FILM66     | 4.66  | yes | up   | 6.0E-04 | yes | chr10 | exon     | internal exon   | NA  | 0.86 | no  | down | 0.16 | no  | 1.02 | no  | up   | 4.9E-02 | yes |
| MSTRG.12973.10 : Rbmsl1 : A0A0G2K4R7      | 0     | yes | down | 3.3E-05 | yes | chr3  | intron   | internal intron | NA  | 1.27 | no  | up   | 0.14 | no  | 0.97 | no  | down | 1.2E-01 | no  |
| MSTRG.12240.2 : Bicc1 : A0A0G2K0Y0        | 5.19  | yes | up   | 5.0E-04 | yes | chr20 | intron   | internal intron | NA  | 0.69 | no  | down | 0.68 | no  | 1.52 | yes | up   | 1.2E-05 | yes |
| MSTRG.3645.3 : Slfn13 : A0A096MKD0        | 2.27  | yes | up   | 1.5E-04 | yes | chr10 | promoter | Intermediate    | LCP | 0.81 | no  | down | 0.72 | no  | 0.97 | no  | down | 2.7E-02 | yes |
| ENSRNOT00000092881 : Gtf2i : Q5U2Y1       | 5.31  | yes | up   | 4.9E-06 | yes | chr12 | promoter | Distal          | LCP | 0.99 | no  | down | 0.72 | no  | 0.95 | no  | down | 1.5E-07 | yes |
| MSTRG.15361.1 : Recql : Q6AYJ1            | 0.74  | yes | down | 1.2E-04 | yes | chr4  | exon     | last exon       | NA  | 0.78 | no  | down | 0.44 | no  | 0.97 | no  | down | 6.1E-03 | yes |
| MSTRG.7731.4 : Tsc22d1 : P62501           | 3.00  | yes | up   | 3.0E-04 | yes | chr15 | promoter | Intermediate    | ICP | 1.01 | no  | up   | 0.97 | no  | 0.77 | yes | down | 5.9E-09 | yes |
| MSTRG.11265.11 : Ubap21 : E9PTR4          | 6.62  | yes | up   | 4.0E-04 | yes | chr2  | intron   | internal intron | NA  | 1.27 | no  | up   | 0.34 | no  | 1.13 | no  | up   | 3.8E-12 | yes |
| MSTRG.5159.1 : Tecpr1 : Q3ZBA0            | 0.43  | yes | down | 3.1E-04 | yes | chr12 | promoter | Intermediate    | LCP | 1.32 | no  | up   | 0.21 | no  | 1.17 | no  | up   | 7.7E-08 | yes |
| MSTRG.17567.3 : Elmsan1 : D4ACA6          | 0.27  | yes | down | 2.9E-04 | yes | chr6  | exon     | last exon       | NA  | 1.35 | no  | up   | 0.09 | no  | 0.96 | no  | down | 1.9E-01 | no  |
| MSTRG.4485.1 : Runx1 : Q63046             | 0.62  | yes | down | 5.4E-05 | yes | chr11 | intron   | first intron    | NA  | 1.48 | no  | up   | 0.30 | no  | 1.47 | yes | up   | 3.2E-10 | yes |
| ENSRNOT00000046920 : Ttc28 : D3ZXP1       | 4.41  | yes | up   | 1.9E-04 | yes | chr12 | promoter | Intermediate    | LCP | 1.22 | no  | up   | 0.02 | yes | 0.86 | no  | down | 6.9E-05 | yes |
| ENSRNOT00000022594 : Pltp : E9PSP1        | 0.31  | yes | down | 3.6E-05 | yes | chr3  | intron   | internal intron | NA  | 0.98 | no  | down | 0.91 | no  | 0.93 | no  | down | 1.9E-11 | yes |
| ENSRNOT000000024493 : Tpm1 : Q923Z2       | 9.41  | yes | up   | 5.1E-14 | yes | chr8  | intron   | internal intron | NA  | 0.72 | no  | down | 0.44 | no  | 0.75 | yes | down | 6.0E-18 | yes |
| MSTRG.21176.5 : Inpp5d : F1M981           | 0.08  | yes | down | 9.9E-05 | yes | chr9  | intron   | internal intron | NA  | 0.75 | no  | down | 0.22 | no  | 1.08 | no  | up   | 3.1E-05 | yes |
| MSTRG.19819.1 : Neo1 : P97603             | 0     | yes | down | 3.5E-04 | yes | chr8  | promoter | Intermediate    | LCP | 0.50 | yes | down | 0.50 | no  | 0.98 | no  | down | 1.8E-02 | yes |
| ENSRNOT00000024718 : Dhx58 : D3ZD46       | 5.00  | yes | up   | 2.1E-04 | yes | chr10 | exon     | internal exon   | NA  | 1.14 | no  | up   | 0.73 | no  | 1.22 | yes | up   | 6.3E-08 | yes |
| ENSRNOT00000093467 : Atp6v1a : D4A133     | 0.36  | yes | down | 7.3E-06 | yes | chr11 | intron   | internal intron | NA  | 1.31 | no  | up   | 0.48 | no  | 1.08 | no  | up   | 1.1E-08 | yes |
| ENSRNOT00000084560 : Atad2b : A0A096MKAS  | 3.51  | yes | up   | 9.0E-07 | yes | chr6  | intron   | internal intron | NA  | 0.95 | no  | down | 0.86 | no  | 1.15 | no  | up   | 9.1E-06 | yes |
| MSTRG.17520.1 : Srsf5 : Q09167            | 0.10  | yes | down | 3.0E-09 | yes | chr6  | promoter | Proximal        | ICP | 2.16 | yes | up   | 0.37 | no  | 1.03 | no  | up   | 4.2E-02 | yes |
| ENSRNOT00000015247 : Atp13a1 : B5DEX7     | 3.83  | yes | up   | 1.1E-13 | yes | chr16 | intron   | internal intron | NA  | 0.46 | yes | down | 0.12 | no  | 1.09 | no  | up   | 4.2E-12 | yes |
| ENSRNOT00000092978 : Sema4a : A0A1B0GWV9  | 3.09  | yes | up   | 1.9E-04 | yes | chr2  | promoter | Intermediate    | LCP | 1.03 | no  | up   | 0.34 | no  | 1.07 | no  | up   | 2.4E-05 | yes |
| MSTRG.276.7 : Arid1b : FILNP1             | 1.53  | yes | up   | 6.5E-08 | yes | chr1  | promoter | Proximal        | LCP | 1.36 | no  | up   | 0.57 | no  | 0.98 | no  | down | 1.8E-01 | no  |
| MSTRG.12059.5 : Srsf3 : A0A0U1RRV7        | 4.40  | yes | up   | 1.5E-08 | yes | chr20 | intron   | internal intron | NA  | 1.69 | no  | up   | 0.36 | no  | 0.94 | no  | down | 5.5E-08 | yes |
| MSTRG.5280.3 : Taf6 : Q498R0              | 0.74  | yes | down | 2.2E-06 | yes | chr12 | intron   | internal intron | NA  | 0.79 | no  | down | 0.35 | no  | 0.91 | no  | down | 1.8E-03 | yes |
| MSTRG.3572.3 : RGD1307929 : FILSX1        | 7.34  | yes | up   | 1.1E-12 | yes | chr10 | intron   | internal intron | NA  | 3.07 | yes | up   | 0.03 | yes | 0.97 | no  | down | 1.8E-04 | yes |
| MSTRG.20501.3 : Trip10 : P97531           | 2.19  | yes | up   | 4.1E-04 | yes | chr9  | intron   | last intron     | NA  | 0.67 | no  | down | 0.67 | no  | 0.91 | no  | down | 4.8E-08 | yes |
| ENSRNOT00000091470 : Picalm : Q66WT9      | 8.74  | yes | up   | 2.1E-13 | yes | chr1  | intron   | internal intron | NA  | 1.31 | no  | up   | 0.64 | no  | 1.45 | yes | up   | 1.6E-10 | yes |
| MSTRG.323.7 : LOC108348175 : A0A0G2JUS0   | 0.05  | yes | down | 4.0E-19 | yes | chr1  | promoter | Intermediate    | LCP | 1.55 | no  | up   | 0.17 | no  | 1.01 | no  | up   | 4.0E-01 | no  |
| MSTRG.1651.1 : Mett19 : G0Z7P9            | inf   | yes | up   | 1.6E-04 | yes | chr1  | intron   | first intron    | NA  | 0.93 | no  | down | 0.63 | no  | 0.99 | no  | down | 7.9E-01 | no  |
| ENSRNOT00000092995 : Gtf2i : Q5U2Y1       | 5.31  | yes | up   | 4.9E-06 | yes | chr12 | promoter | Distal          | LCP | 0.92 | no  | down | 0.22 | no  | 0.95 | no  | down | 1.5E-07 | yes |
| MSTRG.20839.7 : Kdelc1 : B5DFA5           | 5.54  | yes | up   | 1.1E-06 | yes | chr9  | exon     | last exon       | NA  | 0.91 | no  | down | 0.18 | no  | 0.94 | no  | down | 8.4E-02 | no  |
| ENSRNOT000000022514 : Efs : B1WBZ1        | inf   | yes | up   | 1.8E-04 | yes | chr15 | promoter | Distal          | LCP | 1.07 | no  | up   | 0.82 | no  | 1.07 | no  | up   | 2.0E-01 | no  |
| ENSRNOT00000076329 : Synm : G3V9G5        | 1.68  | yes | up   | 3.0E-04 | yes | chr1  | exon     | last exon       | NA  | 0.97 | no  | down | 0.93 | no  | 0.82 | yes | down | 8.8E-13 | yes |
| MSTRG.11090.1 : Gucyl3 : P19686           | 0.26  | yes | down | 3.9E-06 | yes | chr2  | intron   | internal intron | NA  | 0.93 | no  | down | 0.53 | no  | 0.85 | no  | down | 1.4E-12 | yes |
| MSTRG.2788.1 : Hmox2 : P23711             | inf   | yes | up   | 5.3E-04 | yes | chr10 | exon     | last exon       | NA  | 1.69 | no  | up   | 0.44 | no  | 1.09 | no  | up   | 4.1E-06 | yes |
| MSTRG.22041.5 : Dkc1 : P40615             | 0.28  | yes | down | 2.4E-05 | yes | chrX  | intron   | internal intron | NA  | 1.15 | no  | up   | 0.20 | no  | 0.99 | no  | down | 3.6E-01 | no  |
| ENSRNOT000000056727 : Plscr1 : A0A0G2K7Q1 | 0.33  | yes | down | 1.3E-05 | yes | chr8  | promoter | Distal          | LCP | 1.28 | no  | up   | 0.37 | no  | 1.08 | no  | up   | 5.2E-06 | yes |
| MSTRG.6812.7 : Pcdh7 : Q68HB8             | 0     | yes | down | 4.2E-04 | yes | chr14 | exon     | last exon       | NA  | 0.99 | no  | down | 0.72 | no  | 0.94 | no  | down | 1.0E-07 | yes |
| MSTRG.15096.2 : Caenalc : F1MA84          | 4.75  | yes | up   | 4.3E-04 | yes | chr4  | intron   | internal intron | NA  | 2.50 | yes | up   | 0.15 | no  | 0.97 | no  | down | 2.7E-02 | yes |

|                                           |       |     |      |         |     |       |          |                 |     |      |     |      |      |     |      |     |      |         |     |
|-------------------------------------------|-------|-----|------|---------|-----|-------|----------|-----------------|-----|------|-----|------|------|-----|------|-----|------|---------|-----|
| MSTRG.5399.2 : Eln : A0A0G2JST5           | 3.55  | yes | up   | 3.0E-04 | yes | chr12 | intron   | internal intron | NA  | 0.75 | no  | down | 0.06 | no  | 0.91 | no  | down | 1.2E-01 | no  |
| ENSRNOT00000085410 : Arhgap4 : A0A0G2JVF0 | 0.34  | yes | down | 1.4E-05 | yes | chrX  | intron   | internal intron | NA  | 1.62 | no  | up   | 0.21 | no  | 1.07 | no  | up   | 7.1E-04 | yes |
| MSTRG.9752.1 : Coq9 : Q68FT1              | 0.32  | yes | down | 5.1E-11 | yes | chr19 | promoter | Distal          | LCP | 0.92 | no  | down | 0.67 | no  | 0.93 | no  | down | 1.8E-05 | yes |
| MSTRG.9721.4 : Cdh11 : F1MAH6             | 1.94  | yes | up   | 2.2E-05 | yes | chr19 | exon     | last exon       | NA  | 1.15 | no  | up   | 0.92 | no  | 0.91 | no  | down | 6.5E-11 | yes |
| MSTRG.7186.4 : Sptbn1 : A0A0G2K8W9        | 5.72  | yes | up   | 4.0E-04 | yes | chr14 | intron   | internal intron | NA  | 0.33 | yes | down | 0.45 | no  | 0.87 | no  | down | 1.1E-18 | yes |
| MSTRG.19088.1 : Scube1 : F1M987           | 2.13  | yes | up   | 1.3E-04 | yes | chr7  | intron   | internal intron | NA  | 0.37 | yes | down | 0.20 | no  | 0.80 | yes | down | 1.2E-14 | yes |
| ENSRNOT00000035916 : Gnas : P63095        | 0.77  | yes | down | 3.7E-04 | yes | chr3  | promoter | Distal          | HCP | 0.80 | no  | down | 0.43 | no  | 0.90 | no  | down | 5.6E-15 | yes |
| MSTRG.21023.10 : Fn1 : F1LST1             | 0.11  | yes | down | 7.7E-11 | yes | chr9  | intron   | internal intron | NA  | 9.31 | yes | up   | 0.44 | no  | 1.27 | yes | up   | 4.1E-20 | yes |
| MSTRG.9721.7 : Cdh11 : F1MAH6             | 1.94  | yes | up   | 2.2E-05 | yes | chr19 | exon     | last exon       | NA  | 1.15 | no  | up   | 0.21 | no  | 0.91 | no  | down | 6.5E-11 | yes |
| ENSRNOT00000076030 : Parp4 : A0A096MJR6   | 1.23  | yes | up   | 1.1E-06 | yes | chr15 | intron   | last intron     | NA  | 0.62 | no  | down | 0.14 | no  | 0.95 | no  | down | 6.6E-05 | yes |
| ENSRNOT00000087893 : Fmr1 : Q80WE1        | inf   | yes | up   | 3.0E-04 | yes | chrX  | intron   | internal intron | NA  | 1.02 | no  | up   | 0.94 | no  | 1.09 | no  | up   | 7.3E-06 | yes |
| ENSRNOT00000016608 : Skap2 : Q920G0       | 0.26  | yes | down | 1.3E-08 | yes | chr4  | intron   | internal intron | NA  | 1.28 | no  | up   | 0.14 | no  | 1.23 | yes | up   | 9.4E-12 | yes |
| MSTRG.19692.2 : Zw10 : Q4V8C2             | 7.96  | yes | up   | 7.6E-05 | yes | chr8  | intron   | last intron     | NA  | 1.20 | no  | up   | 0.43 | no  | 1.01 | no  | up   | 2.9E-01 | no  |
| ENSRNOT00000077784 : Kif1b : A0A0G2KA12   | 3.65  | yes | up   | 7.4E-05 | yes | chr5  | intron   | internal intron | NA  | 0.70 | no  | down | 0.13 | no  | 1.05 | no  | up   | 6.5E-02 | no  |
| ENSRNOT00000015179 : Vcl : P85972         | 0.35  | yes | down | 3.5E-07 | yes | chr15 | intron   | internal intron | NA  | 0.80 | no  | down | 0.16 | no  | 0.88 | no  | down | 2.8E-16 | yes |
| MSTRG.11582.1 : Palmd : Q4KM62            | 0.16  | yes | down | 7.2E-05 | yes | chr2  | promoter | Distal          | LCP | 0.73 | no  | down | 0.03 | yes | 0.77 | yes | down | 4.3E-06 | yes |
| ENSRNOT00000084018 : Tbx3 : A0A0G2K8D7    | 2.83  | yes | up   | 2.0E-10 | yes | chr12 | intron   | internal intron | NA  | 0.62 | no  | down | 0.45 | no  | 0.99 | no  | down | 7.3E-01 | no  |
| MSTRG.16324.4 : Pabpc4 : G3V9N0           | 15.58 | yes | up   | 1.8E-05 | yes | chr5  | intron   | first intron    | NA  | 1.06 | no  | up   | 0.84 | no  | 1.10 | no  | up   | 6.8E-12 | yes |
| MSTRG.4716.7 : Adecy5 : G3V9G1            | 0.16  | yes | down | 2.3E-10 | yes | chr11 | intron   | internal intron | NA  | 1.36 | no  | up   | 0.21 | no  | 1.00 | no  | down | 7.6E-01 | no  |
| MSTRG.10104.2 : Sf3b3 : E9PT66            | 0.34  | yes | down | 3.6E-04 | yes | chr19 | exon     | last exon       | NA  | 0.94 | no  | down | 0.84 | no  | 0.97 | no  | down | 3.1E-07 | yes |
| ENSRNOT00000076193 : Ophn1 : P0CAX5       | 0.26  | yes | down | 5.2E-06 | yes | chrX  | exon     | last exon       | NA  | 0.97 | no  | down | 0.72 | no  | 0.94 | no  | down | 1.5E-02 | yes |
| MSTRG.4443.3 : Ltn1 : F1M9Q3              | 0.38  | yes | down | 4.2E-04 | yes | chr11 | intron   | internal intron | NA  | 0.56 | no  | down | 0.46 | no  | 1.08 | no  | up   | 1.4E-11 | yes |
| MSTRG.16324.3 : Pabpc4 : G3V9N0           | 15.58 | yes | up   | 1.8E-05 | yes | chr5  | intron   | first intron    | NA  | 0.98 | no  | down | 0.93 | no  | 1.10 | no  | up   | 6.8E-12 | yes |
| MSTRG.5280.6 : Taf6 : Q498R0              | 0.74  | yes | down | 2.2E-06 | yes | chr12 | intron   | internal intron | NA  | 1.14 | no  | up   | 0.66 | no  | 0.91 | no  | down | 1.8E-03 | yes |
| ENSRNOT00000018691 : Gpx4 : A0A0G2K398    | 0.42  | yes | down | 9.7E-05 | yes | chr7  | intron   | internal intron | NA  | 0.71 | no  | down | 0.26 | no  | 0.91 | no  | down | 1.6E-05 | yes |
| ENSRNOT00000074070 : Ces1f : M0R7R1       | 0.26  | yes | down | 2.8E-08 | yes | chr19 | intron   | internal intron | NA  | 0.79 | no  | down | 0.42 | no  | 0.86 | no  | down | 3.2E-11 | yes |
| MSTRG.11265.23 : Ubap2l : E9PTR4          | 6.62  | yes | up   | 4.0E-04 | yes | chr2  | intron   | internal intron | NA  | 0.50 | yes | down | 0.21 | no  | 1.13 | no  | up   | 3.8E-12 | yes |
| ENSRNOT00000079919 : Kif1b : A0A0G2KA12   | 3.65  | yes | up   | 7.4E-05 | yes | chr5  | intron   | internal intron | NA  | 1.68 | no  | up   | 0.34 | no  | 1.05 | no  | up   | 6.5E-02 | no  |
| MSTRG.19173.9 : Ano6 : A0A0G2K1M7         | 3.87  | yes | up   | 9.8E-09 | yes | chr7  | intron   | internal intron | NA  | 0.92 | no  | down | 0.45 | no  | 0.91 | no  | down | 2.1E-09 | yes |
| MSTRG.15855.4 : RGD1306148 : F1M446       | 0.22  | yes | down | 4.0E-05 | yes | chr5  | intron   | internal intron | NA  | 1.31 | no  | up   | 0.48 | no  | 1.01 | no  | up   | 7.4E-02 | no  |
| MSTRG.6691.2 : Pdgfra : G3V6A0            | 0.22  | yes | down | 1.6E-04 | yes | chr14 | intron   | last intron     | NA  | 1.12 | no  | up   | 0.62 | no  | 1.02 | no  | up   | 4.1E-02 | yes |
| ENSRNOT00000056022 : Fbn1 : G3V9M6        | 0.29  | yes | down | 5.0E-07 | yes | chr3  | intron   | internal intron | NA  | 0.89 | no  | down | 0.24 | no  | 0.99 | no  | down | 4.3E-01 | no  |
| ENSRNOT00000076197 : Smndc1 : Q4QQU6      | inf   | yes | up   | 1.3E-04 | yes | chr1  | promoter | Distal          | LCP | 0.94 | no  | down | 0.55 | no  | 1.06 | no  | up   | 2.2E-04 | yes |
| MSTRG.12655.4 : Gle1 : Q4KLN4             | 0.16  | yes | down | 1.6E-04 | yes | chr3  | promoter | Proximal        | LCP | 0.76 | no  | down | 0.26 | no  | 0.95 | no  | down | 1.3E-02 | yes |
| ENSRNOT00000064660 : Tor1a : Q68G38       | 3.04  | yes | up   | 5.0E-05 | yes | chr3  | exon     | last exon       | NA  | 1.14 | no  | up   | 0.16 | no  | 1.02 | no  | up   | 1.6E-01 | no  |
| ENSRNOT00000008200 : Lrpprc : F1LM33      | 0.61  | yes | down | 7.5E-05 | yes | chr6  | intron   | internal intron | NA  | 1.04 | no  | up   | 0.59 | no  | 0.97 | no  | down | 4.6E-07 | yes |
| MSTRG.3296.4 : Gas7 : M0R4R4              | 4.60  | yes | up   | 4.0E-11 | yes | chr10 | intron   | first intron    | NA  | 0.97 | no  | down | 0.88 | no  | 1.22 | yes | up   | 2.5E-15 | yes |
| ENSRNOT00000021286 : Epn1 : O88339        | 2.09  | yes | up   | 1.9E-04 | yes | chr1  | intron   | internal intron | NA  | 1.17 | no  | up   | 0.49 | no  | 0.99 | no  | down | 3.7E-01 | no  |
| MSTRG.7171.3 : Efmpl1 : Q6AXN2            | 0.06  | yes | down | 2.6E-05 | yes | chr14 | exon     | last exon       | NA  | 0.36 | yes | down | 0.02 | yes | 0.94 | no  | down | 1.1E-08 | yes |
| ENSRNOT00000020763 : Pgm5 : D3ZVR9        | 2.44  | yes | up   | 4.5E-04 | yes | chr1  | intron   | last intron     | NA  | 0.56 | no  | down | 0.59 | no  | 1.01 | no  | up   | 3.2E-01 | no  |
| MSTRG.7780.5 : Lmo7 : A0A0G2K174          | 3.35  | yes | up   | 1.2E-04 | yes | chr15 | intron   | internal intron | NA  | 0.87 | no  | down | 0.78 | no  | 0.96 | no  | down | 4.2E-06 | yes |
| MSTRG.16606.2 : Alpl : P08289             | 0.52  | yes | down | 2.4E-04 | yes | chr5  | promoter | Intermediate    | LCP | 2.61 | yes | up   | 0.20 | no  | 1.00 | no  | down | 6.2E-01 | no  |
| MSTRG.6164.1 : Mpc2 : P38718              | 0.25  | yes | down | 5.7E-05 | yes | chr13 | promoter | Intermediate    | ICP | 1.20 | no  | up   | 0.35 | no  | 0.90 | no  | down | 1.6E-06 | yes |
| ENSRNOT00000016442 : Prkcb : A0A0G2K5Q0   | 3.82  | yes | up   | 4.6E-04 | yes | chr1  | intron   | internal intron | NA  | 1.53 | no  | up   | 0.19 | no  | 1.10 | no  | up   | 1.7E-07 | yes |
| ENSRNOT00000009737 : Atp6v1f : P50408     | 3.83  | yes | up   | 8.5E-07 | yes | chr4  | exon     | last exon       | NA  | 0.22 | yes | down | 0.24 | no  | 1.10 | no  | up   | 1.4E-09 | yes |
| MSTRG.21909.3 : Acsl4 : O35547            | 0.19  | yes | down | 1.2E-04 | yes | chrX  | intron   | internal intron | NA  | 0.89 | no  | down | 0.39 | no  | 1.22 | yes | up   | 2.0E-10 | yes |
| ENSRNOT00000093052 : Picalm : Q66SY1      | 8.74  | yes | up   | 2.1E-13 | yes | chr1  | intron   | internal intron | NA  | 1.05 | no  | up   | 0.84 | no  | 1.13 | no  | up   | 1.1E-06 | yes |
| MSTRG.1907.1 : Ptdss2 : B2GV22            | 0.17  | yes | down | 6.9E-07 | yes | chr1  | intron   | internal intron | NA  | 1.01 | no  | up   | 0.97 | no  | 0.94 | no  | down | 7.1E-04 | yes |
| MSTRG.15948.2 : Cdk5rap2 : F1M4B7         | 0     | yes | down | 1.4E-04 | yes | chr5  | intron   | internal intron | NA  | 1.01 | no  | up   | 0.98 | no  | 0.98 | no  | down | 2.6E-01 | no  |
| ENSRNOT00000081534 : Ncstn : Q8CGU6       | 0.30  | yes | down | 6.8E-05 | yes | chr13 | intron   | first intron    | NA  | 0.95 | no  | down | 0.90 | no  | 1.02 | no  | up   | 4.0E-02 | yes |
| ENSRNOT00000024732 : Chd5 : D3ZR50        | 0.12  | yes | down | 1.1E-04 | yes | chr5  | intron   | internal intron | NA  | 0.93 | no  | down | 0.31 | no  | 0.87 | no  | down | 3.8E-03 | yes |
| MSTRG.20352.16 : Ubp1 : D4A030            | 0.44  | yes | down | 2.3E-04 | yes | chr8  | intron   | internal intron | NA  | 0.94 | no  | down | 0.22 | no  | 0.98 | no  | down | 1.9E-01 | no  |
| ENSRNOT00000086352 : Col5a1 : G3V763      | 0.33  | yes | down | 4.5E-04 | yes | chr3  | intron   | internal intron | NA  | 0.97 | no  | down | 0.76 | no  | 1.08 | no  | up   | 2.2E-06 | yes |
| MSTRG.3645.5 : Slfn13 : A0A096MKD0        | 2.27  | yes | up   | 1.5E-04 | yes | chr10 | promoter | Intermediate    | LCP | 0.89 | no  | down | 0.50 | no  | 0.97 | no  | down | 2.7E-02 | yes |
| MSTRG.8727.2 : Dsp : F1LMV6               | inf   | yes | up   | 5.3E-04 | yes | chr17 | intron   | internal intron | NA  | 1.03 | no  | up   | 0.93 | no  | 1.01 | no  | up   | 5.1E-01 | no  |
| ENSRNOT00000003759 : Selp : A0A096MK10    | inf   | yes | up   | 7.4E-05 | yes | chr13 | promoter | Distal          | LCP | 4.13 | yes | up   | 0.23 | no  | 0.93 | no  | down | 6.5E-03 | yes |
| ENSRNOT00000066281 : Arhgef18 : F1LT94    | 0.62  | yes | down | 4.6E-05 | yes | chr12 | exon     | internal exon   | NA  | 1.01 | no  | up   | 0.09 | no  | 0.93 | no  | down | 5.9E-05 | yes |
| MSTRG.110.5 : Lama2 : F1M614              | 0.44  | yes | down | 4.4E-04 | yes | chr1  | intron   | internal intron | NA  | 1.02 | no  | up   | 0.49 | no  | 1.06 | no  | up   | 1.3E-07 | yes |
| MSTRG.11139.4 : Lrba : A0A0G2JY10         | 10.95 | yes | up   | 4.8E-12 | yes | chr2  | intron   | internal intron | NA  | 0.91 | no  | down | 0.74 | no  | 0.94 | no  | down | 4.5E-07 | yes |
| ENSRNOT00000079695 : Ipo8 : A0A0G2K6J6    | 3.66  | yes | up   | 4.4E-04 | yes | chr4  | intron   | internal intron | NA  | 1.07 | no  | up   | 0.78 | no  | 1.07 | no  | up   | 4.0E-07 | yes |
| ENSRNOT00000032152 : Dlat : P08461        | 4.32  | yes | up   | 2.7E-04 | yes | chr8  | intron   | internal intron | NA  | 1.11 | no  | up   | 0.39 | no  | 0.96 | no  | down | 3.7E-05 | yes |
| MSTRG.12277.3 : Ctnna3 : B2RYN9           | 0     | yes | down | 1.3E-06 | yes | chr20 | promoter | Distal          | LCP | 0.95 | no  | down | 0.84 | no  | 1.03 | no  | up   | 1.7E-01 | no  |
| MSTRG.20350.2 : Clasp2 : A0A0G2JZM8       | 0.25  | yes | down | 1.3E-05 | yes | chr8  | intron   | internal intron | NA  | 0.77 | no  | down | 0.40 | no  | 0.98 | no  | down | 1.8E-01 | no  |
| ENSRNOT00000056145 : Ptpn23 : F1M951      | 1.59  | yes | up   | 2.2E-04 | yes | chr8  | exon     | internal exon   | NA  | 0.91 | no  | down | 0.51 | no  | 0.98 | no  | down | 1.3E-03 | yes |
| ENSRNOT00000003713 : Npl : Q66H59         | 2.35  | yes | up   | 1.9E-05 | yes | chr13 | intron   | internal intron | NA  | 0.80 | no  | down | 0.55 | no  | 1.08 | no  | up   | 5.3E-06 | yes |
| MSTRG.18557.4 : Mon2 : D3ZCG3             | 0.07  | yes | down | 1.5E-08 | yes | chr7  | intron   | internal intron | NA  | 0.96 | no  | down | 0.83 | no  | 1.05 | no  | up   | 7.1E-07 | yes |
| MSTRG.10603.3 : Nnt : Q5BJZ3              | 3.00  | yes | up   | 1.8E-04 | yes | chr2  | intron   | internal intron | NA  | 0.57 | no  | down | 0.19 | no  | 0.96 | no  | down | 1.2E-07 | yes |
| MSTRG.10154.1 : Cmp1 : A0A0G2JYB9         | 0.58  | yes | down | 9.9E-05 | yes | chr19 | intron   | internal intron | NA  | 0.91 | no  | down | 0.71 | no  | 0.89 | no  | down | 2.1E-04 | yes |
| ENSRNOT00000079432 : Asph : A0A096MKE0    | 2.56  | yes | up   | 9.8E-06 | yes | chr5  | intron   | internal intron | NA  | 0.86 | no  | down | 0.50 | no  | 0.99 | no  | down | 1.3E-01 | no  |
| ENSRNOT000000019453 : RGD1563354 : F1M4P5 | 0.18  | yes | down | 5.6E-06 | yes | chr3  | promoter | Distal          | LCP | 1.69 | no  | up   | 0.06 | no  | 0.66 | yes | down | 1.6E-11 | yes |
| MSTRG.19538.10 : Nfrikb : D4A421          | 0.58  | yes | down | 1.3E-05 | yes | chr8  |          |                 |     |      |     |      |      |     |      |     |      |         |     |

|                                         |      |     |      |         |     |       |          |                 |     |      |     |      |      |     |      |     |      |         |     |
|-----------------------------------------|------|-----|------|---------|-----|-------|----------|-----------------|-----|------|-----|------|------|-----|------|-----|------|---------|-----|
| MSTRG.18723.3 : Deptor : F1M8Y4         | 2.15 | yes | up   | 9.9E-15 | yes | chr7  | intron   | internal intron | NA  | 0.56 | no  | down | 0.40 | no  | 0.97 | no  | down | 2.0E-01 | no  |
| MSTRG.19538.8 : Nfirkb : D4A421         | 0.58 | yes | down | 1.3E-05 | yes | chr8  | intron   | internal intron | NA  | 1.27 | no  | up   | 0.39 | no  | 0.89 | no  | down | 2.5E-03 | yes |
| MSTRG.15089.2 : Csgalnact2 : D4A5Z0     | 2.74 | yes | up   | 6.9E-07 | yes | chr4  | intron   | internal intron | NA  | 0.58 | no  | down | 0.19 | no  | 0.94 | no  | down | 1.2E-02 | yes |
| MSTRG.19220.1 : Kmt2d : A0A0G2JVD6      | 6.53 | yes | up   | 2.1E-09 | yes | chr7  | exon     | last exon       | NA  | 0.98 | no  | down | 0.97 | no  | 1.03 | no  | up   | 3.5E-02 | yes |
| ENSRNOT00000092086 : Picalm : Q66SY1    | 8.74 | yes | up   | 2.1E-13 | yes | chr1  | intron   | internal intron | NA  | 0.60 | no  | down | 0.06 | no  | 1.13 | no  | up   | 1.1E-06 | yes |
| MSTRG.16609.1 : Ece1 : Q6IN10           | 0.58 | yes | down | 9.3E-05 | yes | chr5  | intron   | internal intron | NA  | 1.87 | no  | up   | 0.74 | no  | 1.14 | no  | up   | 8.3E-15 | yes |
| ENSRNOT00000076489 : Becn1 : Q91XJ1     | 0.15 | yes | down | 1.2E-04 | yes | chr10 | exon     | first exon      | NA  | 1.88 | no  | up   | 0.18 | no  | 0.97 | no  | down | 9.2E-02 | no  |
| ENSRNOT00000083611 : Naa10 : D3ZUQ2     | 0.09 | yes | down | 2.8E-11 | yes | chrX  | intron   | internal intron | NA  | 0.33 | yes | down | 0.11 | no  | 1.04 | no  | up   | 2.6E-02 | yes |
| ENSRNOT00000007103 : Myef2 : A0A0G2K402 | 2.63 | yes | up   | 2.7E-04 | yes | chr3  | promoter | Intermediate    | LCP | 0.77 | no  | down | 0.28 | no  | 0.93 | no  | down | 4.5E-09 | yes |
| ENSRNOT00000062055 : Cast : F1LPH1      | 0.36 | yes | down | 1.6E-06 | yes | chr2  | intron   | internal intron | NA  | 1.07 | no  | up   | 0.82 | no  | 0.95 | no  | down | 2.4E-10 | yes |
| ENSRNOT00000090288 : Tpm1 : Q923Z2      | 9.41 | yes | up   | 5.1E-14 | yes | chr8  | intron   | internal intron | NA  | 0.97 | no  | down | 0.82 | no  | 0.75 | yes | down | 6.0E-18 | yes |
| MSTRG.4525.1 : Mx1 : Q499S4             | 3.65 | yes | up   | 1.1E-13 | yes | chr11 | intron   | internal intron | NA  | 0.58 | no  | down | 0.36 | no  | 1.36 | yes | up   | 1.2E-13 | yes |
| MSTRG.9435.3 : Tcerg1 : B5DEZ4          | 0.26 | yes | down | 2.8E-04 | yes | chr18 | promoter | Intermediate    | ICP | 0.92 | no  | down | 0.71 | no  | 1.02 | no  | up   | 4.4E-02 | yes |
| MSTRG.1783.1 : Tgfb1i1 : Q99PD6         | 3.08 | yes | up   | 7.2E-05 | yes | chr1  | intron   | internal intron | NA  | 0.71 | no  | down | 0.24 | no  | 1.06 | no  | up   | 1.6E-04 | yes |
| MSTRG.13653.2 : Xrn2 : D4A914           | 0.32 | yes | down | 3.4E-05 | yes | chr3  | intron   | internal intron | NA  | 0.75 | no  | down | 0.54 | no  | 1.03 | no  | up   | 8.8E-06 | yes |
| ENSRNOT00000026327 : Dag1 : F1M8K0      | 2.95 | yes | up   | 1.4E-04 | yes | chr8  | exon     | first exon      | NA  | 1.14 | no  | up   | 0.22 | no  | 0.91 | no  | down | 7.5E-12 | yes |
| MSTRG.2010.4 : Ppp6r3 : D3ZBT9          | 3.21 | yes | up   | 8.1E-07 | yes | chr1  | intron   | internal intron | NA  | 1.12 | no  | up   | 0.32 | no  | 0.98 | no  | down | 7.0E-03 | yes |
| ENSRNOT00000083957 : Rab27a : P23640    | 0.72 | yes | down | 7.7E-07 | yes | chr8  | exon     | internal exon   | NA  | 0.97 | no  | down | 0.97 | no  | 1.02 | no  | up   | 2.0E-01 | no  |
| ENSRNOT00000076266 : Parp4 : A0A096MJ98 | 1.23 | yes | up   | 1.1E-06 | yes | chr15 | intron   | last intron     | NA  | 0.97 | no  | down | 0.67 | no  | 1.00 | no  | down | 9.9E-01 | no  |
| MSTRG.4335.2 : Pcyt2 : O88637           | 4.82 | yes | up   | 3.0E-05 | yes | chr10 | intron   | last intron     | NA  | 1.54 | no  | up   | 0.03 | yes | 0.94 | no  | down | 1.8E-03 | yes |
| MSTRG.19253.2 : Smardc1 : D3ZBS9        | 0.24 | yes | down | 1.4E-04 | yes | chr7  | intron   | internal intron | NA  | 0.93 | no  | down | 0.71 | no  | 0.95 | no  | down | 2.9E-07 | yes |
| ENSRNOT00000041678 : Tyk2 : D3ZD03      | 0.17 | yes | down | 1.5E-06 | yes | chr8  | intron   | internal intron | NA  | 1.39 | no  | up   | 0.21 | no  | 1.01 | no  | up   | 4.7E-01 | no  |
| ENSRNOT00000086272 : Ndurf3 : G3V644    | 0    | yes | down | 1.9E-04 | yes | chr20 | intron   | first intron    | NA  | 0.74 | no  | down | 0.22 | no  | 1.00 | no  | up   | 9.0E-01 | no  |
| MSTRG.8325.5 : Hook3 : Q7TQ77           | 0.22 | yes | down | 2.1E-04 | yes | chr16 | intron   | internal intron | NA  | 0.25 | yes | down | 0.21 | no  | 1.01 | no  | up   | 5.0E-03 | yes |
| ENSRNOT00000090470 : Exoc1 : A0A0G2K2V5 | inf  | yes | up   | 6.1E-05 | yes | chr14 | intron   | first intron    | NA  | 1.00 | no  | down | 0.98 | no  | 0.90 | no  | down | 2.2E-04 | yes |
| MSTRG.10871.9 : Dcun1d1 : D3ZRV0        | 1.60 | yes | up   | 3.7E-04 | yes | chr2  | exon     | internal exon   | NA  | 1.09 | no  | up   | 0.73 | no  | 0.97 | no  | down | 2.6E-02 | yes |
